# Supplementary material
Source: ML conference proceedings conference paper supplement (https://proceedings.mlr.press/v130/kuhnle21a.html)
Supplement: Supplementary file 1 [file kuhnle21a-supp.zip]

Archive with 29 entries (22 files):
- 553-supp/
- 553-supp/553full.pdf
- 553-supp/code/
- 553-supp/code/exp/
- 553-supp/code/exp/single-pass/
- 553-supp/code/exp/single-pass/reproduce.bash
- 553-supp/code/exp/single-pass/run.bash
- 553-supp/code/exp/single-pass/plot.py
- 553-supp/code/exp/general/
- 553-supp/code/exp/general/reproduce.bash
- 553-supp/code/exp/general/explogfile
- 553-supp/code/exp/general/run.bash
- 553-supp/code/exp/general/plot.py
- 553-supp/code/gen-table.bash
- 553-supp/code/Makefile
- 553-supp/code/data/
- 553-supp/code/data/ba.5k
- 553-supp/code/data/ba.5k.bin
- 553-supp/code/src/
- 553-supp/code/src/diff.tt
- 553-supp/code/src/preprocess.cpp
- 553-supp/code/src/main.cpp
- 553-supp/code/src/gen_ba.cpp
- 553-supp/code/src/binheap.cpp
- 553-supp/code/src/gen_er.cpp
- 553-supp/code/src/logger.cpp
- 553-supp/code/src/algs.cpp
- 553-supp/code/src/mygraph.cpp
- 553-supp/code/README.md
