# Supplementary material
Source: ML conference proceedings conference paper supplement (https://proceedings.mlr.press/v130/kuhnle21a.html)
Supplement: Supplementary file 1 [file kuhnle21a-supp.zip › 553-supp/code/data/ba.5k]

5000 0 0
0 1
0 2
0 3
0 4
0 5
0 6
0 7
0 8
0 9
0 10
0 11
0 12
0 13
0 14
0 15
0 16
0 17
0 18
0 19
0 23
0 24
0 25
0 28
0 31
0 33
0 40
0 41
0 45
0 49
0 50
0 54
0 62
0 69
0 70
0 75
0 77
0 78
0 79
0 80
0 83
0 87
0 90
0 92
0 95
0 98
0 101
0 102
0 104
0 111
0 116
0 120
0 122
0 128
0 132
0 133
0 147
0 149
0 150
0 151
0 152
0 157
0 161
0 169
0 170
0 171
0 182
0 184
0 193
0 194
0 208
0 211
0 216
0 223
0 225
0 238
0 240
0 243
0 244
0 260
0 262
0 267
0 271
0 280
0 289
0 295
0 298
0 299
0 300
0 310
0 320
0 321
0 324
0 330
0 336
0 338
0 343
0 378
0 380
0 382
0 386
0 396
0 397
0 404
0 421
0 424
0 431
0 461
0 462
0 463
0 464
0 484
0 494
0 502
0 504
0 519
0 526
0 527
0 530
0 531
0 533
0 539
0 545
0 575
0 579
0 581
0 588
0 590
0 592
0 596
0 602
0 610
0 615
0 633
0 642
0 648
0 650
0 656
0 671
0 690
0 712
0 717
0 719
0 731
0 733
0 741
0 748
0 750
0 758
0 781
0 817
0 833
0 840
0 846
0 857
0 865
0 879
0 894
0 899
0 902
0 911
0 962
0 984
0 989
0 1008
0 1028
0 1062
0 1069
0 1074
0 1077
0 1081
0 1093
0 1100
0 1104
0 1107
0 1113
0 1120
0 1131
0 1183
0 1186
0 1209
0 1213
0 1217
0 1235
0 1243
0 1245
0 1254
0 1279
0 1346
0 1347
0 1367
0 1372
0 1377
0 1415
0 1420
0 1425
0 1438
0 1458
0 1463
0 1511
0 1521
0 1530
0 1536
0 1541
0 1603
0 1611
0 1617
0 1625
0 1639
0 1642
0 1651
0 1675
0 1681
0 1682
0 1710
0 1745
0 1783
0 1794
0 1808
0 1812
0 1814
0 1837
0 1856
0 1860
0 1873
0 1875
0 1882
0 1919
0 1922
0 1923
0 1925
0 1928
0 1960
0 1965
0 1967
0 1968
0 1974
0 1977
0 1979
0 1980
0 1997
0 1999
0 2016
0 2052
0 2056
0 2059
0 2091
0 2161
0 2178
0 2189
0 2199
0 2209
0 2214
0 2228
0 2247
0 2272
0 2280
0 2285
0 2286
0 2312
0 2314
0 2405
0 2406
0 2416
0 2465
0 2484
0 2493
0 2502
0 2504
0 2514
0 2532
0 2583
0 2591
0 2617
0 2647
0 2687
0 2691
0 2761
0 2780
0 2785
0 2786
0 2801
0 2823
0 2835
0 2856
0 2863
0 2875
0 2877
0 2886
0 2921
0 2964
0 2995
0 3012
0 3015
0 3017
0 3021
0 3041
0 3050
0 3056
0 3066
0 3100
0 3105
0 3119
0 3182
0 3198
0 3203
0 3204
0 3216
0 3224
0 3233
0 3249
0 3252
0 3255
0 3267
0 3342
0 3345
0 3349
0 3359
0 3360
0 3368
0 3380
0 3408
0 3413
0 3417
0 3425
0 3453
0 3464
0 3468
0 3487
0 3495
0 3539
0 3546
0 3548
0 3551
0 3556
0 3594
0 3634
0 3671
0 3680
0 3681
0 3685
0 3715
0 3767
0 3803
0 3820
0 3860
0 3861
0 3867
0 3908
0 3947
0 3948
0 3951
0 3973
0 4008
0 4019
0 4020
0 4025
0 4029
0 4101
0 4103
0 4126
0 4183
0 4197
0 4202
0 4235
0 4244
0 4265
0 4302
0 4312
0 4379
0 4381
0 4431
0 4449
0 4485
0 4492
0 4519
0 4537
0 4541
0 4553
0 4564
0 4631
0 4636
0 4744
0 4746
0 4749
0 4761
0 4794
0 4800
0 4815
0 4831
0 4848
0 4857
0 4874
0 4875
0 4894
0 4910
0 4932
0 4935
0 4952
1 0
1 2
1 3
1 4
1 5
1 6
1 7
1 8
1 9
1 10
1 11
1 12
1 13
1 14
1 15
1 16
1 17
1 18
1 19
1 21
1 22
1 23
1 24
1 28
1 29
1 30
1 40
1 41
1 55
1 56
1 62
1 64
1 66
1 68
1 71
1 72
1 76
1 83
1 85
1 86
1 88
1 97
1 98
1 103
1 105
1 109
1 116
1 140
1 142
1 146
1 148
1 155
1 156
1 161
1 169
1 174
1 181
1 184
1 192
1 198
1 199
1 204
1 210
1 220
1 226
1 230
1 244
1 266
1 287
1 319
1 320
1 331
1 337
1 362
1 363
1 377
1 412
1 420
1 423
1 433
1 443
1 446
1 454
1 455
1 462
1 475
1 510
1 524
1 531
1 532
1 561
1 565
1 569
1 602
1 612
1 617
1 619
1 626
1 654
1 657
1 660
1 670
1 675
1 686
1 708
1 722
1 729
1 732
1 783
1 807
1 819
1 857
1 876
1 877
1 886
1 900
1 908
1 911
1 949
1 951
1 1031
1 1034
1 1045
1 1079
1 1096
1 1137
1 1157
1 1170
1 1176
1 1181
1 1215
1 1217
1 1259
1 1262
1 1278
1 1292
1 1326
1 1342
1 1373
1 1443
1 1451
1 1458
1 1467
1 1480
1 1498
1 1531
1 1561
1 1562
1 1579
1 1581
1 1634
1 1646
1 1648
1 1654
1 1664
1 1683
1 1698
1 1805
1 1827
1 1850
1 1860
1 1871
1 1950
1 1960
1 1968
1 1985
1 1989
1 1992
1 2034
1 2044
1 2063
1 2084
1 2085
1 2086
1 2091
1 2105
1 2138
1 2144
1 2150
1 2162
1 2216
1 2256
1 2298
1 2303
1 2349
1 2359
1 2367
1 2372
1 2373
1 2374
1 2380
1 2414
1 2436
1 2481
1 2497
1 2599
1 2642
1 2660
1 2669
1 2700
1 2702
1 2780
1 2795
1 2819
1 2868
1 2880
1 2907
1 2919
1 2921
1 2956
1 3025
1 3030
1 3103
1 3112
1 3178
1 3184
1 3213
1 3216
1 3220
1 3249
1 3276
1 3289
1 3322
1 3325
1 3335
1 3385
1 3392
1 3394
1 3396
1 3412
1 3447
1 3493
1 3497
1 3521
1 3529
1 3547
1 3583
1 3628
1 3669
1 3792
1 3852
1 3883
1 3889
1 3904
1 3920
1 3944
1 3972
1 3979
1 4050
1 4065
1 4083
1 4139
1 4211
1 4224
1 4244
1 4273
1 4317
1 4320
1 4335
1 4357
1 4362
1 4370
1 4421
1 4453
1 4542
1 4595
1 4654
1 4670
1 4673
1 4715
1 4794
1 4795
1 4850
1 4863
1 4890
1 4905
1 4916
1 4949
1 4976
2 0
2 1
2 3
2 4
2 5
2 6
2 7
2 8
2 9
2 10
2 11
2 12
2 13
2 14
2 15
2 16
2 17
2 18
2 19
2 20
2 21
2 22
2 25
2 27
2 28
2 29
2 31
2 32
2 34
2 40
2 43
2 44
2 52
2 53
2 61
2 64
2 66
2 67
2 72
2 74
2 78
2 79
2 81
2 87
2 93
2 96
2 103
2 105
2 117
2 119
2 120
2 122
2 124
2 126
2 128
2 139
2 144
2 148
2 152
2 154
2 156
2 158
2 160
2 164
2 170
2 171
2 176
2 177
2 179
2 182
2 185
2 189
2 191
2 194
2 195
2 205
2 206
2 207
2 216
2 218
2 221
2 248
2 259
2 260
2 263
2 270
2 272
2 274
2 280
2 302
2 304
2 305
2 306
2 307
2 308
2 316
2 327
2 329
2 332
2 335
2 336
2 338
2 344
2 349
2 355
2 378
2 383
2 389
2 394
2 413
2 414
2 424
2 426
2 428
2 434
2 436
2 471
2 481
2 487
2 495
2 497
2 500
2 503
2 509
2 517
2 549
2 553
2 564
2 580
2 583
2 589
2 591
2 596
2 597
2 601
2 627
2 634
2 637
2 662
2 679
2 681
2 715
2 720
2 754
2 763
2 770
2 783
2 796
2 811
2 813
2 816
2 831
2 856
2 863
2 889
2 901
2 905
2 909
2 922
2 943
2 944
2 978
2 994
2 998
2 1010
2 1017
2 1021
2 1031
2 1033
2 1042
2 1123
2 1138
2 1150
2 1155
2 1163
2 1194
2 1220
2 1230
2 1253
2 1277
2 1317
2 1343
2 1351
2 1359
2 1391
2 1403
2 1435
2 1443
2 1451
2 1460
2 1464
2 1474
2 1479
2 1494
2 1501
2 1506
2 1520
2 1523
2 1526
2 1540
2 1553
2 1562
2 1581
2 1590
2 1601
2 1611
2 1631
2 1635
2 1658
2 1665
2 1671
2 1676
2 1703
2 1762
2 1776
2 1784
2 1800
2 1814
2 1838
2 1840
2 1867
2 1910
2 1927
2 1929
2 1931
2 1977
2 2012
2 2017
2 2020
2 2042
2 2106
2 2141
2 2144
2 2153
2 2185
2 2193
2 2210
2 2218
2 2258
2 2358
2 2359
2 2360
2 2369
2 2386
2 2411
2 2423
2 2435
2 2459
2 2460
2 2463
2 2467
2 2471
2 2507
2 2562
2 2571
2 2575
2 2589
2 2608
2 2610
2 2617
2 2645
2 2647
2 2653
2 2682
2 2695
2 2704
2 2739
2 2746
2 2770
2 2798
2 2813
2 2842
2 2843
2 2877
2 2885
2 2898
2 2928
2 2931
2 2972
2 2975
2 2985
2 2992
2 3011
2 3018
2 3024
2 3029
2 3032
2 3065
2 3074
2 3078
2 3101
2 3102
2 3119
2 3127
2 3144
2 3154
2 3202
2 3213
2 3214
2 3238
2 3241
2 3253
2 3278
2 3283
2 3315
2 3344
2 3355
2 3429
2 3459
2 3465
2 3498
2 3545
2 3603
2 3610
2 3641
2 3651
2 3659
2 3691
2 3708
2 3727
2 3729
2 3732
2 3769
2 3775
2 3783
2 3800
2 3846
2 3874
2 3877
2 3882
2 3893
2 3899
2 3904
2 3909
2 3950
2 3980
2 4032
2 4040
2 4054
2 4076
2 4079
2 4093
2 4108
2 4145
2 4152
2 4168
2 4192
2 4193
2 4202
2 4203
2 4271
2 4285
2 4295
2 4311
2 4347
2 4369
2 4423
2 4424
2 4425
2 4446
2 4462
2 4488
2 4510
2 4512
2 4531
2 4537
2 4585
2 4634
2 4637
2 4644
2 4655
2 4661
2 4683
2 4690
2 4702
2 4723
2 4784
2 4848
2 4849
2 4856
2 4863
2 4885
2 4914
2 4981
2 4995
3 0
3 1
3 2
3 4
3 5
3 6
3 7
3 8
3 9
3 10
3 11
3 12
3 13
3 14
3 15
3 16
3 17
3 18
3 19
3 21
3 23
3 25
3 32
3 33
3 35
3 40
3 41
3 46
3 48
3 49
3 55
3 56
3 59
3 67
3 69
3 70
3 78
3 80
3 91
3 92
3 93
3 95
3 96
3 106
3 117
3 124
3 147
3 150
3 156
3 161
3 165
3 174
3 178
3 181
3 205
3 264
3 266
3 283
3 288
3 298
3 336
3 354
3 357
3 369
3 375
3 382
3 388
3 394
3 397
3 398
3 400
3 408
3 421
3 424
3 442
3 443
3 451
3 453
3 460
3 468
3 480
3 502
3 506
3 511
3 516
3 555
3 560
3 573
3 594
3 603
3 604
3 626
3 632
3 639
3 640
3 683
3 695
3 711
3 719
3 740
3 741
3 745
3 765
3 767
3 776
3 805
3 814
3 819
3 847
3 876
3 888
3 899
3 903
3 932
3 969
3 972
3 976
3 982
3 992
3 1002
3 1008
3 1012
3 1045
3 1052
3 1061
3 1063
3 1103
3 1125
3 1126
3 1131
3 1143
3 1153
3 1165
3 1167
3 1180
3 1204
3 1220
3 1243
3 1247
3 1284
3 1296
3 1324
3 1332
3 1336
3 1347
3 1351
3 1377
3 1383
3 1390
3 1404
3 1424
3 1446
3 1450
3 1452
3 1499
3 1511
3 1528
3 1560
3 1575
3 1588
3 1592
3 1603
3 1612
3 1614
3 1639
3 1675
3 1683
3 1689
3 1701
3 1708
3 1732
3 1742
3 1774
3 1787
3 1802
3 1837
3 1841
3 1856
3 1922
3 1945
3 1957
3 1984
3 1994
3 2063
3 2078
3 2081
3 2093
3 2104
3 2146
3 2147
3 2165
3 2173
3 2208
3 2225
3 2227
3 2237
3 2251
3 2270
3 2286
3 2291
3 2306
3 2372
3 2382
3 2418
3 2488
3 2506
3 2587
3 2590
3 2608
3 2611
3 2618
3 2642
3 2744
3 2745
3 2759
3 2763
3 2821
3 2886
3 2897
3 2900
3 2938
3 2965
3 2990
3 2995
3 3014
3 3053
3 3092
3 3117
3 3146
3 3150
3 3270
3 3273
3 3282
3 3287
3 3304
3 3318
3 3334
3 3338
3 3343
3 3370
3 3378
3 3440
3 3472
3 3480
3 3485
3 3585
3 3587
3 3589
3 3593
3 3604
3 3663
3 3709
3 3824
3 3825
3 3869
3 3878
3 3916
3 3923
3 3931
3 3933
3 3936
3 3986
3 4042
3 4076
3 4109
3 4149
3 4152
3 4179
3 4186
3 4202
3 4215
3 4228
3 4249
3 4252
3 4254
3 4262
3 4304
3 4335
3 4350
3 4355
3 4373
3 4389
3 4396
3 4400
3 4461
3 4469
3 4516
3 4558
3 4574
3 4588
3 4649
3 4665
3 4668
3 4670
3 4674
3 4701
3 4719
3 4820
3 4835
3 4842
3 4847
3 4862
3 4926
3 4976
4 0
4 1
4 2
4 3
4 5
4 6
4 7
4 8
4 9
4 10
4 11
4 12
4 13
4 14
4 15
4 16
4 17
4 18
4 19
4 20
4 21
4 22
4 25
4 26
4 27
4 28
4 34
4 38
4 49
4 60
4 61
4 69
4 71
4 87
4 94
4 99
4 102
4 125
4 148
4 149
4 160
4 189
4 193
4 206
4 209
4 225
4 246
4 257
4 260
4 291
4 292
4 303
4 309
4 313
4 319
4 326
4 337
4 342
4 368
4 390
4 405
4 419
4 422
4 424
4 430
4 447
4 454
4 460
4 468
4 476
4 480
4 489
4 510
4 526
4 539
4 557
4 561
4 573
4 581
4 583
4 603
4 613
4 634
4 639
4 653
4 668
4 669
4 690
4 707
4 777
4 798
4 847
4 865
4 871
4 872
4 881
4 896
4 897
4 903
4 911
4 970
4 973
4 979
4 987
4 994
4 1003
4 1005
4 1020
4 1037
4 1066
4 1087
4 1088
4 1093
4 1102
4 1112
4 1116
4 1131
4 1143
4 1170
4 1174
4 1186
4 1199
4 1206
4 1207
4 1238
4 1239
4 1242
4 1257
4 1328
4 1330
4 1355
4 1368
4 1415
4 1417
4 1456
4 1460
4 1479
4 1482
4 1509
4 1519
4 1539
4 1587
4 1594
4 1617
4 1631
4 1642
4 1681
4 1696
4 1704
4 1722
4 1756
4 1807
4 1833
4 1858
4 1862
4 1870
4 1878
4 1900
4 1901
4 1916
4 1933
4 1935
4 1941
4 1957
4 1962
4 1966
4 2033
4 2037
4 2066
4 2090
4 2092
4 2109
4 2122
4 2151
4 2195
4 2268
4 2309
4 2311
4 2335
4 2344
4 2388
4 2398
4 2400
4 2406
4 2408
4 2409
4 2457
4 2480
4 2484
4 2488
4 2557
4 2574
4 2584
4 2586
4 2593
4 2625
4 2626
4 2678
4 2679
4 2719
4 2722
4 2738
4 2775
4 2811
4 2856
4 2880
4 2911
4 2920
4 2951
4 2966
4 2991
4 3010
4 3011
4 3023
4 3025
4 3091
4 3102
4 3103
4 3128
4 3162
4 3184
4 3201
4 3271
4 3291
4 3306
4 3309
4 3432
4 3476
4 3488
4 3627
4 3631
4 3632
4 3664
4 3735
4 3762
4 3828
4 3848
4 3900
4 3949
4 3959
4 3972
4 4009
4 4010
4 4041
4 4082
4 4137
4 4151
4 4163
4 4185
4 4188
4 4189
4 4234
4 4262
4 4279
4 4287
4 4315
4 4321
4 4324
4 4339
4 4359
4 4361
4 4368
4 4373
4 4422
4 4438
4 4459
4 4462
4 4479
4 4489
4 4508
4 4546
4 4568
4 4571
4 4591
4 4620
4 4621
4 4636
4 4697
4 4729
4 4767
4 4769
4 4850
4 4851
4 4859
4 4891
4 4911
4 4973
4 4978
4 4997
5 0
5 1
5 2
5 3
5 4
5 6
5 7
5 8
5 9
5 10
5 11
5 12
5 13
5 14
5 15
5 16
5 17
5 18
5 19
5 22
5 25
5 26
5 31
5 32
5 39
5 40
5 45
5 51
5 53
5 55
5 59
5 60
5 62
5 73
5 82
5 86
5 88
5 89
5 94
5 99
5 100
5 105
5 111
5 118
5 140
5 147
5 148
5 149
5 156
5 162
5 170
5 171
5 186
5 188
5 191
5 212
5 217
5 219
5 229
5 231
5 234
5 238
5 295
5 296
5 317
5 329
5 334
5 335
5 344
5 348
5 349
5 352
5 354
5 402
5 409
5 413
5 416
5 417
5 426
5 438
5 441
5 442
5 461
5 469
5 470
5 489
5 506
5 522
5 545
5 549
5 557
5 570
5 581
5 589
5 596
5 597
5 603
5 626
5 631
5 633
5 643
5 668
5 678
5 682
5 685
5 698
5 705
5 741
5 745
5 755
5 770
5 775
5 781
5 785
5 792
5 801
5 802
5 811
5 817
5 833
5 843
5 847
5 859
5 869
5 888
5 903
5 918
5 929
5 956
5 959
5 968
5 982
5 984
5 986
5 993
5 1013
5 1021
5 1024
5 1025
5 1068
5 1095
5 1114
5 1116
5 1124
5 1142
5 1164
5 1216
5 1230
5 1236
5 1245
5 1251
5 1263
5 1270
5 1300
5 1315
5 1329
5 1335
5 1337
5 1342
5 1344
5 1365
5 1370
5 1416
5 1482
5 1509
5 1517
5 1535
5 1540
5 1543
5 1550
5 1586
5 1599
5 1617
5 1636
5 1666
5 1681
5 1690
5 1692
5 1706
5 1710
5 1715
5 1717
5 1725
5 1737
5 1739
5 1771
5 1784
5 1797
5 1800
5 1805
5 1834
5 1836
5 1842
5 1876
5 1897
5 1954
5 1970
5 1998
5 2007
5 2038
5 2042
5 2052
5 2080
5 2095
5 2096
5 2097
5 2160
5 2188
5 2191
5 2215
5 2220
5 2222
5 2224
5 2235
5 2249
5 2271
5 2282
5 2298
5 2299
5 2319
5 2323
5 2361
5 2443
5 2464
5 2471
5 2483
5 2490
5 2543
5 2565
5 2622
5 2667
5 2699
5 2714
5 2718
5 2754
5 2770
5 2808
5 2837
5 2839
5 2867
5 2938
5 2953
5 2956
5 2977
5 3058
5 3148
5 3160
5 3174
5 3207
5 3235
5 3237
5 3245
5 3263
5 3271
5 3312
5 3385
5 3402
5 3404
5 3497
5 3503
5 3506
5 3542
5 3563
5 3641
5 3653
5 3654
5 3675
5 3690
5 3696
5 3702
5 3709
5 3781
5 3835
5 3887
5 3898
5 3913
5 3925
5 4002
5 4009
5 4025
5 4064
5 4082
5 4109
5 4135
5 4166
5 4169
5 4235
5 4240
5 4293
5 4313
5 4342
5 4351
5 4377
5 4385
5 4392
5 4446
5 4463
5 4487
5 4545
5 4651
5 4664
5 4674
5 4707
5 4748
5 4775
5 4871
5 4874
5 4902
5 4926
5 4970
5 4986
6 0
6 1
6 2
6 3
6 4
6 5
6 7
6 8
6 9
6 10
6 11
6 12
6 13
6 14
6 15
6 16
6 17
6 18
6 19
6 20
6 26
6 27
6 31
6 37
6 38
6 42
6 44
6 48
6 50
6 66
6 70
6 76
6 79
6 81
6 85
6 93
6 94
6 98
6 101
6 107
6 111
6 119
6 120
6 121
6 124
6 126
6 128
6 131
6 141
6 151
6 153
6 185
6 188
6 190
6 194
6 226
6 270
6 280
6 286
6 306
6 328
6 351
6 357
6 385
6 387
6 391
6 401
6 411
6 414
6 421
6 498
6 522
6 531
6 534
6 535
6 568
6 570
6 594
6 615
6 620
6 623
6 644
6 664
6 684
6 687
6 708
6 712
6 749
6 795
6 801
6 804
6 811
6 821
6 836
6 844
6 845
6 864
6 871
6 962
6 1015
6 1023
6 1049
6 1076
6 1083
6 1156
6 1219
6 1224
6 1238
6 1263
6 1275
6 1284
6 1285
6 1317
6 1328
6 1366
6 1372
6 1378
6 1394
6 1401
6 1430
6 1456
6 1462
6 1499
6 1503
6 1504
6 1528
6 1540
6 1572
6 1573
6 1577
6 1585
6 1593
6 1621
6 1647
6 1715
6 1761
6 1770
6 1791
6 1807
6 1848
6 1862
6 1864
6 1917
6 1934
6 1935
6 1962
6 1975
6 1978
6 2000
6 2082
6 2083
6 2110
6 2117
6 2179
6 2194
6 2243
6 2287
6 2302
6 2303
6 2328
6 2330
6 2343
6 2344
6 2364
6 2375
6 2393
6 2394
6 2421
6 2438
6 2447
6 2461
6 2516
6 2546
6 2639
6 2651
6 2659
6 2693
6 2699
6 2715
6 2799
6 2805
6 2820
6 2828
6 2834
6 2910
6 2911
6 2975
6 2992
6 2994
6 3030
6 3051
6 3058
6 3062
6 3102
6 3126
6 3184
6 3191
6 3219
6 3229
6 3276
6 3288
6 3303
6 3307
6 3322
6 3384
6 3460
6 3500
6 3512
6 3515
6 3520
6 3557
6 3574
6 3575
6 3584
6 3588
6 3596
6 3629
6 3637
6 3662
6 3682
6 3710
6 3842
6 3877
6 3878
6 3884
6 3885
6 3887
6 3922
6 3942
6 3963
6 4089
6 4141
6 4171
6 4183
6 4211
6 4244
6 4246
6 4256
6 4289
6 4325
6 4382
6 4416
6 4479
6 4511
6 4558
6 4630
6 4734
6 4783
6 4825
6 4839
6 4889
6 4904
6 4929
6 4942
6 4969
7 0
7 1
7 2
7 3
7 4
7 5
7 6
7 8
7 9
7 10
7 11
7 12
7 13
7 14
7 15
7 16
7 17
7 18
7 19
7 21
7 23
7 27
7 30
7 32
7 33
7 35
7 36
7 38
7 39
7 45
7 46
7 50
7 51
7 52
7 58
7 63
7 69
7 75
7 77
7 83
7 84
7 94
7 95
7 103
7 106
7 112
7 114
7 132
7 138
7 142
7 178
7 179
7 191
7 192
7 198
7 203
7 205
7 207
7 211
7 213
7 226
7 228
7 246
7 248
7 258
7 273
7 280
7 285
7 286
7 290
7 318
7 322
7 323
7 329
7 336
7 341
7 348
7 353
7 356
7 359
7 368
7 372
7 380
7 383
7 390
7 413
7 415
7 419
7 424
7 433
7 434
7 442
7 444
7 464
7 467
7 477
7 509
7 516
7 526
7 527
7 530
7 540
7 544
7 546
7 551
7 553
7 589
7 612
7 636
7 667
7 668
7 680
7 692
7 699
7 705
7 723
7 736
7 749
7 755
7 765
7 775
7 782
7 802
7 826
7 837
7 860
7 876
7 892
7 906
7 921
7 931
7 935
7 941
7 942
7 943
7 952
7 953
7 988
7 1009
7 1015
7 1040
7 1042
7 1064
7 1065
7 1066
7 1082
7 1102
7 1129
7 1144
7 1148
7 1173
7 1176
7 1203
7 1206
7 1207
7 1210
7 1212
7 1239
7 1255
7 1260
7 1332
7 1333
7 1335
7 1356
7 1364
7 1366
7 1377
7 1404
7 1424
7 1436
7 1451
7 1452
7 1456
7 1467
7 1476
7 1510
7 1602
7 1616
7 1628
7 1664
7 1677
7 1689
7 1744
7 1748
7 1756
7 1762
7 1764
7 1802
7 1850
7 1856
7 1867
7 1906
7 1923
7 1932
7 1963
7 1995
7 1999
7 2007
7 2012
7 2023
7 2034
7 2043
7 2060
7 2072
7 2100
7 2152
7 2181
7 2190
7 2200
7 2213
7 2229
7 2253
7 2289
7 2296
7 2333
7 2347
7 2353
7 2391
7 2397
7 2426
7 2430
7 2431
7 2449
7 2460
7 2483
7 2495
7 2536
7 2570
7 2581
7 2597
7 2620
7 2623
7 2630
7 2647
7 2655
7 2680
7 2706
7 2735
7 2807
7 2828
7 2845
7 2859
7 2883
7 2888
7 2898
7 2901
7 2914
7 2917
7 2924
7 2926
7 2940
7 2973
7 2993
7 2999
7 3002
7 3019
7 3036
7 3050
7 3052
7 3195
7 3208
7 3217
7 3232
7 3253
7 3293
7 3295
7 3341
7 3386
7 3428
7 3462
7 3464
7 3515
7 3530
7 3578
7 3584
7 3591
7 3617
7 3641
7 3663
7 3671
7 3679
7 3721
7 3731
7 3738
7 3745
7 3746
7 3766
7 3776
7 3795
7 3798
7 3812
7 3833
7 3836
7 3857
7 3860
7 3862
7 3904
7 3927
7 3984
7 4113
7 4118
7 4124
7 4125
7 4248
7 4251
7 4269
7 4272
7 4288
7 4315
7 4317
7 4346
7 4401
7 4421
7 4457
7 4459
7 4470
7 4484
7 4517
7 4520
7 4531
7 4544
7 4545
7 4573
7 4584
7 4599
7 4605
7 4654
7 4672
7 4688
7 4701
7 4708
7 4751
7 4766
7 4798
7 4832
7 4842
7 4843
7 4850
7 4876
7 4938
8 0
8 1
8 2
8 3
8 4
8 5
8 6
8 7
8 9
8 10
8 11
8 12
8 13
8 14
8 15
8 16
8 17
8 18
8 19
8 23
8 28
8 31
8 33
8 35
8 39
8 43
8 44
8 46
8 50
8 56
8 64
8 66
8 68
8 73
8 94
8 95
8 96
8 104
8 108
8 120
8 124
8 125
8 131
8 135
8 156
8 159
8 169
8 175
8 188
8 193
8 197
8 206
8 225
8 226
8 229
8 231
8 232
8 234
8 247
8 249
8 257
8 278
8 282
8 293
8 303
8 312
8 315
8 317
8 326
8 343
8 344
8 350
8 353
8 356
8 361
8 362
8 363
8 367
8 376
8 379
8 385
8 404
8 429
8 436
8 448
8 452
8 453
8 483
8 506
8 510
8 519
8 521
8 524
8 538
8 550
8 555
8 567
8 613
8 651
8 663
8 702
8 703
8 704
8 717
8 722
8 726
8 733
8 752
8 763
8 767
8 768
8 780
8 788
8 797
8 818
8 831
8 839
8 861
8 877
8 917
8 922
8 924
8 937
8 946
8 964
8 971
8 982
8 1001
8 1003
8 1033
8 1044
8 1049
8 1054
8 1063
8 1079
8 1085
8 1086
8 1087
8 1092
8 1099
8 1103
8 1134
8 1135
8 1150
8 1160
8 1172
8 1177
8 1179
8 1185
8 1198
8 1217
8 1234
8 1245
8 1253
8 1256
8 1258
8 1282
8 1297
8 1384
8 1391
8 1405
8 1410
8 1411
8 1421
8 1422
8 1430
8 1434
8 1435
8 1485
8 1491
8 1492
8 1535
8 1538
8 1566
8 1619
8 1621
8 1635
8 1658
8 1666
8 1667
8 1678
8 1698
8 1712
8 1773
8 1777
8 1824
8 1825
8 1834
8 1878
8 1882
8 1887
8 1902
8 1931
8 1939
8 1940
8 1966
8 1970
8 1983
8 2005
8 2009
8 2039
8 2087
8 2128
8 2139
8 2144
8 2163
8 2177
8 2187
8 2216
8 2262
8 2306
8 2329
8 2344
8 2390
8 2456
8 2467
8 2474
8 2491
8 2498
8 2506
8 2527
8 2575
8 2599
8 2648
8 2682
8 2821
8 2823
8 2852
8 2918
8 2926
8 2946
8 2947
8 2968
8 2970
8 2978
8 2985
8 2992
8 2995
8 2996
8 3005
8 3051
8 3060
8 3078
8 3079
8 3090
8 3106
8 3115
8 3163
8 3184
8 3201
8 3210
8 3254
8 3260
8 3277
8 3289
8 3304
8 3315
8 3335
8 3369
8 3383
8 3397
8 3423
8 3487
8 3494
8 3503
8 3511
8 3521
8 3527
8 3536
8 3546
8 3566
8 3585
8 3622
8 3632
8 3661
8 3755
8 3779
8 3800
8 3830
8 3836
8 3852
8 3874
8 3891
8 3924
8 3952
8 3985
8 3990
8 4036
8 4038
8 4080
8 4119
8 4154
8 4160
8 4184
8 4229
8 4262
8 4324
8 4396
8 4405
8 4424
8 4443
8 4487
8 4542
8 4545
8 4616
8 4640
8 4657
8 4660
8 4700
8 4749
8 4765
8 4780
8 4787
8 4846
8 4913
9 0
9 1
9 2
9 3
9 4
9 5
9 6
9 7
9 8
9 10
9 11
9 12
9 13
9 14
9 15
9 16
9 17
9 18
9 19
9 20
9 23
9 27
9 29
9 34
9 36
9 38
9 42
9 45
9 47
9 50
9 53
9 59
9 61
9 64
9 68
9 74
9 89
9 93
9 98
9 112
9 118
9 126
9 127
9 150
9 167
9 178
9 188
9 189
9 196
9 197
9 205
9 214
9 215
9 222
9 227
9 230
9 245
9 253
9 263
9 264
9 281
9 294
9 298
9 304
9 306
9 307
9 308
9 309
9 318
9 325
9 327
9 330
9 334
9 337
9 355
9 365
9 395
9 399
9 409
9 417
9 423
9 432
9 455
9 472
9 491
9 494
9 503
9 536
9 575
9 626
9 635
9 636
9 646
9 700
9 709
9 759
9 818
9 835
9 838
9 849
9 851
9 867
9 872
9 885
9 917
9 950
9 969
9 973
9 976
9 981
9 1046
9 1063
9 1076
9 1077
9 1110
9 1140
9 1154
9 1192
9 1292
9 1294
9 1309
9 1326
9 1334
9 1360
9 1372
9 1427
9 1436
9 1447
9 1463
9 1487
9 1545
9 1548
9 1557
9 1602
9 1641
9 1652
9 1653
9 1683
9 1690
9 1692
9 1722
9 1729
9 1735
9 1756
9 1763
9 1806
9 1817
9 1865
9 1894
9 1945
9 1994
9 1996
9 2126
9 2170
9 2257
9 2291
9 2310
9 2359
9 2363
9 2378
9 2392
9 2520
9 2523
9 2542
9 2552
9 2599
9 2610
9 2611
9 2666
9 2682
9 2717
9 2734
9 2735
9 2765
9 2773
9 2780
9 2798
9 2826
9 2827
9 2841
9 2885
9 2902
9 2903
9 2961
9 2970
9 2972
9 3019
9 3027
9 3034
9 3054
9 3168
9 3172
9 3180
9 3197
9 3208
9 3282
9 3322
9 3344
9 3351
9 3381
9 3422
9 3700
9 3747
9 3751
9 3764
9 3782
9 3783
9 3793
9 3842
9 3981
9 4045
9 4053
9 4095
9 4097
9 4099
9 4117
9 4149
9 4183
9 4229
9 4323
9 4350
9 4364
9 4366
9 4413
9 4415
9 4504
9 4549
9 4581
9 4582
9 4583
9 4605
9 4633
9 4642
9 4695
9 4706
9 4739
9 4761
9 4764
9 4783
9 4784
9 4798
9 4824
9 4825
9 4834
9 4867
9 4897
9 4913
9 4963
9 4976
9 4984
10 0
10 1
10 2
10 3
10 4
10 5
10 6
10 7
10 8
10 9
10 11
10 12
10 13
10 14
10 15
10 16
10 17
10 18
10 19
10 21
10 23
10 26
10 28
10 30
10 31
10 32
10 47
10 53
10 54
10 56
10 61
10 62
10 63
10 72
10 78
10 86
10 103
10 104
10 106
10 109
10 118
10 119
10 127
10 130
10 132
10 145
10 151
10 162
10 163
10 167
10 169
10 196
10 201
10 208
10 217
10 219
10 225
10 230
10 235
10 244
10 249
10 254
10 268
10 276
10 285
10 289
10 294
10 302
10 312
10 313
10 316
10 322
10 332
10 350
10 360
10 364
10 372
10 373
10 384
10 393
10 394
10 396
10 399
10 405
10 416
10 424
10 426
10 433
10 457
10 463
10 467
10 476
10 477
10 489
10 495
10 514
10 519
10 522
10 526
10 528
10 530
10 534
10 547
10 553
10 576
10 589
10 605
10 614
10 617
10 624
10 634
10 637
10 640
10 651
10 661
10 724
10 740
10 751
10 760
10 762
10 764
10 776
10 781
10 785
10 809
10 831
10 848
10 879
10 949
10 952
10 966
10 971
10 981
10 987
10 1006
10 1026
10 1059
10 1069
10 1091
10 1098
10 1112
10 1122
10 1123
10 1134
10 1141
10 1161
10 1170
10 1185
10 1223
10 1238
10 1259
10 1264
10 1289
10 1298
10 1313
10 1326
10 1367
10 1380
10 1409
10 1432
10 1448
10 1454
10 1474
10 1482
10 1495
10 1508
10 1514
10 1552
10 1562
10 1568
10 1570
10 1581
10 1626
10 1631
10 1655
10 1659
10 1702
10 1703
10 1712
10 1717
10 1746
10 1752
10 1756
10 1768
10 1770
10 1772
10 1773
10 1779
10 1781
10 1782
10 1818
10 1827
10 1828
10 1853
10 1859
10 1881
10 1888
10 1897
10 1959
10 1974
10 1975
10 2029
10 2045
10 2093
10 2099
10 2123
10 2138
10 2157
10 2180
10 2181
10 2272
10 2275
10 2308
10 2318
10 2322
10 2398
10 2405
10 2418
10 2470
10 2483
10 2491
10 2498
10 2503
10 2507
10 2520
10 2541
10 2552
10 2567
10 2631
10 2649
10 2655
10 2661
10 2673
10 2682
10 2717
10 2721
10 2758
10 2808
10 2811
10 2821
10 2825
10 2841
10 2858
10 2873
10 2887
10 2895
10 2918
10 2923
10 2953
10 2974
10 2984
10 3010
10 3013
10 3043
10 3054
10 3098
10 3121
10 3124
10 3139
10 3178
10 3190
10 3192
10 3208
10 3212
10 3218
10 3228
10 3248
10 3261
10 3286
10 3308
10 3327
10 3365
10 3429
10 3436
10 3441
10 3442
10 3443
10 3463
10 3482
10 3500
10 3505
10 3512
10 3519
10 3528
10 3553
10 3616
10 3632
10 3669
10 3687
10 3693
10 3777
10 3786
10 3798
10 3799
10 3838
10 3845
10 3873
10 3886
10 3890
10 3920
10 3934
10 3936
10 3958
10 3961
10 3993
10 4003
10 4057
10 4075
10 4132
10 4134
10 4142
10 4157
10 4163
10 4221
10 4255
10 4279
10 4289
10 4396
10 4449
10 4453
10 4462
10 4503
10 4543
10 4588
10 4594
10 4662
10 4672
10 4677
10 4728
10 4761
10 4778
10 4791
10 4826
10 4884
10 4923
11 0
11 1
11 2
11 3
11 4
11 5
11 6
11 7
11 8
11 9
11 10
11 12
11 13
11 14
11 15
11 16
11 17
11 18
11 19
11 20
11 22
11 24
11 25
11 26
11 29
11 30
11 38
11 40
11 41
11 44
11 47
11 70
11 90
11 91
11 96
11 119
11 125
11 131
11 145
11 147
11 170
11 176
11 184
11 186
11 218
11 223
11 265
11 268
11 275
11 300
11 301
11 318
11 323
11 333
11 334
11 351
11 358
11 362
11 364
11 372
11 374
11 383
11 401
11 411
11 425
11 458
11 484
11 543
11 550
11 571
11 579
11 581
11 593
11 621
11 623
11 625
11 742
11 748
11 750
11 807
11 847
11 867
11 892
11 921
11 928
11 937
11 939
11 954
11 997
11 1006
11 1009
11 1050
11 1062
11 1065
11 1088
11 1109
11 1121
11 1241
11 1245
11 1291
11 1298
11 1374
11 1391
11 1398
11 1423
11 1425
11 1448
11 1457
11 1494
11 1495
11 1582
11 1603
11 1613
11 1634
11 1653
11 1667
11 1720
11 1740
11 1771
11 1852
11 1863
11 1876
11 1906
11 1928
11 1969
11 2011
11 2029
11 2033
11 2070
11 2074
11 2118
11 2136
11 2163
11 2168
11 2184
11 2297
11 2373
11 2425
11 2449
11 2474
11 2475
11 2479
11 2489
11 2508
11 2550
11 2658
11 2671
11 2673
11 2695
11 2699
11 2722
11 2817
11 2831
11 2868
11 2886
11 2903
11 3010
11 3015
11 3066
11 3112
11 3132
11 3145
11 3167
11 3229
11 3318
11 3342
11 3435
11 3444
11 3450
11 3505
11 3699
11 3727
11 3790
11 3900
11 3976
11 4014
11 4018
11 4082
11 4085
11 4096
11 4116
11 4136
11 4282
11 4310
11 4350
11 4377
11 4430
11 4539
11 4589
11 4596
11 4615
11 4639
11 4640
11 4641
11 4642
11 4679
11 4755
11 4788
11 4792
11 4806
11 4815
11 4820
11 4837
11 4872
11 4898
11 4914
11 4934
11 4940
12 0
12 1
12 2
12 3
12 4
12 5
12 6
12 7
12 8
12 9
12 10
12 11
12 13
12 14
12 15
12 16
12 17
12 18
12 19
12 20
12 21
12 22
12 23
12 24
12 27
12 31
12 32
12 37
12 45
12 48
12 50
12 58
12 65
12 67
12 68
12 69
12 73
12 74
12 78
12 83
12 89
12 95
12 97
12 99
12 100
12 113
12 118
12 120
12 121
12 122
12 126
12 134
12 155
12 164
12 181
12 182
12 185
12 189
12 190
12 191
12 198
12 201
12 204
12 213
12 214
12 218
12 224
12 233
12 241
12 242
12 250
12 282
12 295
12 311
12 327
12 368
12 404
12 408
12 412
12 440
12 466
12 488
12 531
12 536
12 547
12 551
12 559
12 560
12 563
12 569
12 571
12 575
12 577
12 590
12 595
12 609
12 622
12 642
12 672
12 674
12 679
12 683
12 710
12 719
12 727
12 746
12 751
12 758
12 770
12 773
12 787
12 820
12 842
12 856
12 870
12 892
12 996
12 1012
12 1021
12 1024
12 1025
12 1033
12 1037
12 1052
12 1056
12 1059
12 1067
12 1071
12 1085
12 1096
12 1130
12 1148
12 1210
12 1214
12 1243
12 1264
12 1280
12 1282
12 1314
12 1319
12 1320
12 1325
12 1331
12 1344
12 1369
12 1413
12 1456
12 1480
12 1502
12 1508
12 1533
12 1542
12 1570
12 1577
12 1603
12 1624
12 1670
12 1684
12 1697
12 1701
12 1714
12 1715
12 1721
12 1730
12 1731
12 1753
12 1756
12 1788
12 1791
12 1836
12 1874
12 1875
12 1878
12 1934
12 1953
12 1991
12 1998
12 2003
12 2013
12 2092
12 2103
12 2132
12 2162
12 2207
12 2209
12 2212
12 2223
12 2264
12 2274
12 2279
12 2333
12 2335
12 2343
12 2345
12 2375
12 2393
12 2401
12 2444
12 2453
12 2467
12 2468
12 2507
12 2523
12 2535
12 2559
12 2646
12 2660
12 2683
12 2687
12 2739
12 2768
12 2804
12 2806
12 2854
12 2865
12 2884
12 2963
12 3000
12 3004
12 3065
12 3073
12 3078
12 3144
12 3198
12 3227
12 3263
12 3333
12 3415
12 3431
12 3434
12 3453
12 3467
12 3477
12 3478
12 3480
12 3515
12 3586
12 3647
12 3679
12 3692
12 3761
12 3807
12 3817
12 3838
12 3840
12 3843
12 3847
12 3886
12 3907
12 3966
12 3989
12 4021
12 4031
12 4129
12 4133
12 4138
12 4149
12 4169
12 4175
12 4206
12 4225
12 4228
12 4269
12 4283
12 4295
12 4306
12 4338
12 4354
12 4377
12 4421
12 4454
12 4467
12 4491
12 4507
12 4606
12 4693
12 4696
12 4728
12 4729
12 4806
12 4814
12 4819
13 0
13 1
13 2
13 3
13 4
13 5
13 6
13 7
13 8
13 9
13 10
13 11
13 12
13 14
13 15
13 16
13 17
13 18
13 19
13 22
13 24
13 36
13 39
13 40
13 53
13 59
13 60
13 82
13 92
13 100
13 105
13 122
13 131
13 153
13 161
13 168
13 177
13 205
13 213
13 229
13 230
13 248
13 262
13 267
13 284
13 321
13 349
13 354
13 357
13 368
13 391
13 406
13 441
13 446
13 475
13 485
13 515
13 543
13 552
13 564
13 569
13 605
13 617
13 629
13 651
13 653
13 678
13 701
13 715
13 724
13 739
13 793
13 816
13 831
13 847
13 868
13 940
13 952
13 956
13 1006
13 1045
13 1052
13 1061
13 1075
13 1135
13 1146
13 1155
13 1228
13 1247
13 1279
13 1289
13 1431
13 1466
13 1468
13 1510
13 1569
13 1602
13 1640
13 1663
13 1668
13 1752
13 1755
13 1761
13 1778
13 1787
13 1791
13 1799
13 1814
13 1821
13 1849
13 1855
13 1888
13 1953
13 2039
13 2081
13 2093
13 2105
13 2127
13 2133
13 2156
13 2219
13 2234
13 2247
13 2332
13 2333
13 2346
13 2351
13 2371
13 2409
13 2440
13 2503
13 2536
13 2655
13 2675
13 2717
13 2733
13 2830
13 2842
13 2912
13 3035
13 3051
13 3121
13 3227
13 3241
13 3247
13 3285
13 3353
13 3365
13 3383
13 3432
13 3437
13 3448
13 3465
13 3480
13 3571
13 3762
13 3816
13 3830
13 3883
13 3991
13 4017
13 4028
13 4072
13 4183
13 4206
13 4219
13 4277
13 4283
13 4360
13 4511
13 4518
13 4707
13 4797
13 4807
13 4894
13 4896
13 4927
13 4938
13 4954
14 0
14 1
14 2
14 3
14 4
14 5
14 6
14 7
14 8
14 9
14 10
14 11
14 12
14 13
14 15
14 16
14 17
14 18
14 19
14 23
14 24
14 32
14 35
14 36
14 41
14 42
14 46
14 47
14 52
14 53
14 57
14 59
14 63
14 65
14 66
14 68
14 70
14 78
14 79
14 89
14 90
14 101
14 102
14 111
14 136
14 141
14 144
14 153
14 165
14 166
14 175
14 181
14 182
14 184
14 187
14 191
14 194
14 196
14 198
14 199
14 211
14 226
14 228
14 233
14 239
14 242
14 261
14 273
14 274
14 291
14 322
14 326
14 338
14 345
14 360
14 365
14 379
14 392
14 415
14 419
14 438
14 446
14 458
14 472
14 479
14 481
14 505
14 508
14 512
14 514
14 524
14 525
14 540
14 545
14 565
14 582
14 586
14 590
14 604
14 605
14 611
14 623
14 630
14 631
14 646
14 651
14 654
14 669
14 672
14 675
14 711
14 728
14 746
14 770
14 775
14 779
14 816
14 822
14 823
14 829
14 843
14 850
14 853
14 879
14 886
14 892
14 908
14 909
14 912
14 922
14 924
14 945
14 951
14 954
14 972
14 989
14 1013
14 1050
14 1055
14 1078
14 1083
14 1091
14 1113
14 1125
14 1129
14 1132
14 1141
14 1143
14 1148
14 1178
14 1182
14 1184
14 1193
14 1200
14 1205
14 1206
14 1216
14 1222
14 1231
14 1257
14 1286
14 1312
14 1322
14 1324
14 1373
14 1398
14 1399
14 1437
14 1473
14 1476
14 1479
14 1516
14 1521
14 1541
14 1543
14 1568
14 1580
14 1596
14 1627
14 1655
14 1657
14 1664
14 1665
14 1696
14 1709
14 1719
14 1741
14 1768
14 1785
14 1794
14 1845
14 1847
14 1867
14 1888
14 1902
14 1909
14 1910
14 1947
14 1950
14 1960
14 1996
14 2039
14 2058
14 2065
14 2075
14 2088
14 2096
14 2102
14 2121
14 2129
14 2174
14 2177
14 2329
14 2344
14 2360
14 2454
14 2456
14 2474
14 2492
14 2500
14 2505
14 2506
14 2543
14 2551
14 2554
14 2590
14 2622
14 2646
14 2672
14 2689
14 2690
14 2697
14 2748
14 2860
14 2866
14 2870
14 2874
14 2882
14 2883
14 2945
14 2972
14 2977
14 3009
14 3019
14 3035
14 3094
14 3109
14 3133
14 3142
14 3164
14 3178
14 3219
14 3320
14 3325
14 3367
14 3386
14 3435
14 3467
14 3479
14 3503
14 3523
14 3532
14 3568
14 3579
14 3581
14 3614
14 3615
14 3661
14 3688
14 3706
14 3731
14 3752
14 3797
14 3832
14 3873
14 3901
14 3922
14 3941
14 3982
14 4020
14 4046
14 4047
14 4087
14 4091
14 4115
14 4120
14 4138
14 4157
14 4162
14 4196
14 4200
14 4234
14 4279
14 4308
14 4318
14 4328
14 4380
14 4384
14 4500
14 4507
14 4534
14 4573
14 4577
14 4601
14 4628
14 4675
14 4709
14 4782
14 4841
14 4864
14 4887
14 4894
14 4973
14 4974
14 4980
14 4987
14 4990
14 4997
15 0
15 1
15 2
15 3
15 4
15 5
15 6
15 7
15 8
15 9
15 10
15 11
15 12
15 13
15 14
15 16
15 17
15 18
15 19
15 25
15 35
15 51
15 70
15 86
15 94
15 128
15 148
15 155
15 166
15 170
15 179
15 184
15 187
15 192
15 204
15 207
15 210
15 245
15 261
15 269
15 289
15 291
15 298
15 334
15 335
15 356
15 386
15 390
15 391
15 413
15 505
15 545
15 558
15 567
15 578
15 583
15 597
15 632
15 683
15 719
15 720
15 782
15 785
15 807
15 811
15 821
15 863
15 882
15 960
15 1018
15 1052
15 1067
15 1075
15 1094
15 1132
15 1158
15 1161
15 1191
15 1196
15 1219
15 1224
15 1233
15 1236
15 1265
15 1272
15 1295
15 1393
15 1493
15 1540
15 1546
15 1625
15 1747
15 1771
15 1777
15 1835
15 1838
15 1892
15 1975
15 2023
15 2072
15 2075
15 2100
15 2104
15 2125
15 2137
15 2165
15 2243
15 2285
15 2317
15 2322
15 2419
15 2434
15 2545
15 2560
15 2604
15 2641
15 2664
15 2731
15 2757
15 2870
15 2883
15 3004
15 3016
15 3154
15 3171
15 3289
15 3382
15 3387
15 3389
15 3594
15 3631
15 3655
15 3659
15 3666
15 3694
15 3696
15 3711
15 3736
15 3767
15 3816
15 3827
15 3869
15 3872
15 3983
15 4209
15 4239
15 4358
15 4479
15 4504
15 4554
15 4780
15 4819
15 4835
15 4836
15 4848
15 4873
15 4982
16 0
16 1
16 2
16 3
16 4
16 5
16 6
16 7
16 8
16 9
16 10
16 11
16 12
16 13
16 14
16 15
16 17
16 18
16 19
16 20
16 24
16 25
16 26
16 27
16 28
16 29
16 30
16 33
16 37
16 40
16 41
16 43
16 44
16 45
16 48
16 54
16 55
16 62
16 64
16 67
16 75
16 76
16 86
16 87
16 88
16 93
16 101
16 104
16 105
16 116
16 119
16 135
16 138
16 159
16 167
16 173
16 176
16 177
16 179
16 188
16 203
16 232
16 243
16 244
16 268
16 270
16 271
16 274
16 280
16 282
16 283
16 287
16 290
16 295
16 297
16 298
16 305
16 310
16 333
16 337
16 350
16 380
16 387
16 397
16 400
16 414
16 421
16 435
16 441
16 450
16 451
16 461
16 464
16 479
16 487
16 533
16 555
16 556
16 582
16 584
16 587
16 598
16 626
16 676
16 704
16 720
16 750
16 788
16 805
16 807
16 823
16 850
16 851
16 852
16 855
16 863
16 901
16 910
16 912
16 916
16 944
16 958
16 978
16 994
16 1009
16 1040
16 1041
16 1049
16 1062
16 1068
16 1088
16 1097
16 1099
16 1116
16 1126
16 1144
16 1151
16 1179
16 1252
16 1273
16 1310
16 1429
16 1461
16 1488
16 1504
16 1510
16 1530
16 1538
16 1559
16 1644
16 1647
16 1665
16 1698
16 1717
16 1751
16 1761
16 1766
16 1772
16 1791
16 1804
16 1815
16 1850
16 1861
16 1871
16 1885
16 1911
16 1918
16 1976
16 1992
16 2013
16 2049
16 2058
16 2063
16 2085
16 2086
16 2088
16 2101
16 2137
16 2140
16 2164
16 2172
16 2247
16 2250
16 2262
16 2298
16 2309
16 2346
16 2358
16 2360
16 2399
16 2404
16 2428
16 2446
16 2452
16 2474
16 2479
16 2509
16 2515
16 2580
16 2691
16 2701
16 2723
16 2732
16 2741
16 2743
16 2751
16 2776
16 2818
16 2829
16 2852
16 2925
16 2939
16 2956
16 2968
16 3006
16 3017
16 3025
16 3034
16 3057
16 3111
16 3135
16 3156
16 3163
16 3172
16 3235
16 3239
16 3242
16 3346
16 3366
16 3399
16 3400
16 3421
16 3428
16 3487
16 3512
16 3524
16 3528
16 3560
16 3574
16 3576
16 3591
16 3596
16 3614
16 3619
16 3663
16 3737
16 3770
16 3843
16 3880
16 3889
16 3914
16 3916
16 3925
16 3943
16 3965
16 3980
16 4006
16 4011
16 4104
16 4105
16 4136
16 4140
16 4151
16 4159
16 4175
16 4177
16 4195
16 4223
16 4325
16 4351
16 4361
16 4362
16 4426
16 4451
16 4478
16 4491
16 4503
16 4527
16 4528
16 4555
16 4613
16 4642
16 4647
16 4665
16 4679
16 4692
16 4775
16 4796
16 4827
16 4841
16 4868
16 4888
16 4952
16 4980
17 0
17 1
17 2
17 3
17 4
17 5
17 6
17 7
17 8
17 9
17 10
17 11
17 12
17 13
17 14
17 15
17 16
17 18
17 19
17 20
17 21
17 22
17 24
17 25
17 31
17 32
17 35
17 36
17 52
17 54
17 66
17 71
17 75
17 76
17 78
17 79
17 80
17 85
17 86
17 99
17 100
17 101
17 115
17 117
17 134
17 136
17 143
17 148
17 152
17 158
17 163
17 166
17 172
17 177
17 199
17 202
17 205
17 220
17 228
17 231
17 232
17 252
17 253
17 270
17 272
17 273
17 287
17 292
17 306
17 325
17 330
17 333
17 336
17 341
17 346
17 348
17 350
17 351
17 364
17 367
17 390
17 406
17 419
17 431
17 434
17 440
17 442
17 443
17 446
17 458
17 460
17 468
17 473
17 488
17 518
17 536
17 566
17 621
17 628
17 639
17 649
17 653
17 656
17 666
17 669
17 676
17 688
17 691
17 707
17 718
17 751
17 754
17 782
17 816
17 830
17 840
17 945
17 956
17 966
17 979
17 988
17 994
17 1015
17 1020
17 1033
17 1035
17 1039
17 1052
17 1065
17 1113
17 1121
17 1145
17 1177
17 1179
17 1192
17 1207
17 1209
17 1215
17 1221
17 1228
17 1240
17 1263
17 1292
17 1296
17 1300
17 1309
17 1317
17 1323
17 1344
17 1354
17 1375
17 1376
17 1381
17 1394
17 1395
17 1476
17 1494
17 1510
17 1524
17 1526
17 1540
17 1574
17 1575
17 1578
17 1587
17 1590
17 1614
17 1653
17 1656
17 1672
17 1711
17 1721
17 1740
17 1743
17 1756
17 1783
17 1824
17 1834
17 1844
17 1857
17 1874
17 1875
17 1881
17 1891
17 1893
17 1905
17 1911
17 1942
17 1959
17 1986
17 1987
17 2004
17 2014
17 2018
17 2052
17 2058
17 2084
17 2091
17 2106
17 2123
17 2130
17 2165
17 2202
17 2204
17 2206
17 2218
17 2223
17 2229
17 2230
17 2231
17 2236
17 2256
17 2263
17 2282
17 2283
17 2321
17 2378
17 2381
17 2388
17 2440
17 2449
17 2451
17 2482
17 2598
17 2622
17 2657
17 2670
17 2700
17 2772
17 2774
17 2790
17 2832
17 2863
17 2942
17 2958
17 2964
17 2988
17 2992
17 3014
17 3015
17 3044
17 3074
17 3084
17 3177
17 3207
17 3219
17 3220
17 3239
17 3250
17 3258
17 3260
17 3281
17 3283
17 3321
17 3328
17 3341
17 3371
17 3415
17 3431
17 3470
17 3471
17 3494
17 3500
17 3516
17 3538
17 3560
17 3561
17 3563
17 3565
17 3577
17 3583
17 3589
17 3598
17 3627
17 3656
17 3674
17 3687
17 3713
17 3742
17 3779
17 3858
17 3893
17 4005
17 4006
17 4092
17 4107
17 4163
17 4178
17 4237
17 4279
17 4333
17 4398
17 4463
17 4484
17 4507
17 4516
17 4541
17 4598
17 4627
17 4629
17 4653
17 4680
17 4713
17 4748
17 4776
17 4782
17 4788
17 4799
17 4817
17 4838
17 4842
17 4921
18 0
18 1
18 2
18 3
18 4
18 5
18 6
18 7
18 8
18 9
18 10
18 11
18 12
18 13
18 14
18 15
18 16
18 17
18 19
18 21
18 28
18 35
18 42
18 43
18 48
18 56
18 57
18 58
18 71
18 72
18 93
18 114
18 129
18 133
18 145
18 149
18 154
18 160
18 164
18 214
18 232
18 234
18 260
18 262
18 272
18 273
18 283
18 300
18 307
18 310
18 314
18 325
18 337
18 348
18 370
18 374
18 381
18 403
18 473
18 487
18 500
18 507
18 511
18 514
18 537
18 551
18 560
18 563
18 568
18 570
18 603
18 629
18 632
18 637
18 653
18 695
18 725
18 742
18 743
18 803
18 811
18 818
18 824
18 830
18 833
18 837
18 841
18 851
18 862
18 879
18 892
18 900
18 903
18 918
18 934
18 935
18 943
18 953
18 981
18 983
18 999
18 1010
18 1054
18 1057
18 1059
18 1171
18 1172
18 1179
18 1180
18 1181
18 1199
18 1202
18 1205
18 1207
18 1232
18 1253
18 1269
18 1277
18 1317
18 1347
18 1388
18 1395
18 1408
18 1429
18 1491
18 1510
18 1515
18 1520
18 1530
18 1545
18 1572
18 1576
18 1579
18 1587
18 1608
18 1647
18 1677
18 1753
18 1811
18 1837
18 1843
18 1850
18 1885
18 1903
18 1986
18 2068
18 2187
18 2232
18 2241
18 2266
18 2303
18 2304
18 2312
18 2313
18 2319
18 2324
18 2427
18 2430
18 2437
18 2461
18 2505
18 2545
18 2564
18 2568
18 2588
18 2593
18 2631
18 2660
18 2662
18 2691
18 2698
18 2725
18 2735
18 2767
18 2770
18 2787
18 2802
18 2816
18 2835
18 2887
18 2895
18 2906
18 2907
18 2927
18 2940
18 2955
18 2976
18 2983
18 3023
18 3078
18 3088
18 3121
18 3159
18 3176
18 3186
18 3218
18 3222
18 3234
18 3256
18 3258
18 3323
18 3341
18 3348
18 3356
18 3364
18 3373
18 3387
18 3406
18 3422
18 3527
18 3535
18 3578
18 3583
18 3586
18 3619
18 3630
18 3641
18 3724
18 3752
18 3788
18 3810
18 3835
18 3858
18 3937
18 3956
18 3965
18 3973
18 3987
18 3993
18 4008
18 4014
18 4017
18 4031
18 4063
18 4108
18 4111
18 4123
18 4240
18 4242
18 4285
18 4327
18 4328
18 4342
18 4418
18 4452
18 4467
18 4481
18 4501
18 4508
18 4552
18 4576
18 4587
18 4611
18 4625
18 4676
18 4705
18 4744
18 4769
18 4809
18 4816
18 4842
18 4858
18 4943
18 4972
19 0
19 1
19 2
19 3
19 4
19 5
19 6
19 7
19 8
19 9
19 10
19 11
19 12
19 13
19 14
19 15
19 16
19 17
19 18
19 23
19 25
19 26
19 27
19 30
19 32
19 34
19 35
19 51
19 64
19 66
19 77
19 88
19 89
19 91
19 106
19 110
19 114
19 117
19 132
19 134
19 137
19 139
19 154
19 179
19 180
19 192
19 202
19 216
19 268
19 278
19 336
19 350
19 369
19 391
19 432
19 459
19 473
19 485
19 500
19 513
19 525
19 528
19 530
19 540
19 549
19 558
19 561
19 565
19 576
19 589
19 613
19 620
19 629
19 633
19 651
19 656
19 666
19 700
19 701
19 711
19 713
19 716
19 745
19 794
19 829
19 868
19 881
19 929
19 940
19 968
19 972
19 984
19 997
19 1053
19 1101
19 1105
19 1118
19 1119
19 1140
19 1164
19 1169
19 1189
19 1215
19 1217
19 1231
19 1239
19 1241
19 1244
19 1260
19 1294
19 1308
19 1313
19 1322
19 1328
19 1373
19 1380
19 1423
19 1428
19 1429
19 1506
19 1543
19 1593
19 1616
19 1617
19 1622
19 1623
19 1663
19 1713
19 1740
19 1746
19 1774
19 1775
19 1804
19 1819
19 1894
19 1936
19 1955
19 1967
19 1976
19 1979
19 2013
19 2018
19 2019
19 2070
19 2076
19 2078
19 2239
19 2266
19 2282
19 2291
19 2295
19 2312
19 2384
19 2407
19 2478
19 2531
19 2536
19 2545
19 2553
19 2559
19 2625
19 2695
19 2731
19 2744
19 2778
19 2797
19 2824
19 2893
19 2905
19 2944
19 2950
19 2951
19 2982
19 3001
19 3020
19 3022
19 3044
19 3082
19 3172
19 3203
19 3278
19 3302
19 3315
19 3325
19 3388
19 3424
19 3441
19 3471
19 3473
19 3499
19 3505
19 3519
19 3631
19 3663
19 3673
19 3708
19 3721
19 3742
19 3745
19 3790
19 3862
19 3922
19 3964
19 4014
19 4080
19 4226
19 4266
19 4278
19 4337
19 4385
19 4416
19 4455
19 4470
19 4520
19 4547
19 4616
19 4628
19 4645
19 4662
19 4663
19 4680
19 4761
19 4764
19 4773
19 4781
19 4795
19 4803
19 4862
19 4893
19 4925
19 4931
19 4946
19 4973
19 4985
20 2
20 4
20 6
20 9
20 11
20 12
20 16
20 17
20 23
20 39
20 104
20 108
20 122
20 138
20 146
20 198
20 258
20 408
20 483
20 487
20 512
20 562
20 595
20 648
20 679
20 859
20 882
20 947
20 1002
20 1005
20 1034
20 1072
20 1190
20 1369
20 1378
20 1387
20 1417
20 1469
20 1543
20 1557
20 1620
20 1642
20 1644
20 1727
20 1758
20 1798
20 2181
20 2269
20 2305
20 2379
20 2401
20 2409
20 2709
20 2766
20 2776
20 3149
20 3216
20 3341
20 3389
20 3415
20 3595
20 3699
20 3766
20 3928
20 3950
20 4172
20 4238
20 4239
20 4660
20 4692
20 4777
20 4921
21 1
21 2
21 3
21 4
21 7
21 10
21 12
21 17
21 18
21 22
21 25
21 38
21 41
21 57
21 60
21 74
21 79
21 80
21 84
21 86
21 103
21 104
21 121
21 123
21 130
21 159
21 160
21 161
21 171
21 172
21 197
21 210
21 226
21 233
21 255
21 260
21 280
21 317
21 347
21 364
21 446
21 451
21 476
21 497
21 503
21 537
21 561
21 564
21 568
21 576
21 596
21 721
21 740
21 761
21 774
21 777
21 823
21 861
21 882
21 888
21 918
21 921
21 1008
21 1026
21 1038
21 1040
21 1077
21 1135
21 1214
21 1288
21 1295
21 1324
21 1355
21 1365
21 1368
21 1405
21 1421
21 1471
21 1556
21 1644
21 1682
21 1704
21 1732
21 1742
21 1802
21 1807
21 1824
21 1837
21 1856
21 1886
21 1924
21 1930
21 1945
21 1955
21 2095
21 2096
21 2143
21 2168
21 2192
21 2212
21 2279
21 2291
21 2308
21 2311
21 2335
21 2356
21 2367
21 2385
21 2412
21 2516
21 2567
21 2595
21 2678
21 2682
21 2706
21 2772
21 2866
21 2971
21 3081
21 3113
21 3130
21 3258
21 3274
21 3343
21 3409
21 3420
21 3477
21 3543
21 3571
21 3594
21 3625
21 3683
21 3686
21 3699
21 3828
21 3856
21 3920
21 4024
21 4037
21 4061
21 4195
21 4214
21 4260
21 4312
21 4347
21 4483
21 4535
21 4618
21 4685
21 4776
21 4833
22 1
22 2
22 4
22 5
22 11
22 12
22 13
22 17
22 21
22 30
22 35
22 97
22 120
22 130
22 135
22 258
22 264
22 276
22 311
22 322
22 361
22 402
22 410
22 412
22 438
22 472
22 478
22 490
22 520
22 570
22 589
22 602
22 618
22 655
22 700
22 795
22 815
22 894
22 1018
22 1075
22 1104
22 1118
22 1119
22 1181
22 1369
22 1429
22 1477
22 1522
22 1537
22 1590
22 1633
22 1664
22 1724
22 1733
22 1739
22 1835
22 1846
22 1905
22 1913
22 1920
22 2015
22 2190
22 2206
22 2271
22 2297
22 2311
22 2370
22 2406
22 2429
22 2437
22 2559
22 2608
22 2637
22 2734
22 2811
22 3180
22 3226
22 3278
22 3391
22 3513
22 3630
22 3638
22 3791
22 3792
22 4046
22 4168
22 4270
22 4337
22 4352
22 4407
22 4430
22 4442
22 4612
22 4678
22 4796
22 4884
22 4933
23 0
23 1
23 3
23 7
23 8
23 9
23 10
23 12
23 14
23 19
23 20
23 28
23 33
23 42
23 44
23 57
23 64
23 71
23 75
23 90
23 102
23 144
23 147
23 164
23 193
23 194
23 200
23 207
23 215
23 236
23 237
23 326
23 337
23 343
23 352
23 382
23 416
23 421
23 428
23 599
23 600
23 607
23 639
23 669
23 674
23 759
23 824
23 825
23 882
23 902
23 1069
23 1168
23 1235
23 1257
23 1335
23 1346
23 1369
23 1372
23 1494
23 1535
23 1548
23 1589
23 1604
23 1649
23 1663
23 1734
23 1749
23 1873
23 1883
23 1901
23 1996
23 2050
23 2182
23 2188
23 2276
23 2280
23 2321
23 2373
23 2543
23 2585
23 2716
23 2768
23 2787
23 2803
23 2810
23 2836
23 2935
23 2939
23 2972
23 2996
23 3020
23 3153
23 3180
23 3225
23 3272
23 3518
23 3619
23 3622
23 3634
23 3724
23 3978
23 4014
23 4042
23 4369
23 4385
23 4394
23 4488
23 4665
23 4720
23 4771
23 4785
23 4786
23 4877
23 4884
23 4885
24 0
24 1
24 11
24 12
24 13
24 14
24 16
24 17
24 30
24 32
24 37
24 38
24 45
24 47
24 75
24 85
24 104
24 106
24 111
24 142
24 148
24 150
24 169
24 195
24 224
24 320
24 372
24 471
24 500
24 587
24 694
24 703
24 746
24 757
24 799
24 862
24 947
24 988
24 1039
24 1080
24 1118
24 1294
24 1312
24 1612
24 1624
24 1652
24 1655
24 1717
24 1755
24 1761
24 1998
24 2040
24 2157
24 2166
24 2204
24 2400
24 2597
24 2649
24 2656
24 2751
24 2753
24 2873
24 2881
24 2922
24 3320
24 3498
24 3782
24 3935
24 3979
24 4031
24 4113
24 4304
24 4511
24 4723
24 4902
24 4923
24 4937
25 0
25 2
25 3
25 4
25 5
25 11
25 15
25 16
25 17
25 19
25 21
25 28
25 30
25 54
25 58
25 63
25 71
25 112
25 123
25 138
25 172
25 178
25 181
25 212
25 217
25 218
25 231
25 257
25 267
25 281
25 282
25 310
25 321
25 382
25 407
25 461
25 469
25 471
25 476
25 482
25 483
25 496
25 502
25 519
25 533
25 577
25 653
25 667
25 686
25 725
25 755
25 789
25 803
25 806
25 817
25 905
25 927
25 980
25 981
25 1003
25 1009
25 1011
25 1013
25 1015
25 1024
25 1025
25 1049
25 1133
25 1151
25 1153
25 1195
25 1196
25 1217
25 1315
25 1426
25 1458
25 1464
25 1557
25 1856
25 1903
25 1908
25 2042
25 2052
25 2112
25 2140
25 2197
25 2203
25 2227
25 2243
25 2268
25 2340
25 2478
25 2483
25 2497
25 2573
25 2584
25 2621
25 2637
25 2685
25 2717
25 2736
25 2784
25 2805
25 2839
25 2841
25 2853
25 2871
25 2890
25 2936
25 2941
25 3053
25 3067
25 3071
25 3106
25 3254
25 3277
25 3332
25 3372
25 3415
25 3534
25 3539
25 3545
25 3644
25 3762
25 3793
25 4034
25 4203
25 4206
25 4305
25 4339
25 4346
25 4354
25 4510
25 4521
25 4708
25 4732
25 4867
25 4925
25 4966
26 4
26 5
26 6
26 10
26 11
26 16
26 19
26 38
26 53
26 73
26 80
26 99
26 236
26 281
26 337
26 354
26 621
26 747
26 760
26 811
26 827
26 967
26 1019
26 1052
26 1067
26 1135
26 1189
26 1437
26 1766
26 1788
26 1911
26 2007
26 2168
26 2430
26 2631
26 2876
26 2878
26 2987
26 3090
26 3144
26 3150
26 3173
26 3398
26 3399
26 3419
26 3432
26 3653
26 3886
26 3905
26 4095
26 4131
26 4216
26 4238
26 4289
26 4783
26 4876
27 2
27 4
27 6
27 7
27 9
27 12
27 16
27 19
27 38
27 41
27 47
27 57
27 59
27 77
27 106
27 113
27 146
27 149
27 159
27 251
27 256
27 264
27 288
27 305
27 328
27 341
27 360
27 362
27 368
27 374
27 386
27 397
27 467
27 493
27 577
27 584
27 626
27 637
27 691
27 711
27 712
27 729
27 732
27 745
27 751
27 770
27 783
27 803
27 834
27 854
27 883
27 913
27 980
27 1030
27 1065
27 1112
27 1115
27 1122
27 1142
27 1214
27 1237
27 1258
27 1278
27 1307
27 1343
27 1357
27 1389
27 1401
27 1428
27 1444
27 1577
27 1598
27 1612
27 1635
27 1642
27 1654
27 1655
27 1690
27 1721
27 1777
27 1784
27 1788
27 1807
27 1888
27 2023
27 2084
27 2097
27 2158
27 2187
27 2196
27 2197
27 2204
27 2205
27 2273
27 2286
27 2329
27 2345
27 2371
27 2418
27 2422
27 2456
27 2465
27 2488
27 2521
27 2660
27 2676
27 2723
27 2818
27 2836
27 2883
27 2946
27 3017
27 3023
27 3075
27 3162
27 3201
27 3441
27 3461
27 3474
27 3519
27 3530
27 3543
27 3590
27 3640
27 3872
27 4000
27 4048
27 4073
27 4088
27 4105
27 4117
27 4183
27 4299
27 4359
27 4388
27 4421
27 4554
27 4644
27 4733
27 4801
27 4810
27 4835
27 4868
27 4943
28 0
28 1
28 2
28 4
28 8
28 10
28 16
28 18
28 23
28 25
28 43
28 56
28 78
28 84
28 110
28 121
28 183
28 187
28 231
28 282
28 366
28 409
28 456
28 499
28 518
28 634
28 686
28 743
28 812
28 998
28 1031
28 1044
28 1086
28 1195
28 1270
28 1410
28 1654
28 1873
28 2238
28 2313
28 2443
28 2535
28 2541
28 2612
28 2730
28 2793
28 2817
28 2844
28 2946
28 2988
28 3041
28 3587
28 3658
28 3733
28 3734
28 3976
28 3997
28 4558
28 4747
28 4805
28 4882
28 4903
28 4979
29 1
29 2
29 9
29 11
29 16
29 51
29 128
29 139
29 151
29 195
29 246
29 269
29 347
29 348
29 404
29 465
29 537
29 570
29 773
29 782
29 791
29 798
29 825
29 867
29 1039
29 1053
29 1060
29 1063
29 1144
29 1176
29 1283
29 1299
29 1338
29 1351
29 1551
29 1554
29 1794
29 1802
29 1937
29 2128
29 2236
29 2538
29 2569
29 2646
29 2663
29 2830
29 2893
29 2919
29 3279
29 3335
29 3426
29 3532
29 3536
29 3647
29 3995
29 4122
29 4182
30 1
30 7
30 10
30 11
30 16
30 19
30 22
30 24
30 25
30 33
30 47
30 118
30 185
30 186
30 240
30 356
30 393
30 414
30 431
30 550
30 577
30 677
30 742
30 747
30 892
30 916
30 1036
30 1192
30 1246
30 1295
30 1341
30 1365
30 1505
30 1540
30 1652
30 1778
30 1783
30 1880
30 1901
30 1988
30 2253
30 2292
30 2322
30 2404
30 2436
30 2513
30 2946
30 3157
30 3504
30 3570
30 3585
30 3587
30 3740
30 3970
30 4022
30 4217
30 4523
30 4688
30 4696
30 4951
30 4981
31 0
31 2
31 5
31 6
31 8
31 10
31 12
31 17
31 36
31 57
31 79
31 81
31 101
31 107
31 204
31 240
31 247
31 567
31 629
31 700
31 830
31 1069
31 1095
31 1100
31 1176
31 1223
31 1278
31 1320
31 1451
31 1772
31 1876
31 1904
31 2264
31 2490
31 2601
31 2640
31 2777
31 2851
31 2952
31 3160
31 3344
31 3383
31 3391
31 3397
31 3463
31 3508
31 3599
31 3724
31 3822
31 3943
31 4048
31 4059
31 4092
31 4133
31 4401
31 4760
32 2
32 3
32 5
32 7
32 10
32 12
32 14
32 17
32 19
32 24
32 39
32 41
32 43
32 60
32 74
32 89
32 114
32 132
32 138
32 241
32 264
32 284
32 302
32 444
32 451
32 529
32 533
32 541
32 544
32 570
32 585
32 593
32 602
32 674
32 717
32 718
32 824
32 827
32 832
32 852
32 889
32 908
32 916
32 922
32 994
32 998
32 1106
32 1177
32 1204
32 1276
32 1545
32 1618
32 1672
32 1833
32 1935
32 1979
32 1997
32 2070
32 2144
32 2315
32 2391
32 2409
32 2448
32 2453
32 2545
32 2653
32 2729
32 2801
32 2830
32 2851
32 2949
32 2954
32 3041
32 3044
32 3097
32 3178
32 3216
32 3308
32 3309
32 3414
32 3439
32 3503
32 3527
32 3539
32 3771
32 3911
32 3948
32 4102
32 4308
32 4476
32 4744
32 4858
32 4916
33 0
33 3
33 7
33 8
33 16
33 23
33 30
33 46
33 68
33 85
33 96
33 111
33 128
33 131
33 135
33 160
33 182
33 192
33 245
33 249
33 265
33 372
33 395
33 440
33 513
33 571
33 572
33 662
33 688
33 719
33 722
33 916
33 1151
33 1216
33 1279
33 1293
33 1371
33 1444
33 1489
33 1550
33 1619
33 1785
33 1793
33 1831
33 1915
33 2020
33 2060
33 2194
33 2195
33 2201
33 2238
33 2246
33 2296
33 2307
33 2362
33 2389
33 2501
33 2547
33 2570
33 2604
33 2632
33 2776
33 2787
33 2796
33 2824
33 2830
33 3019
33 3057
33 3220
33 3358
33 3456
33 3470
33 3513
33 3520
33 3546
33 3624
33 3772
33 3978
33 3982
33 4007
33 4107
33 4166
33 4397
33 4398
33 4450
33 4515
33 4527
33 4552
33 4626
33 4645
33 4746
33 4849
34 2
34 4
34 9
34 19
34 178
34 220
34 254
34 322
34 577
34 595
34 808
34 1178
34 1218
34 1353
34 1516
34 2021
34 2059
34 2856
34 4558
34 4591
34 4611
34 4816
35 3
35 7
35 8
35 14
35 15
35 17
35 18
35 19
35 22
35 52
35 65
35 73
35 81
35 87
35 88
35 109
35 112
35 116
35 121
35 149
35 156
35 158
35 172
35 190
35 202
35 218
35 232
35 263
35 294
35 303
35 318
35 319
35 321
35 344
35 375
35 376
35 379
35 413
35 419
35 423
35 430
35 471
35 505
35 523
35 557
35 572
35 580
35 598
35 605
35 616
35 665
35 724
35 763
35 775
35 784
35 786
35 814
35 817
35 832
35 865
35 1085
35 1127
35 1132
35 1158
35 1173
35 1180
35 1207
35 1233
35 1244
35 1264
35 1300
35 1325
35 1329
35 1433
35 1441
35 1460
35 1469
35 1473
35 1482
35 1507
35 1524
35 1555
35 1592
35 1594
35 1597
35 1605
35 1652
35 1666
35 1708
35 1709
35 1764
35 1917
35 1920
35 1966
35 1972
35 1991
35 2002
35 2035
35 2052
35 2119
35 2131
35 2180
35 2183
35 2333
35 2346
35 2398
35 2457
35 2501
35 2589
35 2602
35 2623
35 2628
35 2655
35 2669
35 2670
35 2695
35 2778
35 2852
35 2864
35 2921
35 3007
35 3031
35 3105
35 3106
35 3242
35 3246
35 3341
35 3398
35 3468
35 3549
35 3616
35 3629
35 3648
35 3846
35 3934
35 3940
35 3967
35 3977
35 4087
35 4270
35 4298
35 4393
35 4479
35 4498
35 4608
35 4628
35 4661
35 4663
35 4777
35 4800
35 4803
36 7
36 9
36 13
36 14
36 17
36 31
36 60
36 72
36 77
36 91
36 196
36 219
36 278
36 311
36 385
36 399
36 576
36 622
36 696
36 704
36 882
36 928
36 1123
36 1192
36 1226
36 1327
36 1328
36 1367
36 1390
36 1643
36 1846
36 2028
36 2056
36 2107
36 2549
36 2678
36 2795
36 2796
36 3045
36 3205
36 3550
36 3597
36 3765
36 4075
36 4429
36 4652
36 4857
36 4991
37 6
37 12
37 16
37 24
37 38
37 44
37 52
37 56
37 65
37 105
37 116
37 118
37 199
37 209
37 430
37 497
37 612
37 614
37 639
37 676
37 726
37 790
37 850
37 857
37 889
37 995
37 1108
37 1337
37 1412
37 1449
37 1503
37 1535
37 1544
37 1749
37 2103
37 2466
37 2480
37 2599
37 2755
37 3330
37 3348
37 3459
37 3472
37 3800
37 3865
37 4014
37 4115
37 4191
37 4209
37 4304
37 4372
37 4661
37 4701
38 4
38 6
38 7
38 9
38 11
38 21
38 24
38 26
38 27
38 37
38 80
38 99
38 122
38 138
38 147
38 150
38 151
38 216
38 246
38 257
38 315
38 321
38 328
38 449
38 474
38 542
38 700
38 778
38 784
38 821
38 1127
38 1166
38 1219
38 1290
38 1418
38 1455
38 1491
38 1505
38 1548
38 1578
38 1642
38 1748
38 1789
38 1843
38 1880
38 1882
38 1918
38 1941
38 2019
38 2047
38 2071
38 2101
38 2134
38 2212
38 2229
38 2277
38 2391
38 2409
38 2478
38 2520
38 2572
38 2621
38 2807
38 2884
38 2956
38 3073
38 3082
38 3088
38 3093
38 3145
38 3195
38 3208
38 3236
38 3353
38 3378
38 3407
38 3520
38 3635
38 3734
38 3748
38 3822
38 4020
38 4152
38 4215
38 4225
38 4253
38 4282
38 4475
38 4477
38 4767
39 5
39 7
39 8
39 13
39 20
39 32
39 144
39 161
39 420
39 503
39 709
39 1265
39 1432
39 1811
39 1955
39 1994
39 2039
39 2152
39 2441
39 2559
39 2884
39 3065
39 3692
39 4355
39 4504
40 0
40 1
40 2
40 3
40 5
40 11
40 13
40 16
40 44
40 62
40 85
40 91
40 123
40 126
40 128
40 174
40 251
40 256
40 285
40 308
40 508
40 554
40 585
40 592
40 601
40 611
40 631
40 640
40 702
40 745
40 758
40 779
40 834
40 878
40 907
40 968
40 1004
40 1063
40 1161
40 1189
40 1234
40 1274
40 1283
40 1331
40 1439
40 1499
40 1521
40 1591
40 1610
40 1704
40 1717
40 1789
40 1954
40 1963
40 1980
40 2034
40 2048
40 2077
40 2099
40 2140
40 2224
40 2327
40 2368
40 2486
40 2648
40 2668
40 2790
40 2843
40 2844
40 3196
40 3197
40 3201
40 3235
40 3329
40 3467
40 3494
40 3526
40 3603
40 3652
40 3696
40 3810
40 3937
40 3968
40 4111
40 4335
40 4442
40 4587
40 4632
40 4734
40 4772
40 4809
40 4906
41 0
41 1
41 3
41 11
41 14
41 16
41 21
41 27
41 32
41 78
41 100
41 160
41 241
41 278
41 308
41 354
41 378
41 393
41 405
41 460
41 535
41 669
41 676
41 696
41 708
41 800
41 820
41 828
41 962
41 1434
41 1485
41 1487
41 1567
41 1673
41 1834
41 1855
41 1943
41 2119
41 2220
41 2472
41 2610
41 2910
41 3016
41 3199
41 3258
41 3284
41 3455
41 3523
41 3695
41 3882
41 3978
41 4205
41 4615
41 4790
41 4810
42 6
42 9
42 14
42 18
42 23
42 87
42 106
42 110
42 189
42 264
42 284
42 353
42 460
42 474
42 497
42 570
42 591
42 712
42 1043
42 1282
42 1403
42 1484
42 1729
42 1891
42 2005
42 2062
42 2121
42 2267
42 2425
42 2564
42 2976
42 3023
42 3543
42 3562
42 3642
42 3716
42 3914
42 4047
42 4901
43 2
43 8
43 16
43 18
43 28
43 32
43 55
43 97
43 103
43 114
43 121
43 130
43 161
43 286
43 325
43 356
43 484
43 514
43 550
43 583
43 729
43 731
43 781
43 827
43 883
43 892
43 906
43 1136
43 1175
43 1268
43 1393
43 1488
43 1551
43 1707
43 1718
43 1721
43 1936
43 2067
43 2086
43 2190
43 2358
43 2365
43 2531
43 2572
43 2834
43 2906
43 2924
43 3296
43 3439
43 3489
43 3786
43 3806
43 3812
43 3850
43 3963
43 3998
43 4014
43 4021
43 4278
43 4685
43 4854
43 4978
44 2
44 6
44 8
44 11
44 16
44 23
44 37
44 40
44 45
44 51
44 58
44 71
44 74
44 81
44 95
44 131
44 143
44 150
44 156
44 172
44 180
44 184
44 185
44 186
44 197
44 205
44 218
44 254
44 349
44 554
44 562
44 563
44 609
44 628
44 641
44 661
44 728
44 740
44 755
44 765
44 885
44 979
44 1027
44 1401
44 1491
44 1562
44 1751
44 1801
44 1807
44 1899
44 2011
44 2025
44 2036
44 2040
44 2163
44 2331
44 2334
44 2377
44 2468
44 2478
44 2524
44 2707
44 2862
44 2906
44 2920
44 3110
44 3137
44 3160
44 3456
44 3684
44 3933
44 3987
44 4018
44 4032
44 4199
44 4217
44 4470
44 4518
44 4596
44 4684
44 4706
44 4717
44 4953
45 0
45 5
45 7
45 9
45 12
45 16
45 24
45 44
45 48
45 50
45 59
45 70
45 100
45 120
45 170
45 186
45 212
45 213
45 231
45 334
45 357
45 382
45 407
45 437
45 482
45 488
45 541
45 592
45 611
45 659
45 677
45 756
45 774
45 790
45 792
45 796
45 931
45 1046
45 1083
45 1169
45 1229
45 1247
45 1270
45 1334
45 1346
45 1406
45 1451
45 1519
45 1529
45 1537
45 1614
45 1656
45 1806
45 1950
45 1953
45 2291
45 2373
45 2398
45 2434
45 2581
45 3087
45 3206
45 3260
45 3278
45 3430
45 3507
45 3610
45 3727
45 3743
45 3829
45 4035
45 4128
45 4175
45 4336
45 4370
45 4395
45 4464
45 4560
45 4637
45 4671
45 4782
46 3
46 7
46 8
46 14
46 33
46 51
46 66
46 83
46 119
46 393
46 478
46 566
46 579
46 580
46 585
46 999
46 1271
46 1823
46 1880
46 2378
46 2380
46 2540
46 2855
46 2960
46 3465
46 3894
46 4038
46 4575
46 4609
46 4772
47 9
47 10
47 11
47 14
47 24
47 27
47 30
47 67
47 72
47 78
47 102
47 140
47 180
47 207
47 233
47 403
47 406
47 430
47 439
47 514
47 520
47 527
47 552
47 566
47 587
47 697
47 711
47 748
47 821
47 955
47 983
47 1117
47 1149
47 1541
47 1580
47 1975
47 2001
47 2029
47 2198
47 2485
47 3345
47 3425
47 3497
47 3612
47 3766
47 3810
47 4468
47 4519
47 4565
47 4799
47 4886
48 3
48 6
48 12
48 16
48 18
48 45
48 63
48 64
48 73
48 94
48 143
48 183
48 191
48 202
48 206
48 207
48 221
48 342
48 371
48 580
48 602
48 648
48 922
48 934
48 979
48 1094
48 1123
48 1160
48 1303
48 1346
48 1384
48 1428
48 1468
48 1497
48 1564
48 1717
48 1805
48 1861
48 1994
48 2205
48 2237
48 2250
48 2337
48 2341
48 2398
48 2434
48 2440
48 3226
48 3238
48 3240
48 3315
48 3495
48 3761
48 3862
48 3870
48 3937
48 4660
48 4773
48 4889
48 4902
49 0
49 3
49 4
49 56
49 65
49 69
49 73
49 100
49 157
49 332
49 387
49 485
49 498
49 517
49 556
49 623
49 624
49 668
49 674
49 838
49 854
49 1152
49 1216
49 1296
49 1321
49 1404
49 1477
49 1604
49 1653
49 1735
49 1764
49 1966
49 2234
49 2296
49 2322
49 2334
49 2369
49 2407
49 2466
49 2664
49 2699
49 2734
49 3114
49 3190
49 3233
49 3427
49 3716
49 3846
49 4343
49 4367
49 4568
49 4634
50 0
50 6
50 7
50 8
50 9
50 12
50 45
50 71
50 132
50 189
50 277
50 398
50 405
50 434
50 520
50 713
50 730
50 790
50 884
50 890
50 925
50 967
50 1067
50 1147
50 1221
50 1375
50 1597
50 1660
50 1712
50 1893
50 1990
50 2113
50 2198
50 2437
50 2473
50 2595
50 2675
50 2864
50 4161
50 4304
50 4362
50 4452
50 4555
50 4639
50 4726
50 4741
50 4772
51 5
51 7
51 15
51 19
51 29
51 44
51 46
51 81
51 243
51 251
51 256
51 275
51 319
51 338
51 426
51 427
51 501
51 685
51 728
51 740
51 912
51 1042
51 1058
51 1156
51 1229
51 1235
51 1245
51 1255
51 1265
51 1291
51 1307
51 1374
51 1384
51 1419
51 1446
51 1529
51 1657
51 1816
51 2021
51 2059
51 2164
51 2250
51 2276
51 2309
51 2337
51 2427
51 2465
51 2468
51 2469
51 2534
51 2725
51 2752
51 2806
51 2872
51 2892
51 2945
51 3128
51 3440
51 3530
51 3777
51 3795
51 4195
51 4228
51 4241
51 4247
51 4879
52 2
52 7
52 14
52 17
52 35
52 37
52 57
52 134
52 146
52 155
52 298
52 311
52 381
52 387
52 451
52 459
52 509
52 537
52 656
52 679
52 786
52 813
52 850
52 992
52 995
52 1126
52 1131
52 1175
52 1215
52 1363
52 1406
52 1415
52 1504
52 1556
52 1654
52 1694
52 1858
52 1885
52 2386
52 2701
52 2755
52 2791
52 2802
52 2849
52 2869
52 2990
52 3143
52 3196
52 3355
52 3707
52 3766
52 3809
52 3875
52 4142
52 4170
52 4208
52 4212
52 4219
52 4247
52 4486
52 4529
52 4530
52 4540
52 4697
52 4727
53 2
53 5
53 9
53 10
53 13
53 14
53 26
53 63
53 84
53 122
53 140
53 192
53 225
53 352
53 441
53 593
53 708
53 763
53 1073
53 1074
53 1431
53 1703
53 1801
53 1933
53 1997
53 2003
53 2175
53 2222
53 2462
53 2521
53 2726
53 2730
53 2797
53 3039
53 3051
53 3490
53 3543
53 3936
53 3988
53 4011
53 4132
53 4344
53 4589
53 4608
53 4693
53 4844
53 4898
53 4949
54 0
54 10
54 16
54 17
54 25
54 69
54 159
54 278
54 305
54 430
54 446
54 480
54 482
54 491
54 681
54 698
54 1095
54 1140
54 1215
54 1307
54 1451
54 1521
54 1590
54 1727
54 1823
54 1846
54 1865
54 1886
54 1919
54 1964
54 2004
54 2330
54 2636
54 2929
54 3006
54 3214
54 3389
54 3690
54 4126
54 4271
54 4319
54 4404
54 4633
54 4930
55 1
55 3
55 5
55 16
55 43
55 202
55 245
55 693
55 1055
55 1803
55 1987
55 2217
55 2387
55 2881
55 4203
55 4295
55 4634
55 4637
56 1
56 3
56 8
56 10
56 18
56 28
56 37
56 49
56 59
56 107
56 140
56 157
56 191
56 220
56 282
56 285
56 293
56 298
56 313
56 343
56 345
56 352
56 415
56 422
56 443
56 498
56 503
56 505
56 506
56 514
56 641
56 683
56 686
56 744
56 760
56 769
56 774
56 797
56 888
56 895
56 916
56 929
56 956
56 964
56 1014
56 1047
56 1218
56 1270
56 1328
56 1338
56 1351
56 1387
56 1494
56 1517
56 1553
56 1651
56 1665
56 1877
56 1946
56 1978
56 2033
56 2099
56 2107
56 2180
56 2184
56 2284
56 2330
56 2368
56 2377
56 2460
56 2602
56 2653
56 2665
56 2815
56 2836
56 2904
56 2916
56 3077
56 3173
56 3275
56 3296
56 3411
56 3430
56 3589
56 3680
56 3708
56 3850
56 4022
56 4104
56 4220
56 4260
56 4263
56 4273
56 4364
56 4471
56 4804
56 4814
56 4824
56 4929
57 14
57 18
57 21
57 23
57 27
57 31
57 52
57 58
57 78
57 116
57 135
57 141
57 180
57 196
57 224
57 237
57 246
57 282
57 299
57 358
57 387
57 393
57 407
57 413
57 498
57 640
57 696
57 712
57 731
57 778
57 839
57 854
57 860
57 921
57 952
57 960
57 1000
57 1084
57 1148
57 1248
57 1253
57 1291
57 1325
57 1433
57 1512
57 1544
57 2100
57 2103
57 2207
57 2280
57 2307
57 2411
57 2445
57 2588
57 2610
57 2659
57 2789
57 2830
57 3052
57 3096
57 3131
57 3222
57 3313
57 3329
57 3478
57 3556
57 3589
57 3637
57 3842
57 3887
57 3949
57 4011
57 4079
57 4212
57 4257
57 4329
57 4340
57 4580
57 4610
57 4629
57 4706
57 4708
57 4741
57 4771
57 4837
58 7
58 12
58 18
58 25
58 44
58 57
58 116
58 127
58 163
58 179
58 194
58 229
58 265
58 287
58 330
58 567
58 654
58 1083
58 1099
58 1188
58 1256
58 1273
58 1390
58 1696
58 1758
58 1800
58 2036
58 2164
58 2195
58 2271
58 2322
58 2387
58 2510
58 2781
58 2890
58 2895
58 3080
58 3192
58 3201
58 3496
58 3557
58 4049
58 4086
58 4312
58 4336
58 4352
58 4377
58 4875
59 3
59 5
59 9
59 13
59 14
59 27
59 45
59 56
59 95
59 112
59 171
59 199
59 225
59 232
59 233
59 299
59 463
59 473
59 517
59 531
59 629
59 664
59 721
59 737
59 761
59 948
59 970
59 1159
59 1253
59 1350
59 1372
59 1399
59 1463
59 1523
59 1618
59 1804
59 1834
59 2045
59 2058
59 2124
59 2207
59 2227
59 2245
59 2266
59 2369
59 2387
59 2443
59 2647
59 2703
59 2709
59 2720
59 3019
59 3125
59 3185
59 3199
59 3200
59 3268
59 3277
59 3294
59 3319
59 3405
59 3497
59 3751
59 3977
59 4038
59 4084
59 4122
59 4201
59 4249
59 4519
59 4551
59 4653
59 4721
59 4728
59 4764
59 4818
59 4896
59 4933
59 4955
60 4
60 5
60 13
60 21
60 32
60 36
60 62
60 64
60 65
60 66
60 70
60 88
60 89
60 146
60 194
60 219
60 226
60 239
60 273
60 306
60 335
60 365
60 432
60 456
60 466
60 516
60 574
60 583
60 621
60 665
60 882
60 981
60 995
60 1042
60 1166
60 1179
60 1201
60 1288
60 1439
60 1450
60 1479
60 1672
60 1873
60 1938
60 1943
60 1986
60 2022
60 2038
60 2077
60 2194
60 2237
60 2539
60 2595
60 2785
60 2796
60 2924
60 2940
60 3078
60 3096
60 3123
60 3139
60 3201
60 3380
60 3542
60 3595
60 3915
60 4044
60 4223
60 4362
60 4553
60 4711
60 4903
60 4910
61 2
61 4
61 9
61 10
61 69
61 358
61 681
61 1089
61 1496
61 1501
61 1738
61 2960
61 3302
61 4402
61 4454
62 0
62 1
62 5
62 10
62 16
62 40
62 60
62 66
62 79
62 81
62 82
62 91
62 96
62 105
62 120
62 151
62 152
62 163
62 194
62 250
62 340
62 373
62 390
62 432
62 449
62 495
62 599
62 702
62 723
62 756
62 767
62 836
62 982
62 1040
62 1041
62 1102
62 1197
62 1209
62 1215
62 1249
62 1391
62 1491
62 1503
62 1655
62 1765
62 1857
62 1890
62 1913
62 1966
62 2005
62 2020
62 2035
62 2103
62 2151
62 2165
62 2402
62 2416
62 2577
62 3026
62 3089
62 3259
62 3429
62 3495
62 3508
62 3683
62 3971
62 4001
62 4242
62 4549
63 7
63 10
63 14
63 25
63 48
63 53
63 94
63 98
63 113
63 122
63 174
63 215
63 218
63 264
63 291
63 292
63 324
63 347
63 386
63 389
63 408
63 462
63 473
63 501
63 521
63 592
63 610
63 658
63 660
63 662
63 668
63 677
63 704
63 706
63 733
63 784
63 816
63 876
63 916
63 1017
63 1089
63 1262
63 1534
63 1696
63 1700
63 1784
63 1813
63 1829
63 1841
63 2011
63 2199
63 2226
63 2251
63 2334
63 2383
63 2417
63 2426
63 2440
63 2499
63 2584
63 2631
63 2659
63 2671
63 2750
63 2827
63 2840
63 2865
63 2875
63 3060
63 3456
63 3462
63 3465
63 3690
63 3736
63 3741
63 3815
63 3938
63 3950
63 4019
63 4220
63 4265
63 4463
63 4623
63 4628
63 4792
63 4795
63 4851
63 4917
64 1
64 2
64 8
64 9
64 16
64 19
64 23
64 48
64 60
64 70
64 196
64 200
64 279
64 338
64 393
64 478
64 484
64 508
64 532
64 604
64 673
64 759
64 944
64 1114
64 1172
64 1374
64 1441
64 1446
64 1455
64 1684
64 1693
64 1733
64 1738
64 1744
64 1797
64 1832
64 2013
64 2091
64 2116
64 2222
64 2235
64 2236
64 2322
64 2403
64 2408
64 2537
64 2550
64 2654
64 2810
64 2922
64 3089
64 3317
64 3402
64 3406
64 3428
64 3454
64 3616
64 3672
64 4135
64 4335
64 4362
64 4570
64 4950
64 4964
65 12
65 14
65 35
65 37
65 49
65 60
65 91
65 106
65 277
65 351
65 498
65 523
65 541
65 689
65 777
65 1108
65 1326
65 1341
65 1470
65 1635
65 1647
65 1666
65 1810
65 2011
65 2161
65 2485
65 2511
65 2620
65 2765
65 2801
65 3073
65 3123
65 3330
65 3495
65 3541
65 3642
65 3795
65 4191
65 4192
66 1
66 2
66 6
66 8
66 14
66 17
66 19
66 46
66 60
66 62
66 89
66 94
66 113
66 149
66 165
66 237
66 269
66 274
66 294
66 409
66 460
66 538
66 578
66 603
66 613
66 633
66 657
66 898
66 952
66 960
66 981
66 1071
66 1086
66 1093
66 1150
66 1183
66 1227
66 1308
66 1358
66 1529
66 1551
66 1629
66 1687
66 1729
66 1953
66 2038
66 2104
66 2591
66 2601
66 2616
66 2655
66 2765
66 2924
66 3003
66 3009
66 3050
66 3069
66 3160
66 3186
66 3268
66 3399
66 3555
66 3598
66 3643
66 3685
66 3790
66 3819
66 3861
66 3891
66 3949
66 4016
66 4081
66 4243
66 4266
66 4269
66 4310
66 4415
66 4451
66 4474
66 4528
66 4581
66 4742
66 4912
67 2
67 3
67 12
67 16
67 47
67 87
67 153
67 258
67 268
67 298
67 554
67 741
67 828
67 830
67 896
67 898
67 1015
67 1096
67 1178
67 1224
67 1237
67 1499
67 1747
67 1769
67 1808
67 2006
67 2029
67 2097
67 2104
67 2431
67 2612
67 2899
67 3238
67 3433
67 3437
67 3618
67 3970
67 4173
67 4339
67 4384
67 4424
67 4532
67 4666
67 4845
68 1
68 8
68 9
68 12
68 14
68 33
68 174
68 175
68 201
68 281
68 282
68 373
68 395
68 414
68 419
68 476
68 612
68 730
68 788
68 953
68 1346
68 1427
68 1606
68 1654
68 1890
68 2141
68 2147
68 2274
68 2854
68 2899
68 3135
68 3212
68 3245
68 3296
68 3800
68 3968
68 3989
68 4049
68 4367
68 4374
68 4393
68 4397
68 4411
68 4985
69 0
69 3
69 4
69 7
69 12
69 49
69 54
69 61
69 107
69 125
69 134
69 146
69 154
69 165
69 167
69 231
69 239
69 242
69 255
69 305
69 316
69 319
69 337
69 345
69 376
69 377
69 445
69 614
69 746
69 748
69 786
69 854
69 905
69 996
69 1084
69 1111
69 1127
69 1246
69 1290
69 1408
69 1507
69 1692
69 1927
69 2021
69 2058
69 2159
69 2224
69 2404
69 2586
69 2728
69 2753
69 2776
69 2895
69 2909
69 2924
69 2952
69 3007
69 3307
69 3522
69 3668
69 3724
69 3774
69 3876
69 4044
69 4074
69 4090
69 4167
69 4280
69 4338
69 4357
69 4362
69 4514
69 4832
69 4960
69 4998
70 0
70 3
70 6
70 11
70 14
70 15
70 45
70 60
70 64
70 120
70 236
70 316
70 380
70 412
70 417
70 540
70 672
70 781
70 847
70 872
70 1018
70 1056
70 1070
70 1122
70 1141
70 1158
70 1324
70 1363
70 1484
70 1584
70 1709
70 1725
70 1762
70 1828
70 1897
70 2179
70 2774
70 2854
70 2893
70 3012
70 3342
70 3492
70 3494
70 3503
70 3862
70 3865
70 3990
70 4110
70 4338
70 4380
70 4389
70 4398
70 4565
70 4616
70 4860
70 4869
70 4922
71 1
71 4
71 17
71 18
71 23
71 25
71 44
71 50
71 88
71 108
71 145
71 146
71 154
71 166
71 375
71 378
71 381
71 408
71 439
71 596
71 837
71 846
71 847
71 851
71 976
71 1022
71 1080
71 1211
71 1381
71 1441
71 1460
71 1553
71 1749
71 1801
71 2026
71 2114
71 2320
71 2361
71 2472
71 2493
71 2578
71 2667
71 2740
71 2833
71 2957
71 2968
71 2984
71 3174
71 3190
71 3563
71 3564
71 3574
71 3640
71 3828
71 3870
71 3985
71 4166
71 4234
71 4260
71 4522
71 4636
71 4930
72 1
72 2
72 10
72 18
72 36
72 47
72 82
72 284
72 300
72 312
72 340
72 512
72 560
72 591
72 809
72 819
72 1255
72 1258
72 1265
72 1294
72 1375
72 1445
72 1446
72 1541
72 1607
72 1799
72 1876
72 2030
72 2152
72 2301
72 2371
72 2519
72 2800
72 3258
72 3692
72 3789
72 4431
72 4586
72 4607
73 5
73 8
73 12
73 26
73 35
73 48
73 49
73 75
73 83
73 89
73 124
73 165
73 332
73 407
73 457
73 486
73 601
73 997
73 1045
73 1405
73 1462
73 1656
73 1854
73 1898
73 1924
73 1980
73 2259
73 2372
73 2407
73 2463
73 2528
73 2654
73 2703
73 3144
73 3417
73 3598
73 3859
73 3956
73 4113
73 4260
73 4617
73 4704
73 4719
73 4851
73 4869
74 2
74 9
74 12
74 21
74 32
74 44
74 258
74 341
74 578
74 615
74 682
74 693
74 1254
74 1382
74 1398
74 1629
74 1661
74 2030
74 2139
74 2390
74 2401
74 2492
74 2702
74 2725
74 2844
74 3590
74 3613
74 3756
74 4119
74 4411
74 4723
74 4998
75 0
75 7
75 16
75 17
75 23
75 24
75 73
75 159
75 182
75 259
75 312
75 333
75 376
75 381
75 412
75 432
75 449
75 491
75 504
75 555
75 585
75 671
75 728
75 822
75 933
75 1054
75 1071
75 1115
75 1127
75 1220
75 1256
75 1362
75 1488
75 1806
75 2217
75 2376
75 2616
75 2667
75 3102
75 3251
75 3673
75 3960
75 3991
75 4140
75 4488
75 4766
75 4822
76 1
76 6
76 16
76 17
76 92
76 133
76 144
76 151
76 166
76 408
76 551
76 638
76 661
76 806
76 1096
76 1192
76 1275
76 1402
76 1528
76 1575
76 1863
76 1917
76 2044
76 2176
76 2839
76 3254
76 3419
76 3696
76 4351
76 4470
76 4846
77 0
77 7
77 19
77 27
77 36
77 136
77 201
77 221
77 488
77 533
77 892
77 1069
77 1070
77 1226
77 1681
77 1886
77 1888
77 2181
77 2237
77 2570
77 2598
77 2748
77 2779
77 3359
77 3485
77 3727
77 4080
77 4085
77 4317
78 0
78 2
78 3
78 10
78 12
78 14
78 17
78 28
78 41
78 47
78 57
78 85
78 98
78 287
78 289
78 302
78 545
78 717
78 989
78 1041
78 1100
78 1234
78 1470
78 1605
78 1712
78 1724
78 1732
78 1957
78 2042
78 2414
78 2510
78 2784
78 3166
78 3813
78 3914
78 3933
78 4125
78 4150
78 4190
78 4271
78 4890
79 0
79 2
79 6
79 14
79 17
79 21
79 31
79 62
79 97
79 113
79 125
79 131
79 142
79 175
79 243
79 253
79 306
79 426
79 437
79 452
79 477
79 525
79 582
79 600
79 1159
79 1211
79 1248
79 1289
79 1345
79 1453
79 1838
79 1897
79 2321
79 2486
79 2688
79 3020
79 3038
79 3059
79 3488
79 3993
79 4019
79 4244
79 4247
79 4505
79 4550
79 4639
79 4642
80 0
80 3
80 17
80 21
80 26
80 38
80 96
80 101
80 107
80 257
80 286
80 368
80 370
80 401
80 427
80 861
80 893
80 901
80 1083
80 1354
80 1640
80 1981
80 2365
80 2446
80 3289
80 3301
80 3516
80 3544
80 3645
80 3730
80 3763
80 3974
80 4105
80 4259
80 4432
80 4560
80 4939
81 2
81 6
81 31
81 35
81 44
81 51
81 62
81 98
81 111
81 398
81 480
81 665
81 725
81 905
81 920
81 1048
81 1084
81 1194
81 1931
81 2071
81 3046
81 3409
81 3415
81 3763
81 3767
81 3924
81 4173
81 4213
82 5
82 13
82 62
82 72
82 104
82 133
82 266
82 450
82 591
82 599
82 722
82 900
82 1247
82 1326
82 1396
82 2005
82 2091
82 2132
82 2575
82 2761
82 3006
82 3768
82 4251
82 4535
82 4856
82 4892
82 4985
83 0
83 1
83 7
83 12
83 46
83 73
83 93
83 231
83 327
83 495
83 861
83 984
83 987
83 1187
83 1294
83 1430
83 1526
83 2015
83 2270
83 2303
83 2355
83 2419
83 2446
83 2737
83 2758
83 2866
83 2975
83 3209
83 3265
83 3490
83 4266
83 4352
83 4573
83 4663
83 4855
84 7
84 21
84 28
84 53
84 110
84 116
84 143
84 289
84 341
84 353
84 416
84 475
84 493
84 527
84 579
84 610
84 635
84 638
84 671
84 672
84 741
84 762
84 764
84 806
84 813
84 827
84 886
84 981
84 985
84 1037
84 1170
84 1196
84 1330
84 1349
84 1423
84 1434
84 1524
84 1821
84 1895
84 1975
84 2074
84 2221
84 2421
84 2470
84 2503
84 2560
84 2680
84 2728
84 2790
84 3071
84 3151
84 3227
84 3435
84 3483
84 3489
84 3660
84 3664
84 3756
84 3830
84 3885
84 4067
84 4150
84 4673
84 4777
85 1
85 6
85 17
85 24
85 33
85 40
85 78
85 88
85 106
85 147
85 202
85 224
85 265
85 371
85 515
85 545
85 562
85 606
85 658
85 770
85 861
85 880
85 936
85 1018
85 1037
85 1040
85 1059
85 1093
85 1137
85 1183
85 1339
85 1474
85 1491
85 1584
85 1591
85 1780
85 1820
85 1889
85 1993
85 2016
85 2133
85 2392
85 2540
85 2556
85 2565
85 2645
85 2734
85 2836
85 3176
85 3273
85 3405
85 3462
85 3470
85 3703
85 3885
85 3913
85 4159
85 4225
85 4251
85 4308
85 4494
85 4497
85 4591
85 4722
85 4726
85 4757
85 4805
85 4852
85 4858
86 1
86 5
86 10
86 15
86 16
86 17
86 21
86 166
86 168
86 223
86 251
86 260
86 315
86 497
86 548
86 608
86 661
86 667
86 741
86 832
86 864
86 912
86 1045
86 1304
86 1382
86 1408
86 1414
86 1456
86 1607
86 1692
86 1880
86 1920
86 1996
86 2187
86 2221
86 2243
86 2311
86 2322
86 2393
86 2441
86 2760
86 2807
86 2899
86 3031
86 3087
86 3130
86 3175
86 3325
86 3491
86 4177
86 4217
86 4224
86 4554
86 4950
86 4993
87 0
87 2
87 4
87 16
87 35
87 42
87 67
87 193
87 202
87 265
87 272
87 293
87 424
87 509
87 796
87 807
87 839
87 1037
87 1214
87 1575
87 1736
87 1791
87 2256
87 2344
87 2451
87 2548
87 2593
87 2759
87 2787
87 2812
87 3176
87 3202
87 3269
87 3270
87 3282
87 3310
87 3398
87 3758
87 3786
87 3883
87 3997
87 4043
87 4077
87 4205
87 4260
88 1
88 5
88 16
88 19
88 35
88 60
88 71
88 85
88 122
88 131
88 139
88 148
88 153
88 154
88 167
88 176
88 185
88 212
88 246
88 310
88 312
88 352
88 379
88 431
88 471
88 474
88 517
88 541
88 577
88 654
88 709
88 749
88 858
88 914
88 1009
88 1024
88 1057
88 1088
88 1106
88 1158
88 1191
88 1322
88 1359
88 1388
88 1496
88 1507
88 1649
88 1691
88 1876
88 1912
88 1941
88 2091
88 2119
88 2235
88 2319
88 2450
88 2623
88 2970
88 3041
88 3101
88 3105
88 3181
88 3218
88 3260
88 3351
88 3365
88 3558
88 3608
88 3659
88 3970
88 4056
88 4090
88 4154
88 4298
88 4479
88 4569
88 4579
88 4708
88 4903
88 4915
89 5
89 9
89 12
89 14
89 19
89 32
89 60
89 66
89 73
89 107
89 129
89 136
89 139
89 212
89 262
89 354
89 554
89 642
89 695
89 823
89 854
89 1038
89 1138
89 1242
89 1583
89 1805
89 2415
89 2481
89 2529
89 2701
89 2830
89 2846
89 2867
89 3286
89 3455
89 3593
89 4341
89 4479
89 4525
89 4739
90 0
90 11
90 14
90 23
90 162
90 218
90 252
90 262
90 279
90 304
90 618
90 634
90 710
90 821
90 1887
90 2114
90 2347
90 2479
90 2546
90 2688
90 3025
90 3374
90 3480
90 3498
90 3741
90 3791
90 3810
90 4184
90 4399
90 4752
90 4883
90 4921
90 4971
91 3
91 11
91 19
91 36
91 40
91 62
91 65
91 130
91 226
91 254
91 275
91 321
91 364
91 396
91 443
91 516
91 569
91 575
91 602
91 652
91 809
91 824
91 873
91 898
91 1035
91 1054
91 1170
91 1175
91 1223
91 1271
91 1335
91 1362
91 1405
91 1406
91 1474
91 1489
91 1651
91 1777
91 1790
91 1837
91 1850
91 1994
91 2043
91 2057
91 2084
91 2304
91 2381
91 2504
91 2535
91 2654
91 2674
91 2680
91 2684
91 2701
91 2907
91 2931
91 2939
91 2947
91 2964
91 3064
91 3380
91 3529
91 4148
91 4308
91 4384
91 4449
91 4709
91 4835
91 4912
92 0
92 3
92 13
92 76
92 174
92 265
92 293
92 664
92 1320
92 1625
92 1883
92 3120
92 3435
92 4831
93 2
93 3
93 6
93 9
93 16
93 18
93 83
93 130
93 169
93 177
93 187
93 197
93 207
93 234
93 258
93 305
93 493
93 514
93 529
93 743
93 829
93 1540
93 1736
93 1742
93 1765
93 1860
93 1871
93 2017
93 2174
93 2453
93 2468
93 2541
93 2768
93 2868
93 3008
93 3335
93 3343
93 3393
93 3559
93 3564
93 3600
93 4016
93 4123
93 4430
93 4541
94 4
94 5
94 6
94 7
94 8
94 15
94 48
94 63
94 66
94 135
94 159
94 230
94 328
94 350
94 361
94 446
94 528
94 616
94 688
94 709
94 726
94 787
94 916
94 1094
94 1158
94 1192
94 1275
94 1331
94 1433
94 1436
94 1506
94 1628
94 1636
94 1857
94 1869
94 2039
94 2094
94 2335
94 2360
94 2389
94 2565
94 2574
94 2653
94 2724
94 2982
94 3295
94 3372
94 3723
94 3728
94 3764
94 3843
94 3955
94 4029
94 4162
94 4174
94 4321
94 4407
94 4488
94 4810
94 4976
94 4977
95 0
95 3
95 7
95 8
95 12
95 44
95 59
95 97
95 127
95 128
95 140
95 142
95 179
95 202
95 244
95 261
95 289
95 351
95 428
95 447
95 464
95 504
95 515
95 552
95 567
95 668
95 742
95 773
95 823
95 837
95 1009
95 1036
95 1071
95 1132
95 1192
95 1197
95 1221
95 1248
95 1310
95 1340
95 1366
95 1458
95 1497
95 1553
95 1662
95 1667
95 1727
95 2082
95 2123
95 2164
95 2191
95 2217
95 2365
95 2405
95 2416
95 2750
95 3030
95 3072
95 3073
95 3107
95 3200
95 3395
95 3411
95 3455
95 3504
95 3627
95 3826
95 4016
95 4027
95 4029
95 4094
95 4186
95 4459
95 4713
95 4759
95 4891
96 2
96 3
96 8
96 11
96 33
96 62
96 80
96 129
96 199
96 237
96 247
96 309
96 369
96 541
96 592
96 697
96 704
96 705
96 771
96 787
96 838
96 1020
96 1167
96 1183
96 1387
96 1542
96 1641
96 1703
96 1855
96 1962
96 2015
96 2217
96 2555
96 2594
96 2628
96 2683
96 2697
96 2701
96 2742
96 2812
96 2834
96 2868
96 3022
96 3031
96 3096
96 3275
96 3321
96 3336
96 3430
96 3534
96 3895
96 3919
96 4179
96 4287
96 4656
96 4706
97 1
97 12
97 22
97 43
97 79
97 95
97 114
97 119
97 479
97 525
97 637
97 797
97 907
97 1148
97 1658
97 1684
97 1794
97 2094
97 2348
97 2423
97 2569
97 2604
97 2721
97 3078
97 3098
97 3274
97 3360
97 3782
97 4182
97 4298
97 4481
97 4959
98 0
98 1
98 6
98 9
98 63
98 78
98 81
98 116
98 127
98 164
98 167
98 265
98 310
98 394
98 454
98 550
98 591
98 679
98 706
98 863
98 1085
98 1192
98 1279
98 1415
98 1470
98 1490
98 1626
98 1776
98 1983
98 2530
98 2583
98 2668
98 2841
98 2855
98 3051
98 3158
98 3313
98 3479
98 3501
98 3533
98 3688
98 3770
98 3877
98 4004
98 4255
98 4424
98 4793
99 4
99 5
99 12
99 17
99 26
99 38
99 104
99 359
99 538
99 740
99 866
99 1019
99 1034
99 1473
99 1578
99 2475
99 2909
99 2957
99 3017
99 3518
99 4055
100 5
100 12
100 13
100 17
100 41
100 45
100 49
100 105
100 119
100 129
100 169
100 283
100 372
100 433
100 484
100 490
100 506
100 603
100 956
100 1037
100 1055
100 1075
100 1083
100 1204
100 1259
100 1366
100 1432
100 2067
100 2069
100 2387
100 2426
100 2692
100 2820
100 2896
100 3073
100 3219
100 3542
100 3646
100 4149
100 4523
100 4563
100 4912
100 4995
101 0
101 6
101 14
101 16
101 17
101 31
101 80
101 125
101 147
101 227
101 237
101 297
101 486
101 509
101 623
101 816
101 850
101 885
101 1185
101 1252
101 1305
101 1542
101 2039
101 2163
101 2197
101 2301
101 2331
101 2497
101 2709
101 3059
101 3227
101 3335
101 3457
101 3607
101 4312
101 4421
101 4608
101 4633
101 4762
102 0
102 4
102 14
102 23
102 47
102 136
102 188
102 258
102 294
102 337
102 342
102 365
102 468
102 494
102 592
102 604
102 626
102 638
102 650
102 1539
102 1588
102 1982
102 2360
102 2472
102 2881
102 3010
102 3197
102 3276
102 3444
102 3520
102 3962
102 4166
102 4591
102 4718
103 1
103 2
103 7
103 10
103 21
103 43
103 714
103 1042
103 1445
103 2008
103 2160
103 2189
103 2207
103 2280
103 2681
103 2718
103 2865
103 3019
104 0
104 8
104 10
104 16
104 20
104 21
104 24
104 82
104 99
104 199
104 221
104 309
104 337
104 351
104 382
104 413
104 452
104 465
104 479
104 503
104 509
104 517
104 709
104 716
104 761
104 833
104 1022
104 1042
104 1069
104 1169
104 1229
104 1408
104 1443
104 1490
104 1535
104 1546
104 1659
104 1691
104 1735
104 1757
104 1872
104 2228
104 2263
104 2567
104 2782
104 2783
104 2870
104 3090
104 3269
104 3389
104 3572
104 3640
104 3706
104 3947
104 4469
104 4493
105 1
105 2
105 5
105 13
105 16
105 37
105 62
105 100
105 160
105 246
105 320
105 339
105 363
105 454
105 481
105 655
105 997
105 1213
105 1228
105 1266
105 1397
105 1452
105 1898
105 2109
105 2132
105 2537
105 2794
105 2909
105 3138
105 3170
105 3442
105 3454
105 3610
105 3832
105 4108
105 4109
105 4377
105 4514
105 4532
105 4683
106 3
106 7
106 10
106 19
106 24
106 27
106 42
106 65
106 85
106 149
106 208
106 243
106 295
106 314
106 335
106 400
106 418
106 425
106 485
106 511
106 557
106 674
106 710
106 839
106 864
106 1080
106 1094
106 1163
106 1235
106 1347
106 1668
106 1726
106 1745
106 1797
106 2034
106 2060
106 2670
106 2710
106 2711
106 2765
106 2810
106 3205
106 3216
106 3347
106 3396
106 3514
106 3750
106 3780
106 3803
106 3934
106 4348
106 4469
106 4542
106 4555
106 4655
106 4763
106 4814
107 6
107 31
107 56
107 69
107 80
107 89
107 341
107 1026
107 1151
107 1413
107 1550
107 1736
107 1753
107 2396
107 2654
107 2854
107 3849
107 4886
108 8
108 20
108 71
108 171
108 215
108 338
108 607
108 720
108 763
108 1504
108 1895
108 1968
108 2301
108 2528
108 2789
108 2938
108 4004
108 4273
109 1
109 10
109 35
109 203
109 244
109 336
109 606
109 610
109 613
109 1889
109 2989
109 3676
109 4052
109 4511
109 4846
110 19
110 28
110 42
110 84
110 129
110 135
110 142
110 150
110 173
110 191
110 267
110 326
110 762
110 778
110 938
110 1171
110 1284
110 1339
110 1661
110 1811
110 1962
110 2009
110 2032
110 2142
110 2167
110 2361
110 2637
110 2754
110 2823
110 3036
110 3173
110 3202
110 3434
110 3568
110 3619
110 3775
110 3859
110 4195
110 4340
110 4455
110 4555
110 4640
111 0
111 5
111 6
111 14
111 24
111 33
111 81
111 159
111 223
111 224
111 300
111 661
111 699
111 856
111 1030
111 1257
111 1593
111 2122
111 2128
111 2526
111 2792
111 3004
111 3452
111 3778
111 4513
111 4544
111 4959
112 7
112 9
112 25
112 35
112 59
112 144
112 288
112 300
112 487
112 650
112 1177
112 1755
112 1945
112 2197
112 2756
112 2801
112 4527
112 4769
112 4786
112 4839
113 12
113 27
113 63
113 66
113 79
113 199
113 209
113 242
113 544
113 646
113 775
113 882
113 892
113 946
113 1355
113 1549
113 2299
113 2392
113 2433
113 2662
113 3592
113 4068
113 4216
113 4226
113 4324
113 4677
113 4825
114 7
114 18
114 19
114 32
114 43
114 97
114 150
114 181
114 271
114 299
114 492
114 616
114 651
114 720
114 1029
114 1063
114 1066
114 1120
114 1171
114 1355
114 1447
114 1572
114 1655
114 1970
114 2478
114 2519
114 2732
114 2736
114 3069
114 3092
114 3103
114 3252
114 3460
114 3479
114 3495
114 3676
114 4446
114 4475
114 4691
114 4998
115 17
115 145
115 709
115 1402
115 2234
116 0
116 1
116 16
116 35
116 37
116 57
116 58
116 84
116 98
116 124
116 323
116 375
116 406
116 493
116 853
116 1035
116 1062
116 1107
116 1115
116 1123
116 1148
116 1150
116 1284
116 1492
116 1767
116 1815
116 1846
116 1855
116 2202
116 2907
116 3245
116 3247
116 3432
116 4011
116 4091
116 4182
116 4577
117 2
117 3
117 17
117 19
117 146
117 185
117 278
117 325
117 586
117 725
117 747
117 903
117 1179
117 1961
117 2434
117 2714
117 2725
117 2765
117 2867
117 2977
117 3079
117 3206
117 3445
117 4061
117 4171
117 4289
117 4908
117 4929
118 5
118 9
118 10
118 12
118 30
118 37
118 134
118 221
118 243
118 262
118 316
118 517
118 563
118 609
118 648
118 671
118 679
118 744
118 797
118 824
118 868
118 1248
118 1281
118 1445
118 1518
118 1655
118 1672
118 1967
118 2015
118 2230
118 2395
118 2850
118 2930
118 3391
118 3792
118 4029
118 4183
118 4576
118 4810
118 4837
118 4853
118 4887
118 4944
119 2
119 6
119 10
119 11
119 16
119 46
119 97
119 100
119 155
119 167
119 348
119 371
119 721
119 735
119 758
119 777
119 821
119 870
119 886
119 1120
119 1729
119 1871
119 1965
119 2392
119 2482
119 3438
119 3721
119 3775
119 3885
119 3901
119 4052
119 4409
119 4521
119 4690
119 4775
119 4925
120 0
120 2
120 6
120 8
120 12
120 22
120 45
120 62
120 70
120 141
120 160
120 249
120 353
120 370
120 474
120 565
120 593
120 927
120 932
120 1039
120 1090
120 1217
120 1273
120 1277
120 1300
120 1327
120 1539
120 1593
120 1813
120 2203
120 2363
120 2436
120 2679
120 2770
120 2877
120 3031
120 3126
120 3164
120 3170
120 3405
120 3505
120 3706
120 3748
120 3799
120 3847
120 3980
120 4746
120 4755
120 4852
120 4883
120 4959
121 6
121 12
121 21
121 28
121 35
121 43
121 239
121 275
121 356
121 463
121 473
121 496
121 507
121 524
121 767
121 827
121 976
121 1211
121 1258
121 1655
121 1706
121 1769
121 1814
121 2654
121 2882
121 3822
121 4076
122 0
122 2
122 12
122 13
122 20
122 38
122 53
122 63
122 88
122 258
122 398
122 472
122 576
122 634
122 751
122 832
122 907
122 976
122 1268
122 1275
122 1577
122 1590
122 1798
122 1913
122 1997
122 2076
122 2286
122 2353
122 2527
122 2559
122 2600
122 2962
122 3368
122 3385
122 3661
122 4208
122 4219
122 4461
122 4544
123 21
123 25
123 40
123 187
123 342
123 521
123 583
123 607
123 732
123 753
123 1047
123 1076
123 1195
123 1490
123 1956
123 1972
123 2031
123 2548
123 2753
123 2906
123 3874
123 4178
123 4286
123 4774
124 2
124 3
124 6
124 8
124 73
124 116
124 180
124 189
124 216
124 234
124 296
124 342
124 507
124 587
124 864
124 936
124 949
124 979
124 996
124 999
124 1062
124 1155
124 1362
124 1741
124 1766
124 1806
124 1824
124 1870
124 1905
124 2064
124 2130
124 2352
124 2437
124 2463
124 2681
124 2747
124 2799
124 2903
124 2997
124 3155
124 3287
124 3389
124 3591
124 3601
124 3690
124 3767
124 4027
124 4104
124 4240
124 4365
124 4534
124 4650
124 4670
125 4
125 8
125 11
125 69
125 79
125 101
125 142
125 146
125 196
125 202
125 222
125 232
125 323
125 720
125 741
125 1201
125 1216
125 1555
125 1863
125 1943
125 2155
125 2210
125 2228
125 2424
125 2621
125 2771
125 2863
125 3098
125 3710
125 3722
125 4212
126 2
126 6
126 9
126 12
126 40
126 131
126 167
126 248
126 255
126 295
126 578
126 673
126 917
126 1146
126 1952
126 1997
126 2179
126 2295
126 2365
126 2498
126 2632
126 2741
126 2900
126 3343
126 3404
126 3420
126 4201
126 4605
126 4637
126 4787
126 4848
127 9
127 10
127 58
127 95
127 98
127 182
127 194
127 198
127 1111
127 1276
127 1772
127 1861
127 1920
127 2224
127 3126
127 3286
127 3306
127 4664
128 0
128 2
128 6
128 15
128 29
128 33
128 40
128 95
128 183
128 208
128 227
128 262
128 409
128 439
128 443
128 566
128 782
128 809
128 984
128 1051
128 1287
128 1451
128 1548
128 1747
128 1823
128 2015
128 2087
128 2252
128 2290
128 2454
128 2674
128 2785
128 2809
128 2833
128 2845
128 3262
128 3481
128 3867
128 3921
128 3936
128 4051
128 4064
128 4159
128 4197
128 4302
128 4317
128 4351
128 4951
128 4958
129 18
129 89
129 96
129 100
129 110
129 225
129 294
129 343
129 411
129 585
129 653
129 943
129 989
129 1034
129 2469
129 2684
129 2899
129 3337
129 3486
129 3668
129 3957
129 4103
129 4156
129 4352
129 4462
129 4691
129 4995
130 10
130 21
130 22
130 43
130 91
130 93
130 166
130 262
130 274
130 505
130 1081
130 1174
130 1209
130 1324
130 2038
130 2049
130 2215
130 2484
130 2664
130 2880
130 3130
130 3190
130 3394
130 3662
130 4145
130 4222
130 4395
130 4929
130 4949
131 6
131 8
131 11
131 13
131 33
131 44
131 79
131 88
131 126
131 159
131 165
131 215
131 242
131 300
131 345
131 367
131 391
131 548
131 563
131 617
131 667
131 1121
131 1180
131 1225
131 1248
131 1287
131 1341
131 1497
131 1529
131 1557
131 1596
131 1646
131 1660
131 1877
131 1983
131 2138
131 2196
131 2223
131 2489
131 2782
131 2928
131 2956
131 3673
131 3718
131 3783
131 4073
131 4209
131 4303
131 4370
131 4519
131 4828
131 4909
132 0
132 7
132 10
132 19
132 32
132 50
132 1899
132 2427
132 4458
132 4791
133 0
133 18
133 76
133 82
133 181
133 203
133 333
133 403
133 442
133 458
133 491
133 554
133 832
133 912
133 956
133 1536
133 1722
133 1772
133 1824
133 2218
133 2220
133 3089
133 3485
133 4370
133 4752
133 4766
134 12
134 17
134 19
134 52
134 69
134 118
134 143
134 176
134 180
134 306
134 314
134 434
134 534
134 655
134 848
134 880
134 980
134 1103
134 1145
134 1206
134 1289
134 1297
134 1407
134 1429
134 1494
134 1646
134 1816
134 2000
134 2398
134 2630
134 2927
134 2978
134 3255
134 3516
134 3772
134 3961
134 4044
134 4055
134 4230
134 4238
134 4866
134 4992
135 8
135 16
135 22
135 33
135 57
135 94
135 110
135 201
135 220
135 244
135 302
135 369
135 507
135 849
135 862
135 969
135 1666
135 1788
135 2044
135 2058
135 2138
135 2212
135 2569
135 2626
135 2723
135 3020
135 3509
135 3540
135 3564
135 4022
135 4543
135 4689
136 14
136 17
136 77
136 89
136 102
136 337
136 369
136 526
136 623
136 769
136 852
136 1395
136 1520
136 1685
136 2448
136 2610
136 2696
136 3051
136 3571
136 3758
136 3995
136 4130
137 19
137 435
137 1523
138 7
138 16
138 20
138 25
138 32
138 38
138 161
138 175
138 359
138 537
138 542
138 628
138 691
138 791
138 885
138 1799
138 1810
138 1849
138 2072
138 2154
138 2628
138 2713
138 3038
138 3103
138 3268
138 3432
138 3454
138 3550
138 4306
138 4525
138 4877
138 4952
139 2
139 19
139 29
139 88
139 89
139 167
139 416
139 769
139 789
139 1227
139 1591
139 1645
139 1653
139 2032
139 2105
139 2488
139 2830
139 3048
139 3093
139 3355
139 3464
139 3561
139 3799
139 4289
139 4315
139 4379
140 1
140 5
140 47
140 53
140 56
140 95
140 314
140 450
140 528
140 755
140 1015
140 1627
140 1803
140 1934
140 2292
140 2414
140 2595
140 3176
140 3956
140 4105
140 4225
140 4959
141 6
141 14
141 57
141 120
141 158
141 855
141 910
141 990
141 1021
141 1324
141 1358
141 2041
141 2061
141 2351
141 2682
141 3253
141 3323
141 3430
141 3490
141 3638
141 4603
141 4916
142 1
142 7
142 24
142 79
142 95
142 110
142 125
142 216
142 312
142 515
142 562
142 574
142 765
142 794
142 833
142 837
142 855
142 875
142 878
142 979
142 1065
142 1121
142 1203
142 1314
142 1389
142 1571
142 1573
142 1622
142 1633
142 1662
142 1731
142 1779
142 2593
142 2882
142 2886
142 2980
142 3030
142 3852
142 4245
142 4341
142 4915
143 17
143 44
143 48
143 84
143 134
143 237
143 267
143 642
143 683
143 862
143 1023
143 1534
143 1653
143 1857
143 1963
143 2019
143 3260
143 3373
143 3732
143 3876
143 4277
143 4735
143 4796
143 4986
144 2
144 14
144 23
144 39
144 76
144 112
144 229
144 241
144 314
144 350
144 453
144 484
144 495
144 498
144 511
144 720
144 780
144 791
144 842
144 953
144 1154
144 1194
144 1238
144 1348
144 1378
144 1488
144 1509
144 1566
144 1743
144 2150
144 2180
144 2412
144 2430
144 2589
144 2613
144 2720
144 2969
144 3007
144 3011
144 3082
144 3094
144 3136
144 3152
144 3209
144 3404
144 3578
144 4129
144 4465
144 4605
145 10
145 11
145 18
145 71
145 115
145 329
145 541
145 1315
145 2569
145 3141
145 3330
145 3434
145 3790
145 4062
145 4153
146 1
146 20
146 27
146 52
146 60
146 69
146 71
146 117
146 125
146 178
146 216
146 240
146 500
146 560
146 567
146 652
146 718
146 1098
146 1790
146 1904
146 2262
146 2524
146 3394
146 3778
146 4307
146 4645
146 4689
146 4944
147 0
147 3
147 5
147 11
147 23
147 38
147 85
147 101
147 198
147 325
147 638
147 724
147 794
147 796
147 834
147 982
147 1007
147 1200
147 1473
147 1538
147 1814
147 1834
147 1894
147 1936
147 2040
147 2282
147 2356
147 2476
147 2687
147 2867
147 3549
147 3905
147 3918
147 3930
147 4204
147 4501
147 4732
148 1
148 2
148 4
148 5
148 15
148 17
148 24
148 88
148 174
148 509
148 600
148 677
148 691
148 771
148 834
148 1357
148 1371
148 1511
148 1722
148 1738
148 1944
148 1947
148 2003
148 2065
148 2101
148 2255
148 2493
148 2584
148 2886
148 2978
148 3002
148 3018
148 3150
148 3433
148 3735
148 3802
148 4708
148 4731
149 0
149 4
149 5
149 18
149 27
149 35
149 66
149 106
149 233
149 327
149 366
149 428
149 433
149 597
149 635
149 754
149 781
149 889
149 1096
149 1469
149 1905
149 2307
149 2692
149 2844
149 3068
149 3344
149 3810
149 4241
149 4463
149 4697
149 4759
150 0
150 3
150 9
150 24
150 38
150 44
150 110
150 114
150 253
150 343
150 356
150 360
150 362
150 371
150 372
150 445
150 551
150 577
150 617
150 653
150 677
150 689
150 695
150 835
150 1019
150 1172
150 1421
150 1447
150 1696
150 1719
150 1725
150 1749
150 1764
150 1816
150 1891
150 1981
150 2167
150 2310
150 2496
150 2542
150 2572
150 2699
150 2833
150 2978
150 2998
150 3491
150 3731
150 3938
150 4082
150 4114
150 4566
150 4645
150 4700
150 4830
150 4924
151 0
151 6
151 10
151 29
151 38
151 62
151 76
151 165
151 249
151 263
151 475
151 498
151 507
151 544
151 604
151 658
151 671
151 717
151 862
151 896
151 924
151 1043
151 1136
151 1301
151 1433
151 1678
151 1976
151 2738
151 2846
151 2862
151 2972
151 2982
151 3015
151 3913
151 3967
151 4189
151 4596
151 4818
152 0
152 2
152 17
152 62
152 178
152 182
152 272
152 289
152 737
152 741
152 754
152 1089
152 1897
152 2120
152 3032
152 3831
152 4138
152 4619
152 4878
152 4939
153 6
153 13
153 14
153 67
153 88
153 297
153 396
153 503
153 828
153 1101
153 1908
153 2050
153 2248
153 2265
153 2607
153 2628
153 2754
153 2782
153 3301
153 3425
153 3723
153 4044
153 4144
153 4587
153 4625
154 2
154 18
154 19
154 69
154 71
154 88
154 265
154 367
154 393
154 426
154 576
154 584
154 628
154 693
154 733
154 820
154 821
154 839
154 864
154 874
154 947
154 1009
154 1091
154 1108
154 1163
154 1175
154 1208
154 1305
154 1409
154 1624
154 1675
154 1738
154 1810
154 2100
154 2133
154 2146
154 2561
154 2563
154 2796
154 3051
154 3069
154 3452
154 3650
154 3765
154 4280
154 4363
154 4432
154 4463
154 4481
154 4518
154 4755
154 4780
154 4951
155 1
155 12
155 15
155 52
155 119
155 294
155 688
155 749
155 841
155 933
155 996
155 1170
155 1648
155 1664
155 1683
155 1782
155 1818
155 1900
155 2288
155 2296
155 2716
155 3613
155 3649
155 3906
155 4091
155 4397
155 4454
155 4942
156 1
156 2
156 3
156 5
156 8
156 35
156 44
156 177
156 290
156 342
156 397
156 430
156 502
156 536
156 734
156 1082
156 1497
156 1625
156 1672
156 2024
156 2028
156 2041
156 2299
156 2544
156 3479
156 3568
156 4040
156 4130
156 4945
157 0
157 49
157 56
157 193
157 215
157 293
157 366
157 385
157 418
157 929
157 940
157 1082
157 1162
157 1313
157 1408
157 1437
157 1597
157 1599
157 2116
157 2158
157 2400
157 2568
157 2747
157 2930
157 2982
157 3248
157 3776
157 3826
157 4586
157 4869
157 4948
158 2
158 17
158 35
158 141
158 323
158 324
158 440
158 476
158 504
158 931
158 1149
158 1969
158 2397
158 2411
158 2432
158 4230
158 4278
158 4684
158 4917
159 8
159 16
159 21
159 27
159 54
159 75
159 94
159 111
159 131
159 204
159 205
159 222
159 276
159 323
159 403
159 565
159 585
159 598
159 659
159 671
159 724
159 832
159 868
159 956
159 1024
159 1195
159 1262
159 1346
159 1400
159 1487
159 1926
159 2129
159 2520
159 2556
159 2665
159 2793
159 3188
159 3331
159 3362
159 3460
159 3794
159 3815
159 4022
159 4478
159 4611
159 4878
160 2
160 4
160 18
160 21
160 33
160 41
160 105
160 120
160 179
160 227
160 433
160 499
160 632
160 855
160 894
160 1640
160 1799
160 1894
160 1951
160 2154
160 2165
160 2208
160 2212
160 2350
160 2380
160 2525
160 2734
160 2835
160 2894
160 2916
160 3005
160 3010
160 4405
160 4410
160 4439
160 4747
161 0
161 1
161 3
161 13
161 21
161 39
161 43
161 138
161 170
161 267
161 284
161 325
161 330
161 418
161 520
161 539
161 541
161 585
161 661
161 794
161 815
161 819
161 837
161 844
161 995
161 1031
161 1165
161 1304
161 1740
161 2033
161 2178
161 2325
161 2387
161 2643
161 2775
161 3232
161 3359
161 3651
162 5
162 10
162 90
162 170
162 218
162 359
162 387
162 388
162 568
162 662
162 695
162 815
162 1014
162 1029
162 1307
162 1402
162 1504
162 2082
162 2337
162 2343
162 2398
162 2650
162 2787
162 2855
162 2923
162 3778
162 4170
163 10
163 17
163 58
163 62
163 248
163 362
163 809
163 845
163 1433
163 1545
163 1722
163 1951
163 2344
163 2501
163 2767
163 2871
163 2928
163 3148
163 3432
163 3552
164 2
164 12
164 18
164 23
164 98
164 272
164 326
164 344
164 664
164 692
164 1067
164 1260
164 1388
164 1729
164 1892
164 1928
164 2078
164 2335
164 2339
164 2382
164 2526
164 2648
164 2979
164 3114
164 3176
164 3428
164 3472
164 3763
164 3795
164 3860
164 3921
164 4387
164 4510
165 3
165 14
165 66
165 69
165 73
165 131
165 151
165 207
165 215
165 220
165 261
165 438
165 537
165 667
165 728
165 832
165 929
165 948
165 950
165 1216
165 1306
165 1379
165 1495
165 1597
165 1978
165 2285
165 3666
165 3794
165 3834
165 3948
165 4333
165 4468
165 4571
165 4858
166 14
166 15
166 17
166 71
166 76
166 86
166 130
166 225
166 251
166 257
166 324
166 326
166 553
166 655
166 731
166 853
166 1227
166 1806
166 1914
166 1990
166 2316
166 2332
166 2696
166 2720
166 2832
166 2955
166 3001
166 3067
166 3600
166 3958
166 4121
166 4134
166 4424
166 4575
166 4622
166 4649
166 4868
166 4969
167 9
167 10
167 16
167 69
167 88
167 98
167 119
167 126
167 139
167 329
167 344
167 486
167 543
167 554
167 583
167 705
167 840
167 1347
167 1551
167 1605
167 1689
167 1736
167 1812
167 2019
167 2183
167 2406
167 2453
167 3386
167 3490
167 3671
167 3745
167 3925
167 4192
167 4221
167 4297
167 4666
168 13
168 86
168 716
168 1883
168 2979
168 3807
168 4916
169 0
169 1
169 8
169 10
169 24
169 93
169 100
169 188
169 285
169 302
169 345
169 699
169 823
169 1204
169 1280
169 1357
169 1581
169 2031
169 2098
169 2511
169 2529
169 2592
169 2681
169 2802
169 2835
169 3174
169 3202
169 3532
169 3718
169 3760
169 3920
169 4440
169 4501
170 0
170 2
170 5
170 11
170 15
170 45
170 161
170 162
170 353
170 619
170 858
170 907
170 1016
170 1392
170 1496
170 1563
170 1586
170 1594
170 1715
170 1716
170 1830
170 1921
170 1976
170 2201
170 2444
170 2569
170 2577
170 2805
170 2935
170 3349
170 3554
170 3577
170 4028
170 4103
170 4369
170 4893
170 4922
171 0
171 2
171 5
171 21
171 59
171 108
171 242
171 294
171 406
171 427
171 673
171 683
171 737
171 898
171 965
171 984
171 1039
171 1077
171 1109
171 1116
171 1237
171 1243
171 1303
171 1355
171 1485
171 1580
171 1691
171 2016
171 2059
171 2357
171 2634
171 2915
171 3283
171 3349
171 3366
171 3367
171 4217
171 4232
171 4290
171 4589
171 4716
171 4775
172 17
172 21
172 25
172 35
172 44
172 1256
172 2181
172 2475
172 2699
172 4484
173 16
173 110
173 471
173 2857
173 3104
174 1
174 3
174 40
174 63
174 68
174 92
174 148
174 209
174 400
174 433
174 438
174 627
174 646
174 656
174 752
174 761
174 791
174 850
174 942
174 1241
174 1261
174 1279
174 1284
174 1292
174 1382
174 1556
174 1904
174 2051
174 2331
174 2340
174 2390
174 2509
174 2526
174 2596
174 2666
174 2705
174 2751
174 3178
174 3475
174 3652
174 3679
174 3706
174 3846
174 3933
174 4305
174 4817
175 8
175 14
175 68
175 79
175 138
175 197
175 467
175 625
175 633
175 661
175 750
175 1299
175 1397
175 1520
175 1541
175 1613
175 2147
175 2205
175 2223
175 2286
175 2374
175 2441
175 2471
175 2757
175 2987
175 2988
175 3831
175 4554
175 4590
175 4922
175 4954
176 2
176 11
176 16
176 88
176 134
176 394
176 626
176 1123
176 1170
176 1423
176 1466
176 1703
176 1864
176 2042
176 2152
176 2538
176 2561
176 2574
176 2709
176 2789
176 2811
176 2914
176 3070
176 3993
176 4217
176 4422
177 2
177 13
177 16
177 17
177 93
177 156
177 244
177 271
177 467
177 812
177 1000
177 1031
177 2373
177 2682
177 2807
177 2860
177 2945
177 3179
177 3521
177 3818
177 4340
177 4870
178 3
178 7
178 9
178 25
178 34
178 146
178 152
178 468
178 490
178 717
178 829
178 1416
178 2178
178 2187
178 2502
178 3243
178 3320
178 3583
178 3722
178 4063
178 4153
178 4553
178 4576
179 2
179 7
179 15
179 16
179 19
179 58
179 95
179 160
179 182
179 245
179 279
179 369
179 387
179 485
179 493
179 502
179 632
179 846
179 902
179 917
179 952
179 986
179 1007
179 1030
179 1081
179 1169
179 1233
179 1440
179 1578
179 1580
179 1584
179 1657
179 1695
179 1719
179 1815
179 1824
179 1866
179 1942
179 2013
179 2276
179 2319
179 2392
179 2558
179 2585
179 2721
179 2737
179 2773
179 2925
179 2942
179 3017
179 3146
179 3169
179 3180
179 3240
179 3299
179 3342
179 3555
179 3702
179 3703
179 3744
179 3771
179 3816
179 3916
179 3944
179 4039
179 4269
179 4312
179 4329
179 4346
179 4357
179 4369
179 4382
179 4418
179 4432
179 4474
179 4577
179 4752
179 4882
179 4886
179 4983
179 4997
180 19
180 44
180 47
180 57
180 124
180 134
180 255
180 266
180 420
180 1021
180 1270
180 2480
180 2592
180 3025
180 3826
180 3870
180 4844
181 1
181 3
181 12
181 14
181 25
181 114
181 133
181 329
181 499
181 677
181 884
181 990
181 1513
181 1797
181 1803
181 1865
181 1917
181 2059
181 2067
181 2638
181 2849
181 3100
181 3437
181 3458
181 3575
181 3740
181 4429
181 4523
181 4585
181 4723
182 0
182 2
182 12
182 14
182 33
182 75
182 127
182 152
182 179
182 186
182 216
182 420
182 465
182 613
182 628
182 695
182 874
182 1070
182 1536
182 1670
182 1784
182 2516
182 2607
182 2880
182 2905
182 3656
182 3990
182 4370
182 4412
182 4438
182 4439
182 4470
182 4566
182 4629
182 4665
182 4750
182 4785
182 4847
183 28
183 48
183 128
183 1333
183 1403
183 4937
184 0
184 1
184 11
184 14
184 15
184 44
184 336
184 346
184 477
184 482
184 969
184 984
184 1113
184 1419
184 1597
184 1674
184 1717
184 1888
184 2130
184 2289
184 2362
184 2455
184 2545
184 2695
184 2722
184 2793
184 3211
184 3383
184 3690
184 4208
184 4269
184 4455
184 4710
184 4756
184 4790
184 4895
185 2
185 6
185 12
185 30
185 44
185 88
185 117
185 195
185 254
185 292
185 305
185 311
185 323
185 349
185 532
185 574
185 882
185 978
185 982
185 1005
185 1185
185 1217
185 1218
185 1326
185 1491
185 1499
185 1520
185 1532
185 1660
185 1833
185 2049
185 2120
185 2139
185 2196
185 2255
185 2394
185 2404
185 2714
185 2852
185 2911
185 3361
185 3513
185 3530
185 3566
185 3646
185 4065
185 4367
185 4375
185 4501
186 5
186 11
186 30
186 44
186 45
186 182
186 288
186 440
186 547
186 666
186 890
186 1155
186 1244
186 1286
186 1527
186 1551
186 1626
186 1875
186 2024
186 2102
186 2489
186 2676
186 2774
186 3133
186 3147
186 3712
186 4075
186 4148
186 4248
186 4722
187 14
187 15
187 28
187 93
187 123
187 458
187 511
187 516
187 517
187 549
187 568
187 620
187 668
187 716
187 853
187 880
187 926
187 991
187 1084
187 1141
187 1146
187 1162
187 1175
187 1185
187 1357
187 1469
187 1749
187 1925
187 2355
187 2608
187 2717
187 2753
187 2893
187 3033
187 3142
187 3743
187 3957
187 3991
187 4394
187 4416
187 4677
187 4737
188 5
188 6
188 8
188 9
188 16
188 102
188 169
188 212
188 352
188 380
188 616
188 827
188 909
188 1636
188 2042
188 2347
188 2543
188 2935
188 3186
188 3287
188 3318
188 3383
188 3527
188 3644
188 3760
188 3942
188 4490
189 2
189 4
189 9
189 12
189 42
189 50
189 124
189 255
189 292
189 323
189 353
189 415
189 487
189 530
189 620
189 632
189 635
189 663
189 1031
189 1462
189 1496
189 1958
189 2586
189 2638
189 2948
189 2999
189 3085
189 3138
189 3170
189 3234
189 3513
189 3741
189 4518
189 4554
189 4860
190 6
190 12
190 35
190 350
190 1247
190 2109
190 2473
190 2904
190 3804
190 3812
190 4037
190 4144
190 4453
191 2
191 5
191 7
191 12
191 14
191 48
191 56
191 110
191 286
191 348
191 456
191 468
191 765
191 796
191 1039
191 1270
191 2183
191 2394
191 2905
191 3028
191 3110
191 4038
191 4082
191 4342
191 4824
192 1
192 7
192 15
192 19
192 33
192 53
192 344
192 379
192 655
192 779
192 805
192 862
192 867
192 971
192 1010
192 1012
192 1075
192 1149
192 1180
192 1183
192 1400
192 1710
192 2067
192 2191
192 2279
192 2315
192 2340
192 2418
192 2526
192 2678
192 2981
192 3215
192 3326
192 3792
192 4420
192 4624
193 0
193 4
193 8
193 23
193 87
193 157
193 351
193 376
193 489
193 494
193 520
193 529
193 644
193 645
193 975
193 1223
193 1251
193 1280
193 1363
193 1440
193 1455
193 1517
193 1559
193 1646
193 1834
193 2064
193 2175
193 2230
193 2324
193 2338
193 2687
193 2780
193 2906
193 3105
193 3169
193 3297
193 3408
193 3511
193 3670
193 3717
193 4471
193 4618
193 4628
194 0
194 2
194 6
194 14
194 23
194 58
194 60
194 62
194 127
194 204
194 248
194 250
194 251
194 260
194 283
194 347
194 409
194 452
194 460
194 467
194 672
194 791
194 867
194 918
194 928
194 950
194 1000
194 1061
194 1064
194 1352
194 1361
194 1593
194 1687
194 1716
194 1774
194 2113
194 2207
194 2381
194 2554
194 2580
194 2862
194 2866
194 3210
194 3536
194 4581
195 2
195 24
195 29
195 185
195 211
195 222
195 225
195 276
195 561
195 574
195 586
195 860
195 1172
195 1233
195 1806
195 2631
195 2762
195 2816
195 3043
195 3817
195 4161
196 9
196 10
196 14
196 36
196 57
196 64
196 125
196 279
196 358
196 445
196 463
196 529
196 852
196 958
196 1101
196 1158
196 1254
196 1292
196 1312
196 1314
196 1476
196 1815
196 1848
196 1925
196 1933
196 2000
196 2124
196 2132
196 2331
196 2524
196 2541
196 2553
196 2743
196 2875
196 3322
196 3326
196 3404
196 3912
196 4036
196 4527
196 4789
197 8
197 9
197 21
197 44
197 93
197 175
197 231
197 276
197 383
197 425
197 519
197 909
197 953
197 1012
197 1126
197 1189
197 1245
197 1340
197 1348
197 1520
197 1976
197 2034
197 2360
197 3412
197 3578
197 3828
197 4030
197 4322
197 4583
197 4598
197 4888
197 4890
198 1
198 7
198 12
198 14
198 20
198 127
198 147
198 287
198 357
198 727
198 938
198 1249
198 1495
198 1727
198 2016
198 2363
198 3178
198 3330
198 3412
198 3609
198 4234
198 4754
198 4971
199 1
199 14
199 17
199 37
199 59
199 96
199 104
199 113
199 203
199 207
199 213
199 231
199 274
199 353
199 374
199 455
199 495
199 518
199 587
199 624
199 684
199 1086
199 1111
199 1325
199 1440
199 1496
199 1546
199 1567
199 1608
199 1647
199 1681
199 1730
199 1918
199 1972
199 2062
199 2309
199 2634
199 2949
199 3772
199 3812
199 3961
199 4008
199 4281
199 4327
199 4344
199 4753
200 23
200 64
200 253
200 275
200 510
200 1198
200 1598
200 1983
200 2720
200 3311
200 3481
200 3518
200 4380
200 4473
200 4867
201 10
201 12
201 68
201 77
201 135
201 221
201 296
201 315
201 370
201 615
201 624
201 868
201 1414
201 1930
201 2189
201 2752
201 3221
201 3222
201 3528
201 4839
201 4921
202 17
202 19
202 35
202 48
202 55
202 85
202 87
202 95
202 125
202 216
202 219
202 378
202 488
202 555
202 671
202 716
202 819
202 843
202 954
202 1085
202 1238
202 1337
202 1441
202 1499
202 1500
202 1587
202 1734
202 1744
202 1885
202 2022
202 2080
202 2089
202 2364
202 2978
202 3487
202 3704
202 3885
202 3899
202 4059
202 4188
202 4224
202 4275
202 4517
202 4685
202 4961
202 4974
203 7
203 16
203 109
203 133
203 199
203 251
203 529
203 717
203 801
203 1728
203 2120
203 2853
203 3818
204 1
204 12
204 15
204 31
204 159
204 194
204 251
204 305
204 606
204 1608
204 1711
204 1739
204 1800
204 1940
204 2159
204 2361
204 2596
204 4082
204 4085
204 4183
204 4500
204 4888
204 4928
205 2
205 3
205 7
205 9
205 13
205 17
205 44
205 159
205 307
205 618
205 1174
205 1263
205 1487
205 1802
205 1950
205 2469
205 2551
205 2628
205 3791
205 3890
205 3970
205 4962
206 2
206 4
206 8
206 48
206 304
206 1086
206 1227
206 1571
206 3313
206 4012
206 4293
206 4437
207 2
207 7
207 15
207 23
207 47
207 48
207 93
207 165
207 199
207 213
207 235
207 322
207 543
207 570
207 575
207 619
207 675
207 676
207 683
207 731
207 881
207 931
207 933
207 1097
207 1554
207 1656
207 1797
207 1902
207 1979
207 2060
207 2232
207 2236
207 2246
207 2289
207 2318
207 2419
207 2607
207 2653
207 2666
207 2702
207 2777
207 2983
207 3215
207 3250
207 3354
207 3487
207 3577
207 3860
207 4033
207 4205
207 4376
207 4627
207 4766
208 0
208 10
208 106
208 128
208 555
208 558
208 938
208 1828
208 1879
208 1902
208 2263
208 2352
208 2978
208 3515
208 3588
208 3783
208 3929
208 3982
208 4783
208 4966
209 4
209 37
209 113
209 174
209 837
209 924
209 1044
209 1458
209 1480
209 1482
209 1724
209 1941
209 2547
209 3118
209 3288
209 3327
209 3346
209 3883
209 4721
209 4930
210 1
210 15
210 21
210 360
210 378
210 409
210 485
210 709
210 995
210 1102
210 1642
210 2044
210 2662
210 3026
210 3043
210 3194
210 3699
210 3739
210 3781
210 3993
211 0
211 7
211 14
211 195
211 238
211 737
211 1070
211 1346
211 1565
211 1626
211 1881
211 2513
211 2726
211 2794
211 2921
211 3603
212 5
212 25
212 45
212 88
212 89
212 188
212 407
212 695
212 711
212 760
212 854
212 891
212 1062
212 1147
212 1161
212 1733
212 1949
212 2304
212 2307
212 2317
212 2348
212 2487
212 2537
212 2621
212 2692
212 2856
212 3064
212 3301
212 3337
212 3927
212 4948
213 7
213 12
213 13
213 45
213 199
213 207
213 364
213 469
213 701
213 846
213 951
213 1051
213 1173
213 1213
213 1254
213 2203
213 3559
213 3634
213 4236
213 4317
213 4729
214 9
214 12
214 18
214 259
214 314
214 365
214 450
214 895
214 919
214 1487
214 3052
214 3079
214 3110
214 3146
214 3519
214 3658
215 9
215 23
215 63
215 108
215 131
215 157
215 165
215 286
215 302
215 374
215 511
215 640
215 1054
215 1466
215 1609
215 1866
215 2045
215 2247
215 2383
215 2389
215 2686
215 2721
215 3839
215 3917
215 3988
215 4371
215 4461
216 0
216 2
216 19
216 38
216 124
216 142
216 146
216 182
216 202
216 453
216 620
216 675
216 1055
216 1269
216 1297
216 1431
216 1795
216 1804
216 2273
216 3715
216 3857
216 3920
216 4187
216 4212
216 4356
216 4426
216 4638
217 5
217 10
217 25
217 632
217 2493
217 4395
218 2
218 11
218 12
218 25
218 35
218 44
218 63
218 90
218 162
218 273
218 290
218 307
218 342
218 372
218 375
218 416
218 449
218 806
218 891
218 1030
218 1044
218 1258
218 1383
218 1560
218 1737
218 1798
218 1813
218 2022
218 2168
218 2432
218 2450
218 2461
218 2934
218 3486
218 3518
218 3815
218 4076
218 4108
218 4478
219 5
219 10
219 36
219 60
219 202
219 881
219 896
219 924
219 1285
219 1323
219 1487
219 2755
219 2879
219 3122
219 3158
219 3666
219 3877
219 4908
220 1
220 17
220 34
220 56
220 135
220 165
220 237
220 290
220 339
220 445
220 523
220 526
220 534
220 679
220 760
220 784
220 803
220 888
220 944
220 997
220 1292
220 1334
220 1339
220 1411
220 1439
220 2110
220 2321
220 2327
220 2480
220 2554
220 2596
220 2801
220 2812
220 3139
220 3161
220 3262
220 3662
220 4051
220 4370
220 4513
221 2
221 48
221 77
221 104
221 118
221 201
221 352
221 389
221 515
221 555
221 605
221 666
221 777
221 942
221 1069
221 1386
221 1619
221 1641
221 1816
221 1944
221 2080
221 2105
221 2252
221 2498
221 3243
221 3677
221 4248
221 4462
221 4737
221 4790
222 9
222 125
222 159
222 195
222 410
222 693
222 836
222 1363
222 1581
222 2187
222 2430
222 3006
222 3466
222 4524
223 0
223 11
223 86
223 111
223 490
223 554
223 640
223 746
223 1315
223 1598
223 2159
223 2522
223 2553
223 2564
223 2645
224 12
224 24
224 57
224 85
224 111
224 327
224 618
224 935
224 1063
224 1093
224 1250
224 1286
224 1455
224 1531
224 1706
224 1963
224 2096
224 2511
224 2898
224 4543
225 0
225 4
225 8
225 10
225 53
225 59
225 129
225 166
225 195
225 244
225 248
225 280
225 372
225 405
225 407
225 439
225 441
225 469
225 487
225 523
225 538
225 550
225 554
225 555
225 610
225 687
225 688
225 729
225 1045
225 1127
225 1313
225 1468
225 1541
225 1674
225 1720
225 1731
225 1799
225 1819
225 1823
225 2159
225 2189
225 2282
225 2317
225 2358
225 2428
225 2442
225 2832
225 2922
225 3119
225 3259
225 3403
225 3440
225 3498
225 3721
225 3738
225 3987
225 4250
225 4252
225 4384
225 4438
225 4449
225 4451
225 4554
225 4692
225 4709
225 4728
226 1
226 6
226 7
226 8
226 14
226 21
226 60
226 91
226 301
226 331
226 388
226 411
226 419
226 444
226 597
226 694
226 761
226 1025
226 1144
226 1300
226 1435
226 1602
226 1635
226 1646
226 1714
226 1845
226 1970
226 2107
226 2282
226 2775
226 3608
226 4071
226 4338
226 4451
226 4460
226 4531
226 4533
227 9
227 101
227 128
227 160
227 245
227 522
227 871
227 1023
227 1092
227 1252
227 1454
227 1476
227 1748
227 1789
227 2078
227 2906
227 3459
227 3552
228 7
228 14
228 17
228 803
228 2409
228 2646
228 3052
229 5
229 8
229 13
229 58
229 144
229 253
229 284
229 414
229 441
229 543
229 607
229 624
229 1036
229 1133
229 1159
229 1288
229 1473
229 1586
229 1656
229 1883
229 2046
229 2158
229 2173
229 3028
229 3278
229 4258
229 4380
229 4573
229 4605
229 4714
230 1
230 9
230 10
230 13
230 94
230 273
230 484
230 544
230 569
230 798
230 808
230 928
230 1193
230 1227
230 1401
230 1477
230 1740
230 1799
230 1821
230 1976
230 1985
230 2017
230 2094
230 2211
230 2445
230 3084
230 3295
230 3297
230 3629
230 3664
230 4101
230 4811
231 5
231 8
231 17
231 25
231 28
231 45
231 69
231 83
231 197
231 199
231 955
231 1186
231 1423
231 1473
231 1548
231 3657
231 3672
231 3738
231 3981
231 4133
231 4810
232 8
232 16
232 17
232 18
232 35
232 59
232 125
232 297
232 383
232 589
232 752
232 803
232 884
232 1188
232 1202
232 1255
232 1334
232 1409
232 1428
232 1493
232 1972
232 2212
232 2260
232 2848
232 3024
232 3469
232 3523
232 4003
232 4161
232 4224
232 4236
232 4877
233 12
233 14
233 21
233 47
233 59
233 149
233 260
233 658
233 750
233 828
233 921
233 1051
233 1081
233 1153
233 1183
233 1201
233 1653
233 1812
233 1886
233 1914
233 1998
233 2109
233 2148
233 2391
233 2822
233 3393
233 3678
233 3702
233 3766
233 4081
233 4360
233 4700
233 4744
233 4820
234 5
234 8
234 18
234 93
234 124
234 938
234 1123
234 1294
234 1323
234 1497
234 1593
234 2256
234 2276
234 2872
234 3123
234 3200
234 3894
234 4618
234 4739
234 4753
234 4976
235 10
235 207
236 23
236 26
236 70
236 629
236 1186
236 1788
236 2663
236 4381
237 23
237 57
237 66
237 96
237 101
237 143
237 220
237 583
237 622
237 626
237 747
237 987
237 1060
237 1242
237 1249
237 2345
237 2447
237 2695
237 2698
237 2979
237 3517
237 3764
237 3817
237 3892
237 3948
237 4476
238 0
238 5
238 211
238 1068
238 4485
239 14
239 60
239 69
239 121
239 678
239 1390
239 2065
239 2291
239 2404
239 2440
239 3481
239 4616
240 0
240 30
240 31
240 146
240 511
240 1203
240 1661
240 2562
240 4281
241 12
241 32
241 41
241 144
241 243
241 285
241 324
241 539
241 575
241 1307
241 1502
241 1734
241 2250
241 2484
241 3901
241 4038
241 4627
242 12
242 14
242 69
242 113
242 131
242 171
242 252
242 265
242 543
242 679
242 1044
242 1389
242 1425
242 1600
242 1730
242 1801
242 1812
242 2272
242 2743
242 3145
242 3541
242 3635
242 4048
242 4092
242 4159
242 4472
242 4661
242 4971
243 0
243 16
243 51
243 79
243 106
243 118
243 241
243 293
243 586
243 1144
243 1210
243 1240
243 1251
243 1701
243 1883
243 2949
243 3575
243 3615
243 4078
243 4278
243 4632
243 4638
243 4856
244 0
244 1
244 10
244 16
244 95
244 109
244 135
244 177
244 225
244 430
244 540
244 584
244 610
244 964
244 1338
244 1477
244 1542
244 1679
244 1690
244 1765
244 1876
244 2193
244 2394
244 2452
244 2481
244 2482
244 2625
244 2676
244 3070
244 3080
244 3218
244 3253
244 3414
244 3843
244 3907
244 4084
244 4473
244 4672
244 4755
245 9
245 15
245 33
245 55
245 179
245 227
245 407
245 908
245 928
245 974
245 993
245 1014
245 1138
245 1502
245 1637
245 2099
245 3039
245 3905
245 4218
246 4
246 7
246 29
246 38
246 57
246 88
246 105
246 276
246 284
246 301
246 387
246 420
246 614
246 684
246 789
246 800
246 882
246 1062
246 1154
246 1198
246 1321
246 1545
246 1561
246 1630
246 1639
246 1698
246 1767
246 1795
246 2142
246 2188
246 2549
246 2743
246 2946
246 3628
246 3698
246 3702
246 3728
246 3834
246 4608
246 4718
246 4732
247 8
247 31
247 96
247 579
247 695
247 887
247 921
247 1226
247 2154
247 3326
247 3786
247 3989
248 2
248 7
248 13
248 126
248 163
248 194
248 225
248 287
248 364
248 600
248 1013
248 1029
248 1107
248 1117
248 1446
248 1499
248 1513
248 1797
248 1825
248 1920
248 1993
248 2167
248 2476
248 2481
248 3366
248 3401
248 3402
248 3540
248 3657
248 3804
248 4030
248 4102
248 4271
248 4282
248 4347
248 4557
248 4723
248 4745
249 8
249 10
249 33
249 120
249 151
249 366
249 455
249 488
249 537
249 572
249 905
249 938
249 1098
249 1164
249 1763
249 2215
249 2276
249 2919
249 3661
249 4835
250 12
250 62
250 194
250 953
250 1107
250 2784
250 3202
251 27
251 40
251 51
251 86
251 166
251 194
251 203
251 204
251 525
251 701
251 780
251 888
251 1184
251 1232
251 1417
251 1423
251 1425
251 1559
251 1685
251 1768
251 1813
251 1987
251 2171
251 2185
251 2194
251 2553
251 2586
251 2790
251 2814
251 2877
251 2954
251 3127
251 3143
251 3218
251 3476
251 3838
251 3998
251 4218
251 4248
251 4304
251 4488
251 4738
252 17
252 90
252 242
252 254
252 438
252 505
252 599
252 1518
252 1565
252 1984
252 2575
252 2810
252 2924
252 3192
252 3423
252 3807
252 3815
252 3890
252 4792
253 9
253 17
253 79
253 150
253 200
253 229
253 443
253 534
253 952
253 1517
253 2321
253 3475
253 4037
253 4454
254 10
254 34
254 44
254 91
254 185
254 252
254 282
254 2342
254 3773
255 21
255 69
255 126
255 180
255 189
255 324
255 734
255 982
255 2360
255 2730
255 3170
255 3636
255 3819
255 4308
255 4981
256 27
256 40
256 51
256 432
256 449
256 867
256 1313
256 2301
256 2332
256 3196
256 3308
256 3973
256 4234
256 4315
257 4
257 8
257 25
257 38
257 80
257 166
257 280
257 286
257 302
257 394
257 556
257 686
257 691
257 694
257 758
257 845
257 1641
257 1789
257 1997
257 2008
257 2087
257 2201
257 2206
257 2445
257 2476
257 2825
257 2971
257 3435
257 3673
257 4654
257 4829
258 7
258 20
258 22
258 67
258 74
258 93
258 102
258 122
258 419
258 424
258 506
258 511
258 656
258 920
258 1033
258 1179
258 1383
258 1388
258 1397
258 1483
258 1590
258 1646
258 1937
258 2216
258 2265
258 2291
258 2529
258 2578
258 2748
258 2930
258 2972
258 3032
258 3046
258 3188
258 3207
258 3333
258 3519
258 3812
258 4208
258 4350
258 4430
258 4539
258 4593
258 4662
258 4957
259 2
259 75
259 214
259 691
259 735
259 809
259 1361
259 1414
259 1442
259 1469
259 1481
259 1685
259 2024
259 3418
259 3483
259 4129
259 4343
260 0
260 2
260 4
260 18
260 21
260 86
260 194
260 233
260 385
260 496
260 637
260 1832
260 1838
260 2044
260 2750
260 2997
260 3165
260 3292
260 3342
260 3388
260 3734
260 3796
260 3915
261 14
261 15
261 95
261 165
261 292
261 391
261 690
261 746
261 854
261 1114
261 1488
261 1585
261 1764
261 2309
261 2983
261 3209
261 3252
261 3770
261 4043
261 4494
261 4602
261 4611
262 0
262 13
262 18
262 89
262 90
262 118
262 128
262 130
262 341
262 464
262 482
262 567
262 641
262 650
262 775
262 813
262 868
262 1150
262 1217
262 1295
262 1695
262 1910
262 1936
262 2071
262 2086
262 2288
262 2458
262 2479
262 2671
262 2905
262 2948
262 2962
262 3122
262 3124
262 3620
262 3829
262 3881
262 3960
262 3969
262 4684
262 4856
263 2
263 9
263 35
263 151
263 331
263 406
263 969
263 1129
263 1191
263 1232
263 1810
263 2149
263 2684
263 3119
263 3242
263 3646
263 4068
263 4087
263 4838
263 4874
264 3
264 9
264 22
264 27
264 32
264 42
264 63
264 285
264 489
264 1063
264 1179
264 1220
264 1258
264 1389
264 1830
264 1924
264 1978
264 2025
264 2319
264 2394
264 2403
264 2888
264 2939
264 3091
264 3101
264 3110
264 3466
264 3672
264 3949
264 4980
265 11
265 33
265 58
265 85
265 87
265 92
265 98
265 154
265 242
265 354
265 441
265 465
265 517
265 529
265 675
265 766
265 773
265 801
265 823
265 923
265 964
265 985
265 1148
265 1354
265 1513
265 1599
265 1714
265 1736
265 1744
265 1829
265 2085
265 2087
265 2280
265 2298
265 2373
265 2718
265 2915
265 3343
265 3820
265 3851
265 4055
265 4616
265 4971
266 1
266 3
266 82
266 180
266 285
266 497
266 601
266 1432
266 2040
266 2415
266 4197
267 0
267 13
267 25
267 110
267 143
267 161
267 794
267 1416
267 1475
267 1583
267 1892
267 2184
267 2636
267 3244
267 3396
268 10
268 11
268 16
268 19
268 67
268 270
268 337
268 428
268 558
268 803
268 876
268 1119
268 1131
268 1354
268 1752
268 1802
268 1853
268 2073
268 3338
268 3774
268 4034
268 4087
268 4169
268 4774
269 15
269 29
269 66
269 571
269 870
269 1291
269 1697
269 2303
269 2382
269 3262
269 3529
269 3557
269 3630
269 3647
269 3684
269 4203
269 4418
270 2
270 6
270 16
270 17
270 268
270 283
270 426
270 814
270 874
270 941
270 1007
270 1122
270 1360
270 2538
270 2678
270 2948
270 2995
270 3082
270 3406
270 3824
270 3938
271 0
271 16
271 114
271 177
271 1054
271 2537
271 4803
272 2
272 17
272 18
272 87
272 152
272 164
272 353
272 363
272 868
272 2277
272 2422
272 2750
272 2891
272 3183
272 3273
272 4193
272 4619
272 4933
273 7
273 14
273 17
273 18
273 60
273 218
273 230
273 276
273 447
273 448
273 479
273 689
273 697
273 880
273 907
273 922
273 1121
273 1152
273 1183
273 1298
273 1517
273 1758
273 1870
273 2051
273 2463
273 2571
273 2653
273 2920
273 2939
273 2957
273 2984
273 3115
273 3311
273 3474
273 3594
273 3623
273 3880
273 4193
273 4508
273 4797
273 4857
274 2
274 14
274 16
274 66
274 130
274 199
274 295
274 351
274 648
274 806
274 1073
274 1090
274 1190
274 1239
274 1268
274 1312
274 1317
274 1560
274 1890
274 2210
274 2217
274 2415
274 2740
274 3724
274 3771
275 11
275 51
275 91
275 121
275 200
275 1912
275 2667
275 3209
275 4373
276 10
276 22
276 159
276 195
276 197
276 246
276 273
276 328
276 389
276 695
276 720
276 1166
276 1190
276 1471
276 1482
276 2135
276 2779
276 2867
276 3407
276 3829
276 4052
276 4355
276 4648
277 50
277 65
277 383
277 612
277 1378
277 3645
277 3920
278 8
278 19
278 36
278 41
278 54
278 117
278 333
278 361
278 558
278 1191
278 1386
278 1519
278 1610
278 1922
278 2329
278 2426
278 2533
278 2606
278 2714
278 2733
278 2796
278 2965
278 3003
278 3055
278 3320
278 3398
278 4400
279 64
279 90
279 179
279 196
279 523
279 547
279 657
279 832
279 1124
279 1318
279 1328
279 1839
279 1848
279 2238
279 2455
279 2904
279 2956
279 3539
279 4313
280 0
280 2
280 6
280 7
280 16
280 21
280 225
280 257
280 342
280 516
280 788
280 846
280 927
280 1022
280 1172
280 1241
280 1647
280 1951
280 2094
280 2295
280 2445
280 2496
280 3021
280 3597
280 3848
280 4214
280 4353
280 4464
280 4538
280 4602
280 4983
281 9
281 25
281 26
281 68
281 420
281 1241
281 1858
281 1908
281 2663
281 3255
281 4024
281 4390
281 4473
282 8
282 12
282 16
282 25
282 28
282 56
282 57
282 68
282 254
282 329
282 347
282 422
282 488
282 642
282 645
282 852
282 949
282 1034
282 1048
282 1075
282 1130
282 1139
282 1169
282 1240
282 1251
282 1305
282 1323
282 1496
282 1574
282 1917
282 2765
282 2801
282 2921
282 3346
282 3632
282 4054
282 4305
282 4356
282 4798
282 4799
282 4816
282 4915
283 3
283 16
283 18
283 100
283 194
283 270
283 285
283 317
283 610
283 665
283 1023
283 2117
283 2972
283 3023
283 3029
283 3393
283 4023
284 13
284 32
284 42
284 72
284 161
284 229
284 246
284 522
284 852
284 931
284 1170
284 1661
284 2746
284 3136
284 4507
284 4742
285 7
285 10
285 40
285 56
285 169
285 241
285 264
285 266
285 283
285 530
285 569
285 672
285 764
285 771
285 871
285 934
285 1087
285 1131
285 1178
285 1426
285 1445
285 1683
285 1851
285 2014
285 2046
285 2128
285 2183
285 2227
285 2648
285 2968
285 3038
285 3062
285 3092
285 3130
285 3221
285 3271
285 3811
285 3880
285 4400
285 4590
285 4829
285 4865
285 4869
286 6
286 7
286 43
286 80
286 191
286 215
286 257
286 908
286 1098
286 1234
286 1644
286 1656
286 1836
286 1916
286 1947
286 2737
286 3120
286 3388
286 3762
286 4216
286 4297
286 4434
287 1
287 16
287 17
287 58
287 78
287 198
287 248
287 339
287 443
287 522
287 557
287 653
287 723
287 734
287 773
287 986
287 1256
287 1262
287 1379
287 1474
287 2049
287 2255
287 2269
287 2299
287 2326
287 2471
287 2552
287 2839
287 3288
287 3341
287 3652
287 3878
287 3916
287 4308
287 4909
288 3
288 27
288 112
288 186
288 335
288 2891
288 4552
288 4966
289 0
289 10
289 15
289 78
289 84
289 95
289 152
289 640
289 751
289 849
289 940
289 1156
289 1253
289 1483
289 1496
289 1518
289 1547
289 1684
289 1686
289 1832
289 1847
289 2302
289 2538
289 2666
289 2685
289 2937
289 2945
289 2968
289 3388
289 3598
289 3722
289 4547
289 4848
289 4910
290 7
290 16
290 156
290 218
290 220
290 1340
290 2552
290 2982
290 3634
290 3833
290 4712
291 4
291 14
291 15
291 63
291 766
292 4
292 17
292 63
292 185
292 189
292 261
292 442
292 618
292 637
292 686
292 870
292 1041
292 1178
292 1199
292 1305
292 1779
292 1803
292 2333
292 2592
292 2645
292 2661
292 2852
292 2871
292 3195
292 3792
292 3825
292 4011
292 4286
292 4433
292 4688
292 4790
292 4869
292 4944
293 8
293 56
293 87
293 92
293 157
293 243
293 752
293 1080
293 1146
293 1277
293 1285
293 1296
293 1335
293 1576
293 1903
293 1949
293 2073
293 2165
293 2315
293 2456
293 2792
293 2893
293 3328
293 3515
293 3734
293 4998
294 9
294 10
294 35
294 66
294 102
294 129
294 155
294 171
294 1095
294 1261
294 1460
294 1486
294 1709
294 1894
294 2532
294 2626
294 3163
294 3842
294 4030
294 4436
294 4523
294 4708
294 4909
295 0
295 5
295 12
295 16
295 106
295 126
295 274
295 365
295 607
295 610
295 693
295 2694
295 2806
295 2914
295 3222
295 4103
295 4472
295 4543
295 4632
295 4718
295 4829
296 5
296 124
296 201
296 301
296 452
296 644
296 1353
296 1460
296 2045
296 2266
296 2353
296 2580
296 2848
296 2937
296 3060
296 3172
296 4745
297 16
297 101
297 153
297 232
297 847
297 1176
297 2490
297 3015
297 3513
297 3987
297 4813
298 0
298 3
298 9
298 15
298 16
298 52
298 56
298 67
298 336
298 551
298 968
298 985
298 1121
298 1233
298 1274
298 1427
298 1875
298 1963
298 2853
298 3559
298 3842
298 4008
298 4149
298 4542
298 4697
298 4868
299 0
299 57
299 59
299 114
299 425
299 596
299 1068
299 1369
299 1719
299 1723
299 2348
299 2740
299 2981
299 3050
299 3716
299 4242
299 4346
299 4459
299 4623
299 4867
300 0
300 11
300 18
300 72
300 111
300 112
300 131
300 333
300 349
300 376
300 381
300 427
300 428
300 465
300 554
300 585
300 849
300 905
300 941
300 964
300 985
300 1011
300 1022
300 1032
300 1310
300 1473
300 1699
300 2151
300 2155
300 2313
300 2357
300 2432
300 2456
300 2483
300 2725
300 2734
300 3102
300 3315
300 3396
300 3408
300 3466
300 3621
300 3656
300 3768
300 3963
301 11
301 226
301 246
301 296
301 314
301 406
301 411
301 496
301 1019
301 1052
301 1230
301 1451
301 2228
301 2691
301 2772
301 3075
301 3189
301 3193
301 3606
301 4209
301 4641
302 2
302 10
302 32
302 78
302 135
302 169
302 215
302 257
302 312
302 361
302 367
302 494
302 524
302 1004
302 1102
302 1220
302 1337
302 1409
302 1872
302 1933
302 3358
302 4006
302 4172
302 4275
302 4364
302 4448
303 4
303 8
303 35
303 644
303 2105
303 4022
304 2
304 9
304 90
304 206
304 321
304 380
304 2238
304 2332
304 2376
304 2429
304 2611
304 3242
304 3421
304 3812
304 4517
304 4629
304 4657
305 2
305 16
305 27
305 54
305 69
305 93
305 185
305 204
305 325
305 340
305 475
305 512
305 602
305 695
305 710
305 827
305 1284
305 1911
305 2278
305 2860
305 3659
305 3943
305 4119
305 4322
305 4499
306 2
306 6
306 9
306 17
306 60
306 79
306 134
306 454
306 663
306 1026
306 1066
306 1303
306 1320
306 1452
306 1906
306 2123
306 2521
306 2675
306 2929
306 3293
306 3326
306 3327
306 3787
306 3813
306 3899
306 4365
306 4464
306 4624
307 2
307 9
307 18
307 205
307 218
307 450
307 543
307 687
307 1127
307 1379
307 1450
307 1471
307 1645
307 1821
307 1851
307 2012
307 2394
307 2925
307 3072
307 3201
307 3292
307 3398
307 3560
307 3615
307 3701
307 3868
307 4067
307 4559
307 4901
307 4926
308 2
308 9
308 40
308 41
308 514
308 569
308 756
308 987
308 1130
308 1374
308 1603
308 1966
308 2072
308 2461
308 2770
308 2841
308 2913
308 2967
308 3326
308 4058
309 4
309 9
309 96
309 104
309 369
309 388
309 460
309 508
309 621
309 708
309 1016
309 1124
309 1443
309 1515
309 1650
309 1697
309 1743
309 1788
309 2037
309 2066
309 2119
309 2310
309 2384
309 2467
309 2765
309 2773
309 3006
309 3133
309 3358
309 3594
309 3725
309 3966
309 4111
309 4789
310 0
310 16
310 18
310 25
310 88
310 98
310 1828
310 2126
310 2197
310 2413
310 2985
310 3019
310 3068
310 4932
311 12
311 22
311 36
311 52
311 185
311 370
311 393
311 789
311 1251
311 1389
311 1533
311 1677
311 1950
311 2143
311 2870
311 3931
311 4268
312 8
312 10
312 72
312 75
312 88
312 142
312 302
312 546
312 696
312 842
312 1032
312 1262
312 1853
312 2077
312 2264
312 2829
312 3217
312 3561
312 3774
312 3857
312 4030
312 4140
312 4650
312 4826
312 4887
313 4
313 10
313 56
313 335
313 429
313 889
313 944
313 1655
313 1759
313 2062
313 2175
313 2366
313 3383
313 3492
313 4766
314 18
314 106
314 134
314 140
314 144
314 214
314 301
314 352
314 423
314 532
314 566
314 617
314 633
314 756
314 863
314 885
314 1060
314 1442
314 1551
314 2545
314 2954
314 3256
314 3311
314 3501
314 3558
314 3744
314 3767
314 4434
314 4529
314 4739
315 8
315 38
315 86
315 201
315 562
315 908
315 1620
315 3087
315 3550
315 3788
316 2
316 10
316 69
316 70
316 118
316 438
316 481
316 828
316 1269
316 1992
316 2017
316 3661
316 4942
317 5
317 8
317 21
317 283
317 844
317 1339
317 2372
317 2386
317 3606
317 3769
317 3860
318 7
318 9
318 11
318 35
318 422
318 531
318 933
318 2686
318 4658
318 4985
319 1
319 4
319 35
319 51
319 69
319 771
319 1017
319 1044
319 1078
319 1284
319 1302
319 2003
319 2063
319 2132
319 2526
319 2605
319 2727
319 2742
319 2812
319 2885
319 2889
319 3232
319 3913
319 4280
319 4398
320 0
320 1
320 24
320 105
320 751
320 1985
320 2252
320 4289
321 0
321 13
321 25
321 35
321 38
321 91
321 304
321 546
321 607
321 885
321 1058
321 1084
321 1297
321 1354
321 2035
321 2197
321 2844
321 3606
321 4376
321 4594
321 4896
322 7
322 10
322 14
322 22
322 34
322 207
322 671
322 680
322 729
322 930
322 1021
322 1150
322 2156
322 2504
322 2594
322 2683
322 2842
322 2995
322 3018
322 3249
322 3290
322 3361
322 4440
322 4509
322 4849
323 7
323 11
323 116
323 125
323 158
323 159
323 185
323 189
323 619
323 761
323 770
323 1867
323 2167
323 2279
323 2769
323 2843
323 3275
323 4014
324 0
324 63
324 158
324 166
324 241
324 255
324 379
324 395
324 397
324 527
324 561
324 723
324 781
324 1083
324 1384
324 1497
324 1555
324 1584
324 1722
324 1882
324 2175
324 2380
324 2728
324 2843
324 2846
324 3177
324 3228
324 3292
324 3457
324 3541
324 3693
324 3759
324 4186
324 4630
325 9
325 17
325 18
325 43
325 117
325 147
325 161
325 305
325 336
325 427
325 468
325 637
325 706
325 732
325 916
325 977
325 1120
325 1144
325 1219
325 1381
325 1383
325 1534
325 1570
325 1648
325 1723
325 1848
325 1980
325 2097
325 2334
325 2471
325 2645
325 2957
325 2984
325 3018
325 3160
325 3345
325 3447
325 3476
325 3667
325 3682
325 3747
325 3864
325 4040
325 4274
325 4361
325 4543
325 4868
326 4
326 8
326 14
326 23
326 110
326 164
326 166
326 382
326 385
326 475
326 562
326 563
326 579
326 610
326 803
326 837
326 939
326 1073
326 1293
326 1354
326 1409
326 1835
326 1852
326 2272
326 2824
326 2920
326 3050
326 3092
326 3101
326 3715
326 3945
326 4095
326 4413
326 4497
326 4567
326 4652
326 4811
327 2
327 9
327 12
327 83
327 149
327 224
327 466
327 668
327 760
327 934
327 1082
327 1510
327 2918
327 3002
327 3157
327 3405
327 3415
327 3680
327 4226
328 6
328 27
328 38
328 94
328 276
328 531
328 564
328 662
328 677
328 917
328 1592
328 2280
328 2663
328 2755
328 2935
328 4055
328 4082
328 4133
329 2
329 5
329 7
329 145
329 167
329 181
329 282
329 578
329 639
329 722
329 1763
329 2007
329 2326
329 2799
329 2827
330 0
330 9
330 17
330 58
330 161
330 332
330 366
330 405
330 521
330 670
330 839
330 1280
330 1414
330 1627
330 1637
330 1794
330 1982
330 2213
330 2356
330 2396
330 2676
330 3041
330 3938
330 4013
330 4683
330 4896
331 1
331 226
331 263
331 841
332 2
332 10
332 49
332 73
332 330
332 559
332 563
332 637
332 679
332 2419
332 3297
332 3395
332 4604
333 11
333 16
333 17
333 75
333 133
333 278
333 300
333 389
333 394
333 519
333 544
333 767
333 844
333 877
333 924
333 993
333 1119
333 1285
333 1416
333 1712
333 1743
333 1810
333 1916
333 2260
333 2272
333 2288
333 2429
333 2710
333 3050
333 3379
333 3716
333 4265
333 4594
333 4617
333 4763
333 4803
333 4854
333 4897
334 5
334 9
334 11
334 15
334 45
334 348
334 354
334 462
334 638
334 641
334 790
334 1206
334 1304
334 1478
334 1700
334 2177
334 2316
334 2354
334 2463
334 2897
334 2937
334 3054
334 3142
334 3145
334 3385
334 4200
334 4422
334 4571
335 2
335 5
335 15
335 60
335 106
335 288
335 313
335 344
335 578
335 692
335 768
335 914
335 1061
335 1075
335 1229
335 1471
335 1473
335 1846
335 1983
335 2022
335 2039
335 2064
335 2096
335 2739
335 3001
335 4635
335 4645
335 4896
336 0
336 2
336 3
336 7
336 17
336 19
336 109
336 184
336 298
336 325
336 347
336 500
336 574
336 616
336 763
336 766
336 1103
336 1172
336 1251
336 1418
336 1571
336 1638
336 2012
336 2081
336 2164
336 2283
336 2379
336 2447
336 2530
336 2706
336 2797
336 2968
336 3020
336 3257
336 3496
336 3591
336 4047
336 4552
336 4832
337 1
337 4
337 9
337 16
337 18
337 23
337 26
337 69
337 102
337 104
337 136
337 268
337 358
337 382
337 425
337 433
337 662
337 958
337 1126
337 1230
337 1239
337 1373
337 1375
337 1711
337 1748
337 1755
337 1900
337 1988
337 2331
337 2431
337 2519
337 2637
337 2662
337 2666
337 2758
337 3222
337 3441
337 3568
337 3606
337 3736
337 3755
337 3774
337 3807
337 3862
337 4407
337 4425
337 4440
337 4487
337 4725
337 4735
337 4885
338 0
338 2
338 14
338 51
338 64
338 108
338 349
338 387
338 921
338 971
338 1533
338 1614
338 1702
338 2010
338 2390
338 2906
338 4185
339 105
339 220
339 287
339 522
339 605
339 1034
339 1301
339 1551
340 62
340 72
340 305
340 1472
340 2912
340 4271
341 7
341 17
341 27
341 74
341 84
341 107
341 262
341 842
341 1529
341 1851
341 2791
341 3092
341 3287
341 4101
342 4
342 48
342 102
342 123
342 124
342 156
342 218
342 280
342 776
342 784
342 845
342 899
342 900
342 1026
342 1149
342 1268
342 1340
342 1378
342 1388
342 1434
342 1508
342 1597
342 1672
342 1860
342 2124
342 3025
342 3243
342 3423
342 3743
342 3796
342 3801
342 3972
342 4037
342 4273
342 4553
342 4561
342 4642
342 4773
343 0
343 8
343 23
343 56
343 129
343 150
343 420
343 508
343 680
343 874
343 904
343 1225
343 1237
343 1454
343 1577
343 1834
343 1872
343 1969
343 1976
343 2307
343 2359
343 2597
343 3282
343 3457
343 3746
343 3956
343 4271
343 4397
343 4624
344 2
344 5
344 8
344 35
344 164
344 167
344 192
344 335
344 345
344 357
344 423
344 430
344 472
344 564
344 581
344 670
344 799
344 834
344 1057
344 1389
344 1622
344 1630
344 1638
344 1872
344 1993
344 2110
344 2249
344 2621
344 2635
344 2677
344 2952
344 3005
344 3020
344 3076
344 3145
344 3166
344 3846
344 4074
344 4075
344 4805
345 14
345 56
345 69
345 131
345 169
345 344
345 496
345 513
345 657
345 667
345 813
345 820
345 856
345 1036
345 1229
345 1297
345 1954
345 2031
345 2262
345 2571
345 2723
345 2942
345 3167
345 3293
345 3322
345 3660
345 3671
345 3923
345 4528
345 4845
345 4890
346 17
346 184
346 490
346 3655
346 4286
347 21
347 29
347 63
347 194
347 282
347 336
347 362
347 617
347 721
347 829
347 962
347 1046
347 1060
347 1304
347 1663
347 1685
347 1777
347 1931
347 2222
347 2497
347 2615
347 2651
347 3021
347 3107
347 3399
347 4337
347 4542
348 5
348 7
348 17
348 18
348 29
348 119
348 191
348 334
348 380
348 436
348 524
348 778
348 978
348 1219
348 1313
348 1441
348 1483
348 1583
348 1782
348 2532
348 2633
348 2891
348 3134
348 3160
348 3209
348 3513
348 3522
348 3950
348 4511
348 4620
348 4784
348 4864
348 4943
349 2
349 5
349 13
349 44
349 185
349 300
349 338
349 485
349 502
349 612
349 638
349 668
349 769
349 800
349 887
349 1087
349 1136
349 1618
349 1797
349 1831
349 1947
349 2070
349 2562
349 2718
349 2822
349 3842
349 3938
350 8
350 10
350 16
350 17
350 19
350 94
350 144
350 190
350 582
350 688
350 738
350 817
350 861
350 939
350 1432
350 1573
350 1798
350 1939
350 1997
350 2136
350 2192
350 2553
350 2631
350 3588
350 3615
350 3629
350 4083
350 4132
350 4287
350 4414
350 4666
351 6
351 11
351 17
351 65
351 95
351 104
351 193
351 274
351 473
351 527
351 674
351 752
351 1279
351 1361
351 1382
351 1551
351 1561
351 1615
351 2219
351 2246
351 2416
351 2419
351 2472
351 2740
351 3198
351 3462
351 3541
351 3732
351 3773
351 4208
352 5
352 23
352 53
352 56
352 88
352 188
352 221
352 314
352 1454
352 1546
352 2379
352 3803
352 4376
353 7
353 8
353 42
353 84
353 120
353 170
353 189
353 199
353 272
353 782
353 847
353 911
353 1355
353 1416
353 1474
353 1478
353 1587
353 1711
353 1770
353 2116
353 2193
353 2197
353 2893
353 2941
353 2998
353 3523
353 4850
354 3
354 5
354 13
354 26
354 41
354 89
354 265
354 334
354 494
354 541
354 702
354 895
354 914
354 1115
354 1710
354 1766
354 1909
354 1945
354 2362
354 2604
354 2747
354 3058
354 3160
354 3250
354 3487
354 3745
354 4354
355 2
355 9
355 622
355 1209
355 2358
355 2831
355 3460
355 3833
355 3903
356 7
356 8
356 15
356 30
356 43
356 121
356 150
356 476
356 702
356 718
356 1773
356 2240
356 2611
356 2837
356 2930
356 3056
356 3072
356 3249
356 3849
356 4521
357 3
357 6
357 13
357 45
357 198
357 344
357 399
357 744
357 1011
357 1090
357 1230
357 1314
357 1650
357 2067
357 3467
357 3794
357 4555
358 11
358 57
358 61
358 196
358 337
358 512
358 1584
358 2602
358 4752
359 7
359 99
359 138
359 162
359 639
359 817
359 3737
359 4329
360 10
360 14
360 27
360 150
360 210
360 395
360 436
360 665
360 799
360 816
360 820
360 903
360 944
360 1242
360 1489
360 1619
360 1639
360 2068
360 2105
360 2107
360 2335
360 2412
360 2416
360 2606
360 2983
360 3002
360 3013
360 3215
360 3546
360 3555
360 3955
360 4067
360 4410
360 4442
360 4539
360 4542
360 4637
360 4806
361 8
361 22
361 94
361 278
361 302
361 643
361 3570
361 4505
361 4593
362 1
362 8
362 11
362 27
362 150
362 163
362 347
362 456
362 501
362 542
362 566
362 687
362 768
362 889
362 907
362 1134
362 1405
362 1716
362 1913
362 2019
362 2103
362 2278
362 2282
362 2308
362 2374
362 2772
362 3238
362 3327
362 3393
362 3856
362 4141
362 4502
362 4606
362 4893
363 1
363 8
363 105
363 272
363 378
363 410
363 481
363 707
363 816
363 833
363 874
363 910
363 1261
363 1559
363 1641
363 1765
363 1812
363 2644
363 3303
363 3766
363 4652
363 4944
364 10
364 11
364 17
364 21
364 91
364 213
364 248
364 371
364 467
364 586
364 739
364 797
364 825
364 1106
364 1277
364 1281
364 1487
364 1991
364 1998
364 2754
364 3437
364 3995
364 4164
365 9
365 14
365 60
365 102
365 214
365 295
365 486
365 685
365 1435
365 1629
365 2022
365 2050
365 4201
365 4255
365 4444
365 4977
366 28
366 149
366 157
366 249
366 330
366 404
366 528
366 552
366 1846
366 2953
366 3744
366 3845
366 4070
366 4637
367 8
367 17
367 131
367 154
367 302
367 485
367 554
367 885
367 3538
367 3868
368 4
368 7
368 12
368 13
368 27
368 80
368 459
368 2415
368 4392
369 3
369 19
369 96
369 135
369 136
369 179
369 309
369 373
369 483
369 534
369 691
369 746
369 783
369 832
369 936
369 1084
369 1383
369 1867
369 1913
369 1981
369 2127
369 2202
369 2241
369 2286
369 2363
369 2531
369 2561
369 2637
369 2789
369 3453
369 4644
369 4659
369 4725
369 4980
370 18
370 80
370 120
370 201
370 311
370 553
370 1072
370 1352
370 1410
370 1718
370 2725
370 3242
370 4713
371 48
371 85
371 119
371 150
371 364
371 675
371 1085
371 1161
371 2711
371 2899
371 3171
371 4149
372 7
372 10
372 11
372 24
372 33
372 100
372 150
372 218
372 225
372 376
372 395
372 723
372 1013
372 1016
372 1449
372 1859
372 2050
372 2346
372 2625
372 3342
372 3735
373 10
373 62
373 68
373 369
373 509
373 852
373 1399
373 1558
373 3781
373 4109
373 4748
374 11
374 18
374 27
374 199
374 215
374 630
374 726
374 975
374 1333
374 1866
374 3945
374 4882
375 3
375 35
375 71
375 116
375 218
375 471
375 1512
375 2741
375 3242
376 8
376 35
376 69
376 75
376 193
376 300
376 372
376 2354
376 2542
377 1
377 69
377 854
377 1327
377 2118
377 2194
377 2811
377 4224
378 0
378 2
378 41
378 71
378 202
378 210
378 363
378 401
378 442
378 600
378 686
378 732
378 766
378 887
378 1129
378 1239
378 1304
378 1443
378 1469
378 1756
378 1838
378 2307
378 2512
378 2732
378 3196
378 4071
379 8
379 14
379 35
379 88
379 192
379 324
379 1262
379 1290
379 1485
379 1668
379 1679
379 1995
379 2815
379 3040
379 3281
379 3470
379 4482
380 0
380 7
380 16
380 70
380 188
380 304
380 348
380 482
380 499
380 680
380 798
380 806
380 828
380 971
380 1300
380 1696
380 1752
380 1881
380 1918
380 2179
380 2283
380 2345
380 2941
380 3949
380 4097
380 4115
380 4139
380 4521
380 4673
381 18
381 52
381 71
381 75
381 300
381 860
381 895
381 1109
381 1123
381 1472
381 1933
381 2698
381 2878
381 4184
382 0
382 3
382 23
382 25
382 45
382 104
382 326
382 337
382 397
382 427
382 631
382 754
382 778
382 860
382 902
382 960
382 972
382 1040
382 1278
382 1500
382 1644
382 1690
382 1727
382 1915
382 2053
382 2111
382 2271
382 2324
382 2555
382 2596
382 3192
382 3374
382 3598
382 4435
382 4954
383 2
383 7
383 11
383 197
383 232
383 277
383 548
383 560
383 647
383 902
383 1112
383 1132
383 1426
383 1463
383 1535
383 1800
383 2053
383 2182
383 2251
383 2967
383 3271
383 3474
383 3676
383 3907
383 4327
383 4474
384 10
384 606
384 2223
384 2356
384 2664
384 2792
384 3187
384 3240
384 3536
384 3563
384 4032
384 4495
385 6
385 8
385 36
385 157
385 260
385 326
385 532
385 2001
385 2057
385 2195
385 2711
385 2868
385 3069
385 3770
386 0
386 15
386 27
386 63
386 404
386 428
386 457
386 560
386 588
386 855
386 1176
386 2387
386 2467
386 2562
386 3069
386 3315
386 4902
387 6
387 16
387 49
387 52
387 57
387 162
387 179
387 246
387 338
387 411
387 460
387 588
387 603
387 712
387 721
387 857
387 930
387 1011
387 1019
387 1158
387 1293
387 1822
387 2098
387 2220
387 2874
387 3154
387 3183
387 3660
387 3835
387 4024
387 4242
387 4254
387 4327
387 4671
388 3
388 162
388 226
388 309
388 579
388 848
388 1040
388 3339
388 3679
388 3757
388 3819
389 2
389 63
389 221
389 276
389 333
389 501
389 1422
389 2128
389 2469
389 3333
389 4081
389 4251
389 4426
389 4460
390 4
390 7
390 15
390 17
390 62
390 435
390 1303
390 1381
390 1431
390 2566
390 2980
390 3554
390 4036
390 4387
390 4473
391 6
391 13
391 15
391 19
391 131
391 261
391 786
391 840
391 1898
391 2149
391 2311
391 3037
391 3814
391 4608
391 4822
392 14
392 1063
392 1756
392 1984
392 2040
393 10
393 30
393 41
393 46
393 57
393 64
393 154
393 311
393 483
393 505
393 596
393 629
393 876
393 893
393 1200
393 1415
393 2330
393 2349
393 2687
393 3692
393 3992
393 4174
393 4559
393 4765
394 2
394 3
394 10
394 98
394 176
394 257
394 333
394 422
394 529
394 1251
394 1253
394 1558
394 1941
394 2465
394 3093
394 3248
394 3402
395 9
395 33
395 68
395 324
395 360
395 372
395 612
395 790
395 809
395 819
395 877
395 889
395 989
395 2586
395 2654
395 3055
395 3086
395 3270
395 3273
395 3576
395 3845
395 4216
395 4383
395 4453
395 4793
396 0
396 10
396 91
396 153
396 401
396 1392
396 2552
396 3264
396 3544
396 3736
396 4069
397 0
397 3
397 16
397 27
397 156
397 324
397 382
397 560
397 648
397 664
397 771
397 810
397 887
397 962
397 1342
397 1392
397 1400
397 2035
397 2092
397 2135
397 2245
397 2597
397 2629
397 2635
397 2855
397 2925
397 3163
397 3475
397 3640
397 3825
397 3871
397 3982
397 4139
397 4263
397 4303
397 4333
397 4335
397 4511
397 4627
397 4767
397 4982
398 3
398 50
398 81
398 122
398 782
398 1154
398 1163
398 1283
398 1626
398 2201
398 2359
398 2510
398 2546
398 2568
398 2730
398 2813
398 2910
398 3385
398 3500
398 3793
398 4769
398 4906
398 4979
399 9
399 10
399 36
399 357
399 571
399 794
399 898
399 1055
399 1173
399 1243
399 1258
399 1318
399 1399
399 1560
399 1878
399 2293
399 2476
399 2801
399 2952
399 3275
399 3501
399 3762
399 4118
399 4184
399 4233
399 4316
399 4352
399 4405
399 4657
400 3
400 16
400 106
400 174
400 1353
400 1614
400 2164
400 2614
400 2648
400 3280
400 3422
400 4004
400 4416
401 6
401 11
401 80
401 378
401 396
401 1194
401 1919
401 2021
401 2821
401 3787
401 3790
401 4919
402 5
402 22
402 556
402 713
402 1121
402 1144
402 4019
403 18
403 47
403 133
403 159
404 0
404 8
404 12
404 29
404 366
404 386
404 920
404 1120
404 1164
404 1171
404 2874
404 2969
404 3335
405 4
405 10
405 41
405 50
405 225
405 330
405 431
405 478
405 850
405 855
405 988
405 1011
405 1057
405 1118
405 1447
405 1470
405 1673
405 1869
405 2027
405 2262
405 2416
405 2457
405 2470
405 2485
405 2738
405 3071
405 3280
405 4010
405 4217
405 4375
405 4426
405 4627
405 4654
406 13
406 17
406 47
406 116
406 171
406 263
406 301
406 842
406 1234
406 3512
406 4305
406 4427
406 4612
407 25
407 45
407 57
407 73
407 212
407 225
407 245
407 645
407 738
407 877
407 1174
407 1405
407 1421
407 1498
407 1875
407 2265
407 2285
407 2419
407 2693
407 2812
407 3727
407 4048
407 4633
407 4798
408 3
408 12
408 20
408 63
408 71
408 76
408 410
408 552
408 557
408 747
408 783
408 1178
408 1249
408 1365
408 1417
408 2185
408 2473
408 3889
408 4041
409 5
409 9
409 28
409 66
409 128
409 194
409 210
409 526
409 527
409 531
409 1041
409 1085
409 1164
409 1367
409 1564
409 1908
409 1997
409 2082
409 2294
409 2679
409 2908
409 3137
409 3169
409 3361
409 3436
409 3556
409 4246
409 4301
409 4451
409 4605
410 22
410 222
410 363
410 408
410 523
410 615
410 812
410 968
410 1115
410 1304
410 1547
410 1823
410 2001
410 2054
410 2114
410 2280
410 2367
410 2398
410 2447
410 2495
410 4001
410 4233
410 4802
411 6
411 11
411 129
411 226
411 301
411 387
411 418
411 698
411 945
411 1049
411 1595
411 1758
411 2100
411 3225
411 3967
411 4729
412 1
412 12
412 22
412 70
412 75
412 1332
412 1634
412 1660
412 3897
413 2
413 5
413 7
413 15
413 35
413 57
413 104
413 595
413 765
413 1106
413 1156
413 1344
413 1464
413 1640
413 2102
413 2159
413 2315
413 2733
413 3212
413 3676
413 3692
413 4365
413 4663
414 2
414 6
414 16
414 30
414 68
414 229
414 480
414 674
414 876
414 907
414 1049
414 1447
414 1498
414 1596
414 1603
414 1629
414 1959
414 2047
414 3005
414 3147
414 3678
414 4082
415 7
415 14
415 56
415 189
415 466
415 1148
415 1291
415 1372
415 1402
415 1465
415 1474
415 1818
415 1999
415 2031
415 2479
415 2495
415 2530
415 2673
415 2920
415 3032
415 3071
415 3315
415 3548
415 3664
415 3940
415 4137
415 4259
415 4451
415 4515
415 4557
416 5
416 10
416 23
416 84
416 139
416 218
416 782
416 951
416 952
416 977
416 1335
416 1530
416 1667
416 2170
416 2526
416 2634
416 3094
416 3174
416 3732
416 3764
416 4740
417 5
417 9
417 70
417 1525
417 4522
418 106
418 157
418 161
418 411
418 625
418 755
418 758
418 1059
418 1457
418 2038
418 2403
418 2481
418 2927
418 3114
418 3209
418 3614
418 3632
418 3903
418 4024
418 4804
418 4808
419 4
419 7
419 14
419 17
419 35
419 68
419 226
419 258
419 447
419 489
419 547
419 692
419 826
419 884
419 891
419 906
419 987
419 1035
419 1234
419 1295
419 1443
419 1894
419 2248
419 3156
419 3328
419 3717
419 3804
419 4020
419 4190
419 4211
419 4438
419 4673
419 4691
419 4716
420 1
420 39
420 180
420 182
420 246
420 281
420 343
420 514
420 784
420 804
420 964
420 985
420 1783
420 1844
420 1858
420 2008
420 2313
420 2883
421 0
421 3
421 6
421 16
421 23
421 481
421 748
421 769
421 887
421 1147
421 1230
421 1402
421 1725
421 2206
421 2975
421 3199
421 4367
422 4
422 56
422 282
422 318
422 394
422 715
422 800
422 936
422 1104
422 1301
422 1302
422 2098
422 3824
422 4439
422 4515
423 1
423 9
423 35
423 314
423 344
423 571
423 931
423 962
423 979
423 1591
423 1760
423 2305
423 3452
423 4011
424 0
424 2
424 3
424 4
424 7
424 10
424 87
424 258
424 520
424 700
424 741
424 1025
424 1053
424 1102
424 1169
424 1296
424 1561
424 1571
424 1628
424 1745
424 1845
424 2503
424 3000
424 3314
424 3452
424 3888
424 4055
424 4175
424 4551
425 11
425 106
425 197
425 299
425 337
425 582
425 1525
425 3990
425 4202
426 2
426 5
426 10
426 51
426 79
426 154
426 270
426 512
426 610
426 640
426 788
426 836
426 1255
426 1511
426 2353
426 2523
426 2591
426 2668
426 2802
426 3813
426 4443
426 4659
427 51
427 80
427 171
427 300
427 325
427 382
427 1076
427 1157
427 1412
427 1743
427 3628
427 3698
427 4651
428 2
428 23
428 95
428 149
428 268
428 300
428 386
428 721
428 735
428 855
428 877
428 915
428 1399
428 1694
428 1982
428 2272
428 3377
428 4354
428 4716
429 8
429 313
429 1386
429 1510
429 1988
429 2121
429 2127
429 2165
429 4029
429 4174
430 4
430 35
430 37
430 47
430 54
430 156
430 244
430 344
430 444
430 504
430 551
430 617
430 648
430 682
430 727
430 749
430 797
430 876
430 1176
430 1453
430 1516
430 1548
430 1578
430 1592
430 1661
430 2140
430 2231
430 2477
430 2529
430 2720
430 2761
430 2803
430 2814
430 2971
430 3124
430 3612
430 3790
430 3862
430 3944
430 4263
430 4378
430 4430
430 4570
430 4573
430 4802
431 0
431 17
431 30
431 88
431 405
431 534
431 761
431 948
431 1165
431 2384
431 3434
431 4276
432 9
432 19
432 60
432 62
432 75
432 256
432 453
432 506
432 696
432 712
432 715
432 751
432 842
432 854
432 915
432 1065
432 1213
432 1349
432 1490
432 1945
432 2335
432 2739
432 3220
432 3285
432 3296
432 3755
433 1
433 7
433 10
433 100
433 149
433 160
433 174
433 337
433 453
433 481
433 556
433 821
433 918
433 1139
433 1461
433 1760
433 2066
433 2590
433 2823
433 3745
433 3928
433 4194
433 4213
433 4568
433 4620
433 4695
434 2
434 7
434 17
434 50
434 134
434 1088
434 2326
434 3859
435 16
435 137
435 390
435 596
435 1370
435 2415
435 3345
435 3535
435 4135
436 2
436 8
436 348
436 360
436 451
436 869
436 1047
436 1118
436 1513
436 1756
436 2261
436 2289
436 2384
436 3533
436 3818
436 3959
436 4918
436 4950
437 45
437 79
437 4583
438 5
438 14
438 22
438 165
438 174
438 252
438 316
438 650
438 726
438 808
438 875
438 1001
438 1172
438 1383
438 1663
438 1779
438 2563
438 2625
438 2799
438 2819
438 3009
438 3305
438 3844
438 3880
438 4482
438 4870
439 47
439 71
439 128
439 225
439 1408
439 1553
439 1757
439 1816
439 2162
439 2318
439 2587
439 2881
439 3701
439 3939
440 12
440 17
440 33
440 158
440 186
440 670
440 1056
440 1230
440 1740
440 1962
440 2005
440 2045
440 2153
440 3286
440 3297
440 3982
440 4001
440 4025
440 4054
440 4703
440 4746
440 4948
441 5
441 13
441 16
441 53
441 225
441 229
441 265
441 447
441 690
441 839
441 1007
441 1039
441 1124
441 1701
441 1837
441 1972
441 2047
441 2222
441 2638
441 3143
441 3882
441 4096
441 4220
441 4337
441 4680
442 3
442 5
442 7
442 17
442 133
442 292
442 378
442 490
442 989
442 1018
442 1203
442 1267
442 1275
442 1360
442 1484
442 2112
442 2179
442 2613
442 2668
442 2735
442 2923
442 3126
442 3131
442 3151
442 3438
442 3517
442 3531
442 3568
442 3865
442 4243
442 4501
442 4586
442 4700
442 4850
443 1
443 3
443 17
443 56
443 91
443 128
443 253
443 287
443 508
443 634
443 1087
443 2744
443 2983
443 3001
443 3384
444 7
444 32
444 226
444 430
444 605
444 618
444 858
444 1017
444 1140
444 1351
444 1394
444 1630
444 1910
444 2535
444 3522
444 3591
444 3819
444 3918
444 3999
444 4394
444 4620
445 69
445 150
445 196
445 220
445 969
445 980
445 1367
445 1546
445 1636
445 3702
446 1
446 13
446 14
446 17
446 21
446 54
446 94
446 468
446 512
446 1082
446 1090
446 1285
446 1950
446 2306
446 2455
446 2685
446 3091
446 3096
446 3246
446 3485
446 3571
446 4473
446 4483
446 4674
446 4827
447 4
447 95
447 273
447 419
447 441
447 467
447 771
447 832
447 861
447 1467
447 1609
447 1635
447 1698
447 1815
447 2090
447 2111
447 2468
447 2762
447 3526
448 8
448 273
448 1572
448 4549
449 38
449 62
449 75
449 218
449 256
449 473
449 544
449 951
449 1224
449 1399
449 1452
449 1770
449 2068
449 2112
449 2302
449 2608
449 2635
449 2825
449 3107
449 3115
449 3373
449 3683
449 3951
449 4089
449 4521
449 4760
450 16
450 82
450 140
450 214
450 307
450 1394
450 2075
450 2894
450 3452
450 4941
451 3
451 16
451 21
451 32
451 52
451 436
451 464
451 577
451 726
451 767
451 851
451 975
451 1141
451 1147
451 1205
451 1318
451 1344
451 1501
451 1573
451 1830
451 2958
451 3079
451 3622
451 3971
452 8
452 79
452 104
452 194
452 296
452 659
452 918
452 1477
452 2455
452 3993
453 3
453 8
453 144
453 216
453 432
453 433
453 626
453 894
453 1302
453 1615
453 2475
453 2649
453 2835
453 3345
453 3486
453 3805
453 4084
453 4867
454 1
454 4
454 98
454 105
454 306
454 1050
454 1390
454 1622
454 1889
454 2173
454 2297
454 2376
454 3221
454 3745
454 4365
455 1
455 9
455 199
455 249
456 28
456 60
456 191
456 362
456 641
456 649
456 737
456 996
456 1127
456 1449
456 1726
456 2305
456 2776
456 2942
456 2950
456 3288
456 3577
456 3839
456 4380
456 4565
457 10
457 73
457 386
457 790
457 1093
457 1117
457 1228
457 1922
457 2483
457 2782
457 3243
457 4036
457 4083
457 4085
458 11
458 14
458 17
458 133
458 187
458 1693
458 1943
459 19
459 52
459 368
459 501
459 557
459 615
459 639
459 743
459 811
459 1268
459 1991
459 2261
459 2708
459 2960
459 3248
459 3292
459 3323
459 3324
459 3943
459 4386
459 4994
460 3
460 4
460 17
460 41
460 42
460 66
460 194
460 309
460 387
460 604
460 1281
460 1791
460 2228
460 2358
460 2593
460 2903
460 3029
460 3434
460 3437
460 3962
460 3967
460 4015
460 4025
460 4037
460 4334
460 4576
460 4587
460 4925
460 4969
461 0
461 5
461 16
461 25
461 706
461 1965
461 2652
461 2990
461 3255
461 3294
461 3630
461 3835
461 4058
461 4229
461 4439
462 0
462 1
462 63
462 334
462 1289
462 1873
462 2018
462 2385
462 2394
462 2862
462 3026
462 3274
462 4912
463 0
463 10
463 59
463 121
463 196
463 547
463 685
463 1426
463 1462
463 2172
463 3786
464 0
464 7
464 16
464 95
464 262
464 451
464 609
464 637
464 1028
464 1051
464 1119
464 1712
464 1716
464 1816
464 1945
464 2050
464 2071
464 2090
464 2566
464 2835
464 2883
464 3138
464 4519
465 29
465 104
465 182
465 265
465 300
465 603
465 950
465 1097
465 1102
465 4873
466 12
466 60
466 327
466 415
466 652
466 836
466 1496
467 7
467 10
467 27
467 175
467 177
467 194
467 364
467 447
467 504
467 524
467 529
467 573
467 631
467 845
467 937
467 1006
467 1355
467 1493
467 1818
467 1853
467 1908
467 2342
467 2423
467 2590
467 2643
467 2695
467 2705
467 2982
467 3104
467 3167
467 3298
467 3361
467 3443
467 3526
467 3551
467 3571
467 4203
467 4557
467 4685
467 4859
467 4865
468 3
468 4
468 17
468 102
468 178
468 191
468 325
468 446
468 482
468 878
468 1047
468 1105
468 1248
468 1623
468 1638
468 2379
468 2433
468 2527
468 2537
468 2800
468 2895
468 3538
468 3981
468 4190
468 4310
469 5
469 25
469 213
469 225
469 1580
469 1604
469 1857
469 2189
469 2508
469 2778
469 3203
469 3785
469 4058
469 4329
469 4461
469 4491
469 4961
470 5
470 1038
470 4252
471 2
471 24
471 25
471 35
471 88
471 173
471 375
471 656
471 3534
471 4657
472 9
472 14
472 22
472 122
472 344
472 601
472 672
472 1559
472 1760
472 2079
472 2266
472 2509
472 2646
472 2899
472 3547
472 4512
473 17
473 18
473 19
473 59
473 63
473 121
473 351
473 449
473 856
473 1656
473 1931
473 2308
473 2520
473 2624
473 3629
473 3750
473 4711
473 4718
474 38
474 42
474 88
474 120
474 649
474 883
474 991
474 1449
474 1519
474 1578
474 1837
474 2750
474 2784
474 4501
475 1
475 13
475 84
475 151
475 305
475 326
475 488
475 973
475 991
475 1056
475 1268
475 1294
475 1427
475 1568
475 1689
475 1817
475 2116
475 2433
475 2859
475 3054
475 3950
475 4084
475 4204
475 4237
475 4772
475 4889
475 4964
476 4
476 10
476 21
476 25
476 68
476 158
476 356
476 477
476 793
476 889
476 946
476 1091
476 1488
476 1928
476 2665
476 3772
477 7
477 10
477 79
477 184
477 476
477 1213
477 1521
477 1970
477 4102
477 4947
478 22
478 46
478 64
478 405
478 794
478 1121
478 1607
478 1937
478 2200
478 2404
478 3410
478 3571
478 4521
479 14
479 16
479 97
479 104
479 273
479 1127
479 1203
479 1431
479 1928
479 2017
479 2933
479 3389
479 4474
480 3
480 4
480 54
480 81
480 414
480 1837
480 2741
480 3139
480 3375
480 4272
481 2
481 14
481 105
481 316
481 363
481 421
481 433
481 557
481 776
481 836
481 2037
481 2087
481 2579
481 3184
481 3671
481 3930
481 4288
481 4655
482 25
482 45
482 54
482 184
482 262
482 380
482 468
482 548
482 646
482 716
482 934
482 999
482 1550
482 1728
482 1859
482 2322
482 2859
482 3173
482 3506
482 4211
482 4344
482 4377
482 4482
482 4688
482 4846
483 8
483 20
483 25
483 369
483 393
483 749
483 1582
483 2572
483 2760
483 3210
484 0
484 11
484 43
484 64
484 100
484 144
484 230
484 549
484 611
484 766
484 862
484 953
484 1109
484 1276
484 1567
484 1600
484 2531
484 2621
484 2659
484 3414
484 3747
484 4292
485 13
485 19
485 49
485 106
485 179
485 210
485 349
485 367
485 749
485 1026
485 1094
485 1907
485 2018
485 3003
485 3040
485 3068
485 3414
485 3511
485 3705
485 3749
485 3883
485 4920
486 73
486 101
486 167
486 365
486 503
486 1019
486 1575
486 1752
486 3385
486 4360
486 4547
486 4677
486 4980
487 2
487 16
487 18
487 20
487 112
487 189
487 225
487 655
487 949
487 1408
487 1690
487 1957
487 2568
487 2633
487 3211
487 3650
487 4087
487 4120
487 4291
487 4489
487 4742
488 12
488 17
488 45
488 77
488 202
488 249
488 282
488 475
488 914
488 1421
488 1639
488 1660
488 1666
488 1840
488 2089
488 2167
488 2332
488 2466
488 2656
488 3310
488 3576
488 3755
488 3881
488 4572
488 4703
489 4
489 5
489 10
489 193
489 264
489 419
489 1268
489 2505
489 2779
489 2847
489 3233
489 3416
489 4450
490 22
490 100
490 178
490 223
490 346
490 442
490 597
490 775
490 1677
490 1759
490 1849
490 2011
490 2127
490 2507
490 2538
490 2848
490 2883
490 2955
490 3917
490 4001
490 4290
490 4467
490 4900
490 4962
491 9
491 54
491 75
491 133
491 871
491 3943
492 114
492 991
492 1208
492 4401
492 4686
493 27
493 84
493 93
493 116
493 179
493 505
493 540
493 622
493 933
493 1115
493 1212
493 1330
493 1414
493 1568
493 2047
493 2992
493 3428
493 3513
493 4636
493 4853
494 0
494 9
494 102
494 193
494 302
494 354
494 705
494 1534
494 3885
494 4061
494 4168
494 4259
494 4661
494 4820
495 2
495 10
495 62
495 83
495 144
495 199
495 559
495 594
495 617
495 779
495 878
495 883
495 1033
495 1053
495 1233
495 1246
495 1689
495 2132
495 2253
495 2277
495 2398
495 2730
495 2765
495 3079
495 3101
495 3266
495 3755
495 4311
495 4612
495 4890
496 25
496 121
496 260
496 301
496 345
496 629
496 802
496 1366
496 1505
496 1799
496 2553
496 2642
496 2748
496 3166
496 3259
496 3457
496 3483
496 3913
496 4316
497 2
497 21
497 37
497 42
497 86
497 266
497 512
497 664
497 826
497 1038
497 1112
497 1147
497 1370
497 1393
497 1487
497 1959
497 2070
497 2224
497 2278
497 2423
497 2538
497 2994
497 3422
497 4845
498 6
498 49
498 56
498 57
498 65
498 144
498 151
498 599
498 618
498 636
498 813
498 1093
498 1274
498 1472
498 1668
498 1685
498 1692
498 1725
498 1903
498 2370
498 2715
498 2804
498 3239
498 3606
498 3804
498 4205
498 4311
499 28
499 160
499 181
499 380
499 1496
499 1626
499 2148
499 3181
499 3719
500 2
500 18
500 19
500 24
500 146
500 336
500 611
500 681
500 794
500 798
500 897
500 901
500 955
500 1022
500 1043
500 1210
500 1357
500 1365
500 2050
500 2056
500 2099
500 2241
500 2314
500 2322
500 2448
500 2660
500 3041
500 3193
500 3936
500 4309
500 4312
500 4552
500 4824
501 51
501 63
501 362
501 389
501 459
501 533
501 673
501 810
501 840
501 916
501 1171
501 1228
501 1392
501 2278
501 3120
501 3378
501 3581
501 3776
501 3927
501 4658
502 0
502 3
502 25
502 156
502 179
502 349
502 715
502 1038
502 1443
502 1771
502 2536
502 2735
502 2782
502 4097
502 4119
502 4524
502 4753
503 2
503 9
503 21
503 39
503 56
503 104
503 153
503 486
503 671
503 1262
503 1507
503 1667
503 1957
503 2376
503 2438
503 3540
503 3543
503 4010
503 4139
503 4818
504 0
504 75
504 95
504 158
504 430
504 467
504 506
504 751
504 786
504 827
504 1098
504 1225
504 1290
504 1390
504 1543
504 1574
504 2058
504 2351
504 3054
504 3189
504 3299
504 3381
504 3427
504 4554
504 4853
505 14
505 15
505 35
505 56
505 130
505 252
505 393
505 493
505 519
505 667
505 674
505 738
505 838
505 1004
505 1083
505 1123
505 1311
505 1483
505 1505
505 1712
505 1751
505 1783
505 2370
505 2412
505 2453
505 2619
505 2712
505 3173
505 3312
505 3607
505 3899
505 4003
505 4278
506 3
506 5
506 8
506 56
506 100
506 258
506 432
506 504
506 548
506 556
506 749
506 850
506 1048
506 1440
506 1525
506 1536
506 1612
506 1743
506 2542
506 2555
506 2781
506 2980
506 2988
506 3388
506 3676
506 4146
506 4378
506 4483
506 4507
506 4739
506 4785
506 4811
507 18
507 121
507 124
507 135
507 151
507 512
507 1840
507 2762
507 4833
508 14
508 40
508 64
508 309
508 343
508 443
508 881
508 1902
508 2570
508 3748
508 4413
508 4551
509 2
509 7
509 52
509 87
509 101
509 104
509 148
509 373
509 530
509 630
509 658
509 686
509 858
509 1222
509 1538
509 1547
509 1742
509 2286
509 2427
509 2488
509 2502
509 2508
509 2926
509 3228
509 3250
509 3471
509 3494
509 3517
509 3547
509 3978
509 4138
509 4212
509 4321
509 4750
509 4768
509 4946
510 1
510 4
510 8
510 200
510 561
510 1384
510 1450
510 1527
510 3338
510 3483
510 3555
511 3
511 18
511 106
511 144
511 187
511 215
511 240
511 258
511 623
511 689
511 917
511 1051
511 1087
511 1241
511 1503
511 1885
511 2307
511 3131
511 3221
511 3304
511 3480
511 3673
511 4170
511 4291
511 4640
511 4686
511 4872
512 14
512 20
512 72
512 305
512 358
512 426
512 446
512 497
512 507
512 612
512 704
512 1011
512 1776
512 2006
512 2176
512 2266
512 2957
512 3046
512 3695
513 19
513 33
513 345
513 733
513 895
513 1507
513 3845
514 10
514 14
514 18
514 43
514 47
514 56
514 93
514 308
514 420
514 617
514 632
514 703
514 719
514 738
514 773
514 1185
514 1205
514 1435
514 1675
514 1818
514 1881
514 2157
514 2492
514 3387
514 3937
515 13
515 85
515 95
515 142
515 221
515 551
515 621
515 886
515 938
515 1014
515 1287
515 1461
515 1592
515 2135
515 2136
515 2149
515 2346
515 2654
515 2731
515 3040
515 3072
515 3372
515 3399
515 3626
515 4148
515 4358
515 4788
516 3
516 7
516 60
516 91
516 187
516 280
516 1706
516 1952
516 4012
516 4736
517 2
517 49
517 59
517 88
517 104
517 118
517 187
517 265
517 576
517 586
517 1105
517 1196
517 1202
517 1212
517 1266
517 1827
517 2216
517 2330
517 2350
517 2806
517 2813
517 3161
517 3193
517 3215
517 3447
517 3538
517 3577
517 3767
517 3785
517 4797
517 4944
518 17
518 28
518 199
518 585
518 975
518 2487
518 3490
519 0
519 8
519 10
519 25
519 197
519 333
519 505
519 520
519 757
519 799
519 1048
519 1457
519 1859
519 2250
519 2310
519 2499
519 2649
519 3164
519 3195
519 3350
519 3459
519 4067
519 4432
519 4671
520 22
520 47
520 50
520 161
520 193
520 424
520 519
520 1124
520 1282
520 1922
520 1962
520 2178
520 2357
520 2780
520 2790
520 3095
520 3127
520 3861
520 4359
520 4920
521 8
521 63
521 123
521 330
522 5
522 6
522 10
522 227
522 284
522 287
522 339
522 650
522 810
522 945
522 1192
522 1372
522 1665
522 1757
522 1764
522 2553
522 2592
522 2651
522 2863
522 3100
522 3150
522 3401
522 3520
522 3743
522 4098
522 4555
522 4567
522 4741
523 35
523 65
523 220
523 225
523 279
523 410
523 587
523 1298
523 1629
523 4854
523 4924
524 1
524 8
524 14
524 121
524 302
524 348
524 467
524 608
524 684
524 737
524 914
524 970
524 1240
524 1347
524 1936
524 2027
524 2052
524 2156
524 2260
524 3041
524 3095
524 3267
524 3322
524 3553
524 4161
524 4314
524 4510
524 4740
525 14
525 19
525 79
525 97
525 251
525 570
525 615
525 824
525 879
525 983
525 1003
525 1265
525 1394
525 1445
525 1730
525 2055
525 2334
525 2521
525 2605
525 2703
525 2900
525 3032
525 3707
525 3953
525 4675
526 0
526 4
526 7
526 10
526 136
526 220
526 409
526 534
526 1216
526 1319
526 1401
526 2022
526 2465
526 3118
527 0
527 7
527 47
527 84
527 324
527 351
527 409
527 1480
527 2563
527 2850
527 3212
527 3300
527 4046
527 4099
527 4897
528 10
528 19
528 94
528 140
528 366
528 614
528 1591
528 2004
528 3198
529 32
529 93
529 193
529 196
529 203
529 265
529 394
529 467
529 867
529 1203
529 1624
529 3368
529 4300
529 4456
530 0
530 7
530 10
530 19
530 189
530 285
530 509
530 664
530 932
530 1388
530 1751
530 2117
530 2809
531 0
531 1
531 6
531 12
531 59
531 318
531 328
531 409
531 669
531 1240
531 1631
531 2234
531 2256
531 2375
531 2699
531 3324
531 4000
532 1
532 64
532 185
532 314
532 385
532 774
532 1616
532 1933
532 2375
532 3319
532 3471
533 0
533 16
533 25
533 32
533 77
533 501
533 700
533 728
533 747
533 928
533 986
533 1073
533 1584
533 1802
533 1808
533 1954
533 2084
533 2120
533 2287
533 2296
533 2583
533 2797
533 2848
533 3244
533 3309
533 3580
533 3766
533 4019
533 4341
533 4445
533 4844
533 4945
534 6
534 10
534 134
534 220
534 253
534 369
534 431
534 526
534 1188
534 1243
534 1943
534 2399
534 2464
534 2511
535 6
535 41
535 881
535 1112
535 1880
536 9
536 12
536 17
536 156
536 1065
536 2129
536 3440
536 4809
537 18
537 21
537 29
537 52
537 138
537 165
537 249
537 620
537 689
537 771
537 947
537 988
537 1139
537 1286
537 1308
537 1401
537 1519
537 1848
537 2151
537 2294
537 2544
537 2577
537 3155
537 3198
537 3311
537 3437
537 3461
537 4043
537 4726
537 4862
537 4863
537 4881
537 4888
538 8
538 66
538 99
538 225
538 969
538 1377
538 1969
538 2438
538 3354
538 4279
539 0
539 4
539 161
539 241
539 908
539 4060
539 4241
540 7
540 14
540 19
540 70
540 244
540 493
540 726
540 735
540 923
540 1135
540 1315
540 1357
540 1606
540 2219
540 2229
540 2260
540 3656
540 3921
540 4075
540 4245
540 4368
540 4765
541 32
541 45
541 65
541 88
541 96
541 145
541 161
541 354
541 558
541 574
541 729
541 756
541 804
541 970
541 1159
541 1220
541 1270
541 1409
541 1812
541 1815
541 1892
541 2301
541 2666
541 2717
541 2968
541 2973
541 3444
541 4094
541 4124
541 4222
541 4419
541 4470
541 4715
542 38
542 138
542 362
542 731
542 1003
542 1280
542 2807
542 4808
543 11
543 13
543 167
543 207
543 229
543 242
543 307
543 1350
543 2016
543 3261
543 3964
543 3970
544 7
544 32
544 113
544 151
544 230
544 333
544 449
544 571
544 1187
544 1365
544 1926
544 2004
544 3110
544 4383
544 4506
544 4674
544 4898
545 0
545 5
545 14
545 15
545 78
545 85
545 825
545 1506
545 1613
545 1796
545 2344
545 2611
545 3119
545 3307
545 3788
545 4063
545 4065
546 7
546 312
546 321
546 1310
546 1582
546 2407
546 2897
546 3166
546 4168
547 10
547 12
547 186
547 279
547 419
547 463
547 562
547 822
547 1074
547 1119
547 1438
547 2809
547 2943
547 3166
547 3658
547 4405
547 4555
548 86
548 131
548 383
548 482
548 506
548 605
548 2333
548 2739
548 2802
548 3642
548 4607
548 4830
549 2
549 5
549 19
549 187
549 484
549 690
549 729
549 883
549 1439
549 1467
549 3204
549 3299
549 3519
550 8
550 11
550 30
550 43
550 98
550 225
550 1470
550 2492
550 2751
550 3121
551 7
551 12
551 18
551 76
551 150
551 298
551 430
551 515
551 789
551 816
551 1081
551 1458
551 1896
551 3063
551 3085
551 3244
551 4213
551 4299
551 4557
551 4810
552 13
552 47
552 95
552 366
552 408
552 1436
552 3551
553 2
553 7
553 10
553 166
553 370
553 1374
553 1405
553 1537
553 2339
554 40
554 44
554 67
554 89
554 133
554 167
554 223
554 225
554 300
554 367
554 561
554 567
554 650
554 735
554 813
554 1126
554 1915
554 2306
554 2321
554 2457
554 2561
554 2705
554 2768
554 3352
554 3459
554 3748
554 3790
554 4524
554 4961
554 4985
555 3
555 8
555 16
555 75
555 202
555 208
555 221
555 225
555 848
555 900
555 1738
555 1866
555 1967
555 2760
555 3049
555 3185
555 3553
555 3687
555 4206
555 4600
555 4618
556 16
556 49
556 257
556 402
556 433
556 506
556 623
556 624
556 985
556 1167
556 1351
556 2014
556 2204
556 2441
556 2600
556 3059
556 4391
556 4943
557 4
557 5
557 35
557 106
557 287
557 408
557 459
557 481
557 587
557 647
557 783
557 810
557 957
557 1200
557 1379
557 1639
557 1799
557 2707
557 3211
557 3268
557 3300
557 3410
557 3424
557 3452
557 3725
557 4447
557 4465
557 4670
557 4745
558 15
558 19
558 208
558 268
558 278
558 541
558 652
558 797
558 878
558 1061
558 1317
558 2312
558 2593
559 12
559 332
559 495
559 668
559 791
559 1284
559 1426
559 2676
559 3481
559 3576
559 3929
560 3
560 12
560 18
560 72
560 146
560 383
560 386
560 397
560 625
560 785
560 822
560 1175
560 1284
560 1374
560 1435
560 2564
560 3286
560 3360
560 3694
560 4159
561 1
561 4
561 19
561 21
561 195
561 324
561 510
561 554
561 574
561 872
561 909
561 913
561 972
561 977
561 1362
561 2343
561 2355
561 3047
561 3738
561 4505
561 4998
562 20
562 44
562 85
562 142
562 315
562 326
562 547
562 785
562 795
562 1770
562 1948
562 3067
562 3276
562 3579
562 3689
563 12
563 18
563 44
563 118
563 131
563 326
563 332
563 890
563 952
563 1031
563 4150
563 4579
564 2
564 13
564 21
564 328
564 344
564 926
564 940
564 1960
564 1968
564 2104
564 2975
564 3149
564 3918
565 1
565 14
565 19
565 120
565 159
565 1765
565 2489
566 17
566 46
566 47
566 128
566 314
566 362
566 826
566 864
566 883
566 930
566 995
566 1086
566 1100
566 1759
566 1795
566 2188
566 2367
566 2503
566 2751
566 2794
566 2813
566 2954
566 2983
566 3085
566 3330
566 3357
566 3390
566 3510
566 4019
566 4632
566 4682
567 8
567 15
567 31
567 58
567 95
567 146
567 262
567 554
567 721
567 944
567 1106
567 1630
567 1668
567 1727
567 1888
567 2406
567 2560
567 2598
567 3933
567 4709
568 6
568 18
568 21
568 162
568 187
568 1718
568 2116
568 2849
568 3609
569 1
569 12
569 13
569 91
569 230
569 285
569 308
569 761
569 924
569 930
569 949
569 1418
569 1452
569 1579
569 1876
569 1919
569 2127
569 3105
569 3300
569 3834
569 4414
569 4602
569 4616
569 4675
569 4830
570 5
570 6
570 18
570 22
570 29
570 32
570 42
570 207
570 525
570 1018
570 1029
570 1481
570 1494
570 1722
570 1777
570 1932
570 2408
570 2596
570 2738
570 2846
570 3674
570 3856
570 3951
570 4227
570 4973
571 11
571 12
571 33
571 269
571 399
571 423
571 544
571 646
571 672
571 1228
571 1406
571 1771
571 2363
571 2697
571 2769
571 3318
571 3360
571 3449
571 3965
572 33
572 35
572 249
572 975
572 1667
572 1703
572 1804
572 2144
572 2183
572 2450
572 2912
572 2947
572 3854
572 4086
572 4627
572 4948
573 3
573 4
573 467
573 727
573 755
573 1555
573 3518
574 60
574 142
574 185
574 195
574 336
574 541
574 561
574 961
574 1485
574 1515
574 2349
574 2698
574 3080
574 3306
574 3690
574 4115
574 4530
575 0
575 9
575 12
575 91
575 207
575 241
575 637
575 1231
575 1799
575 1890
575 2372
575 2639
575 2883
575 3096
575 3435
575 3696
575 4799
576 10
576 19
576 21
576 36
576 122
576 154
576 517
576 1977
576 2101
576 2235
576 2588
576 3229
576 3748
576 3769
576 4231
576 4401
576 4775
577 12
577 25
577 27
577 30
577 34
577 88
577 150
577 451
577 784
577 867
577 1635
577 1878
577 2900
577 2914
577 3023
577 3439
577 4430
578 15
578 66
578 74
578 126
578 329
578 335
578 1088
578 1303
578 1942
578 2706
579 0
579 11
579 46
579 84
579 247
579 326
579 388
579 661
579 1092
579 1164
579 1168
579 1429
579 1902
579 2877
579 3165
579 4392
579 4808
579 4862
580 2
580 35
580 46
580 48
580 679
580 696
580 3652
581 0
581 4
581 5
581 11
581 344
581 1001
581 1476
581 4171
581 4245
581 4587
581 4612
582 14
582 16
582 79
582 350
582 425
582 1014
582 1340
582 2273
583 2
583 4
583 15
583 43
583 60
583 123
583 167
583 237
583 591
583 655
583 900
583 935
583 1189
583 1456
583 1492
583 1720
583 1796
583 1868
583 2040
583 2485
583 4073
583 4239
583 4485
583 4604
584 16
584 27
584 154
584 244
584 1943
584 2713
585 32
585 40
585 46
585 75
585 129
585 159
585 161
585 300
585 518
585 611
585 867
585 927
585 2081
585 3150
585 3962
586 14
586 117
586 195
586 243
586 364
586 517
586 1169
586 1549
586 1657
586 3342
586 4773
586 4959
587 16
587 24
587 47
587 124
587 199
587 523
587 557
587 685
587 1061
587 2330
587 2684
587 2925
587 4057
587 4134
588 0
588 386
588 387
588 1216
588 1346
588 2367
588 2754
589 2
589 5
589 7
589 10
589 19
589 22
589 232
589 662
589 781
589 895
589 1156
589 2618
589 2755
589 3139
589 3140
589 3256
589 3433
589 4187
589 4217
589 4626
589 4768
590 0
590 12
590 14
590 794
590 1347
590 1986
590 2219
590 2686
590 3573
590 4258
591 2
591 42
591 72
591 82
591 98
591 583
591 738
591 773
591 1206
591 1620
591 1668
591 1717
591 1884
591 1886
591 2170
591 2989
591 3097
591 3574
591 3628
591 3850
591 3913
591 3972
591 4756
591 4870
592 0
592 40
592 45
592 63
592 96
592 102
592 689
592 763
592 1354
592 1502
592 1507
592 2572
592 2894
593 11
593 32
593 53
593 120
593 4044
594 3
594 6
594 495
594 762
594 1893
594 3793
594 4064
594 4330
595 12
595 20
595 34
595 413
595 1183
595 2018
595 2025
595 2775
595 3239
595 4006
595 4305
595 4326
596 0
596 2
596 5
596 21
596 71
596 299
596 393
596 435
596 996
596 1007
596 1071
596 1146
596 1206
596 1252
596 1578
596 2237
596 2249
596 2423
596 2487
596 3082
596 3668
596 4572
596 4620
596 4960
597 2
597 5
597 15
597 149
597 226
597 490
597 754
597 756
597 868
597 1036
597 1232
597 1353
597 1525
597 1541
597 1697
597 1796
597 2485
597 3038
597 3201
597 3411
597 3458
597 3485
597 3652
597 3781
597 3900
597 4106
597 4168
597 4322
597 4566
597 4586
598 16
598 35
598 159
598 687
598 706
598 814
598 2165
598 2501
598 2736
598 2880
598 3631
599 23
599 62
599 82
599 252
599 498
599 929
599 1058
599 1362
599 2448
599 2823
599 3044
599 3117
599 3402
599 3619
599 3784
599 3856
599 4256
600 23
600 79
600 148
600 248
600 378
600 2575
600 2933
600 3087
600 3236
600 3317
600 4459
601 2
601 40
601 73
601 266
601 472
601 1210
601 1268
601 1331
601 1366
601 1467
601 1678
601 1778
601 2442
601 2495
601 3099
601 4627
601 4925
602 0
602 1
602 22
602 32
602 48
602 91
602 305
602 619
602 645
602 677
602 704
602 797
602 853
602 1036
602 1123
602 1387
602 1519
602 1579
602 1613
602 1652
602 1715
602 1818
602 2291
602 2298
602 2658
602 2998
602 3150
602 3257
602 3301
602 3358
602 3600
602 3852
602 4039
602 4056
602 4109
602 4129
602 4260
602 4898
603 3
603 4
603 5
603 18
603 66
603 100
603 387
603 465
603 608
603 949
603 1014
603 1236
603 1313
603 1351
603 1713
603 1762
603 2094
603 2370
603 2639
603 2694
603 2701
603 3176
603 3237
603 3668
603 4203
603 4534
604 3
604 14
604 64
604 102
604 151
604 460
604 658
604 732
604 816
604 1752
604 1927
604 1969
604 2134
604 2574
604 3010
604 3114
604 3274
604 3572
604 3977
604 4525
604 4580
605 10
605 13
605 14
605 35
605 221
605 339
605 444
605 548
605 613
605 796
605 909
605 1088
605 1101
605 1333
605 1944
605 2510
605 3033
605 4277
606 85
606 109
606 204
606 384
606 968
606 2633
606 2784
606 4749
607 23
607 108
607 123
607 229
607 295
607 321
607 919
607 976
607 1049
607 1272
607 1354
607 1713
607 1762
607 2063
607 2704
607 3229
607 3390
607 4907
607 4924
607 4932
608 86
608 524
608 603
608 660
608 760
608 836
608 1098
608 2988
608 4311
609 12
609 44
609 118
609 464
609 1020
609 1818
609 2097
609 2445
609 4181
609 4549
610 0
610 63
610 84
610 109
610 225
610 244
610 283
610 295
610 326
610 426
610 740
610 887
610 1146
610 1749
610 1901
610 3729
610 3975
610 4231
611 14
611 40
611 45
611 484
611 500
611 585
611 776
611 1089
611 1141
611 1248
611 1475
611 1492
611 1960
611 2160
611 2247
611 2487
611 3213
611 3356
611 4388
612 1
612 7
612 37
612 68
612 277
612 349
612 395
612 512
612 627
612 660
612 793
612 870
612 1192
612 1343
612 1579
612 2455
612 2773
612 2923
612 3203
612 3886
612 4168
612 4449
612 4615
612 4731
613 4
613 8
613 19
613 66
613 109
613 182
613 605
613 628
613 648
613 934
613 1752
613 4160
613 4208
613 4408
614 10
614 37
614 69
614 246
614 528
614 638
614 724
614 973
614 1018
614 1027
614 1075
614 1156
614 1283
614 1334
614 1665
614 1763
614 2543
614 2570
614 2601
614 2773
614 3350
614 3818
614 4480
614 4771
615 0
615 6
615 74
615 201
615 410
615 459
615 525
615 826
615 907
615 1246
615 1414
615 2018
615 2092
615 2217
615 2292
615 2347
615 2439
615 2585
615 2727
615 2829
615 3236
615 3616
615 3961
615 3975
615 4092
615 4246
615 4305
616 35
616 94
616 114
616 188
616 336
616 648
616 721
616 753
616 779
616 942
616 1019
616 1140
616 1318
616 1802
616 1864
616 3379
616 3670
616 4852
617 1
617 10
617 13
617 131
617 150
617 314
617 347
617 430
617 495
617 514
617 1101
617 1116
617 1340
617 1601
617 1807
617 3665
617 4240
617 4831
618 22
618 90
618 205
618 224
618 292
618 444
618 498
618 685
618 761
618 845
618 878
618 1136
618 1623
618 2074
618 2525
618 3746
618 4373
618 4599
619 1
619 170
619 207
619 323
619 602
619 1407
620 6
620 19
620 187
620 189
620 216
620 537
620 2298
620 2992
621 11
621 17
621 26
621 60
621 309
621 515
621 947
621 1615
621 1704
621 2661
621 2831
621 3136
621 4575
621 4939
622 12
622 36
622 237
622 355
622 493
622 963
622 1134
622 1840
622 1858
622 2429
622 2845
622 3510
622 3814
622 4317
623 6
623 11
623 14
623 49
623 101
623 136
623 511
623 556
623 975
623 1345
623 1904
623 1999
623 2575
623 2955
623 3730
623 4011
623 4095
623 4264
623 4316
623 4562
623 4614
623 4622
623 4625
624 10
624 49
624 199
624 201
624 229
624 556
624 740
624 853
624 983
624 1011
624 1116
624 1350
624 1406
624 1508
624 1539
624 1742
624 1847
624 1878
624 2048
624 2778
624 3198
624 3962
624 4398
625 11
625 175
625 418
625 560
625 2440
625 2701
625 3455
626 1
626 3
626 5
626 9
626 16
626 27
626 102
626 176
626 237
626 453
626 1766
626 4729
626 4902
627 2
627 174
627 612
627 796
627 1776
627 2503
627 2827
627 4813
628 17
628 44
628 138
628 154
628 182
628 613
628 693
628 902
628 1011
628 1064
628 1138
628 1477
628 1828
628 2914
628 3395
628 3692
628 4668
628 4854
629 13
629 18
629 19
629 31
629 59
629 236
629 393
629 496
629 638
629 1354
629 1379
629 1503
629 1542
629 1702
629 2166
629 2171
629 2227
629 2326
629 2634
629 3680
629 4210
629 4403
630 14
630 374
630 509
630 955
630 1474
630 1609
630 2002
630 2274
630 2456
630 2768
630 3273
630 3504
631 5
631 14
631 40
631 382
631 467
631 1099
631 1788
631 2727
631 3180
631 4662
632 3
632 15
632 18
632 160
632 179
632 189
632 217
632 514
632 1037
632 1117
632 1135
632 1188
632 1830
632 1874
632 1974
632 2128
632 2177
632 2673
632 3098
632 3728
632 4223
632 4373
632 4509
632 4619
632 4878
633 0
633 5
633 19
633 66
633 175
633 314
633 910
633 950
633 1067
633 1321
633 1347
633 1665
633 2297
633 3085
633 3158
633 3674
633 4803
634 2
634 4
634 10
634 28
634 90
634 122
634 443
634 898
634 1353
634 2128
634 2824
634 2946
634 3912
634 4782
635 9
635 84
635 149
635 189
635 675
635 1261
635 1785
635 2163
635 2340
635 2482
635 2616
635 3423
635 4152
635 4739
636 7
636 9
636 498
636 2017
636 2139
636 2508
637 2
637 10
637 18
637 27
637 97
637 260
637 292
637 325
637 332
637 464
637 575
637 1418
637 1852
637 1913
637 1966
637 2390
637 2876
637 3302
637 4781
638 76
638 84
638 102
638 147
638 334
638 349
638 614
638 629
638 1052
638 1277
638 1356
638 1816
638 2133
638 2134
638 3469
638 3935
638 4032
638 4144
638 4271
638 4297
639 3
639 4
639 17
639 23
639 37
639 329
639 359
639 459
639 641
639 1069
639 1722
639 2068
639 2590
639 3071
639 3536
639 4346
639 4754
640 3
640 10
640 40
640 57
640 215
640 223
640 289
640 426
640 785
640 1278
640 1871
640 2002
640 2595
640 3048
640 3881
640 4380
640 4851
641 44
641 56
641 262
641 334
641 456
641 639
641 698
641 979
641 1187
641 1486
641 1534
641 1564
641 1757
641 1809
641 2087
641 2322
641 2694
641 2946
641 3514
641 3819
641 4407
641 4502
641 4528
642 0
642 12
642 89
642 143
642 282
642 843
642 866
642 2255
642 2383
642 2816
642 3051
642 3359
643 5
643 361
643 1057
643 1586
643 1688
643 2010
643 3333
644 6
644 193
644 296
644 303
644 1899
644 2008
645 193
645 282
645 407
645 602
645 765
645 1235
645 1912
645 2713
645 3336
645 4128
645 4945
646 9
646 14
646 113
646 174
646 482
646 571
646 1590
646 1722
646 1922
646 2240
646 2403
646 2656
646 2990
646 3316
646 3582
646 4331
647 383
647 557
647 800
647 1567
647 1652
647 1852
648 0
648 20
648 48
648 118
648 274
648 397
648 430
648 613
648 616
648 660
648 843
648 942
648 1065
648 1380
648 1621
648 1693
648 1973
648 2050
648 2265
648 2925
648 2972
648 3048
648 3477
648 3772
648 3914
648 4067
649 17
649 456
649 474
649 2479
649 2564
649 2931
649 3725
649 3948
649 4438
649 4695
650 0
650 102
650 112
650 262
650 438
650 522
650 554
650 724
650 1308
650 2302
650 2856
650 3206
650 3271
650 3521
650 3598
650 3851
650 4922
650 4952
651 8
651 10
651 13
651 14
651 19
651 114
651 896
651 1790
651 1804
651 2101
651 2372
651 3203
651 4291
651 4888
652 91
652 146
652 466
652 558
652 1500
652 1555
652 2162
652 3655
652 3702
653 4
653 13
653 17
653 18
653 25
653 129
653 150
653 287
653 689
653 799
653 1046
653 1445
653 1618
653 2085
653 2275
653 3028
653 4428
654 1
654 14
654 58
654 88
654 765
654 876
654 1237
654 2787
654 3793
654 4143
655 22
655 105
655 134
655 166
655 192
655 487
655 583
655 1045
655 1142
655 1310
655 1332
655 1345
655 1501
655 3881
655 3901
655 4146
655 4619
656 0
656 17
656 19
656 52
656 174
656 258
656 471
656 877
656 1207
656 1416
656 1542
656 1625
656 1714
656 1813
656 2376
656 2439
656 2723
656 2837
656 3573
656 3683
656 3795
656 3877
656 4082
656 4507
656 4787
657 1
657 66
657 279
657 345
657 1084
657 1561
657 1720
657 4949
658 63
658 85
658 151
658 233
658 509
658 604
658 1114
658 1734
658 2277
658 2685
658 3047
658 3113
658 3255
658 4738
659 45
659 159
659 452
659 4046
660 1
660 63
660 608
660 612
660 648
660 728
660 841
660 1129
660 1650
660 2268
660 2492
660 2586
660 2961
660 3747
660 3916
660 4056
661 10
661 44
661 76
661 86
661 111
661 161
661 175
661 579
661 860
661 1958
661 1996
661 2428
661 2548
661 2905
661 3351
661 3492
661 4802
662 2
662 33
662 63
662 162
662 328
662 337
662 589
662 803
662 948
662 2043
662 2366
662 2704
662 2839
662 3008
662 3408
662 3799
662 4161
662 4310
662 4812
663 8
663 189
663 306
663 1190
663 2264
663 2351
663 2422
663 2700
663 3082
663 3184
663 3518
663 3838
663 4757
664 6
664 59
664 92
664 164
664 397
664 497
664 530
664 781
664 835
664 964
664 1081
664 1160
664 1305
664 1419
664 1563
664 1621
664 1638
664 1770
664 2067
664 2158
664 2667
664 3336
664 3375
664 3565
664 4121
665 35
665 60
665 81
665 283
665 360
665 701
665 893
665 1821
665 2255
665 2392
665 2978
665 3130
665 4048
666 17
666 19
666 186
666 221
666 1227
666 1891
666 2618
666 2839
666 2902
666 3306
666 3564
666 4013
666 4477
667 7
667 25
667 86
667 131
667 165
667 345
667 505
667 906
667 1521
667 2020
667 3364
667 4436
668 4
668 5
668 7
668 49
668 63
668 95
668 187
668 327
668 349
668 559
668 1445
668 1709
668 1815
668 1845
668 2061
668 2140
668 2474
668 2939
668 2941
668 3242
668 3352
668 3582
668 3600
668 3710
668 3927
668 4132
669 4
669 14
669 17
669 23
669 41
669 531
669 1017
669 1049
669 1877
669 2365
669 2620
669 3396
669 4440
669 4904
670 1
670 330
670 344
670 440
670 1226
670 1389
670 1951
670 2383
670 2684
670 3222
670 4035
671 0
671 75
671 84
671 118
671 151
671 159
671 202
671 322
671 503
671 1607
671 2070
671 2090
671 2152
671 3270
671 4266
671 4775
671 4876
672 12
672 14
672 70
672 84
672 194
672 285
672 472
672 571
672 1038
672 1150
672 1374
672 1947
672 2904
672 3440
672 3570
672 3737
672 3994
672 4076
672 4267
672 4512
673 64
673 126
673 171
673 501
673 4778
674 12
674 23
674 32
674 49
674 106
674 351
674 414
674 505
674 854
674 863
674 945
674 984
674 1085
674 1221
674 1373
674 1503
674 1575
674 1948
674 2174
674 2202
674 2346
674 2607
674 2664
674 2940
674 3074
674 3150
674 3227
674 3715
674 4601
674 4979
675 1
675 14
675 207
675 216
675 265
675 371
675 635
675 703
675 844
675 943
675 2295
675 4042
675 4280
676 16
676 17
676 37
676 41
676 207
676 721
676 821
676 861
676 1080
676 1200
676 1872
676 2470
676 2577
676 3057
676 3360
676 3443
676 4219
676 4595
676 4600
676 4883
677 30
677 45
677 63
677 148
677 150
677 181
677 328
677 602
677 697
677 841
677 1098
677 1184
677 1318
677 1330
677 1416
677 1721
677 1809
677 2238
677 2629
677 2634
677 2973
677 3022
677 3842
678 5
678 13
678 239
678 2553
678 2665
678 2970
679 2
679 12
679 20
679 52
679 98
679 118
679 220
679 242
679 332
679 580
679 853
679 984
679 1013
679 1154
679 1334
679 1335
679 1435
679 1613
679 1632
679 1699
679 1704
679 1805
679 1878
679 2028
679 2039
679 2501
679 2572
679 2810
679 2960
679 3126
679 3142
679 3401
679 4100
679 4410
679 4939
680 7
680 322
680 343
680 380
680 1399
680 3789
681 2
681 54
681 61
681 500
681 1879
681 3003
681 3095
681 3976
681 4119
681 4413
682 5
682 74
682 430
682 858
682 1464
682 1594
682 1735
682 1867
682 2507
682 2824
682 3200
682 4082
682 4427
682 4684
682 4770
682 4869
683 3
683 12
683 15
683 56
683 143
683 171
683 207
683 904
683 928
683 1022
683 1349
683 1385
683 2148
683 2204
683 2322
683 2496
683 2762
683 2997
683 4513
684 6
684 199
684 246
684 524
684 688
684 882
684 1254
684 1742
684 1903
684 3002
684 3911
684 4832
685 5
685 51
685 365
685 463
685 587
685 618
685 734
685 1158
685 1261
685 1758
685 1867
685 1877
685 2798
685 3366
685 3753
685 4531
685 4946
686 1
686 25
686 28
686 56
686 257
686 292
686 378
686 509
686 691
686 1326
686 1535
686 1541
686 3600
686 3951
686 4352
686 4887
687 6
687 225
687 307
687 362
687 598
687 1392
687 3402
687 3835
688 17
688 33
688 94
688 155
688 225
688 350
688 684
688 865
688 938
688 1311
688 1398
688 1427
688 1886
688 1958
688 2158
688 2301
688 2442
688 2579
688 2699
688 3405
688 3608
688 4005
688 4774
688 4827
689 65
689 150
689 273
689 511
689 537
689 592
689 653
689 909
689 1131
689 1593
689 1896
689 2190
689 2232
689 2526
689 2680
689 3204
689 3569
689 3859
690 0
690 4
690 261
690 441
690 549
690 1379
690 1380
690 3086
690 4101
691 17
691 27
691 138
691 148
691 257
691 259
691 369
691 686
691 914
691 1563
691 1602
691 1660
691 2049
691 2342
691 2818
691 2976
691 3855
691 3937
691 3989
692 7
692 164
692 335
692 419
692 1607
692 2099
692 2104
692 2741
692 2992
692 3417
692 3838
693 55
693 74
693 154
693 222
693 295
693 628
693 728
693 1295
693 1754
693 1757
693 4693
694 24
694 226
694 257
694 1493
694 2321
694 2476
694 2857
694 3443
694 4448
695 3
695 18
695 89
695 150
695 162
695 182
695 212
695 247
695 276
695 305
695 711
695 1075
695 1201
695 1418
695 1529
695 2241
695 2412
695 2473
695 2950
695 3755
695 3941
695 4211
695 4621
695 4630
696 36
696 41
696 57
696 312
696 432
696 580
696 950
696 1535
696 3231
696 3994
696 4817
697 47
697 96
697 273
697 677
697 1086
697 2244
697 3319
697 4005
697 4195
697 4323
697 4954
698 5
698 54
698 411
698 641
698 1581
698 3420
698 3749
698 4189
699 7
699 111
699 169
699 2960
699 4786
700 9
700 19
700 22
700 31
700 38
700 424
700 533
700 774
700 973
700 2422
700 3291
700 3475
700 4168
700 4209
701 13
701 19
701 213
701 251
701 665
701 778
701 922
701 1034
701 1053
701 1316
701 1724
701 1952
701 2131
701 2138
701 2736
701 2850
701 3043
701 3047
701 3215
701 3534
701 4366
701 4602
701 4719
701 4746
702 8
702 40
702 62
702 354
702 356
702 2207
702 2368
702 3012
703 8
703 24
703 514
703 675
703 1156
703 1961
703 2312
703 2968
703 3193
703 4835
704 8
704 16
704 36
704 63
704 96
704 512
704 602
704 1278
704 1486
704 1541
704 1660
704 1831
704 2057
704 2310
704 3857
704 4593
704 4988
705 5
705 7
705 96
705 167
705 494
705 741
705 1234
705 1332
705 1665
705 2154
705 2214
705 2830
705 3183
705 3847
706 63
706 98
706 325
706 461
706 598
706 832
706 2330
706 2630
706 3171
706 4710
707 4
707 17
707 363
707 966
707 1018
707 1328
707 2329
707 2868
707 3177
707 3508
708 1
708 6
708 41
708 53
708 309
708 849
708 2364
708 4300
708 4923
709 9
709 39
709 88
709 94
709 104
709 115
709 210
709 733
709 756
709 801
709 853
709 970
709 1006
709 1022
709 1037
709 1091
709 1256
709 1489
709 1569
709 1680
709 1717
709 2185
709 2239
709 2287
709 3107
709 3316
709 3397
709 4075
709 4129
709 4470
709 4900
710 12
710 90
710 106
710 305
710 1064
710 2143
710 3199
710 3304
710 3332
711 3
711 14
711 19
711 27
711 47
711 212
711 695
711 1208
711 1413
711 1668
711 2298
711 2300
711 3275
711 4856
711 4883
712 0
712 6
712 27
712 42
712 57
712 387
712 432
712 1343
712 1799
712 1929
712 2151
712 2211
712 2531
712 2944
712 3977
713 19
713 50
713 402
713 2328
713 2692
713 2940
713 3784
714 103
714 810
714 3181
714 3514
715 2
715 13
715 422
715 432
715 502
715 869
715 904
715 1935
715 2954
715 3291
715 4382
716 19
716 104
716 168
716 187
716 202
716 482
716 857
716 2284
716 2381
716 2468
716 2788
716 2944
716 3710
716 4234
717 0
717 8
717 32
717 78
717 151
717 178
717 203
717 803
717 996
717 1364
717 1425
717 1673
717 1757
717 3465
717 3626
718 17
718 32
718 146
718 356
718 990
718 1248
718 1681
718 2444
718 2454
718 3496
718 4429
718 4457
718 4550
718 4565
718 4764
719 0
719 3
719 12
719 15
719 33
719 514
719 1161
719 1316
719 1605
719 1998
719 2001
719 2607
719 4926
720 2
720 15
720 16
720 108
720 114
720 125
720 144
720 276
720 792
720 1259
720 1527
720 1580
720 1682
720 2407
720 2622
720 2928
720 3745
720 3762
720 3798
720 4448
720 4636
721 21
721 59
721 119
721 347
721 387
721 428
721 567
721 616
721 676
721 783
721 858
721 907
721 1208
721 1246
721 1363
721 1595
721 2240
721 2278
721 2556
721 2609
721 2730
721 2811
721 2936
721 3059
721 3376
721 3763
721 3785
721 4084
721 4383
721 4567
721 4654
722 1
722 8
722 33
722 82
722 329
722 1358
722 1828
722 2165
722 3724
722 3880
723 7
723 62
723 287
723 324
723 372
723 1165
723 1339
723 1351
723 3203
723 3555
723 4581
723 4754
724 10
724 13
724 35
724 147
724 159
724 614
724 650
724 1110
724 1673
724 1738
724 1808
724 2008
724 2597
724 2846
724 3112
724 3135
724 3184
724 3583
724 3757
724 4046
724 4204
725 18
725 25
725 81
725 117
725 1689
725 1843
725 3848
725 4737
726 8
726 37
726 94
726 374
726 438
726 451
726 540
726 749
726 997
726 1751
726 2559
726 3233
726 3264
726 3433
726 3677
726 3871
726 4697
727 12
727 198
727 430
727 573
727 886
727 1082
727 1907
727 2477
727 2582
727 2984
727 3448
727 3509
728 14
728 44
728 51
728 75
728 165
728 533
728 660
728 693
728 1067
728 1299
728 1520
728 1834
728 2212
728 2627
728 4094
728 4224
729 1
729 27
729 43
729 225
729 322
729 541
729 549
729 1493
729 2446
729 2608
729 2843
729 3866
729 3893
729 4058
730 50
730 68
730 1668
731 0
731 43
731 57
731 166
731 207
731 542
731 851
731 1035
731 1040
731 1129
731 1647
731 1714
731 2108
731 2114
731 3050
731 3327
731 4795
732 1
732 27
732 123
732 325
732 378
732 604
732 971
732 1789
732 2326
732 2594
732 2923
732 3064
732 3550
732 3747
732 3827
733 0
733 8
733 63
733 154
733 513
733 709
733 754
733 909
733 922
733 1317
733 1319
733 2109
733 2175
733 2962
733 3505
733 3968
733 4228
733 4739
734 156
734 255
734 287
734 685
734 2047
734 2092
734 2353
734 3614
734 4895
735 119
735 259
735 428
735 540
735 554
735 1387
735 2377
735 3088
735 3195
735 3312
735 4999
736 7
736 4390
736 4404
736 4599
737 59
737 152
737 171
737 211
737 456
737 524
737 971
737 1200
737 1637
737 2406
737 2549
737 4427
737 4501
738 350
738 407
738 505
738 514
738 591
738 1169
738 1712
738 2162
738 3531
739 13
739 364
740 3
740 10
740 21
740 44
740 51
740 99
740 610
740 624
740 1094
740 1176
740 1201
740 1237
740 2192
740 2824
740 3081
740 3092
740 3729
740 3780
740 4082
741 0
741 3
741 5
741 67
741 84
741 86
741 125
741 152
741 424
741 705
741 965
741 1129
741 1153
741 1287
741 1313
741 1368
741 1799
741 1802
741 1989
741 2032
741 2511
741 2514
741 2713
741 2842
741 2879
741 2900
741 3017
741 3239
741 3284
741 3462
741 3559
741 3781
741 3825
741 3882
741 4098
741 4276
742 11
742 18
742 30
742 95
742 967
742 1052
742 1638
742 2188
742 2377
742 4322
743 18
743 28
743 93
743 459
743 1072
743 1427
743 1818
743 2018
743 2489
743 2585
743 2751
743 3589
743 4746
744 56
744 118
744 357
744 791
744 885
744 1299
744 1615
744 2765
744 4039
744 4380
745 3
745 5
745 19
745 27
745 40
745 881
745 911
745 1038
745 1092
745 1185
745 1437
745 2337
745 2550
745 3123
745 3141
745 3363
745 3436
745 3474
745 3804
745 3939
746 12
746 14
746 24
746 69
746 223
746 261
746 369
746 773
746 785
746 1364
746 1425
746 1615
746 1735
746 1931
746 2382
746 2929
746 3937
746 4118
746 4161
746 4412
746 4776
746 4832
747 26
747 30
747 117
747 237
747 408
747 533
747 2477
747 2502
747 2991
747 3834
747 4770
748 0
748 11
748 47
748 69
748 421
748 778
748 1478
748 3079
748 3150
748 3841
748 4235
748 4999
749 6
749 7
749 88
749 155
749 430
749 483
749 485
749 506
749 726
749 1280
749 1677
749 1898
749 1971
749 2059
749 2384
749 2504
749 2649
749 2783
749 2898
749 3092
749 3119
749 3151
749 3545
749 4000
749 4635
750 0
750 11
750 16
750 175
750 233
750 1226
750 2136
750 2540
750 2577
750 3331
750 4524
750 4972
751 10
751 12
751 17
751 27
751 122
751 289
751 320
751 432
751 504
751 1177
751 1419
751 1814
751 2171
751 4186
751 4224
752 8
752 174
752 232
752 293
752 351
752 2453
752 3751
753 123
753 616
753 1007
753 1687
753 4448
754 2
754 17
754 149
754 152
754 382
754 597
754 733
754 1094
754 1109
754 1233
754 1587
754 1600
754 2027
754 2281
754 2878
754 3485
754 4075
754 4576
755 5
755 7
755 25
755 44
755 140
755 418
755 573
755 1088
755 1716
755 2315
755 2421
756 45
756 62
756 308
756 314
756 541
756 597
756 709
756 1174
756 2287
756 2565
756 2864
756 2873
756 3170
756 3297
756 4273
756 4281
756 4655
757 24
757 519
757 1389
757 3870
758 0
758 12
758 40
758 119
758 257
758 418
758 1370
758 2745
758 3443
759 9
759 23
759 64
759 809
759 833
759 851
759 890
759 1555
759 1607
759 2058
759 2777
759 2893
759 3333
759 3673
759 3996
759 4245
759 4707
760 10
760 26
760 56
760 212
760 220
760 327
760 608
760 1346
760 3464
760 3817
760 4162
760 4198
760 4587
760 4647
761 21
761 59
761 104
761 174
761 226
761 323
761 431
761 569
761 618
761 1681
761 2061
761 2143
761 2486
761 2496
761 2983
761 3148
761 4028
761 4289
761 4740
762 10
762 84
762 110
762 594
762 2776
762 2899
763 2
763 8
763 35
763 53
763 108
763 336
763 592
763 1763
763 1880
763 2027
763 3142
763 4396
764 10
764 84
764 285
764 2076
764 2263
764 2376
764 2707
764 3763
764 4344
764 4424
764 4991
765 3
765 7
765 44
765 142
765 191
765 413
765 645
765 654
765 1547
765 1736
765 2314
765 2546
765 3174
765 3296
765 3362
765 3566
765 3887
765 4002
765 4209
765 4592
765 4963
766 265
766 291
766 336
766 378
766 484
766 872
766 1270
766 1291
766 1619
766 1895
766 2699
766 2942
766 3344
766 4194
767 3
767 8
767 62
767 121
767 333
767 451
767 2325
767 2759
767 3444
767 4584
768 8
768 335
768 362
768 1680
768 2454
768 3483
768 3894
768 3951
768 4703
768 4722
769 56
769 136
769 139
769 349
769 421
769 910
769 1036
769 1056
769 1124
769 1242
769 1477
769 1637
769 1669
769 1897
769 2770
769 3076
769 3289
769 3506
769 3548
769 3810
769 3922
769 4500
769 4566
770 2
770 5
770 12
770 14
770 27
770 85
770 323
770 1201
770 1297
770 1329
770 2108
770 2596
770 3153
770 3207
770 3891
770 4774
771 96
771 148
771 285
771 319
771 397
771 447
771 537
771 881
771 1102
771 1187
771 1205
771 1953
771 2272
771 2434
771 2831
771 3591
771 3729
771 4114
771 4147
771 4149
771 4189
773 12
773 29
773 95
773 265
773 287
773 514
773 591
773 746
773 1568
773 1946
773 2915
773 3111
773 3318
773 3326
773 3526
773 4970
774 21
774 45
774 56
774 532
774 700
774 875
774 2253
774 2857
774 2957
774 3534
774 4893
775 5
775 7
775 14
775 35
775 113
775 262
775 490
775 1485
775 1636
775 2394
775 2855
775 3340
775 3576
775 4601
776 3
776 10
776 342
776 481
776 611
776 802
776 1293
776 1408
776 1642
776 1666
776 2219
776 3308
776 3538
776 4331
776 4603
777 4
777 21
777 65
777 119
777 221
777 1204
777 1551
777 1608
777 1784
777 1838
777 2073
777 2832
777 3595
777 4406
778 38
778 57
778 110
778 348
778 382
778 701
778 748
778 992
778 1024
778 1279
778 1301
778 1533
778 1572
778 1754
778 1917
778 2157
778 2405
778 2601
778 2644
778 2652
778 2861
778 3228
778 3917
778 3957
778 4294
778 4596
778 4664
778 4721
779 14
779 40
779 192
779 495
779 616
779 3540
779 4460
780 8
780 144
780 251
780 855
780 1545
780 3560
780 4453
780 4510
781 0
781 5
781 10
781 43
781 70
781 149
781 324
781 589
781 664
781 951
781 1171
781 1497
781 2786
781 3102
781 4089
782 7
782 15
782 17
782 29
782 128
782 353
782 398
782 416
782 929
782 1122
782 1150
782 1713
782 1946
782 2038
782 2112
782 2161
782 2458
782 2542
782 2871
782 3156
782 3411
782 4704
783 1
783 2
783 27
783 369
783 408
783 557
783 721
783 1708
783 2348
783 2546
783 2720
783 4626
783 4977
784 35
784 38
784 63
784 220
784 342
784 420
784 577
784 820
784 1132
784 1343
784 1926
784 2065
784 2163
784 3428
784 3944
784 4968
785 5
785 10
785 15
785 560
785 562
785 640
785 746
785 997
785 1599
785 1968
785 2327
785 3412
785 3473
785 3743
785 4141
785 4853
786 35
786 52
786 69
786 391
786 504
786 865
786 1580
786 2437
786 3181
786 3385
786 3403
786 3465
786 4400
786 4588
787 12
787 94
787 96
787 1927
787 2410
787 2493
787 2901
787 3848
787 4684
788 8
788 16
788 68
788 280
788 426
788 1130
788 1215
788 1718
788 2024
788 2195
788 3583
788 3899
789 25
789 139
789 246
789 311
789 551
789 2223
789 2303
789 2528
789 2687
789 3460
789 3607
789 4037
790 37
790 45
790 50
790 334
790 395
790 457
790 1057
790 1062
790 1106
790 2585
790 2620
790 3653
790 4318
791 29
791 138
791 144
791 174
791 194
791 559
791 744
791 815
791 818
791 1163
791 1165
791 1449
791 1586
791 1744
791 1869
791 1944
791 2159
791 2181
791 2552
791 3031
791 3058
791 3083
791 3374
791 3396
791 3509
791 4005
791 4019
791 4042
791 4485
792 5
792 45
792 720
792 2151
792 2254
792 3418
793 13
793 476
793 612
793 1171
793 1182
793 1259
793 1767
793 3332
794 19
794 142
794 147
794 161
794 267
794 399
794 478
794 500
794 590
794 1449
794 1614
794 1856
794 2123
794 2678
794 3716
794 4489
794 4492
795 6
795 22
795 562
795 1085
795 1161
795 1352
795 1387
795 1716
795 1757
795 2417
795 2604
795 2708
795 3180
795 3463
796 2
796 45
796 87
796 147
796 191
796 605
796 627
796 1197
796 1265
796 1777
796 1820
796 1887
796 1971
796 2113
796 3981
796 4269
796 4282
796 4344
796 4563
796 4661
796 4675
797 8
797 56
797 97
797 118
797 364
797 430
797 558
797 602
797 1194
797 3047
797 3055
797 3421
797 3596
797 4181
798 4
798 29
798 230
798 380
798 500
798 1012
798 1250
798 1729
798 1910
798 2326
798 2526
798 2613
798 3722
798 3813
799 24
799 344
799 360
799 519
799 653
799 1434
799 1763
799 1783
799 4116
800 41
800 246
800 349
800 422
800 647
800 1339
800 2988
800 3186
800 3505
800 4231
801 5
801 6
801 203
801 265
801 709
801 906
801 923
802 5
802 7
802 496
802 776
802 1878
802 2605
803 18
803 25
803 27
803 220
803 228
803 232
803 268
803 326
803 662
803 717
803 847
803 848
803 1089
803 1187
803 1274
803 1369
803 1663
803 1768
803 1883
803 2271
803 2354
803 2444
803 3030
803 3662
803 3953
803 3962
803 4049
803 4149
803 4158
803 4243
803 4513
803 4810
803 4991
804 6
804 420
804 541
804 1775
804 1883
804 3258
804 3571
804 3686
804 4627
805 3
805 16
805 192
805 1628
805 1848
805 2144
805 2255
805 3273
805 4290
805 4419
806 25
806 76
806 84
806 218
806 274
806 380
806 934
806 1006
806 1815
806 1969
806 4918
807 1
807 11
807 15
807 16
807 87
807 1092
807 1125
807 1754
807 2936
807 3556
807 4481
807 4832
808 34
808 230
808 438
809 10
809 72
809 91
809 128
809 163
809 259
809 395
809 759
809 1862
809 3152
810 397
810 501
810 522
810 557
810 714
810 1522
810 1681
810 2221
810 2303
810 2538
810 4385
810 4487
810 4626
811 2
811 5
811 6
811 15
811 18
811 26
811 459
811 1561
811 1806
811 1879
811 1961
811 1988
811 2002
811 3367
811 3480
811 3485
811 4227
811 4681
811 4864
812 28
812 177
812 410
812 3597
812 4309
813 2
813 52
813 84
813 262
813 345
813 498
813 554
813 1935
813 2604
813 3029
813 3854
813 3967
813 4756
814 3
814 35
814 270
814 598
814 913
814 1239
814 1487
814 1581
814 2078
814 2269
814 2464
814 2467
814 2646
814 2746
814 3037
814 3224
814 3737
814 3811
814 3817
814 3941
814 4075
815 22
815 161
815 162
815 791
815 1296
815 1459
815 1766
815 2283
815 2341
815 2427
815 3090
815 3389
815 3398
815 3605
815 4289
815 4694
816 2
816 13
816 14
816 17
816 63
816 101
816 360
816 363
816 551
816 604
816 1595
816 1735
816 1884
816 2280
816 2647
816 2790
816 3132
816 3315
816 3641
816 4021
816 4325
816 4533
816 4957
817 0
817 5
817 25
817 35
817 350
817 359
817 839
817 4063
817 4202
817 4532
817 4576
817 4631
818 8
818 9
818 18
818 791
818 1179
818 1519
818 3121
818 3699
818 4010
819 1
819 3
819 72
819 161
819 202
819 395
819 1224
819 1661
819 2076
819 2270
819 3228
819 3700
819 4011
819 4492
820 12
820 41
820 154
820 345
820 360
820 784
820 1144
820 1949
820 2114
820 2420
820 3094
820 4173
821 6
821 15
821 38
821 47
821 90
821 119
821 154
821 433
821 676
821 1133
821 1478
821 1501
821 1789
821 3981
821 4778
822 14
822 75
822 547
822 560
822 3207
822 3265
822 4834
823 14
823 16
823 21
823 89
823 95
823 169
823 265
823 839
823 855
823 906
823 1218
823 1762
823 2030
823 2061
823 2233
823 2487
823 2675
823 3057
823 3457
823 3889
823 4250
823 4255
823 4590
824 18
824 23
824 32
824 91
824 118
824 525
824 1062
824 1271
824 1433
824 1555
824 1682
824 1741
824 1763
824 2093
824 2692
824 2938
824 4124
824 4223
825 23
825 29
825 364
825 545
825 1266
825 3006
825 3280
825 4214
825 4441
826 7
826 419
826 497
826 566
826 615
826 1444
826 1888
826 4152
826 4915
827 26
827 32
827 43
827 84
827 121
827 188
827 305
827 504
827 915
827 1135
827 1616
827 2245
827 2724
827 3004
827 3075
827 3586
827 4648
828 41
828 67
828 153
828 233
828 316
828 380
828 1210
828 1240
828 1514
828 1520
828 1654
828 1727
828 1829
828 1916
828 2028
828 2680
828 3110
828 3410
828 3628
828 4495
828 4518
828 4735
829 14
829 19
829 93
829 178
829 347
829 856
829 1674
829 2916
829 3111
829 3789
830 17
830 18
830 31
830 67
830 903
830 1431
830 1710
830 3661
830 3788
830 3915
831 2
831 8
831 10
831 13
831 1778
831 1893
831 2062
831 2852
831 3325
831 3397
831 4187
831 4376
831 4495
831 4572
831 4646
832 32
832 35
832 86
832 122
832 133
832 159
832 165
832 279
832 369
832 447
832 706
832 893
832 1235
832 1488
832 1979
832 2386
832 3603
832 3610
832 4673
833 0
833 5
833 18
833 104
833 142
833 363
833 759
833 894
833 1434
833 1767
833 3928
833 4058
833 4490
834 27
834 40
834 147
834 148
834 344
834 2696
834 2726
834 3016
834 4078
835 9
835 150
835 664
835 2589
835 3476
835 3905
836 6
836 62
836 222
836 426
836 466
836 481
836 608
836 931
836 3638
836 4002
836 4016
837 7
837 18
837 71
837 95
837 142
837 161
837 209
837 326
837 855
837 989
837 1056
837 1156
837 1254
837 1342
837 1530
837 1604
837 1671
837 2034
837 2292
837 2318
837 2722
837 2929
837 3284
837 3656
837 3711
837 4008
837 4137
837 4229
837 4529
837 4590
837 4700
837 4732
837 4749
838 9
838 49
838 96
838 505
838 3297
838 3343
838 3408
838 4352
838 4806
839 8
839 57
839 87
839 106
839 154
839 330
839 441
839 817
839 823
839 897
839 1754
839 3161
839 3351
839 3916
840 0
840 17
840 167
840 391
840 501
840 1211
840 1340
840 1750
840 1830
840 1874
840 1921
840 2308
840 2709
840 3158
840 3943
840 4038
840 4529
841 18
841 155
841 331
841 660
841 677
841 1723
841 1819
841 3318
841 3698
841 4471
842 12
842 144
842 312
842 341
842 406
842 432
842 855
842 1026
842 1115
842 1292
842 1478
842 1607
842 1733
842 2385
842 2709
842 2794
842 3537
842 4258
842 4781
842 4799
843 5
843 14
843 202
843 642
843 648
843 1572
843 2003
843 2304
843 2488
843 2647
843 4147
843 4226
843 4634
844 6
844 161
844 317
844 333
844 675
844 910
844 3678
844 4682
844 4898
845 6
845 163
845 257
845 342
845 467
845 618
845 948
845 1554
845 3179
845 3854
845 4176
846 0
846 71
846 179
846 213
846 280
846 1203
846 1258
846 1699
846 3037
846 3222
847 3
847 4
847 5
847 11
847 13
847 70
847 71
847 297
847 353
847 803
847 1022
847 1070
847 1090
847 1356
847 1528
847 1739
847 1926
847 2123
847 2731
847 2872
847 2901
847 3014
847 3115
847 3154
847 3260
847 3707
847 3716
847 4478
847 4499
847 4576
847 4586
847 4974
848 10
848 134
848 388
848 555
848 803
848 975
848 1420
848 1654
848 1991
848 3423
848 3904
848 3954
848 4561
849 9
849 135
849 289
849 300
849 708
849 1273
849 2194
849 3671
849 3887
850 14
850 16
850 37
850 52
850 101
850 174
850 405
850 506
850 1835
850 3591
850 3670
851 9
851 16
851 18
851 71
851 451
851 731
851 759
851 1067
851 1517
851 1923
851 2262
851 3606
852 16
852 32
852 136
852 196
852 282
852 284
852 373
852 1493
852 1635
852 1945
852 1982
852 2060
852 2101
852 2249
852 2777
852 2820
852 2959
852 3035
852 3187
852 3533
852 3757
852 4087
852 4483
852 4624
852 4700
852 4977
853 14
853 116
853 166
853 187
853 602
853 624
853 679
853 709
853 1745
853 2258
853 2586
853 3218
853 4065
853 4381
853 4523
853 4971
854 27
854 49
854 57
854 69
854 89
854 212
854 261
854 377
854 432
854 674
854 994
854 1097
854 1109
854 1187
854 1249
854 1255
854 1326
854 1562
854 1618
854 1852
854 2310
854 3066
854 3602
854 3930
854 4595
854 4598
854 4817
854 4936
854 4945
855 16
855 141
855 142
855 160
855 386
855 405
855 428
855 780
855 823
855 837
855 842
855 1329
855 2162
855 2263
855 2518
855 2532
855 2747
855 2793
855 2863
855 4637
856 2
856 12
856 111
856 345
856 473
856 829
856 1405
856 1458
856 2393
856 2471
856 4594
857 0
857 1
857 37
857 387
857 716
857 897
857 968
857 1127
857 1139
857 1231
857 1674
857 1828
857 2431
857 2487
857 4230
858 88
858 170
858 444
858 509
858 682
858 721
858 859
858 1548
858 3266
859 5
859 20
859 858
859 1926
859 4946
860 7
860 57
860 195
860 381
860 382
860 661
860 966
860 977
860 1591
860 1837
860 2147
860 2444
860 2621
860 2934
860 3565
860 3935
860 3975
860 4210
861 8
861 21
861 80
861 83
861 85
861 350
861 447
861 676
861 1035
861 1768
861 1804
861 1947
861 3107
861 3738
861 3817
862 18
862 24
862 135
862 143
862 151
862 192
862 484
862 1001
862 1024
862 1041
862 1100
862 1713
862 2683
862 2825
862 4425
863 2
863 15
863 16
863 98
863 314
863 674
863 931
863 1085
863 1343
863 2030
863 3397
863 3972
864 6
864 86
864 106
864 124
864 154
864 566
864 2483
864 4007
865 0
865 4
865 35
865 688
865 786
865 1284
865 1349
865 1470
865 1561
865 4469
866 99
866 642
867 9
867 11
867 29
867 192
867 194
867 256
867 529
867 577
867 585
867 913
867 1257
867 1409
867 1476
867 2125
867 2133
867 2261
867 2347
867 2420
867 2732
867 3238
867 3361
867 3544
868 13
868 19
868 118
868 159
868 201
868 262
868 272
868 597
868 1571
868 1903
868 2223
868 2329
868 3036
868 3056
868 3159
868 4420
868 4644
868 4655
869 5
869 436
869 715
869 2528
869 3106
869 4127
869 4235
870 12
870 119
870 269
870 292
870 612
870 883
870 1078
870 1162
870 1257
870 1614
870 2519
870 3840
870 3986
871 4
871 6
871 227
871 285
871 491
871 1058
871 1125
871 1581
871 2390
871 2431
871 2488
871 4267
872 4
872 9
872 70
872 561
872 766
872 1213
872 1407
872 1657
872 2144
872 2225
872 2562
872 2581
872 2729
872 3869
872 4740
873 91
873 2130
873 2682
873 3665
874 154
874 182
874 270
874 343
874 363
874 961
874 1002
874 2384
874 2760
874 2775
874 2816
874 2987
874 3814
874 3898
875 142
875 438
875 774
875 2494
875 3442
876 1
876 3
876 7
876 63
876 268
876 393
876 414
876 430
876 654
876 1102
876 1200
876 1455
876 1471
876 1749
876 2305
876 2418
876 2543
876 2782
876 2950
876 3228
876 3283
876 3400
876 3635
876 3805
876 4311
876 4407
876 4604
876 4611
877 1
877 8
877 333
877 395
877 407
877 428
877 656
877 1088
877 1693
877 2702
877 2998
877 4714
877 4882
878 40
878 142
878 468
878 495
878 558
878 618
878 1556
878 2381
878 2468
878 2569
878 3000
878 4046
878 4469
878 4583
878 4671
878 4737
879 0
879 10
879 14
879 18
879 525
879 2019
879 3048
879 4960
880 85
880 134
880 187
880 273
880 1493
880 1963
880 2884
880 3537
880 4492
881 4
881 19
881 207
881 219
881 508
881 535
881 745
881 771
881 1064
881 2463
881 2719
881 2932
881 3259
881 4173
881 4950
882 15
882 20
882 21
882 23
882 36
882 60
882 113
882 185
882 246
882 684
882 967
882 1036
882 1361
882 1476
882 1592
882 1710
882 2473
882 2487
882 2730
882 2768
882 3415
882 3446
882 3458
882 3691
882 4903
883 27
883 43
883 474
883 495
883 549
883 566
883 870
883 888
883 1468
883 1904
883 1945
883 2902
883 4150
884 50
884 181
884 232
884 419
884 1349
884 2152
884 3789
884 3937
885 9
885 44
885 101
885 138
885 314
885 321
885 367
885 744
885 1354
885 1730
885 2054
885 2086
885 2170
885 2566
885 2846
885 2858
885 2899
885 3293
885 3432
885 4423
885 4456
885 4469
885 4671
885 4861
885 4894
885 4923
886 1
886 14
886 84
886 119
886 515
886 727
886 1202
886 1362
886 1375
886 2199
886 2451
886 2528
886 3469
886 3929
887 247
887 349
887 378
887 397
887 421
887 610
887 2392
887 4088
888 3
888 5
888 21
888 56
888 220
888 251
888 883
888 1070
888 1391
888 1760
888 1831
888 2838
888 3514
888 3666
888 3877
888 4091
888 4751
889 2
889 32
889 37
889 149
889 313
889 362
889 395
889 476
889 902
889 920
889 1383
889 1589
889 2761
889 2853
889 2999
889 3559
889 3612
889 3888
889 4397
889 4609
890 50
890 186
890 563
890 759
890 958
890 1227
890 1404
890 1670
890 1740
890 3056
890 3202
890 4021
890 4822
891 212
891 218
891 419
891 1081
891 1816
891 3633
891 3666
892 7
892 11
892 12
892 14
892 18
892 30
892 43
892 77
892 113
892 1565
892 2032
892 3669
892 3931
892 4072
892 4330
892 4714
893 80
893 393
893 665
893 832
893 1186
893 1556
893 3777
893 3941
893 4715
894 0
894 22
894 160
894 453
894 833
894 1106
894 1861
894 3014
894 3096
894 3293
894 3787
894 4076
894 4929
895 56
895 214
895 354
895 381
895 513
895 589
895 1150
895 3105
895 4992
896 4
896 67
896 151
896 219
896 651
896 997
896 3110
896 4327
897 4
897 500
897 839
897 857
897 941
897 1972
898 66
898 67
898 91
898 171
898 399
898 634
898 957
898 1023
898 1125
898 1201
898 1304
898 1316
898 1406
898 1454
898 1509
898 1516
898 1554
898 1701
898 2153
898 2190
898 2750
898 2764
898 3124
899 0
899 3
899 342
899 1430
899 2595
899 3695
900 1
900 18
900 82
900 342
900 555
900 583
900 1762
900 2187
901 2
901 16
901 80
901 500
901 955
901 1183
901 1238
901 3064
901 3286
901 3840
901 4846
902 0
902 23
902 179
902 382
902 383
902 628
902 889
902 1046
903 3
903 4
903 5
903 18
903 117
903 360
903 830
903 1173
903 1407
903 1701
903 2185
903 2480
903 2597
903 2953
904 343
904 683
904 715
904 1380
904 1663
904 1954
904 3569
905 2
905 25
905 69
905 81
905 249
905 300
905 1195
905 1404
905 2342
905 2810
905 3186
905 4535
906 7
906 43
906 419
906 667
906 801
906 823
906 1209
906 2172
906 2213
906 2337
906 2588
906 3216
906 3439
906 4147
906 4822
907 40
907 97
907 122
907 170
907 273
907 362
907 414
907 615
907 721
907 1462
907 1557
907 1664
907 1669
907 1749
907 1819
907 1881
907 2456
907 2903
907 3467
907 3528
907 3634
907 3707
907 3726
907 3823
907 4203
907 4252
907 4289
908 1
908 14
908 32
908 245
908 286
908 315
908 539
908 2037
908 3035
908 3799
908 4178
908 4683
909 2
909 14
909 188
909 197
909 561
909 605
909 689
909 733
909 1274
909 1743
909 2736
909 2872
909 2998
909 3008
909 3237
909 3284
909 3674
909 3757
909 4736
909 4860
909 4862
910 16
910 141
910 363
910 633
910 769
910 844
910 1012
910 1691
910 2189
910 2216
910 2380
910 2558
910 2698
910 2932
911 0
911 1
911 4
911 353
911 745
911 944
911 951
911 956
911 1233
911 2374
911 2424
911 2508
911 3026
911 3085
911 3867
911 4034
911 4379
911 4439
912 14
912 16
912 51
912 86
912 133
912 1662
912 2167
912 2817
912 3524
912 4126
912 4404
913 27
913 561
913 814
913 867
913 2096
913 3828
914 88
914 335
914 354
914 488
914 524
914 691
914 1431
914 2081
914 2286
914 4272
915 428
915 432
915 827
915 984
915 1859
915 2243
915 3158
916 16
916 30
916 32
916 33
916 56
916 63
916 94
916 325
916 501
916 965
916 983
916 1063
916 1597
916 1616
916 1617
916 1653
916 2630
916 2783
916 2804
916 2885
916 3866
916 4216
916 4298
916 4316
916 4747
917 8
917 9
917 126
917 179
917 328
917 511
917 1058
917 1119
917 1679
917 4012
918 5
918 18
918 21
918 194
918 433
918 452
918 985
918 1133
918 2184
918 2204
918 2515
918 3648
918 3776
918 4981
919 214
919 607
920 81
920 258
920 404
920 889
920 1508
921 7
921 11
921 21
921 57
921 233
921 247
921 338
921 1161
921 1783
921 3164
922 2
922 8
922 14
922 32
922 48
922 273
922 701
922 733
922 955
922 2179
922 3050
922 3416
922 4219
923 265
923 540
923 801
923 1180
923 1243
923 2294
923 2583
923 2930
923 3570
923 4047
923 4390
923 4437
923 4928
923 4938
924 8
924 14
924 151
924 209
924 219
924 333
924 569
924 1072
924 2145
924 2443
924 3104
924 3475
925 50
926 187
926 564
926 2806
927 25
927 120
927 280
927 585
927 4312
927 4409
928 11
928 36
928 194
928 230
928 245
928 533
928 683
928 954
928 996
928 1120
928 1239
928 1289
928 1533
928 1679
928 1917
928 2144
928 2192
928 2525
928 2867
928 3037
928 3549
928 3821
928 4367
928 4451
928 4658
928 4953
929 5
929 19
929 56
929 157
929 165
929 599
929 782
929 3823
929 4245
930 322
930 387
930 566
930 569
930 944
930 960
930 1977
930 2431
930 3457
930 3508
930 3509
930 3906
930 4026
930 4426
930 4857
930 4977
931 7
931 45
931 158
931 207
931 284
931 423
931 836
931 863
931 1591
931 1751
931 1783
931 2661
931 2733
931 3559
931 3675
931 3695
931 3932
931 4141
931 4502
931 4680
932 3
932 120
932 530
932 1533
932 1831
932 2080
933 75
933 155
933 207
933 318
933 493
933 935
933 1013
933 1073
933 1525
933 2126
933 2800
933 3821
933 3974
933 4162
933 4343
934 18
934 48
934 285
934 327
934 482
934 613
934 806
934 990
934 1132
934 1203
934 1212
934 1219
934 1464
934 2314
934 2420
934 2672
934 2822
934 2876
934 3143
934 3582
934 3778
934 4202
934 4361
935 7
935 18
935 224
935 583
935 933
935 2898
935 3566
935 4972
936 85
936 124
936 369
936 422
936 1099
936 1657
936 1741
936 2087
936 2964
937 8
937 11
937 467
937 998
937 2497
937 3961
938 110
938 198
938 208
938 234
938 249
938 515
938 688
938 2357
938 3571
938 4936
939 11
939 326
939 350
939 1026
939 2092
939 3043
939 3096
939 3777
940 13
940 19
940 157
940 289
940 564
940 2005
940 2809
940 2974
940 3157
940 3191
940 3566
940 3667
941 7
941 270
941 300
941 897
941 1379
941 1789
942 7
942 174
942 221
942 616
942 648
942 1378
942 1894
942 1985
942 2849
942 3071
942 3191
942 4062
943 2
943 7
943 18
943 129
943 675
943 1263
943 1880
943 2321
943 3029
943 4624
944 2
944 16
944 64
944 220
944 313
944 360
944 567
944 911
944 930
944 1082
944 1087
944 1120
944 2003
944 2919
944 3292
944 3294
944 4411
944 4785
944 4876
945 14
945 17
945 411
945 522
945 674
945 1137
945 1865
945 2026
945 2583
945 3718
946 8
946 113
946 476
946 3520
946 4077
947 20
947 24
947 154
947 537
947 621
947 1245
947 1697
947 1878
947 2371
947 3051
947 4561
948 59
948 165
948 431
948 662
948 845
948 1002
948 1044
948 1092
948 1135
948 1995
948 2953
948 3274
948 3466
948 3733
948 3905
948 4149
948 4556
948 4985
949 1
949 10
949 124
949 282
949 487
949 569
949 603
949 1128
949 1157
949 1361
949 1430
949 2394
949 2415
949 2540
949 2870
949 3045
949 3518
949 3744
949 4393
949 4460
949 4488
949 4568
949 4779
950 9
950 165
950 194
950 465
950 633
950 696
950 1607
951 1
951 14
951 213
951 416
951 449
951 781
951 911
951 1122
951 1531
951 1680
951 1758
951 1921
951 2075
951 2338
951 2494
951 3018
951 3135
951 4565
952 7
952 10
952 13
952 57
952 66
952 179
952 253
952 416
952 563
952 1098
952 1296
952 1498
952 1541
952 2178
952 2311
952 2341
952 2628
952 2742
952 2745
952 2930
952 3435
952 4305
952 4684
952 4854
953 7
953 18
953 68
953 144
953 197
953 250
953 484
953 1604
953 2279
953 3065
953 3509
954 11
954 14
954 202
954 928
954 1511
954 1708
954 1953
954 2489
954 3506
954 3837
954 4456
955 47
955 231
955 500
955 630
955 901
955 922
955 1376
955 1516
955 1600
955 2801
955 3230
955 3250
955 3491
955 3622
955 3719
955 3737
955 3997
955 4176
955 4757
955 4818
956 5
956 13
956 17
956 56
956 100
956 133
956 159
956 911
956 1248
956 1779
956 2205
956 2910
956 3127
956 3223
956 3432
956 3668
956 4037
956 4071
957 557
957 898
957 3030
958 16
958 196
958 337
958 890
958 1715
958 3945
959 5
959 1196
959 1298
959 1409
959 1882
959 3666
959 4049
959 4301
959 4303
960 15
960 57
960 66
960 382
960 930
960 1037
960 1515
960 1626
960 1675
960 1924
960 2863
960 2988
960 3522
960 3852
961 574
961 874
962 0
962 6
962 41
962 347
962 397
962 423
962 1183
962 2112
962 2664
962 2821
963 622
964 8
964 56
964 244
964 265
964 300
964 420
964 664
964 2188
964 2705
964 3792
964 4452
965 171
965 741
965 916
965 3400
965 3665
966 10
966 17
966 707
966 860
966 3297
966 4711
967 26
967 50
967 742
967 882
967 1758
967 1765
968 5
968 19
968 40
968 298
968 410
968 606
968 857
968 1340
968 1452
968 1632
968 1780
968 1796
968 1880
968 1981
968 2810
968 2873
968 3005
968 3379
968 3582
968 3672
968 3899
968 4740
969 3
969 9
969 135
969 184
969 263
969 445
969 538
969 1830
969 2162
969 3221
969 3412
969 4181
969 4753
970 4
970 59
970 524
970 541
970 709
970 2849
970 3395
970 3669
971 8
971 10
971 192
971 338
971 380
971 732
971 737
971 1629
971 1782
971 1964
971 2320
971 2499
971 2732
971 3210
971 3377
971 3890
971 4576
971 4694
972 3
972 14
972 19
972 382
972 561
972 1448
972 1732
972 2689
972 3142
972 4040
973 4
973 9
973 475
973 614
973 700
973 1104
973 2546
973 2659
973 3417
973 4774
974 245
974 1607
974 1757
974 3930
974 4262
975 193
975 374
975 451
975 518
975 572
975 623
975 848
975 983
975 1042
975 1176
975 1495
975 2500
975 3616
975 4305
975 4384
976 3
976 9
976 71
976 121
976 122
976 607
976 1128
976 1360
976 1370
976 1423
976 1584
976 2079
976 3100
976 3103
976 3226
976 4024
976 4191
976 4237
976 4588
977 325
977 416
977 561
977 860
977 4318
977 4579
978 2
978 16
978 185
978 348
978 1381
978 2042
978 2116
978 2440
978 2738
979 4
979 17
979 44
979 48
979 124
979 142
979 423
979 641
979 1002
979 1055
979 1951
979 2332
979 3176
979 3182
979 3458
979 4878
980 25
980 27
980 134
980 445
980 1219
980 1272
980 1288
980 1467
980 1523
980 1911
980 2090
980 2368
980 2572
980 4398
980 4939
981 9
981 10
981 18
981 25
981 60
981 66
981 84
981 1016
981 1317
981 1362
981 1883
981 2192
981 2239
981 2336
981 2341
981 3163
981 3317
981 3921
981 4005
982 3
982 5
982 8
982 62
982 147
982 185
982 255
982 1161
982 1221
982 1241
982 1340
982 1866
982 2144
982 2323
982 2771
982 3599
982 3878
982 4461
982 4498
982 4767
983 18
983 47
983 525
983 624
983 916
983 975
983 1203
983 3142
983 3343
984 0
984 5
984 19
984 83
984 128
984 171
984 184
984 674
984 679
984 915
984 1118
984 1208
984 1215
984 1220
984 1237
984 1365
984 1614
984 1726
984 1823
984 2502
984 2759
984 2864
984 3412
984 3709
984 4130
984 4250
984 4725
985 84
985 265
985 298
985 300
985 420
985 556
985 918
985 1567
985 1843
985 1973
985 2241
985 2329
985 2922
985 3007
985 3018
985 3347
985 4309
985 4469
986 5
986 179
986 287
986 533
986 1580
986 2507
986 2553
986 2965
986 4379
986 4935
987 4
987 10
987 83
987 237
987 308
987 419
987 1263
987 1557
987 2509
987 3523
988 7
988 17
988 24
988 405
988 537
988 1043
988 1145
988 1772
988 2000
988 2594
988 2882
988 4678
989 0
989 14
989 78
989 129
989 395
989 442
989 837
989 1585
989 2510
989 3041
989 3098
989 3169
989 3299
989 3370
989 4342
990 141
990 181
990 718
990 934
990 4896
991 187
991 474
991 475
991 492
991 1143
991 1668
991 2010
991 2174
991 2316
991 3552
991 3646
991 3966
992 3
992 52
992 778
992 2531
992 2805
993 5
993 245
993 333
993 4132
993 4732
994 2
994 4
994 16
994 17
994 32
994 854
994 1365
994 1416
994 1456
994 1854
994 2647
994 3523
995 37
995 52
995 60
995 161
995 210
995 566
995 1000
995 1229
995 1318
995 2631
995 2649
995 2981
995 3280
995 3465
995 3685
995 4513
995 4910
996 12
996 69
996 124
996 155
996 456
996 596
996 717
996 928
996 1553
996 2293
996 2493
996 2759
996 3047
996 3651
996 4103
996 4118
996 4322
996 4576
997 11
997 19
997 73
997 105
997 220
997 726
997 785
997 896
997 1013
997 1261
997 1778
997 1831
997 2085
997 2089
997 2109
997 2648
997 3810
997 4468
997 4821
997 4897
998 2
998 28
998 32
998 937
998 1352
998 1708
998 1978
998 2103
998 2834
998 4736
999 18
999 46
999 124
999 482
999 1039
999 3581
1000 57
1000 177
1000 194
1000 995
1000 1276
1000 1516
1000 1925
1000 3446
1000 4076
1000 4128
1000 4548
1001 8
1001 438
1001 581
1001 862
1001 1434
1001 1609
1001 2171
1001 4524
1002 3
1002 20
1002 874
1002 948
1002 979
1002 3175
1002 3611
1003 4
1003 8
1003 25
1003 525
1003 542
1003 1898
1003 3825
1004 40
1004 302
1004 505
1004 1304
1004 1893
1004 2464
1004 3799
1004 4259
1005 4
1005 20
1005 185
1005 1067
1005 1121
1005 1517
1005 2944
1005 4322
1006 10
1006 11
1006 13
1006 467
1006 709
1006 806
1006 1322
1006 1407
1006 1701
1006 1740
1006 1927
1006 3371
1006 3919
1007 147
1007 179
1007 270
1007 441
1007 596
1007 753
1007 1626
1007 2216
1007 2503
1007 2551
1007 2780
1007 3923
1008 0
1008 3
1008 21
1008 2292
1008 3151
1009 7
1009 11
1009 16
1009 25
1009 88
1009 95
1009 154
1009 2135
1009 2609
1009 2704
1009 3705
1009 4201
1009 4779
1010 2
1010 18
1010 192
1011 25
1011 300
1011 357
1011 387
1011 405
1011 512
1011 624
1011 628
1011 1272
1011 1546
1011 1625
1011 2250
1011 2371
1011 2545
1011 2857
1011 3124
1011 3200
1011 3274
1011 3483
1011 3567
1011 3570
1011 4950
1012 3
1012 12
1012 192
1012 197
1012 798
1012 910
1012 1122
1012 1518
1012 2225
1012 3522
1013 5
1013 14
1013 25
1013 248
1013 372
1013 679
1013 933
1013 997
1013 1301
1013 1492
1013 1581
1013 2076
1013 2493
1013 2769
1013 2877
1013 3087
1013 3254
1013 3267
1013 3528
1013 3592
1013 3965
1013 4002
1013 4145
1013 4247
1013 4274
1013 4573
1014 56
1014 162
1014 245
1014 515
1014 582
1014 603
1014 1057
1014 1327
1014 1392
1014 1596
1014 1752
1014 1951
1014 2140
1014 2289
1014 2425
1014 2765
1014 2962
1014 3143
1014 3248
1014 3283
1014 3544
1014 3565
1014 4003
1014 4426
1015 6
1015 7
1015 17
1015 25
1015 67
1015 140
1015 1546
1015 3071
1015 4893
1016 170
1016 309
1016 372
1016 981
1016 1597
1016 1769
1017 2
1017 63
1017 319
1017 444
1017 669
1017 3731
1017 4376
1017 4578
1018 15
1018 22
1018 70
1018 85
1018 442
1018 570
1018 614
1018 707
1018 1083
1018 1109
1018 1684
1018 2475
1018 2496
1018 3068
1018 3929
1018 4477
1018 4943
1019 26
1019 99
1019 150
1019 301
1019 387
1019 486
1019 616
1019 1863
1019 2431
1019 4046
1019 4586
1019 4843
1020 4
1020 17
1020 96
1020 609
1020 1972
1020 3447
1020 3790
1020 4550
1021 2
1021 5
1021 12
1021 141
1021 180
1021 322
1021 1323
1022 71
1022 104
1022 280
1022 300
1022 500
1022 683
1022 709
1022 847
1022 1417
1022 1516
1022 1537
1022 2525
1022 4077
1022 4812
1023 6
1023 143
1023 227
1023 283
1023 898
1023 1874
1023 2060
1023 2335
1023 4211
1023 4720
1024 5
1024 12
1024 25
1024 88
1024 159
1024 778
1024 862
1024 1067
1024 1504
1024 1558
1024 1681
1024 2739
1024 3646
1024 3946
1024 4419
1024 4887
1024 4998
1025 5
1025 12
1025 25
1025 226
1025 424
1025 1117
1025 1448
1025 3320
1025 3679
1025 4252
1026 10
1026 21
1026 107
1026 306
1026 342
1026 485
1026 842
1026 939
1026 1242
1026 1738
1026 2211
1026 2778
1026 3266
1026 4622
1026 4673
1027 44
1027 614
1027 1166
1027 1195
1027 1298
1027 1639
1027 3269
1027 4027
1027 4266
1028 0
1028 464
1029 114
1029 162
1029 248
1029 570
1029 1032
1029 1243
1029 1831
1029 1890
1029 4952
1030 27
1030 111
1030 179
1030 218
1030 1147
1030 1780
1030 2016
1030 2203
1030 2523
1031 1
1031 2
1031 28
1031 161
1031 177
1031 189
1031 563
1031 3241
1031 3541
1032 300
1032 312
1032 1029
1032 1035
1032 4636
1033 2
1033 8
1033 12
1033 17
1033 258
1033 495
1033 1155
1033 1165
1033 1266
1033 1508
1033 1560
1033 1633
1033 1643
1033 1676
1033 1693
1033 2381
1033 3245
1033 3499
1033 4684
1033 4792
1033 4794
1034 1
1034 20
1034 99
1034 129
1034 282
1034 339
1034 701
1034 1056
1034 1269
1034 2576
1034 3039
1034 3193
1034 4238
1035 17
1035 91
1035 116
1035 419
1035 731
1035 861
1035 1032
1035 1962
1035 2764
1035 4054
1035 4563
1035 4931
1036 30
1036 95
1036 229
1036 345
1036 597
1036 602
1036 769
1036 882
1036 2048
1036 2934
1036 3553
1036 4112
1037 4
1037 12
1037 84
1037 85
1037 87
1037 100
1037 632
1037 709
1037 960
1037 1584
1037 4904
1038 21
1038 89
1038 470
1038 497
1038 502
1038 672
1038 745
1038 2040
1038 4389
1038 4842
1039 17
1039 24
1039 29
1039 120
1039 171
1039 191
1039 441
1039 999
1039 1085
1039 1385
1039 1531
1039 1935
1039 1984
1039 2377
1039 2480
1039 3678
1039 3901
1039 4038
1039 4494
1039 4858
1040 7
1040 16
1040 21
1040 62
1040 85
1040 382
1040 388
1040 731
1040 1129
1040 1178
1040 1261
1040 1348
1040 1480
1040 1609
1040 1700
1040 1977
1040 2657
1040 2694
1040 2985
1040 3273
1040 3692
1040 3709
1040 3846
1040 4078
1040 4222
1040 4546
1040 4687
1041 16
1041 62
1041 78
1041 292
1041 409
1041 862
1042 2
1042 7
1042 51
1042 60
1042 103
1042 104
1042 975
1042 1124
1042 1307
1042 1676
1042 2112
1042 2234
1042 2534
1042 2582
1042 2815
1042 2957
1042 3291
1042 3390
1042 3646
1042 3684
1042 4340
1042 4378
1043 42
1043 151
1043 500
1043 988
1043 1057
1043 1520
1043 2250
1043 3294
1043 3371
1043 3560
1043 3610
1043 4131
1044 8
1044 28
1044 209
1044 218
1044 242
1044 319
1044 948
1044 1124
1044 1541
1044 1836
1044 1971
1044 2014
1044 2106
1044 2551
1044 3336
1044 4263
1045 1
1045 3
1045 13
1045 73
1045 86
1045 225
1045 655
1045 1359
1045 1474
1045 1478
1045 1683
1045 1823
1045 2836
1045 3774
1046 9
1046 45
1046 347
1046 653
1046 902
1046 4708
1046 4919
1047 56
1047 123
1047 436
1047 468
1047 1376
1047 2083
1047 3163
1047 3286
1047 3597
1047 4951
1048 81
1048 282
1048 506
1048 519
1048 1466
1048 2161
1048 3438
1049 6
1049 8
1049 16
1049 25
1049 411
1049 414
1049 607
1049 669
1049 1978
1049 2447
1049 2539
1049 3448
1049 3451
1049 3673
1049 3721
1049 3892
1049 4151
1049 4196
1049 4375
1050 11
1050 14
1050 454
1050 3282
1051 128
1051 213
1051 233
1051 464
1051 511
1051 2607
1051 4177
1052 3
1052 12
1052 13
1052 15
1052 17
1052 26
1052 301
1052 638
1052 742
1052 1497
1052 1843
1052 2030
1052 2290
1052 2292
1052 2448
1052 2748
1052 2884
1052 3356
1052 4692
1053 19
1053 29
1053 424
1053 495
1053 701
1053 1210
1053 1400
1053 4796
1054 8
1054 18
1054 75
1054 91
1054 215
1054 271
1054 1117
1054 1126
1054 2023
1054 2452
1054 2474
1054 2725
1054 2754
1054 3454
1054 3659
1054 3750
1055 14
1055 55
1055 100
1055 216
1055 399
1055 979
1055 1096
1055 1192
1055 1256
1055 2199
1055 3808
1055 4752
1056 12
1056 70
1056 440
1056 475
1056 769
1056 837
1056 1034
1056 1100
1056 1142
1056 2013
1056 2222
1056 3048
1056 3502
1056 4443
1056 4674
1056 4914
1057 18
1057 88
1057 344
1057 405
1057 643
1057 790
1057 1014
1057 1043
1057 1644
1057 1774
1057 2257
1057 3135
1057 3599
1057 3729
1057 3864
1057 3985
1057 4095
1057 4594
1057 4881
1057 4932
1058 51
1058 321
1058 599
1058 871
1058 917
1058 3518
1059 10
1059 12
1059 18
1059 85
1059 418
1059 2247
1059 2450
1059 3245
1059 3889
1060 29
1060 237
1060 314
1060 347
1060 1066
1060 1399
1060 1441
1060 2038
1060 3549
1060 4593
1060 4818
1061 3
1061 13
1061 194
1061 335
1061 558
1061 587
1061 1138
1061 1234
1061 1861
1061 1979
1061 2406
1062 0
1062 11
1062 16
1062 116
1062 124
1062 212
1062 246
1062 790
1062 824
1062 1161
1062 1258
1062 1677
1062 1875
1062 1986
1062 2595
1062 2840
1062 3397
1062 3517
1062 3712
1062 4030
1063 3
1063 8
1063 9
1063 29
1063 40
1063 114
1063 224
1063 264
1063 392
1063 916
1063 1280
1063 1571
1063 1783
1063 1888
1063 2216
1063 2707
1063 3039
1063 3284
1063 3572
1063 3614
1063 3892
1063 4438
1063 4494
1064 7
1064 194
1064 628
1064 710
1064 881
1064 2120
1065 7
1065 11
1065 17
1065 27
1065 142
1065 432
1065 536
1065 648
1065 1740
1065 1843
1065 2545
1065 3025
1065 3738
1065 4003
1066 4
1066 7
1066 114
1066 306
1066 1060
1066 2619
1067 12
1067 15
1067 26
1067 50
1067 164
1067 633
1067 728
1067 851
1067 1005
1067 1024
1067 1122
1067 3024
1067 3245
1067 3275
1067 3719
1067 4112
1068 5
1068 16
1068 238
1068 299
1068 1923
1068 3419
1068 3595
1069 0
1069 10
1069 23
1069 31
1069 77
1069 104
1069 221
1069 639
1069 1573
1069 2466
1069 2979
1069 3100
1069 3886
1069 4701
1069 4720
1070 70
1070 77
1070 182
1070 211
1070 847
1070 888
1070 1656
1070 1855
1070 2284
1070 2793
1070 4399
1070 4402
1070 4488
1071 12
1071 66
1071 75
1071 95
1071 596
1071 4896
1072 20
1072 370
1072 743
1072 924
1072 1207
1072 1329
1072 1903
1072 2122
1072 2536
1072 2899
1072 3538
1072 4284
1072 4778
1073 53
1073 274
1073 326
1073 533
1073 933
1073 1283
1073 1734
1073 2045
1073 2311
1073 2861
1073 3154
1073 3419
1073 3556
1073 4077
1073 4217
1073 4364
1073 4849
1074 0
1074 53
1074 547
1074 2522
1074 3554
1075 13
1075 15
1075 22
1075 100
1075 192
1075 282
1075 335
1075 614
1075 695
1075 1076
1075 1440
1075 1477
1075 1718
1075 1840
1075 2591
1075 2975
1075 3910
1075 4188
1075 4241
1075 4990
1076 6
1076 9
1076 123
1076 427
1076 1075
1076 1747
1076 3438
1076 4608
1077 0
1077 9
1077 21
1077 171
1077 1951
1077 2218
1077 2455
1077 2811
1077 4558
1077 4574
1077 4586
1077 4807
1078 14
1078 319
1078 870
1078 1124
1078 2039
1079 1
1079 8
1079 2279
1080 24
1080 71
1080 106
1080 293
1080 676
1080 1220
1080 1476
1080 1550
1080 3592
1080 4085
1081 0
1081 130
1081 179
1081 233
1081 551
1081 664
1081 891
1081 1853
1081 2217
1081 2890
1081 3418
1081 3516
1081 3996
1081 4377
1081 4692
1082 7
1082 156
1082 157
1082 327
1082 446
1082 727
1082 944
1082 1143
1082 1166
1082 1400
1082 1458
1082 2526
1082 2547
1082 2629
1082 3824
1082 4146
1082 4170
1082 4258
1082 4430
1082 4551
1082 4782
1083 6
1083 14
1083 45
1083 58
1083 80
1083 100
1083 324
1083 505
1083 1018
1083 1693
1083 2584
1083 2600
1083 2815
1083 4226
1083 4401
1083 4553
1084 57
1084 69
1084 81
1084 187
1084 321
1084 369
1084 657
1084 1167
1084 1829
1084 4037
1084 4112
1084 4333
1085 8
1085 12
1085 35
1085 98
1085 202
1085 371
1085 409
1085 674
1085 795
1085 863
1085 1039
1085 1563
1085 1584
1085 2105
1085 2155
1085 2299
1085 2423
1085 2734
1085 2946
1085 3831
1085 3910
1085 4051
1085 4180
1085 4770
1085 4960
1085 4979
1086 8
1086 28
1086 66
1086 199
1086 206
1086 566
1086 697
1086 1475
1086 2226
1086 4643
1087 4
1087 8
1087 285
1087 349
1087 443
1087 511
1087 944
1087 1174
1087 1502
1087 1732
1087 2261
1087 2457
1087 2981
1087 3156
1087 4148
1087 4157
1087 4798
1088 4
1088 11
1088 16
1088 88
1088 434
1088 578
1088 605
1088 755
1088 877
1088 1513
1088 1558
1088 1708
1088 2997
1088 4095
1089 61
1089 63
1089 152
1089 611
1089 803
1089 1198
1089 1211
1089 1528
1089 1579
1089 1624
1089 1801
1089 2234
1089 4239
1089 4368
1089 4408
1089 4699
1090 120
1090 274
1090 357
1090 446
1090 847
1090 1391
1090 3325
1090 3380
1090 3834
1090 4010
1091 10
1091 14
1091 154
1091 476
1091 709
1091 1690
1091 2189
1091 2340
1091 2350
1091 2529
1091 4247
1092 8
1092 227
1092 579
1092 745
1092 807
1092 948
1092 1266
1092 3127
1092 3923
1092 4406
1093 0
1093 4
1093 66
1093 85
1093 224
1093 457
1093 498
1093 3778
1093 3985
1094 15
1094 48
1094 94
1094 106
1094 485
1094 740
1094 754
1094 2422
1094 2425
1094 3967
1094 4170
1094 4949
1095 5
1095 31
1095 54
1095 294
1095 1420
1095 1756
1095 3248
1095 3313
1096 1
1096 12
1096 67
1096 76
1096 149
1096 1055
1096 1795
1096 2535
1096 2968
1096 4324
1097 16
1097 207
1097 465
1097 854
1097 1305
1097 1797
1097 2328
1098 10
1098 146
1098 249
1098 286
1098 504
1098 608
1098 677
1098 952
1098 3718
1098 3895
1098 3956
1098 4222
1099 8
1099 16
1099 58
1099 631
1099 936
1099 1559
1099 2383
1099 3261
1100 0
1100 31
1100 78
1100 566
1100 862
1100 1056
1100 2908
1100 3730
1100 4181
1100 4230
1100 4375
1100 4733
1101 19
1101 153
1101 196
1101 605
1101 617
1101 1181
1101 1671
1101 1893
1101 2795
1101 2850
1101 2891
1101 3027
1101 3510
1102 4
1102 7
1102 62
1102 210
1102 302
1102 424
1102 465
1102 771
1102 876
1102 1268
1102 1322
1102 2401
1102 2726
1102 2987
1102 3162
1102 3179
1103 3
1103 8
1103 134
1103 336
1103 1187
1103 2753
1103 4988
1104 0
1104 22
1104 422
1104 973
1104 2113
1104 4754
1104 4775
1105 19
1105 468
1105 517
1106 32
1106 88
1106 364
1106 413
1106 567
1106 790
1106 894
1106 1235
1106 1298
1106 1445
1106 1501
1106 2168
1106 3098
1106 4433
1106 4963
1107 0
1107 116
1107 248
1107 250
1107 1462
1107 1608
1107 2010
1107 2137
1107 2246
1107 2757
1107 2873
1107 3112
1107 3245
1107 3433
1107 3548
1107 4298
1108 37
1108 65
1108 154
1108 4037
1108 4223
1109 11
1109 171
1109 381
1109 484
1109 754
1109 854
1109 1018
1109 4079
1109 4518
1109 4576
1110 9
1110 724
1110 1773
1110 3203
1111 69
1111 127
1111 199
1112 4
1112 10
1112 27
1112 383
1112 497
1112 535
1112 1697
1112 2157
1112 2823
1112 3188
1112 3514
1112 4570
1112 4668
1113 0
1113 14
1113 17
1113 184
1113 4939
1114 5
1114 64
1114 261
1114 658
1114 2847
1114 3104
1114 3654
1114 3754
1114 4495
1115 27
1115 75
1115 116
1115 354
1115 410
1115 493
1115 842
1115 1708
1115 2741
1115 3234
1115 3659
1115 3681
1115 4967
1116 4
1116 5
1116 16
1116 171
1116 617
1116 624
1116 2426
1116 2805
1116 4237
1116 4867
1117 47
1117 248
1117 457
1117 632
1117 1025
1117 1054
1117 4388
1118 19
1118 22
1118 24
1118 405
1118 436
1118 984
1118 1196
1118 2230
1118 3243
1118 3575
1118 3821
1118 4518
1119 19
1119 22
1119 268
1119 333
1119 464
1119 547
1119 917
1119 1221
1119 1554
1119 2187
1119 2370
1119 2475
1119 2495
1119 2578
1119 3087
1119 3517
1120 0
1120 114
1120 119
1120 325
1120 404
1120 928
1120 944
1120 1230
1120 1277
1120 1724
1120 2041
1120 2363
1120 2404
1120 2873
1120 3622
1120 4536
1120 4541
1120 4599
1121 11
1121 17
1121 131
1121 142
1121 273
1121 298
1121 402
1121 478
1121 1005
1121 1146
1121 2315
1121 2662
1121 3312
1121 3644
1121 3804
1121 4633
1121 4695
1121 4710
1122 10
1122 27
1122 70
1122 270
1122 782
1122 951
1122 1012
1122 1067
1122 1653
1122 1688
1122 1871
1122 2138
1122 3637
1122 3879
1122 4329
1122 4774
1123 2
1123 10
1123 36
1123 48
1123 116
1123 176
1123 234
1123 381
1123 505
1123 602
1123 1264
1123 2171
1123 2397
1123 2414
1123 3409
1123 3503
1124 5
1124 279
1124 309
1124 441
1124 520
1124 769
1124 1042
1124 1044
1124 1078
1124 1623
1124 2103
1124 2558
1124 2936
1124 3070
1125 3
1125 14
1125 807
1125 871
1125 898
1125 1164
1125 1220
1125 1401
1125 1413
1125 2058
1125 4371
1126 3
1126 16
1126 52
1126 197
1126 337
1126 554
1126 1054
1126 1292
1126 1715
1126 2432
1126 4445
1127 35
1127 38
1127 69
1127 75
1127 225
1127 307
1127 456
1127 479
1127 857
1127 1249
1127 1729
1127 2228
1127 2470
1127 2487
1127 2998
1127 3135
1127 3546
1127 3856
1127 4080
1127 4905
1128 949
1128 976
1128 1681
1128 2949
1129 7
1129 14
1129 263
1129 378
1129 660
1129 731
1129 741
1129 1040
1129 1233
1129 1763
1129 1837
1129 1995
1129 2670
1129 2973
1129 3095
1129 3975
1129 4157
1130 12
1130 282
1130 308
1130 788
1130 2343
1130 3540
1130 3602
1130 4094
1130 4826
1130 4872
1131 0
1131 3
1131 4
1131 52
1131 268
1131 285
1131 689
1131 1133
1131 1230
1131 1897
1131 1919
1131 2358
1131 2433
1131 2673
1131 2969
1131 3319
1131 3552
1131 3640
1131 3998
1131 4526
1131 4631
1132 14
1132 15
1132 35
1132 95
1132 383
1132 784
1132 934
1132 1396
1132 2380
1132 2639
1132 3549
1132 4167
1132 4462
1133 25
1133 229
1133 821
1133 918
1133 1131
1133 1445
1133 2731
1133 3337
1133 4524
1133 4665
1133 4945
1134 8
1134 10
1134 362
1134 622
1134 1275
1134 2295
1134 2869
1134 3439
1135 8
1135 13
1135 21
1135 26
1135 540
1135 632
1135 827
1135 948
1135 1496
1135 1858
1135 2899
1135 2916
1135 3380
1135 3549
1135 3775
1135 4530
1136 43
1136 151
1136 349
1136 618
1136 3890
1137 1
1137 85
1137 945
1137 1482
1137 2291
1138 2
1138 89
1138 245
1138 628
1138 1061
1138 1305
1138 1679
1138 3202
1138 4125
1139 282
1139 433
1139 537
1139 857
1139 1770
1140 9
1140 19
1140 54
1140 444
1140 616
1140 1218
1140 1227
1140 1883
1140 2074
1140 2110
1140 2115
1140 2220
1140 2396
1140 2694
1140 2987
1140 3982
1140 4303
1140 4702
1140 4934
1141 10
1141 14
1141 70
1141 187
1141 451
1141 611
1141 3590
1141 4051
1141 4145
1141 4811
1142 5
1142 27
1142 655
1142 1056
1142 1251
1142 1338
1142 2724
1142 4940
1143 3
1143 4
1143 14
1143 991
1143 1082
1144 7
1144 16
1144 29
1144 226
1144 243
1144 325
1144 402
1144 820
1144 1497
1144 1662
1144 1916
1144 3136
1145 17
1145 134
1145 988
1145 1829
1146 13
1146 126
1146 187
1146 293
1146 596
1146 610
1146 1121
1146 1234
1146 1338
1146 1418
1146 1538
1146 3732
1146 4072
1146 4877
1147 50
1147 212
1147 421
1147 451
1147 497
1147 1030
1147 1193
1147 1244
1148 7
1148 12
1148 14
1148 57
1148 97
1148 116
1148 265
1148 415
1148 1433
1148 1523
1148 1746
1148 2077
1148 3492
1149 47
1149 158
1149 192
1149 342
1149 3874
1149 4750
1150 2
1150 8
1150 66
1150 116
1150 262
1150 322
1150 672
1150 782
1150 895
1150 2014
1150 2548
1150 3070
1150 4155
1150 4902
1151 16
1151 25
1151 33
1151 107
1151 2019
1151 3556
1151 4419
1152 49
1152 273
1152 1869
1152 2163
1152 4725
1153 3
1153 25
1153 233
1153 741
1154 9
1154 144
1154 246
1154 398
1154 679
1155 2
1155 13
1155 124
1155 186
1155 1033
1156 6
1156 51
1156 289
1156 413
1156 589
1156 614
1156 703
1156 837
1156 1299
1156 2624
1156 3975
1156 4273
1157 1
1157 427
1157 949
1157 3840
1157 3942
1158 15
1158 35
1158 70
1158 88
1158 94
1158 196
1158 387
1158 685
1158 1440
1159 59
1159 79
1159 229
1159 541
1159 1771
1159 3743
1160 8
1160 48
1160 664
1160 2766
1160 3532
1160 4881
1161 10
1161 15
1161 40
1161 212
1161 371
1161 719
1161 795
1161 921
1161 982
1161 1062
1161 1264
1161 1497
1161 2138
1161 2276
1161 2486
1161 2547
1161 3925
1161 4466
1162 157
1162 187
1162 870
1162 1212
1162 2755
1162 2766
1162 3184
1162 3381
1162 3679
1162 4482
1163 2
1163 106
1163 154
1163 398
1163 791
1163 1700
1163 3523
1163 4996
1164 5
1164 19
1164 249
1164 404
1164 409
1164 579
1164 1125
1164 1333
1164 2516
1164 3136
1164 3672
1164 3761
1164 4351
1164 4643
1165 3
1165 161
1165 431
1165 723
1165 791
1165 1033
1165 2328
1165 2833
1165 4709
1166 38
1166 60
1166 276
1166 1027
1166 1082
1166 1410
1167 3
1167 96
1167 556
1167 1084
1168 23
1168 579
1168 1196
1168 3053
1168 4300
1168 4888
1169 19
1169 45
1169 104
1169 179
1169 282
1169 424
1169 586
1169 738
1169 1333
1169 1758
1169 2128
1169 2599
1169 2755
1169 2937
1170 1
1170 4
1170 10
1170 84
1170 91
1170 155
1170 176
1170 284
1170 1478
1170 2051
1170 2335
1170 2521
1170 3191
1170 3303
1170 3491
1170 3641
1170 3737
1170 3783
1170 3883
1170 4081
1170 4401
1171 18
1171 110
1171 114
1171 404
1171 501
1171 781
1171 793
1171 1632
1171 1960
1171 2875
1172 8
1172 18
1172 64
1172 150
1172 195
1172 280
1172 336
1172 438
1172 1303
1172 1623
1172 2208
1172 2238
1172 4033
1172 4340
1173 7
1173 35
1173 213
1173 399
1173 903
1173 1674
1173 1732
1173 1774
1173 2282
1173 2787
1173 2866
1173 2905
1173 4773
1174 4
1174 130
1174 205
1174 407
1174 756
1174 1087
1174 1819
1174 2891
1174 3537
1174 4535
1174 4576
1174 4646
1174 4911
1175 43
1175 52
1175 91
1175 154
1175 187
1175 560
1175 2358
1175 3865
1175 4062
1175 4539
1176 1
1176 7
1176 29
1176 31
1176 297
1176 386
1176 430
1176 740
1176 975
1176 1307
1176 1359
1176 1370
1176 1583
1176 1620
1176 1621
1176 3524
1176 4139
1177 8
1177 17
1177 32
1177 112
1177 751
1177 3783
1177 4170
1178 14
1178 34
1178 67
1178 285
1178 292
1178 408
1178 1040
1178 1493
1178 1641
1178 1965
1178 1970
1178 2655
1178 2965
1178 3186
1178 4606
1179 8
1179 16
1179 17
1179 18
1179 60
1179 117
1179 258
1179 264
1179 818
1179 1559
1179 2343
1179 2578
1179 4403
1179 4692
1179 4942
1179 4992
1180 3
1180 18
1180 35
1180 131
1180 192
1180 923
1180 2936
1180 4880
1181 1
1181 18
1181 22
1181 1101
1181 2385
1181 2677
1181 3343
1181 3542
1181 4013
1181 4759
1182 14
1182 793
1182 2227
1183 0
1183 66
1183 85
1183 96
1183 192
1183 233
1183 273
1183 595
1183 901
1183 962
1183 1230
1183 1408
1183 1418
1183 1447
1183 1912
1183 2144
1183 2678
1183 2748
1183 3018
1183 3116
1183 3458
1183 3463
1183 3544
1183 4078
1183 4087
1183 4977
1184 14
1184 251
1184 677
1184 2428
1184 4924
1185 8
1185 10
1185 101
1185 185
1185 187
1185 514
1185 745
1185 1693
1185 1994
1185 2233
1185 2253
1185 3452
1185 3574
1185 4164
1185 4340
1185 4513
1185 4596
1186 0
1186 4
1186 231
1186 236
1186 893
1186 1218
1186 1378
1186 1523
1186 1727
1186 2193
1186 2656
1186 3640
1186 4190
1187 83
1187 544
1187 641
1187 771
1187 803
1187 854
1187 1103
1187 1207
1187 1462
1187 2644
1187 3239
1187 3911
1188 58
1188 232
1188 534
1188 632
1188 4016
1189 19
1189 26
1189 40
1189 197
1189 583
1189 1320
1189 1767
1189 1814
1189 2833
1189 3017
1189 3139
1189 4128
1190 20
1190 274
1190 276
1190 663
1190 1888
1190 2032
1190 2732
1191 15
1191 88
1191 263
1191 278
1191 4692
1192 9
1192 17
1192 30
1192 36
1192 76
1192 94
1192 95
1192 98
1192 522
1192 612
1192 1055
1192 1228
1192 1411
1192 1554
1192 1855
1192 2176
1192 2292
1192 2376
1192 2727
1192 2820
1192 2854
1192 2918
1192 3042
1192 3559
1192 4395
1192 4482
1192 4611
1192 4628
1193 14
1193 230
1193 1147
1193 2404
1193 2417
1193 2501
1193 3127
1194 2
1194 81
1194 144
1194 401
1194 797
1194 1340
1194 2444
1194 2885
1194 4306
1194 4743
1195 25
1195 28
1195 123
1195 159
1195 905
1195 1027
1195 1481
1195 1514
1195 2731
1195 2912
1195 3521
1195 3634
1195 4277
1195 4375
1195 4592
1195 4719
1195 4743
1196 15
1196 25
1196 84
1196 517
1196 959
1196 1118
1196 1168
1196 3329
1196 4339
1196 4772
1197 62
1197 95
1197 796
1197 2131
1197 2379
1197 2475
1197 3527
1197 4436
1197 4490
1197 4535
1197 4919
1198 8
1198 200
1198 246
1198 1089
1198 1321
1198 1670
1198 2068
1198 3073
1198 4335
1199 4
1199 18
1199 292
1199 1838
1199 2325
1199 2597
1199 3834
1199 4512
1200 14
1200 147
1200 393
1200 557
1200 676
1200 737
1200 876
1200 1306
1200 2081
1200 2630
1200 2685
1200 4090
1200 4883
1201 60
1201 125
1201 233
1201 695
1201 740
1201 770
1201 898
1201 1274
1201 2035
1201 2554
1201 2889
1201 3274
1201 3533
1201 4428
1201 4569
1202 18
1202 232
1202 517
1202 886
1202 2362
1202 2704
1202 2833
1202 3015
1202 3757
1202 3881
1203 7
1203 142
1203 240
1203 442
1203 479
1203 529
1203 846
1203 934
1203 983
1203 1221
1203 1290
1203 1404
1203 1526
1203 1533
1203 1555
1203 1602
1203 2085
1203 2096
1203 2177
1203 2190
1203 2613
1203 2716
1203 2888
1203 3588
1203 4555
1203 4565
1203 4950
1204 3
1204 32
1204 100
1204 169
1204 777
1204 1382
1204 2909
1204 3598
1204 3908
1204 4301
1205 14
1205 18
1205 451
1205 514
1205 771
1205 2273
1205 2453
1205 3391
1205 4136
1205 4872
1206 4
1206 7
1206 14
1206 134
1206 334
1206 591
1206 596
1206 1415
1206 2457
1206 3744
1206 4053
1206 4358
1207 4
1207 7
1207 17
1207 18
1207 35
1207 656
1207 1072
1207 1187
1207 2688
1207 2840
1207 3356
1207 3779
1208 154
1208 492
1208 711
1208 721
1208 984
1208 2518
1208 2857
1208 3861
1208 4375
1208 4680
1209 0
1209 17
1209 62
1209 130
1209 355
1209 906
1209 1636
1209 2038
1209 3391
1210 7
1210 12
1210 243
1210 500
1210 601
1210 828
1210 1053
1210 1490
1210 1561
1210 1614
1210 1664
1210 1895
1210 2178
1210 2842
1210 2874
1210 3024
1210 3033
1210 3353
1210 3811
1210 3989
1210 4617
1211 71
1211 79
1211 121
1211 840
1211 1089
1211 1685
1211 1720
1211 3957
1212 7
1212 493
1212 517
1212 934
1212 1162
1213 0
1213 105
1213 213
1213 432
1213 477
1213 872
1213 1927
1213 2627
1213 2934
1213 3038
1213 3809
1213 4147
1213 4239
1213 4686
1214 12
1214 21
1214 27
1214 87
1215 1
1215 17
1215 19
1215 52
1215 54
1215 62
1215 788
1215 984
1215 1327
1215 1429
1215 1664
1215 2165
1215 2269
1215 2584
1215 2632
1215 3080
1215 3413
1215 4216
1215 4243
1215 4648
1216 5
1216 14
1216 33
1216 49
1216 125
1216 165
1216 526
1216 588
1216 1380
1216 1661
1216 1876
1216 1989
1216 2188
1216 2789
1216 3165
1216 3168
1216 3565
1216 3714
1216 4080
1216 4300
1216 4385
1216 4968
1217 0
1217 1
1217 8
1217 19
1217 25
1217 120
1217 185
1217 262
1218 34
1218 56
1218 185
1218 823
1218 1140
1218 1186
1218 1373
1218 1841
1218 2013
1218 2176
1218 2231
1218 2269
1218 2469
1218 3426
1218 4607
1219 6
1219 15
1219 38
1219 325
1219 348
1219 934
1219 980
1219 1774
1219 2194
1220 2
1220 3
1220 75
1220 264
1220 302
1220 541
1220 984
1220 1080
1220 1125
1220 1575
1220 2304
1220 2366
1220 2632
1220 2701
1220 2896
1220 3009
1220 3577
1220 4288
1220 4345
1220 4744
1220 4818
1220 4880
1221 17
1221 50
1221 95
1221 674
1221 982
1221 1119
1221 1203
1221 2503
1221 3369
1221 4747
1222 14
1222 509
1222 1424
1222 2134
1222 3437
1223 10
1223 31
1223 91
1223 193
1223 2062
1223 4143
1224 6
1224 15
1224 67
1224 449
1224 819
1225 131
1225 343
1225 504
1225 1285
1225 2053
1225 2660
1225 4647
1226 36
1226 77
1226 247
1226 670
1226 750
1226 1481
1226 2423
1226 2984
1226 3327
1226 4273
1226 4285
1226 4629
1226 4717
1227 66
1227 139
1227 166
1227 206
1227 230
1227 666
1227 890
1227 1140
1227 1485
1227 2186
1227 2757
1227 3212
1227 3952
1227 3976
1227 4299
1227 4757
1228 13
1228 17
1228 105
1228 457
1228 501
1228 571
1228 1192
1228 1489
1228 3274
1229 45
1229 51
1229 104
1229 335
1229 345
1229 995
1229 1329
1229 1438
1229 4068
1229 4350
1230 2
1230 5
1230 301
1230 337
1230 357
1230 421
1230 440
1230 1120
1230 1131
1230 1183
1230 1397
1230 2035
1230 2354
1230 2443
1230 2571
1230 2963
1230 3040
1230 3752
1230 4127
1230 4267
1230 4274
1230 4969
1231 14
1231 19
1231 575
1231 857
1231 2795
1231 3863
1231 4058
1231 4441
1231 4470
1231 4691
1232 18
1232 251
1232 263
1232 597
1232 3042
1233 15
1233 35
1233 179
1233 195
1233 298
1233 495
1233 754
1233 911
1233 1129
1233 1361
1233 1705
1233 1769
1233 2118
1233 2476
1233 3453
1233 3618
1233 3755
1233 4057
1233 4339
1234 8
1234 40
1234 78
1234 286
1234 406
1234 419
1234 705
1234 1061
1234 1146
1234 1252
1234 1281
1234 1600
1234 1842
1234 1864
1234 1892
1234 1942
1234 2005
1234 2028
1234 2419
1234 2885
1234 4111
1234 4975
1235 0
1235 23
1235 51
1235 106
1235 645
1235 832
1235 1106
1235 1309
1235 1505
1235 1588
1235 1734
1235 1801
1235 1916
1235 2526
1235 3048
1235 3639
1235 4381
1236 5
1236 15
1236 603
1237 27
1237 67
1237 171
1237 343
1237 654
1237 740
1237 984
1237 1835
1237 2273
1237 3065
1237 3351
1237 3487
1237 3599
1237 3796
1237 4457
1237 4950
1238 4
1238 6
1238 10
1238 144
1238 202
1238 901
1238 1581
1238 2541
1238 4157
1238 4311
1239 4
1239 7
1239 19
1239 274
1239 337
1239 378
1239 814
1239 928
1239 1428
1239 1885
1239 2633
1239 2928
1239 4059
1239 4309
1239 4378
1239 4916
1240 17
1240 243
1240 282
1240 524
1240 531
1240 828
1240 1282
1240 1345
1240 1432
1240 1797
1240 2502
1240 3481
1240 3636
1240 3649
1240 4018
1241 11
1241 19
1241 174
1241 280
1241 281
1241 511
1241 982
1241 1349
1241 2494
1241 3066
1241 3634
1241 3927
1242 4
1242 89
1242 237
1242 360
1242 769
1242 1026
1242 1735
1242 1969
1242 2003
1242 2353
1242 2362
1242 3705
1242 3876
1242 3999
1242 4723
1242 4932
1243 0
1243 3
1243 12
1243 171
1243 399
1243 534
1243 923
1243 1029
1243 1319
1243 2035
1243 2321
1243 3000
1243 3454
1243 3626
1243 3700
1243 4332
1243 4825
1243 4944
1244 19
1244 35
1244 186
1244 1147
1244 2196
1244 2313
1244 4002
1244 4271
1244 4966
1245 0
1245 5
1245 8
1245 11
1245 51
1245 197
1245 947
1245 1652
1245 1700
1245 2431
1245 3706
1245 3859
1245 4783
1246 30
1246 69
1246 495
1246 615
1246 721
1246 4288
1247 3
1247 13
1247 45
1247 82
1247 190
1247 2576
1247 3254
1247 3999
1248 57
1248 79
1248 95
1248 118
1248 131
1248 468
1248 611
1248 718
1248 956
1248 1545
1248 1614
1248 1620
1248 1841
1248 2110
1248 2627
1248 2749
1248 2812
1248 3378
1248 3632
1248 4205
1249 62
1249 198
1249 237
1249 408
1249 854
1249 1127
1249 2038
1249 2689
1249 3723
1249 4971
1250 224
1250 798
1250 2777
1250 3546
1250 3604
1251 5
1251 193
1251 243
1251 282
1251 311
1251 336
1251 394
1251 1142
1251 2984
1251 3841
1251 4702
1251 4854
1252 16
1252 101
1252 227
1252 596
1252 1234
1252 3331
1253 2
1253 8
1253 18
1253 57
1253 59
1253 289
1253 394
1253 1842
1253 1962
1253 2102
1253 4072
1253 4364
1253 4711
1254 0
1254 74
1254 196
1254 213
1254 684
1254 837
1254 1724
1254 3994
1254 4866
1255 7
1255 51
1255 72
1255 232
1255 426
1255 854
1255 3095
1256 8
1256 58
1256 75
1256 172
1256 287
1256 709
1256 1055
1256 1897
1256 3173
1256 4003
1257 4
1257 14
1257 23
1257 111
1257 867
1257 870
1257 1395
1257 2284
1257 2513
1257 3207
1257 3377
1258 8
1258 27
1258 72
1258 121
1258 218
1258 264
1258 399
1258 846
1258 1062
1258 1520
1258 2432
1258 2438
1258 3297
1258 4813
1259 1
1259 10
1259 100
1259 720
1259 793
1259 1869
1259 2234
1259 2242
1259 2642
1259 3515
1259 4023
1259 4141
1259 4740
1260 7
1260 19
1260 164
1260 1366
1260 3063
1261 174
1261 294
1261 363
1261 635
1261 685
1261 997
1261 1040
1261 2201
1261 4635
1261 4881
1262 1
1262 63
1262 159
1262 287
1262 312
1262 379
1262 503
1262 1803
1262 1820
1262 2112
1262 2285
1262 2669
1262 3077
1262 3578
1262 4044
1263 5
1263 6
1263 17
1263 205
1263 943
1263 987
1263 1299
1263 1423
1263 1861
1263 2845
1263 2996
1264 10
1264 12
1264 35
1264 1123
1264 1161
1264 1396
1264 1659
1264 2120
1264 3128
1264 3390
1264 3420
1264 4669
1265 15
1265 39
1265 51
1265 72
1265 525
1265 796
1266 105
1266 517
1266 825
1266 1033
1266 1092
1266 3138
1266 4345
1267 442
1268 43
1268 122
1268 274
1268 342
1268 459
1268 475
1268 489
1268 601
1268 1102
1268 1726
1268 2373
1268 3072
1268 4231
1269 18
1269 216
1269 316
1269 1034
1269 2950
1270 5
1270 28
1270 45
1270 56
1270 180
1270 191
1270 541
1270 766
1270 1322
1270 1887
1270 3831
1271 46
1271 91
1271 824
1271 1312
1271 4201
1272 15
1272 607
1272 980
1272 1011
1272 1369
1272 1537
1272 2447
1272 4578
1272 4689
1273 16
1273 58
1273 120
1273 849
1273 3326
1273 4882
1274 40
1274 298
1274 498
1274 803
1274 909
1274 1201
1274 1831
1274 2142
1274 3355
1274 3770
1274 3914
1275 6
1275 76
1275 94
1275 122
1275 442
1275 1134
1275 2599
1275 3024
1275 3092
1275 3614
1275 4110
1275 4785
1276 32
1276 127
1276 484
1276 1000
1276 1323
1276 1326
1276 1429
1276 1818
1276 2568
1276 3367
1276 3444
1276 3553
1276 3757
1276 3827
1276 4174
1276 4270
1276 4479
1277 2
1277 18
1277 120
1277 293
1277 364
1277 638
1277 1120
1277 2858
1277 2938
1277 3246
1277 4237
1277 4258
1278 1
1278 27
1278 31
1278 382
1278 640
1278 704
1278 2051
1278 2289
1278 3125
1278 3130
1278 4144
1279 0
1279 13
1279 33
1279 98
1279 174
1279 351
1279 778
1279 2094
1279 2448
1279 2885
1279 3020
1279 3307
1280 12
1280 169
1280 193
1280 330
1280 542
1280 749
1280 1063
1280 1538
1280 1881
1280 2653
1280 2752
1280 3547
1281 118
1281 364
1281 460
1281 1234
1281 1725
1281 1800
1281 1843
1281 4646
1281 4900
1282 8
1282 12
1282 42
1282 520
1282 1240
1282 2205
1282 2334
1282 2551
1282 2719
1283 29
1283 40
1283 398
1283 614
1283 1073
1283 3520
1283 4081
1284 3
1284 6
1284 110
1284 116
1284 174
1284 305
1284 319
1284 559
1284 560
1284 865
1284 1594
1284 1683
1284 1804
1284 2296
1284 2635
1284 2878
1284 3096
1284 4260
1285 6
1285 219
1285 293
1285 333
1285 446
1285 1225
1285 2196
1285 2231
1285 2861
1285 3048
1285 3920
1286 14
1286 186
1286 224
1286 537
1286 1320
1287 128
1287 131
1287 515
1287 741
1287 2771
1287 4143
1287 4173
1288 21
1288 60
1288 229
1288 980
1288 1553
1288 3289
1289 10
1289 13
1289 79
1289 134
1289 462
1289 928
1289 1825
1289 3807
1289 3861
1289 3984
1289 4854
1289 4961
1290 38
1290 69
1290 379
1290 504
1290 1203
1290 1998
1290 2424
1290 2729
1290 3603
1290 4809
1291 11
1291 51
1291 57
1291 269
1291 415
1291 766
1291 1660
1291 2314
1291 2539
1291 2910
1291 4977
1292 1
1292 9
1292 17
1292 174
1292 196
1292 220
1292 842
1292 1126
1292 1543
1292 2186
1292 2241
1292 3831
1293 33
1293 326
1293 387
1293 776
1293 2381
1293 3713
1293 4636
1294 9
1294 19
1294 24
1294 72
1294 83
1294 234
1294 475
1294 1859
1294 2428
1294 4929
1295 15
1295 21
1295 30
1295 262
1295 419
1295 693
1295 1308
1295 2616
1295 3257
1295 3469
1295 4148
1295 4931
1296 3
1296 17
1296 49
1296 293
1296 424
1296 815
1296 952
1296 1422
1296 1648
1296 1847
1296 2521
1296 2954
1296 3017
1296 3392
1296 3992
1296 4258
1296 4353
1297 8
1297 134
1297 216
1297 321
1297 345
1297 770
1297 2527
1297 3283
1297 3631
1297 4733
1298 10
1298 11
1298 273
1298 523
1298 959
1298 1027
1298 1106
1298 1956
1298 3221
1298 3973
1298 4047
1298 4539
1298 4929
1299 29
1299 175
1299 728
1299 744
1299 1156
1299 1263
1299 1514
1299 1923
1299 2404
1299 3450
1299 4167
1300 5
1300 17
1300 35
1300 120
1300 226
1300 380
1300 1652
1300 2425
1301 151
1301 339
1301 422
1301 778
1301 1013
1302 319
1302 422
1302 453
1302 1985
1303 48
1303 171
1303 306
1303 390
1303 578
1303 1172
1303 1333
1303 1505
1303 1510
1303 1607
1303 2408
1303 2535
1303 2686
1303 3655
1303 4084
1303 4830
1304 86
1304 161
1304 334
1304 347
1304 378
1304 410
1304 898
1304 1004
1304 1749
1304 1907
1304 2171
1304 2525
1304 3029
1304 3299
1304 3565
1304 4051
1305 101
1305 154
1305 282
1305 292
1305 664
1305 1097
1305 1138
1305 1636
1305 1977
1305 2243
1305 3375
1305 4717
1306 165
1306 1200
1306 2751
1306 2967
1307 27
1307 51
1307 54
1307 162
1307 241
1307 1042
1307 1176
1307 1322
1307 1624
1307 2102
1307 2203
1307 3147
1307 3170
1307 3691
1307 4775
1308 19
1308 66
1308 537
1308 650
1308 1295
1308 1670
1309 9
1309 17
1309 1235
1309 2968
1309 2980
1310 16
1310 95
1310 300
1310 546
1310 655
1310 4116
1310 4142
1311 505
1311 688
1312 14
1312 24
1312 196
1312 274
1312 1271
1312 1314
1312 2071
1312 2239
1312 2335
1312 3051
1312 4026
1312 4345
1313 10
1313 19
1313 157
1313 225
1313 256
1313 348
1313 603
1313 741
1313 1412
1313 1722
1313 1780
1313 2254
1313 2689
1313 3193
1313 3570
1313 3603
1314 12
1314 142
1314 196
1314 357
1314 1312
1314 1600
1314 1708
1314 1743
1314 1814
1314 2198
1314 2294
1314 2473
1314 2559
1314 2781
1314 2863
1314 4069
1314 4355
1315 5
1315 25
1315 145
1315 223
1315 540
1315 2259
1315 2533
1315 2556
1315 3295
1315 3514
1315 4334
1316 701
1316 719
1316 898
1316 1420
1316 4805
1317 2
1317 6
1317 17
1317 18
1317 274
1317 558
1317 733
1317 981
1317 1677
1317 1890
1317 1938
1317 2234
1317 2293
1317 2298
1317 2524
1317 3038
1317 3146
1317 3313
1318 279
1318 399
1318 451
1318 616
1318 677
1318 995
1318 1718
1318 2841
1318 3257
1318 3604
1318 4110
1318 4297
1318 4422
1319 12
1319 526
1319 733
1319 1243
1319 1351
1319 1863
1320 12
1320 31
1320 92
1320 306
1320 1189
1320 1286
1320 2065
1320 3326
1320 3957
1320 4999
1321 49
1321 246
1321 633
1321 1198
1321 1943
1321 2368
1321 2665
1321 2943
1321 3678
1322 14
1322 19
1322 88
1322 1006
1322 1102
1322 1270
1322 1307
1322 2502
1323 17
1323 219
1323 234
1323 282
1323 1021
1323 1276
1323 1474
1323 1640
1323 1736
1323 1822
1323 1963
1323 2477
1323 3100
1323 3725
1323 4382
1324 3
1324 14
1324 21
1324 70
1324 130
1324 141
1324 3140
1324 4371
1325 12
1325 35
1325 57
1325 199
1325 4920
1326 1
1326 9
1326 10
1326 65
1326 82
1326 185
1326 686
1326 854
1326 1276
1326 1430
1326 1715
1326 1910
1326 2233
1326 2710
1326 3153
1326 3289
1326 4157
1326 4369
1326 4659
1326 4979
1327 36
1327 120
1327 377
1327 1014
1327 1215
1327 1432
1327 1553
1327 1666
1327 1833
1327 1984
1327 3348
1327 3476
1327 3725
1328 4
1328 6
1328 19
1328 36
1328 56
1328 279
1328 707
1328 1395
1328 1684
1328 2549
1328 2641
1328 2660
1328 2860
1328 2969
1328 3367
1328 4603
1329 5
1329 35
1329 770
1329 855
1329 1072
1329 1229
1329 1641
1329 3088
1329 3312
1329 3634
1329 4814
1330 4
1330 84
1330 493
1330 677
1330 4265
1331 12
1331 40
1331 94
1331 601
1331 2165
1332 3
1332 7
1332 412
1332 655
1332 705
1332 2190
1332 2255
1332 2521
1332 3583
1332 4039
1332 4301
1332 4327
1333 7
1333 183
1333 374
1333 605
1333 1164
1333 1169
1333 1303
1333 1412
1333 1618
1333 1912
1333 1995
1333 2677
1333 3169
1333 3483
1333 4249
1333 4954
1334 9
1334 45
1334 220
1334 232
1334 614
1334 679
1334 1335
1334 1453
1334 2147
1334 2244
1334 2367
1334 2422
1334 4541
1335 5
1335 7
1335 23
1335 91
1335 293
1335 416
1335 679
1335 1334
1335 1478
1335 1673
1335 1885
1335 3360
1335 3898
1336 3
1337 5
1337 37
1337 202
1337 302
1337 3454
1338 29
1338 56
1338 244
1338 1142
1338 1146
1338 1442
1338 2339
1338 2438
1338 2727
1338 3121
1338 3298
1338 3421
1338 4657
1338 4667
1339 85
1339 110
1339 220
1339 317
1339 723
1339 800
1339 3225
1339 4323
1339 4840
1340 95
1340 197
1340 290
1340 342
1340 582
1340 617
1340 840
1340 968
1340 982
1340 1194
1340 1592
1340 1810
1340 1874
1340 1895
1340 1916
1340 1930
1340 2001
1340 2621
1340 2794
1340 2908
1340 2910
1340 2947
1340 3088
1340 3157
1340 3246
1340 3305
1340 3374
1340 3844
1340 3864
1340 3944
1340 4007
1340 4211
1340 4416
1340 4675
1340 4704
1340 4803
1341 30
1341 65
1341 131
1342 1
1342 5
1342 397
1342 837
1342 1600
1342 3350
1343 2
1343 27
1343 612
1343 712
1343 784
1343 863
1343 2179
1343 2791
1343 3272
1344 5
1344 12
1344 17
1344 413
1344 451
1344 2665
1344 4039
1345 79
1345 623
1345 655
1345 1240
1345 1491
1345 2814
1345 4853
1345 4947
1346 0
1346 23
1346 45
1346 48
1346 68
1346 159
1346 211
1346 588
1346 760
1346 1552
1346 1646
1346 1716
1346 2983
1346 3031
1346 3114
1346 4879
1346 4928
1347 0
1347 3
1347 18
1347 106
1347 167
1347 524
1347 590
1347 633
1347 2970
1348 144
1348 197
1348 1040
1348 3560
1349 84
1349 432
1349 683
1349 865
1349 884
1349 1241
1349 1357
1349 1436
1349 1532
1349 2284
1349 2583
1349 2711
1349 4491
1349 4569
1350 59
1350 543
1350 624
1350 2993
1350 4804
1351 2
1351 3
1351 29
1351 56
1351 444
1351 556
1351 603
1351 723
1351 1319
1351 1566
1351 1832
1351 1878
1351 2819
1351 3276
1351 3426
1351 3973
1351 4158
1351 4270
1351 4807
1351 4907
1352 194
1352 370
1352 795
1352 998
1352 2840
1352 4656
1353 34
1353 296
1353 400
1353 597
1353 634
1353 1738
1353 3125
1353 4792
1354 17
1354 80
1354 265
1354 268
1354 321
1354 326
1354 592
1354 607
1354 629
1354 885
1354 2011
1354 3877
1354 4214
1354 4500
1355 4
1355 21
1355 113
1355 114
1355 171
1355 353
1355 467
1355 1486
1355 2234
1355 3075
1355 3777
1355 3794
1355 4795
1356 7
1356 638
1356 847
1356 1442
1356 2364
1356 2648
1356 3400
1356 3688
1356 4340
1357 27
1357 148
1357 169
1357 187
1357 500
1357 540
1357 1349
1357 1399
1357 1423
1357 3219
1357 4078
1357 4558
1358 66
1358 141
1358 722
1358 2824
1359 2
1359 88
1359 1045
1359 1176
1359 1859
1360 9
1360 270
1360 442
1360 976
1360 1665
1360 1893
1360 2487
1360 2558
1360 2671
1360 3605
1360 4046
1360 4157
1360 4596
1361 194
1361 259
1361 351
1361 882
1361 949
1361 1233
1361 1792
1361 1923
1361 2596
1361 2734
1361 3207
1361 4954
1362 75
1362 91
1362 124
1362 561
1362 599
1362 886
1362 981
1362 1552
1362 1904
1362 2155
1362 2164
1362 2708
1362 2721
1362 2856
1362 3106
1362 4725
1362 4852
1363 52
1363 70
1363 193
1363 222
1363 721
1363 3143
1363 4196
1364 7
1364 717
1364 746
1365 5
1365 21
1365 30
1365 408
1365 500
1365 544
1365 984
1365 994
1365 1956
1365 3300
1365 3881
1365 3900
1365 4007
1366 6
1366 7
1366 95
1366 100
1366 496
1366 601
1366 1260
1366 3289
1366 3460
1366 3792
1367 0
1367 10
1367 36
1367 409
1367 445
1367 2053
1367 2658
1367 4836
1368 4
1368 21
1368 741
1368 3417
1369 12
1369 20
1369 22
1369 23
1369 299
1369 803
1369 1272
1369 1584
1369 2754
1369 2898
1369 3492
1369 3535
1369 4600
1370 5
1370 435
1370 497
1370 758
1370 976
1370 1176
1370 2051
1370 2417
1370 2708
1370 3584
1370 3643
1370 4515
1370 4743
1370 4927
1371 33
1371 148
1371 2517
1371 2827
1371 2832
1371 4003
1371 4440
1372 0
1372 6
1372 9
1372 23
1372 59
1372 415
1372 522
1372 2638
1372 4745
1372 4939
1373 1
1373 14
1373 19
1373 337
1373 674
1373 1218
1373 1659
1373 2267
1373 3351
1373 4502
1374 11
1374 51
1374 64
1374 308
1374 553
1374 560
1374 672
1374 2089
1374 2879
1374 3844
1374 4414
1374 4869
1375 17
1375 50
1375 72
1375 337
1375 886
1375 1561
1375 1832
1375 4152
1376 17
1376 955
1376 1047
1376 1948
1376 3415
1376 3488
1376 4519
1377 0
1377 3
1377 7
1377 538
1377 1585
1377 3346
1377 3557
1377 4899
1378 6
1378 20
1378 144
1378 277
1378 342
1378 942
1378 1186
1378 1770
1378 1857
1378 1941
1378 3097
1378 3474
1378 4743
1379 165
1379 287
1379 307
1379 557
1379 629
1379 690
1379 941
1379 1381
1379 1983
1379 2808
1379 3583
1379 3974
1379 4442
1380 10
1380 19
1380 648
1380 690
1380 904
1380 1216
1380 2756
1380 3379
1380 4394
1380 4547
1380 4864
1381 17
1381 71
1381 325
1381 390
1381 978
1381 1379
1381 2030
1381 2239
1381 2566
1381 2656
1381 3493
1381 3723
1381 4450
1382 74
1382 86
1382 174
1382 351
1382 1204
1382 4470
1382 4800
1383 3
1383 218
1383 258
1383 325
1383 369
1383 438
1383 889
1383 2794
1383 4803
1384 8
1384 48
1384 51
1384 324
1384 510
1384 4102
1385 683
1385 1039
1385 3642
1385 4104
1385 4370
1385 4711
1386 221
1386 278
1386 429
1386 3313
1386 3553
1386 3885
1387 20
1387 56
1387 96
1387 602
1387 735
1387 795
1387 1512
1387 1553
1387 2538
1388 18
1388 88
1388 164
1388 258
1388 342
1388 530
1388 1428
1388 1522
1388 1667
1388 2107
1389 27
1389 142
1389 242
1389 264
1389 311
1389 344
1389 670
1389 757
1389 1405
1389 1460
1389 1729
1389 1956
1389 2248
1389 3232
1389 3922
1389 4378
1389 4556
1389 4778
1390 3
1390 36
1390 58
1390 239
1390 454
1390 504
1390 1888
1390 2315
1390 3369
1390 4257
1390 4682
1391 2
1391 8
1391 11
1391 62
1391 888
1391 1090
1391 1519
1391 1627
1391 1786
1391 2436
1391 3724
1391 4260
1392 170
1392 396
1392 397
1392 501
1392 687
1392 1014
1392 1472
1392 3270
1392 3314
1392 3808
1392 3844
1392 4890
1393 15
1393 43
1393 497
1393 1675
1393 4533
1394 6
1394 17
1394 444
1394 450
1394 525
1394 2669
1394 3047
1394 3721
1394 4006
1394 4156
1395 17
1395 18
1395 136
1395 1257
1395 1328
1395 1517
1395 2582
1395 3019
1395 3938
1395 4016
1396 82
1396 1132
1396 1264
1396 1925
1396 2391
1396 3812
1396 4960
1397 105
1397 175
1397 258
1397 1230
1398 11
1398 14
1398 74
1398 688
1398 2186
1398 4761
1399 14
1399 59
1399 373
1399 399
1399 428
1399 449
1399 680
1399 1060
1399 1357
1399 1469
1399 2051
1399 3309
1399 4206
1400 159
1400 192
1400 397
1400 1053
1400 1082
1400 1468
1400 2319
1400 2433
1400 2489
1401 6
1401 27
1401 44
1401 230
1401 526
1401 537
1401 1125
1401 3249
1402 76
1402 115
1402 162
1402 415
1402 421
1402 2544
1402 3255
1403 2
1403 42
1403 183
1403 3656
1403 4032
1404 3
1404 7
1404 49
1404 890
1404 905
1404 1203
1404 2121
1404 2308
1404 2630
1404 3125
1404 4763
1405 8
1405 21
1405 73
1405 91
1405 362
1405 407
1405 553
1405 856
1405 1389
1405 1410
1405 1468
1405 1477
1405 1492
1405 1919
1405 1960
1405 2113
1405 2240
1405 2376
1405 2450
1405 2519
1405 3234
1405 3403
1405 3647
1405 4999
1406 45
1406 52
1406 91
1406 571
1406 624
1406 898
1406 1854
1406 2947
1406 3182
1406 3255
1406 3269
1406 3353
1406 3493
1406 3564
1406 3897
1406 4152
1407 134
1407 619
1407 872
1407 903
1407 1006
1407 2054
1407 2201
1407 2491
1407 2576
1407 3287
1407 3294
1407 3676
1407 4064
1407 4094
1408 18
1408 69
1408 86
1408 104
1408 157
1408 439
1408 487
1408 776
1408 1183
1408 1535
1408 1606
1408 3342
1408 3938
1409 10
1409 154
1409 232
1409 302
1409 326
1409 541
1409 867
1409 959
1409 1520
1409 3867
1409 4035
1409 4299
1409 4816
1410 8
1410 28
1410 370
1410 1166
1410 1405
1410 1519
1410 3027
1410 4656
1411 8
1411 220
1411 1192
1411 2376
1412 37
1412 427
1412 1313
1412 1333
1412 3468
1413 12
1413 107
1413 711
1413 1125
1413 1740
1413 2810
1413 3798
1414 86
1414 201
1414 259
1414 330
1414 493
1414 615
1414 1422
1414 1987
1414 3798
1414 3888
1415 0
1415 4
1415 52
1415 98
1415 393
1415 1206
1415 4512
1415 4715
1415 4801
1416 5
1416 178
1416 267
1416 333
1416 353
1416 656
1416 677
1416 994
1416 4374
1416 4522
1417 4
1417 20
1417 251
1417 408
1417 1022
1417 2928
1417 3421
1417 3655
1417 4517
1418 38
1418 336
1418 569
1418 637
1418 695
1418 1146
1418 1183
1418 1693
1418 1803
1418 2147
1418 3035
1418 3176
1418 3735
1418 4640
1418 4786
1419 51
1419 184
1419 664
1419 751
1419 1515
1419 3524
1419 4224
1419 4942
1420 0
1420 848
1420 1095
1420 1316
1420 1722
1420 1973
1420 2494
1420 4384
1421 8
1421 21
1421 150
1421 407
1421 488
1421 2802
1421 4040
1421 4528
1421 4575
1422 8
1422 389
1422 1296
1422 1414
1422 2011
1422 3451
1422 4008
1423 11
1423 19
1423 84
1423 176
1423 231
1423 251
1423 976
1423 1263
1423 1357
1423 1711
1423 2278
1423 2295
1423 2683
1423 2706
1423 2710
1423 2882
1423 3003
1423 3050
1423 3390
1423 3425
1423 3477
1423 3624
1423 3654
1423 4353
1423 4432
1423 4958
1424 3
1424 7
1424 1222
1424 2679
1424 3111
1425 0
1425 11
1425 242
1425 251
1425 717
1425 746
1425 1538
1425 2330
1425 2513
1425 3418
1425 3595
1426 25
1426 285
1426 383
1426 463
1426 559
1426 2073
1426 4320
1427 9
1427 68
1427 298
1427 475
1427 688
1427 743
1427 2020
1428 19
1428 27
1428 48
1428 232
1428 1239
1428 1388
1428 2246
1428 2911
1428 4035
1429 16
1429 18
1429 19
1429 22
1429 134
1429 579
1429 1215
1429 1276
1429 1872
1429 3145
1429 3159
1429 3448
1429 4134
1430 6
1430 8
1430 83
1430 899
1430 949
1430 1326
1430 1576
1430 1591
1430 2496
1430 2590
1430 2996
1430 3419
1430 3570
1431 13
1431 53
1431 216
1431 390
1431 479
1431 830
1431 914
1431 2584
1432 10
1432 39
1432 100
1432 266
1432 350
1432 1240
1432 1327
1432 2106
1432 2357
1432 2619
1432 3163
1432 3795
1433 35
1433 57
1433 94
1433 151
1433 163
1433 824
1433 1148
1433 1678
1433 2740
1433 3082
1433 4811
1434 8
1434 41
1434 84
1434 342
1434 799
1434 833
1434 1001
1434 1795
1434 2795
1434 3272
1434 3467
1434 4043
1434 4447
1434 4486
1435 2
1435 8
1435 226
1435 365
1435 514
1435 560
1435 679
1435 1936
1435 1954
1435 2344
1435 4602
1436 7
1436 9
1436 94
1436 552
1436 1349
1436 2095
1436 2415
1436 4567
1437 14
1437 26
1437 157
1437 745
1437 1550
1437 2598
1437 3084
1437 3223
1438 0
1438 547
1438 1229
1438 2210
1438 4051
1439 40
1439 60
1439 220
1439 549
1439 2644
1439 3320
1439 3942
1439 4115
1439 4771
1439 4947
1439 4970
1440 179
1440 193
1440 199
1440 506
1440 1075
1440 1158
1440 1963
1440 2190
1440 2556
1440 2727
1440 2967
1440 3876
1441 35
1441 64
1441 71
1441 202
1441 348
1441 1060
1441 1719
1441 2046
1441 2082
1441 2884
1441 3707
1442 259
1442 314
1442 1338
1442 1356
1442 1996
1442 2355
1442 2446
1442 3606
1442 3897
1442 4490
1442 4957
1443 1
1443 2
1443 104
1443 309
1443 378
1443 419
1443 502
1443 1787
1443 1834
1443 2097
1443 2532
1443 3568
1443 3914
1443 4822
1444 27
1444 33
1444 826
1444 1550
1444 2996
1444 3365
1445 72
1445 103
1445 118
1445 285
1445 525
1445 653
1445 668
1445 1106
1445 1133
1445 3409
1445 3428
1445 4644
1446 3
1446 51
1446 64
1446 72
1446 248
1447 9
1447 114
1447 150
1447 405
1447 414
1447 1183
1447 2118
1447 3174
1447 4265
1447 4277
1448 10
1448 11
1448 972
1448 1025
1449 37
1449 372
1449 456
1449 474
1449 791
1449 794
1449 1821
1449 2245
1449 3522
1450 3
1450 60
1450 307
1450 510
1450 1616
1450 2308
1450 2430
1450 2903
1450 4243
1451 1
1451 2
1451 7
1451 31
1451 45
1451 54
1451 128
1451 301
1451 2022
1451 2059
1452 3
1452 7
1452 105
1452 306
1452 449
1452 569
1452 968
1452 2683
1452 3430
1452 4342
1453 79
1453 430
1453 1334
1453 3889
1454 10
1454 227
1454 343
1454 352
1454 898
1455 38
1455 64
1455 193
1455 224
1455 876
1455 1497
1455 4149
1455 4580
1456 4
1456 6
1456 7
1456 12
1456 86
1456 583
1456 994
1456 1576
1456 2214
1456 2492
1456 2544
1456 2878
1456 3002
1456 3093
1456 3102
1456 3322
1456 3537
1456 4430
1457 11
1457 418
1457 519
1457 3148
1458 0
1458 1
1458 25
1458 95
1458 209
1458 551
1458 856
1458 1082
1458 1816
1458 1939
1458 2473
1458 3294
1458 4059
1458 4736
1459 815
1460 2
1460 4
1460 35
1460 71
1460 294
1460 296
1460 1389
1460 1613
1460 1628
1460 2277
1460 2384
1460 3720
1460 3841
1460 4043
1460 4045
1460 4388
1461 16
1461 433
1461 515
1461 1925
1462 6
1462 73
1462 189
1462 463
1462 907
1462 1107
1462 1187
1462 1921
1462 3690
1463 0
1463 9
1463 59
1463 383
1463 1610
1463 2037
1463 2746
1463 4482
1463 4872
1463 4894
1464 2
1464 25
1464 413
1464 682
1464 934
1464 4442
1464 4599
1465 415
1465 3443
1465 3499
1465 3648
1466 13
1466 176
1466 215
1466 1048
1466 3294
1467 1
1467 7
1467 447
1467 549
1467 601
1467 980
1467 2060
1467 2252
1467 2253
1467 2522
1467 2895
1467 3803
1467 4026
1468 13
1468 48
1468 225
1468 883
1468 1400
1468 1405
1468 3323
1468 4268
1469 20
1469 35
1469 149
1469 187
1469 259
1469 378
1469 1399
1469 2860
1469 4156
1469 4165
1469 4643
1469 4958
1470 65
1470 78
1470 98
1470 405
1470 550
1470 865
1470 1788
1470 2052
1470 3186
1470 4136
1471 21
1471 276
1471 307
1471 335
1471 876
1471 2760
1471 2946
1472 340
1472 381
1472 498
1472 1392
1472 3791
1472 4121
1473 14
1473 35
1473 99
1473 147
1473 229
1473 231
1473 300
1473 335
1473 1526
1473 2298
1473 2474
1473 2499
1473 3005
1474 2
1474 10
1474 85
1474 91
1474 287
1474 353
1474 415
1474 630
1474 1045
1474 1323
1474 2497
1474 2870
1474 4038
1474 4406
1474 4786
1475 267
1475 611
1475 1086
1475 2029
1475 2097
1476 7
1476 14
1476 17
1476 196
1476 227
1476 581
1476 867
1476 882
1476 1080
1476 1549
1476 1619
1476 1930
1476 2284
1476 2719
1476 3160
1476 3310
1476 3985
1476 4498
1476 4587
1477 22
1477 49
1477 230
1477 244
1477 452
1477 628
1477 769
1477 1075
1477 1405
1477 1567
1477 1939
1477 2707
1477 3447
1477 3806
1477 4368
1477 4968
1478 334
1478 353
1478 748
1478 821
1478 842
1478 1045
1478 1170
1478 1335
1478 1648
1478 1722
1478 1725
1478 1860
1478 2297
1478 2639
1478 3634
1478 4873
1479 2
1479 4
1479 14
1479 60
1479 2342
1479 2471
1479 3091
1479 3600
1479 3637
1479 4212
1479 4589
1480 1
1480 12
1480 209
1480 527
1480 1040
1480 2066
1480 2636
1480 4623
1481 259
1481 570
1481 1195
1481 1226
1481 1744
1481 2769
1482 4
1482 5
1482 10
1482 35
1482 209
1482 276
1482 1137
1482 1522
1482 1566
1482 1689
1482 1972
1482 2074
1482 2689
1482 3316
1482 3374
1482 3849
1482 4649
1482 4730
1482 4757
1483 258
1483 289
1483 348
1483 505
1483 3452
1483 4228
1484 42
1484 70
1484 442
1484 1687
1485 8
1485 41
1485 171
1485 379
1485 574
1485 775
1485 1227
1485 1557
1485 1995
1485 2114
1485 3246
1485 3668
1485 4850
1485 4996
1486 294
1486 641
1486 704
1486 1355
1486 3295
1486 4499
1487 9
1487 41
1487 159
1487 205
1487 214
1487 219
1487 364
1487 497
1487 814
1487 1796
1487 2312
1487 2541
1487 2605
1487 2834
1487 2929
1487 3163
1487 3478
1487 3703
1487 3744
1487 4423
1487 4448
1488 16
1488 43
1488 75
1488 144
1488 261
1488 476
1488 832
1488 1678
1488 2160
1488 2195
1488 2699
1488 4236
1489 33
1489 91
1489 360
1489 709
1489 1228
1489 2667
1490 98
1490 104
1490 123
1490 432
1490 1210
1490 2093
1490 3053
1490 4111
1491 8
1491 18
1491 38
1491 44
1491 62
1491 85
1491 185
1491 1345
1491 4503
1492 8
1492 116
1492 583
1492 611
1492 1013
1492 1405
1492 2089
1492 2556
1492 2735
1492 3334
1492 3613
1492 3905
1493 15
1493 232
1493 467
1493 694
1493 729
1493 852
1493 880
1493 1178
1493 1745
1493 1793
1493 3319
1493 3894
1494 2
1494 11
1494 17
1494 23
1494 56
1494 134
1494 570
1494 2149
1494 2603
1494 2760
1494 2969
1494 3581
1494 3694
1494 4027
1494 4633
1495 10
1495 11
1495 165
1495 198
1495 975
1495 2474
1495 4075
1495 4859
1496 61
1496 88
1496 170
1496 189
1496 199
1496 282
1496 289
1496 466
1496 499
1496 1135
1496 1833
1496 2368
1496 2593
1496 3500
1496 3853
1496 3870
1496 3880
1496 4027
1496 4880
1497 48
1497 95
1497 131
1497 156
1497 234
1497 324
1497 781
1497 1052
1497 1144
1497 1161
1497 1455
1497 1569
1497 1620
1497 2832
1497 2944
1497 3430
1497 3490
1497 3576
1497 3665
1497 3696
1497 3802
1497 3873
1497 4408
1497 4692
1497 4855
1498 1
1498 407
1498 414
1498 952
1498 2163
1498 4685
1499 3
1499 6
1499 40
1499 67
1499 185
1499 202
1499 248
1499 2617
1499 3530
1500 202
1500 382
1500 652
1501 2
1501 61
1501 451
1501 655
1501 821
1501 1106
1501 1611
1501 2700
1501 4967
1502 12
1502 241
1502 245
1502 592
1502 1087
1502 2657
1502 3005
1502 3652
1502 3943
1503 6
1503 37
1503 62
1503 511
1503 629
1503 674
1503 2179
1503 2421
1503 2931
1503 4043
1503 4960
1504 6
1504 16
1504 52
1504 108
1504 162
1504 1024
1504 2285
1504 2447
1504 3700
1504 3961
1505 30
1505 38
1505 496
1505 505
1505 1235
1505 1303
1505 1957
1505 2154
1505 2767
1505 4718
1506 2
1506 19
1506 94
1506 545
1506 1921
1506 2258
1506 3994
1507 35
1507 69
1507 88
1507 503
1507 513
1507 592
1507 2329
1507 2512
1507 2588
1507 4121
1507 4331
1507 4740
1508 10
1508 12
1508 342
1508 624
1508 920
1508 1033
1508 1915
1508 3144
1508 3231
1508 3449
1508 3726
1508 3762
1508 4954
1509 4
1509 5
1509 144
1509 898
1509 2207
1510 7
1510 13
1510 16
1510 17
1510 18
1510 327
1510 429
1510 1303
1511 0
1511 3
1511 148
1511 426
1511 954
1512 57
1512 375
1512 1387
1512 2448
1512 2973
1513 181
1513 248
1513 265
1513 436
1513 1088
1513 3384
1513 4569
1514 10
1514 828
1514 1195
1514 1299
1514 1947
1515 18
1515 309
1515 574
1515 960
1515 1419
1515 1690
1515 2450
1515 2458
1515 3450
1515 3636
1516 14
1516 34
1516 430
1516 898
1516 955
1516 1000
1516 1022
1516 1918
1516 2405
1516 3280
1516 3428
1516 3533
1516 4060
1517 5
1517 56
1517 193
1517 253
1517 273
1517 851
1517 1005
1517 1395
1517 1582
1517 3068
1517 3637
1518 118
1518 252
1518 289
1518 1012
1519 4
1519 45
1519 278
1519 474
1519 537
1519 602
1519 818
1519 1391
1519 1410
1519 2068
1519 2328
1519 2381
1519 2949
1519 3641
1519 4859
1520 2
1520 18
1520 136
1520 175
1520 185
1520 197
1520 728
1520 828
1520 1043
1520 1258
1520 1409
1520 1793
1520 2640
1520 3153
1521 0
1521 14
1521 40
1521 54
1521 477
1521 667
1521 1608
1521 1767
1521 1897
1521 1916
1521 2484
1521 2693
1521 2979
1521 3687
1521 4270
1522 22
1522 810
1522 1388
1522 1482
1522 3300
1522 4380
1523 2
1523 59
1523 137
1523 980
1523 1148
1523 1186
1523 1859
1523 2534
1523 3057
1523 3336
1523 3630
1523 4231
1523 4823
1523 4843
1524 17
1524 35
1524 84
1524 3916
1525 417
1525 425
1525 506
1525 597
1525 933
1525 2174
1525 3472
1525 3478
1525 3796
1525 4047
1526 2
1526 17
1526 83
1526 1203
1526 1473
1526 1842
1526 2174
1527 186
1527 510
1527 720
1527 4705
1528 3
1528 6
1528 76
1528 847
1528 1089
1528 2926
1529 45
1529 51
1529 66
1529 131
1529 341
1529 695
1529 2562
1529 3334
1529 3405
1529 3478
1529 4568
1530 0
1530 16
1530 18
1530 416
1530 837
1530 1599
1530 2420
1530 3032
1530 4057
1530 4311
1530 4801
1531 1
1531 224
1531 951
1531 1039
1532 185
1532 1349
1533 12
1533 311
1533 338
1533 778
1533 928
1533 932
1533 1203
1533 2349
1533 2411
1533 2523
1533 3461
1533 3502
1533 3699
1533 4118
1533 4819
1534 63
1534 143
1534 325
1534 494
1534 641
1534 3891
1535 5
1535 8
1535 23
1535 37
1535 104
1535 383
1535 686
1535 696
1535 1408
1535 1677
1535 2163
1535 2273
1535 2787
1535 2935
1535 2953
1535 2989
1535 3352
1536 0
1536 133
1536 182
1536 506
1536 3081
1536 4883
1536 4923
1537 22
1537 45
1537 553
1537 1022
1537 1272
1537 2929
1537 3085
1537 3296
1537 3770
1537 3842
1537 3897
1537 3982
1537 4157
1537 4418
1538 8
1538 16
1538 147
1538 509
1538 1146
1538 1280
1538 1425
1538 1746
1538 2211
1538 2419
1538 4212
1539 4
1539 102
1539 120
1539 624
1540 2
1540 5
1540 6
1540 15
1540 17
1540 30
1540 93
1540 2674
1540 2772
1540 3267
1540 3725
1540 4936
1541 0
1541 14
1541 47
1541 72
1541 175
1541 225
1541 597
1541 686
1541 704
1541 952
1541 1044
1541 1954
1541 2440
1541 2901
1541 2973
1541 3175
1541 3718
1541 3914
1541 4153
1541 4748
1542 12
1542 96
1542 101
1542 244
1542 629
1542 656
1542 2410
1542 3357
1543 5
1543 14
1543 19
1543 20
1543 504
1543 1292
1543 1909
1543 2030
1543 3542
1543 3790
1544 37
1544 57
1544 3356
1544 4066
1545 9
1545 18
1545 32
1545 163
1545 246
1545 780
1545 1248
1545 2700
1545 2848
1545 3941
1546 15
1546 104
1546 199
1546 352
1546 445
1546 1011
1546 1015
1546 1805
1546 2805
1546 3081
1546 3107
1546 3732
1547 289
1547 410
1547 509
1547 765
1547 2900
1547 3527
1547 4860
1548 9
1548 23
1548 38
1548 128
1548 231
1548 430
1548 858
1548 2223
1548 2311
1548 3535
1548 3718
1549 113
1549 586
1549 1476
1549 3967
1550 5
1550 33
1550 107
1550 482
1550 1080
1550 1437
1550 1444
1550 1837
1550 2368
1550 2454
1550 2481
1550 2670
1550 2886
1550 4040
1550 4232
1551 29
1551 43
1551 66
1551 167
1551 186
1551 314
1551 339
1551 351
1551 777
1551 1711
1551 2550
1551 3644
1551 4897
1552 10
1552 1346
1552 1362
1553 2
1553 56
1553 71
1553 95
1553 439
1553 996
1553 1288
1553 1327
1553 1387
1553 1810
1553 2952
1553 4345
1553 4773
1554 29
1554 207
1554 845
1554 898
1554 1119
1554 1192
1554 1899
1554 4291
1555 35
1555 125
1555 324
1555 573
1555 652
1555 759
1555 824
1555 1203
1555 1748
1555 2100
1555 2580
1555 3093
1556 21
1556 52
1556 174
1556 878
1556 893
1556 2802
1556 4552
1556 4600
1557 9
1557 20
1557 25
1557 131
1557 907
1557 987
1557 1485
1557 3800
1557 4002
1558 373
1558 394
1558 1024
1558 1088
1558 3507
1559 16
1559 193
1559 251
1559 363
1559 472
1559 1099
1559 1179
1559 3701
1560 3
1560 218
1560 274
1560 399
1560 1033
1560 1675
1560 2389
1560 3490
1560 4647
1561 1
1561 246
1561 351
1561 424
1561 657
1561 811
1561 865
1561 1210
1561 1375
1561 2018
1561 3289
1561 3765
1561 4330
1562 1
1562 2
1562 10
1562 44
1562 854
1563 170
1563 664
1563 691
1563 1085
1563 2047
1563 2239
1563 2557
1563 4801
1564 48
1564 409
1564 641
1564 1844
1564 2452
1564 4545
1564 4596
1564 4695
1565 211
1565 252
1565 892
1566 8
1566 144
1566 1351
1566 1482
1566 2856
1566 4737
1567 41
1567 199
1567 484
1567 647
1567 985
1567 1477
1567 2149
1567 2458
1567 3352
1568 10
1568 14
1568 475
1568 493
1568 773
1568 2720
1568 4658
1569 13
1569 709
1569 1497
1569 1913
1569 2602
1569 2762
1569 3105
1569 4751
1569 4779
1570 10
1570 12
1570 325
1570 2443
1570 4909
1571 142
1571 206
1571 336
1571 424
1571 868
1571 1063
1571 1944
1571 2766
1571 2910
1571 4663
1571 4870
1572 6
1572 18
1572 114
1572 448
1572 778
1572 843
1572 1718
1572 2298
1572 2356
1572 2819
1572 3264
1573 6
1573 142
1573 350
1573 451
1573 1069
1573 3633
1573 3811
1573 4381
1573 4801
1573 4865
1573 4912
1574 17
1574 282
1574 504
1574 1642
1574 2084
1574 2710
1575 3
1575 17
1575 76
1575 87
1575 486
1575 674
1575 1220
1575 1644
1575 3123
1575 3882
1576 18
1576 293
1576 1430
1576 1456
1576 2363
1576 2559
1576 3085
1576 3933
1577 6
1577 12
1577 27
1577 122
1577 343
1577 2128
1577 2550
1577 2617
1577 4169
1578 17
1578 38
1578 99
1578 179
1578 430
1578 474
1578 596
1578 1589
1578 1976
1578 2037
1578 2804
1578 3239
1578 4410
1579 1
1579 18
1579 569
1579 602
1579 612
1579 1089
1579 1682
1579 3586
1579 4555
1580 14
1580 47
1580 171
1580 179
1580 469
1580 720
1580 786
1580 986
1580 2046
1581 1
1581 2
1581 10
1581 169
1581 222
1581 698
1581 814
1581 871
1581 1013
1581 1238
1581 1724
1581 1963
1581 2008
1581 2062
1581 2916
1581 3772
1581 4182
1581 4395
1581 4653
1581 4683
1581 4926
1582 11
1582 483
1582 546
1582 1517
1583 89
1583 267
1583 348
1583 1176
1583 2330
1583 4826
1584 70
1584 85
1584 179
1584 324
1584 358
1584 533
1584 976
1584 1037
1584 1085
1584 1369
1584 2205
1584 2375
1584 2923
1584 3124
1584 3327
1584 4099
1584 4164
1584 4362
1584 4456
1584 4529
1584 4827
1585 6
1585 261
1585 989
1585 1377
1586 5
1586 170
1586 229
1586 643
1586 791
1586 1606
1586 1983
1586 1998
1586 3803
1586 3857
1586 4529
1587 4
1587 17
1587 18
1587 202
1587 353
1587 754
1587 1708
1587 3213
1587 3373
1587 3496
1587 3710
1587 3931
1587 4805
1587 4946
1588 3
1588 102
1588 1235
1588 4017
1589 23
1589 889
1589 1578
1589 1786
1590 2
1590 17
1590 22
1590 54
1590 122
1590 258
1590 646
1590 2332
1590 2744
1590 3926
1590 4496
1591 40
1591 85
1591 139
1591 423
1591 528
1591 860
1591 931
1591 1430
1591 2041
1591 2329
1591 2440
1591 2706
1591 2850
1591 3785
1591 4375
1591 4689
1592 3
1592 35
1592 328
1592 430
1592 515
1592 882
1592 1340
1592 2722
1592 2905
1592 2995
1592 3714
1592 3862
1593 6
1593 19
1593 111
1593 120
1593 194
1593 234
1593 689
1593 2462
1593 2660
1593 2744
1593 2828
1593 2845
1593 3325
1593 3598
1593 3635
1593 3646
1593 4304
1594 4
1594 35
1594 170
1594 682
1594 1284
1594 1889
1594 3438
1594 3557
1594 4787
1595 411
1595 721
1595 816
1595 3042
1595 3191
1595 4734
1596 14
1596 131
1596 414
1596 1014
1596 3460
1597 35
1597 50
1597 157
1597 165
1597 184
1597 342
1597 916
1597 1016
1597 1704
1597 1799
1597 2633
1597 2762
1597 3799
1597 4008
1597 4367
1597 4439
1597 4718
1598 27
1598 200
1598 223
1598 3090
1598 3382
1598 4188
1598 4463
1599 5
1599 157
1599 265
1599 785
1599 1530
1600 242
1600 484
1600 754
1600 955
1600 1234
1600 1314
1600 1342
1600 2208
1600 3236
1600 4519
1600 4947
1601 2
1601 617
1601 2975
1602 7
1602 9
1602 13
1602 226
1602 691
1602 1203
1602 2216
1602 2413
1602 3103
1603 0
1603 3
1603 11
1603 12
1603 308
1603 414
1603 1666
1603 1820
1603 2501
1603 2541
1603 2835
1604 23
1604 49
1604 469
1604 837
1604 953
1604 1914
1604 2060
1604 2113
1604 3298
1604 3382
1604 3919
1605 35
1605 78
1605 167
1605 719
1606 68
1606 540
1606 1408
1606 1586
1606 2543
1606 4178
1607 72
1607 86
1607 478
1607 671
1607 692
1607 759
1607 842
1607 950
1607 974
1607 1303
1607 2957
1607 3187
1607 3350
1608 18
1608 199
1608 204
1608 777
1608 1107
1608 1521
1608 4103
1609 215
1609 447
1609 630
1609 1001
1609 1040
1609 2208
1610 40
1610 278
1610 1463
1610 1850
1610 2744
1610 2819
1610 4301
1610 4868
1611 0
1611 2
1611 1501
1611 2170
1611 2351
1611 2549
1611 2838
1611 3504
1611 3778
1611 4021
1611 4165
1611 4397
1612 3
1612 24
1612 27
1612 506
1612 1733
1612 2033
1612 4319
1613 11
1613 175
1613 545
1613 602
1613 679
1613 1460
1613 1889
1613 2257
1613 2385
1613 2579
1614 3
1614 17
1614 45
1614 338
1614 400
1614 794
1614 870
1614 984
1614 1210
1614 1248
1615 351
1615 453
1615 621
1615 744
1615 746
1615 3375
1616 7
1616 19
1616 532
1616 827
1616 916
1616 1450
1616 1803
1616 3480
1616 3734
1617 0
1617 4
1617 5
1617 19
1617 916
1617 2150
1617 4375
1617 4837
1618 32
1618 59
1618 349
1618 653
1618 854
1618 1333
1618 3044
1618 3139
1618 4103
1618 4737
1619 8
1619 33
1619 221
1619 360
1619 766
1619 1476
1619 3126
1620 20
1620 315
1620 591
1620 1176
1620 1248
1620 1497
1620 1684
1620 2844
1620 2849
1620 3165
1620 3264
1620 3479
1620 3540
1620 4713
1621 6
1621 8
1621 648
1621 664
1621 1176
1621 1843
1621 2870
1621 3517
1621 4742
1622 19
1622 142
1622 344
1622 454
1622 1889
1622 2010
1622 3777
1622 4097
1622 4207
1622 4330
1622 4936
1623 19
1623 468
1623 618
1623 1124
1623 1172
1623 2157
1623 2290
1623 2627
1623 4752
1623 4841
1624 12
1624 24
1624 154
1624 529
1624 1089
1624 1307
1624 2484
1624 2678
1624 2706
1624 3362
1624 3451
1624 4052
1624 4296
1624 4386
1624 4829
1625 0
1625 15
1625 92
1625 156
1625 656
1625 1011
1625 2557
1625 3157
1625 3848
1626 10
1626 98
1626 186
1626 211
1626 398
1626 499
1626 960
1626 1007
1626 1922
1626 2025
1626 2339
1626 3640
1626 4178
1627 14
1627 140
1627 330
1627 1391
1627 2993
1627 4316
1628 7
1628 94
1628 424
1628 805
1628 1460
1628 1861
1628 1878
1628 2926
1628 4873
1629 66
1629 74
1629 365
1629 414
1629 523
1629 971
1629 3288
1630 246
1630 344
1630 444
1630 567
1630 2854
1631 2
1631 4
1631 10
1631 531
1631 1855
1632 679
1632 968
1632 1171
1632 1648
1632 2517
1632 2967
1632 2986
1632 3023
1632 3128
1632 3823
1632 4193
1632 4605
1633 22
1633 142
1633 1033
1633 1919
1633 3976
1633 4172
1633 4605
1634 1
1634 11
1634 412
1634 2372
1635 2
1635 8
1635 27
1635 65
1635 226
1635 447
1635 577
1635 852
1635 1685
1635 1828
1635 1893
1635 2695
1635 3007
1635 3504
1635 4913
1636 5
1636 94
1636 188
1636 445
1636 775
1636 1209
1636 1305
1636 1804
1636 2630
1636 2671
1636 3139
1636 3634
1636 3914
1636 4401
1637 245
1637 330
1637 737
1637 769
1637 4952
1638 336
1638 344
1638 468
1638 664
1638 742
1638 3450
1638 3547
1639 0
1639 3
1639 246
1639 360
1639 488
1639 557
1639 1027
1639 1657
1639 1786
1639 1836
1639 2063
1639 2168
1639 2268
1639 2767
1639 3210
1639 3976
1639 4159
1639 4329
1639 4968
1640 13
1640 80
1640 160
1640 413
1640 1323
1640 1825
1640 3876
1641 9
1641 96
1641 221
1641 257
1641 363
1641 1178
1641 1329
1641 2269
1641 4099
1642 0
1642 4
1642 20
1642 27
1642 38
1642 210
1642 776
1642 1574
1642 3182
1642 3487
1642 4965
1643 36
1643 1033
1643 2089
1644 16
1644 20
1644 21
1644 286
1644 382
1644 1057
1644 1575
1644 2374
1644 2581
1644 2992
1644 3741
1645 139
1645 307
1645 2459
1646 1
1646 131
1646 134
1646 193
1646 226
1646 258
1646 1346
1646 2241
1646 2362
1646 2432
1646 2456
1646 3707
1646 4177
1647 6
1647 16
1647 18
1647 65
1647 199
1647 280
1647 731
1647 1920
1647 1922
1647 4482
1648 1
1648 155
1648 325
1648 1296
1648 1478
1648 1632
1648 3095
1648 4205
1649 23
1649 88
1650 309
1650 357
1650 660
1650 2251
1650 2402
1650 2495
1650 3514
1650 4187
1650 4944
1651 0
1651 56
1651 91
1651 2094
1651 2181
1651 2268
1651 2756
1651 3947
1652 9
1652 24
1652 30
1652 35
1652 602
1652 647
1652 1245
1652 1300
1652 2675
1652 2818
1652 3137
1652 3282
1652 3383
1652 3604
1652 3742
1652 4000
1652 4051
1652 4409
1653 9
1653 11
1653 17
1653 49
1653 139
1653 143
1653 233
1653 916
1653 1122
1653 1887
1653 2565
1653 2672
1653 3247
1653 3970
1653 4810
1653 4953
1654 1
1654 27
1654 28
1654 52
1654 68
1654 828
1654 848
1654 1888
1654 3086
1655 10
1655 14
1655 24
1655 27
1655 62
1655 114
1655 118
1655 121
1655 313
1655 2412
1655 2420
1655 2864
1655 3743
1655 4038
1655 4494
1656 17
1656 45
1656 73
1656 207
1656 229
1656 286
1656 473
1656 1070
1656 1674
1656 2050
1656 2250
1656 4019
1657 14
1657 51
1657 179
1657 586
1657 872
1657 936
1657 1639
1657 1923
1657 3090
1658 2
1658 8
1658 97
1658 3148
1659 10
1659 104
1659 1264
1659 1373
1659 2515
1659 2653
1659 3201
1659 3840
1659 4118
1660 50
1660 131
1660 185
1660 412
1660 488
1660 691
1660 704
1660 1291
1660 2254
1660 2453
1660 3754
1660 3964
1660 3990
1660 4164
1661 74
1661 110
1661 240
1661 284
1661 430
1661 819
1661 1216
1661 2397
1661 2497
1661 4236
1661 4385
1662 95
1662 142
1662 912
1662 1144
1662 2180
1662 4359
1663 13
1663 19
1663 23
1663 347
1663 438
1663 803
1663 904
1663 2055
1663 2060
1663 2518
1663 3311
1663 3372
1663 3780
1664 1
1664 7
1664 14
1664 22
1664 155
1664 907
1664 1210
1664 1215
1664 2266
1664 2519
1664 3310
1664 3540
1664 3944
1664 4073
1664 4080
1664 4111
1664 4665
1664 4831
1665 2
1665 14
1665 16
1665 56
1665 522
1665 614
1665 633
1665 705
1665 1360
1665 1800
1665 2916
1665 4641
1666 5
1666 8
1666 35
1666 65
1666 135
1666 488
1666 776
1666 1327
1666 1603
1666 2584
1666 3728
1666 4554
1667 8
1667 11
1667 95
1667 416
1667 503
1667 572
1667 1388
1667 1678
1667 2139
1667 2198
1667 4589
1667 4895
1668 13
1668 106
1668 379
1668 498
1668 567
1668 591
1668 711
1668 730
1668 991
1668 2739
1668 2897
1668 3526
1668 3930
1669 769
1669 907
1670 12
1670 182
1670 890
1670 1198
1670 1308
1670 1883
1670 2123
1670 2193
1670 3070
1670 3758
1670 4154
1671 2
1671 837
1671 1101
1671 2338
1672 17
1672 32
1672 60
1672 118
1672 156
1672 342
1672 1958
1672 3311
1672 3992
1672 4996
1673 41
1673 405
1673 717
1673 724
1673 1335
1673 2451
1673 4393
1674 184
1674 225
1674 829
1674 857
1674 1173
1674 1656
1674 1726
1674 2207
1675 0
1675 3
1675 154
1675 514
1675 960
1675 1393
1675 1560
1675 1688
1675 3072
1675 3738
1675 3955
1675 4457
1676 2
1676 1033
1676 1042
1676 2043
1676 2594
1676 3303
1676 3938
1676 4889
1677 7
1677 18
1677 311
1677 490
1677 749
1677 1062
1677 1317
1677 1535
1677 3046
1677 4893
1678 8
1678 151
1678 601
1678 1433
1678 1488
1678 1667
1678 2692
1678 2924
1678 4406
1678 4726
1679 244
1679 379
1679 917
1679 928
1679 1138
1679 2601
1679 4378
1680 709
1680 768
1680 951
1680 2427
1681 0
1681 4
1681 5
1681 77
1681 199
1681 718
1681 761
1681 810
1681 1024
1681 1128
1681 2006
1681 3382
1681 3547
1681 3563
1682 0
1682 21
1682 720
1682 824
1682 1579
1682 1751
1682 2287
1682 2804
1682 3223
1682 4510
1683 1
1683 3
1683 9
1683 155
1683 285
1683 1045
1683 1284
1683 3664
1683 4440
1684 12
1684 64
1684 97
1684 289
1684 1018
1684 1328
1684 1620
1684 3259
1684 3627
1685 136
1685 251
1685 259
1685 347
1685 498
1685 1211
1685 1635
1685 2629
1685 3536
1685 3986
1685 4031
1685 4739
1686 289
1687 66
1687 194
1687 753
1687 1484
1687 1748
1687 1863
1687 1942
1687 2436
1687 2512
1687 2523
1687 3738
1687 3882
1688 643
1688 1122
1688 1675
1689 3
1689 7
1689 167
1689 475
1689 495
1689 725
1689 1482
1689 1694
1689 2754
1689 2803
1689 4414
1689 4850
1690 5
1690 9
1690 27
1690 244
1690 382
1690 487
1690 1091
1690 1515
1690 2470
1690 3295
1690 3421
1690 3640
1690 4500
1691 88
1691 104
1691 171
1691 910
1691 2268
1691 2619
1691 2955
1691 3253
1691 3316
1691 4604
1692 5
1692 9
1692 69
1692 86
1692 498
1692 2136
1692 2410
1693 64
1693 458
1693 648
1693 877
1693 1033
1693 1083
1693 1185
1693 1418
1693 2292
1693 2877
1693 3061
1693 3116
1693 3229
1693 3555
1694 52
1694 428
1694 1689
1695 179
1695 262
1696 4
1696 14
1696 58
1696 63
1696 150
1696 380
1696 3090
1696 3422
1696 3861
1696 4326
1697 12
1697 269
1697 309
1697 597
1697 947
1697 1112
1697 1741
1697 1834
1697 3474
1697 3720
1698 1
1698 8
1698 16
1698 246
1698 447
1699 300
1699 679
1699 846
1700 63
1700 334
1700 1040
1700 1163
1700 1245
1700 1979
1700 1989
1700 2504
1700 3525
1700 4211
1701 3
1701 12
1701 243
1701 441
1701 898
1701 903
1701 1006
1701 2169
1701 2799
1701 4174
1701 4896
1702 10
1702 338
1702 629
1702 1706
1702 4107
1703 2
1703 10
1703 53
1703 96
1703 176
1703 572
1703 4467
1704 4
1704 21
1704 40
1704 621
1704 679
1704 1597
1704 2704
1704 2848
1704 3278
1704 4710
1705 1233
1706 5
1706 121
1706 224
1706 516
1706 1702
1706 2661
1706 2961
1706 4628
1707 43
1707 4973
1708 3
1708 35
1708 783
1708 954
1708 998
1708 1088
1708 1115
1708 1314
1708 1587
1708 2600
1708 4283
1708 4961
1709 14
1709 35
1709 70
1709 294
1709 668
1709 2472
1709 2758
1709 3223
1709 3864
1710 0
1710 5
1710 192
1710 354
1710 830
1710 882
1710 1915
1710 2253
1710 2508
1711 17
1711 204
1711 337
1711 353
1711 1423
1711 1551
1711 3255
1711 3840
1711 3866
1711 4349
1712 8
1712 10
1712 50
1712 78
1712 333
1712 464
1712 505
1712 738
1712 1985
1712 2355
1712 3567
1712 4342
1713 19
1713 603
1713 607
1713 782
1713 862
1713 1746
1713 1841
1713 2180
1713 2282
1713 3632
1713 3827
1714 12
1714 226
1714 265
1714 656
1714 731
1714 2577
1714 2829
1714 3011
1715 5
1715 6
1715 12
1715 170
1715 602
1715 958
1715 1126
1715 1326
1715 2515
1715 2623
1715 2761
1715 3203
1715 3342
1716 170
1716 194
1716 362
1716 464
1716 755
1716 795
1716 1346
1716 2113
1716 3207
1716 4187
1716 4460
1717 5
1717 10
1717 16
1717 24
1717 40
1717 48
1717 184
1717 591
1717 709
1717 2079
1717 2259
1717 2439
1717 2693
1717 3269
1717 3303
1717 3537
1717 4463
1718 43
1718 370
1718 568
1718 788
1718 1075
1718 1318
1718 1572
1718 3003
1719 14
1719 150
1719 179
1719 299
1719 1441
1719 3357
1720 11
1720 225
1720 583
1720 657
1720 1211
1720 2475
1720 2491
1721 12
1721 17
1721 27
1721 43
1721 677
1721 3137
1721 3483
1722 4
1722 9
1722 133
1722 148
1722 163
1722 324
1722 570
1722 639
1722 646
1722 1313
1722 1420
1722 1478
1722 1862
1722 1930
1722 1968
1722 2009
1722 2145
1722 2184
1722 2300
1722 3010
1722 4962
1723 299
1723 325
1723 841
1723 2241
1723 4804
1723 4935
1723 4960
1724 22
1724 78
1724 209
1724 701
1724 1120
1724 1254
1724 1581
1724 2625
1724 2760
1724 4298
1724 4802
1725 5
1725 70
1725 150
1725 421
1725 498
1725 1281
1725 1478
1725 2898
1725 3177
1725 4801
1726 106
1726 456
1726 984
1726 1268
1726 1674
1726 2300
1726 3782
1726 3996
1726 4518
1727 20
1727 54
1727 95
1727 198
1727 382
1727 567
1727 828
1727 1186
1727 2264
1727 3094
1727 3408
1727 3510
1727 4532
1727 4864
1728 203
1728 482
1728 1866
1728 2938
1728 3163
1729 9
1729 42
1729 66
1729 119
1729 164
1729 798
1729 1127
1729 1389
1729 2454
1729 4441
1730 12
1730 199
1730 242
1730 525
1730 885
1730 1984
1731 12
1731 142
1731 225
1731 1909
1731 2372
1731 3080
1731 4098
1731 4472
1732 3
1732 21
1732 78
1732 972
1732 1087
1732 1173
1732 1875
1732 3679
1732 3884
1733 22
1733 64
1733 212
1733 842
1733 1612
1733 3325
1733 4804
1734 23
1734 202
1734 241
1734 658
1734 1073
1734 1235
1734 2591
1734 2980
1734 3373
1734 3849
1734 3950
1734 4253
1734 4336
1735 9
1735 49
1735 104
1735 682
1735 746
1735 816
1735 1242
1735 4007
1736 87
1736 93
1736 107
1736 167
1736 265
1736 765
1736 1323
1736 1833
1736 2996
1736 3232
1736 3407
1736 4571
1736 4600
1737 5
1737 218
1737 3256
1737 3833
1737 4105
1738 61
1738 64
1738 148
1738 154
1738 555
1738 724
1738 1026
1738 1353
1738 1745
1738 2001
1738 2943
1739 5
1739 22
1739 204
1739 847
1739 3432
1739 3628
1739 4198
1740 11
1740 17
1740 19
1740 161
1740 230
1740 440
1740 890
1740 1006
1740 1065
1740 1413
1740 3153
1740 3813
1740 4354
1741 14
1741 124
1741 824
1741 936
1741 1697
1741 2328
1741 3212
1742 3
1742 21
1742 93
1742 509
1742 624
1742 684
1742 2087
1743 17
1743 144
1743 309
1743 333
1743 427
1743 506
1743 909
1743 1314
1743 1754
1743 2303
1743 2506
1743 3347
1743 4111
1743 4651
1744 7
1744 64
1744 202
1744 265
1744 791
1744 1481
1744 1796
1744 2009
1744 2840
1744 4091
1744 4392
1744 4809
1745 0
1745 106
1745 424
1745 853
1745 1493
1745 1738
1745 2496
1745 2835
1745 3036
1745 3473
1745 4177
1745 4643
1746 10
1746 19
1746 1148
1746 1538
1746 1713
1746 1892
1746 2076
1747 15
1747 67
1747 128
1747 1076
1748 7
1748 38
1748 227
1748 337
1748 1555
1748 1687
1748 2014
1749 23
1749 37
1749 71
1749 150
1749 187
1749 610
1749 876
1749 907
1749 1304
1749 2271
1749 3190
1749 4227
1750 840
1751 16
1751 44
1751 505
1751 530
1751 726
1751 931
1751 1682
1751 2253
1751 2631
1752 10
1752 13
1752 268
1752 380
1752 486
1752 604
1752 613
1752 1014
1752 2700
1752 2785
1752 2825
1752 3189
1752 3468
1752 4488
1753 12
1753 18
1753 107
1753 2641
1753 4019
1753 4050
1754 693
1754 778
1754 807
1754 839
1754 1743
1754 3539
1755 13
1755 24
1755 112
1755 337
1755 2874
1755 3357
1756 4
1756 7
1756 9
1756 10
1756 12
1756 17
1756 378
1756 392
1756 436
1756 1095
1756 2008
1756 2594
1756 2731
1756 2752
1756 3597
1756 3653
1757 104
1757 439
1757 522
1757 641
1757 693
1757 717
1757 795
1757 974
1757 2151
1757 2374
1757 2594
1757 2985
1757 3209
1757 4412
1758 20
1758 58
1758 273
1758 411
1758 685
1758 951
1758 967
1758 1169
1758 2576
1758 4726
1759 313
1759 490
1759 566
1759 2772
1760 423
1760 433
1760 472
1760 888
1760 1853
1760 1929
1760 3484
1761 6
1761 13
1761 16
1761 24
1761 2380
1761 2463
1762 2
1762 7
1762 70
1762 603
1762 607
1762 823
1762 900
1762 1865
1762 1947
1762 2127
1763 9
1763 249
1763 329
1763 614
1763 763
1763 799
1763 824
1763 1129
1763 3725
1763 3759
1763 3800
1763 4000
1763 4496
1763 4533
1764 7
1764 35
1764 49
1764 150
1764 261
1764 522
1765 62
1765 93
1765 244
1765 363
1765 565
1765 967
1765 2995
1765 3994
1765 4196
1766 16
1766 26
1766 124
1766 354
1766 626
1766 815
1766 2935
1766 4412
1767 116
1767 246
1767 793
1767 833
1767 1189
1767 1521
1767 2382
1767 2965
1767 3066
1767 3137
1767 3488
1767 3589
1768 10
1768 14
1768 251
1768 803
1768 861
1769 67
1769 121
1769 1016
1769 1233
1769 1929
1769 3231
1770 6
1770 10
1770 353
1770 449
1770 562
1770 664
1770 1139
1770 1378
1770 2095
1770 2724
1770 2831
1770 2942
1771 5
1771 11
1771 15
1771 502
1771 571
1771 1159
1771 1836
1771 2595
1771 3815
1771 4991
1772 10
1772 16
1772 31
1772 127
1772 133
1772 988
1772 1831
1772 2971
1773 8
1773 10
1773 356
1773 1110
1773 2480
1773 4649
1774 3
1774 19
1774 194
1774 1057
1774 1173
1774 1219
1774 2177
1774 2374
1774 3096
1774 3397
1774 4672
1775 19
1775 804
1775 2192
1775 3782
1775 4486
1776 2
1776 98
1776 512
1776 627
1777 8
1777 15
1777 27
1777 91
1777 347
1777 570
1777 796
1777 2950
1777 3358
1777 3575
1777 4470
1778 13
1778 30
1778 601
1778 831
1778 997
1778 3887
1778 4052
1779 10
1779 142
1779 292
1779 438
1779 956
1779 3218
1779 3689
1779 3758
1779 4261
1780 85
1780 968
1780 1030
1780 1313
1780 4996
1781 10
1782 10
1782 155
1782 348
1782 971
1782 4010
1782 4568
1783 0
1783 17
1783 30
1783 420
1783 505
1783 799
1783 921
1783 931
1783 1063
1783 2130
1783 2224
1783 2469
1783 3468
1783 3790
1784 2
1784 5
1784 27
1784 63
1784 182
1784 777
1784 2604
1784 4477
1785 14
1785 33
1785 635
1785 3564
1785 4562
1785 4737
1786 1391
1786 1589
1786 1639
1786 3866
1786 4943
1787 3
1787 13
1787 1443
1787 2126
1787 2424
1788 12
1788 26
1788 27
1788 135
1788 236
1788 309
1788 631
1788 1470
1788 2264
1788 2306
1788 2738
1788 2775
1789 38
1789 40
1789 227
1789 257
1789 732
1789 821
1789 941
1789 2239
1789 4262
1790 91
1790 146
1790 651
1790 1864
1790 3116
1791 6
1791 12
1791 13
1791 16
1791 87
1791 460
1791 1884
1791 1988
1791 2400
1792 1361
1792 4757
1793 33
1793 1493
1793 1520
1793 1985
1793 3889
1793 4797
1794 0
1794 14
1794 29
1794 97
1794 330
1794 2015
1794 2129
1794 3048
1794 3251
1794 3951
1794 4535
1794 4947
1795 216
1795 246
1795 566
1795 1096
1795 1434
1795 1924
1795 2343
1796 545
1796 583
1796 597
1796 968
1796 1487
1796 1744
1796 1897
1796 1953
1796 2200
1796 2528
1796 3008
1797 5
1797 64
1797 106
1797 181
1797 207
1797 248
1797 349
1797 1097
1797 1240
1797 2244
1797 3545
1797 3805
1797 4644
1798 20
1798 122
1798 218
1798 350
1798 4028
1798 4221
1799 13
1799 72
1799 138
1799 160
1799 225
1799 230
1799 496
1799 557
1799 575
1799 712
1799 741
1799 1597
1799 1948
1799 3933
1800 2
1800 5
1800 58
1800 204
1800 383
1800 1281
1800 1665
1800 1987
1800 2414
1800 2459
1800 2842
1800 3431
1800 3538
1800 4155
1800 4645
1800 4668
1801 44
1801 53
1801 71
1801 242
1801 1089
1801 1235
1801 2189
1801 2726
1801 2779
1801 2951
1801 3361
1801 3497
1801 4526
1801 4980
1802 3
1802 7
1802 21
1802 29
1802 205
1802 268
1802 533
1802 616
1802 741
1802 2075
1802 2275
1802 3707
1802 4024
1802 4154
1802 4259
1803 55
1803 140
1803 181
1803 292
1803 1262
1803 1418
1803 1616
1803 1920
1803 2338
1803 2437
1803 2640
1803 3212
1803 3657
1803 3733
1804 16
1804 19
1804 59
1804 216
1804 572
1804 651
1804 861
1804 1284
1804 1636
1804 2214
1804 2238
1804 2282
1804 3007
1804 3216
1804 3350
1805 1
1805 5
1805 48
1805 89
1805 679
1805 1546
1806 9
1806 45
1806 75
1806 124
1806 166
1806 195
1806 811
1806 3141
1806 4072
1806 4295
1807 4
1807 6
1807 21
1807 27
1807 44
1807 617
1807 2216
1808 0
1808 67
1808 533
1808 724
1808 3453
1808 4216
1808 4351
1809 641
1809 677
1809 4693
1810 65
1810 138
1810 154
1810 263
1810 333
1810 1340
1810 1553
1810 3283
1810 3986
1810 4678
1811 18
1811 39
1811 110
1812 0
1812 167
1812 233
1812 242
1812 363
1812 541
1812 2029
1812 2156
1812 2414
1812 2613
1812 2889
1812 4681
1813 63
1813 120
1813 218
1813 251
1813 656
1813 2024
1813 2279
1813 2325
1813 2861
1813 4104
1813 4313
1814 0
1814 2
1814 13
1814 121
1814 147
1814 751
1814 1189
1814 1314
1814 2461
1814 2560
1814 3636
1814 4360
1814 4431
1814 4477
1815 16
1815 116
1815 179
1815 196
1815 447
1815 541
1815 668
1815 806
1815 2509
1815 3307
1815 3481
1815 3647
1815 3822
1815 4528
1816 51
1816 134
1816 150
1816 221
1816 439
1816 464
1816 638
1816 891
1816 1458
1816 2871
1817 9
1817 475
1818 10
1818 155
1818 415
1818 467
1818 514
1818 602
1818 609
1818 743
1818 1276
1818 2120
1818 2166
1818 2550
1818 2890
1818 2925
1818 3019
1818 3298
1818 3486
1818 3924
1818 4140
1818 4650
1819 19
1819 225
1819 841
1819 907
1819 1174
1819 1922
1819 2918
1819 3963
1820 85
1820 796
1820 1262
1820 1603
1820 2003
1821 13
1821 84
1821 230
1821 307
1821 665
1821 1449
1821 2813
1821 2888
1821 3167
1821 3197
1821 4921
1821 4994
1822 387
1822 1323
1823 46
1823 54
1823 128
1823 225
1823 410
1823 984
1823 1045
1823 1977
1823 4911
1824 8
1824 17
1824 21
1824 124
1824 133
1824 179
1824 2195
1824 3100
1824 3937
1824 4016
1825 8
1825 248
1825 1289
1825 1640
1825 4421
1827 1
1827 10
1827 517
1827 1891
1827 2052
1827 2857
1827 4138
1828 10
1828 70
1828 208
1828 310
1828 628
1828 722
1828 857
1828 1635
1828 2359
1828 2592
1828 4106
1829 63
1829 265
1829 828
1829 1084
1829 1145
1830 170
1830 264
1830 451
1830 632
1830 840
1830 969
1830 1993
1830 2060
1830 2231
1830 2669
1830 3005
1830 3368
1830 3971
1830 4508
1831 33
1831 349
1831 704
1831 888
1831 932
1831 997
1831 1029
1831 1274
1831 1772
1831 2016
1831 2425
1831 3296
1831 3797
1832 64
1832 260
1832 289
1832 1351
1832 1375
1832 3016
1833 4
1833 32
1833 185
1833 1327
1833 1496
1833 1736
1833 1980
1833 1981
1833 2685
1833 2720
1833 2800
1833 4060
1833 4185
1834 5
1834 8
1834 17
1834 41
1834 59
1834 147
1834 193
1834 343
1834 728
1834 1443
1834 1697
1834 2044
1834 2237
1834 3249
1835 15
1835 22
1835 326
1835 850
1835 1237
1835 2316
1835 2704
1835 2863
1835 2882
1835 3186
1835 4317
1836 5
1836 12
1836 286
1836 1044
1836 1639
1836 1771
1836 3179
1836 3721
1836 4035
1837 0
1837 3
1837 18
1837 21
1837 91
1837 441
1837 474
1837 480
1837 860
1837 1129
1837 1550
1837 1981
1837 2678
1837 3304
1837 3327
1837 3566
1837 3608
1837 4743
1837 4862
1838 2
1838 15
1838 79
1838 260
1838 378
1838 777
1838 1199
1838 2007
1838 3361
1838 4087
1839 279
1840 2
1840 488
1840 507
1840 622
1840 1075
1840 2320
1840 4239
1841 3
1841 63
1841 1218
1841 1248
1841 1713
1841 3159
1841 3234
1841 3515
1842 5
1842 1234
1842 1253
1842 1526
1842 3640
1842 4066
1842 4872
1843 18
1843 38
1843 725
1843 985
1843 1052
1843 1065
1843 1281
1843 1621
1843 2206
1843 2768
1843 3442
1843 3645
1843 3752
1843 4743
1844 17
1844 420
1844 1564
1844 1935
1845 14
1845 226
1845 424
1845 668
1845 2568
1845 2949
1845 3022
1846 22
1846 36
1846 54
1846 116
1846 335
1846 366
1846 3535
1846 3808
1847 14
1847 289
1847 624
1847 1296
1847 1900
1847 1961
1847 2306
1848 6
1848 196
1848 279
1848 325
1848 537
1848 805
1849 13
1849 138
1849 490
1849 3044
1850 1
1850 7
1850 16
1850 18
1850 91
1850 1610
1850 4032
1851 285
1851 307
1851 341
1852 11
1852 326
1852 637
1852 647
1852 854
1852 2378
1852 4239
1853 10
1853 268
1853 312
1853 467
1853 1081
1853 1760
1853 2405
1853 2409
1853 3454
1854 73
1854 994
1854 1406
1854 2369
1854 3064
1854 3151
1854 4502
1854 4915
1855 13
1855 41
1855 96
1855 116
1855 1070
1855 1192
1855 1631
1855 3331
1856 0
1856 3
1856 7
1856 21
1856 25
1856 794
1856 2531
1856 2669
1856 4345
1856 4600
1857 17
1857 62
1857 94
1857 143
1857 469
1857 1378
1857 3856
1857 4495
1858 4
1858 52
1858 281
1858 420
1858 622
1858 1135
1858 2066
1858 3381
1858 3715
1858 4013
1859 10
1859 372
1859 482
1859 519
1859 915
1859 1294
1859 1359
1859 1523
1859 2023
1859 2267
1859 2590
1859 2726
1859 2757
1859 3471
1859 3821
1859 4342
1859 4557
1859 4816
1860 0
1860 1
1860 93
1860 342
1860 1478
1860 2524
1861 16
1861 48
1861 127
1861 894
1861 1061
1861 1263
1861 1628
1861 2353
1861 2866
1861 3027
1861 4983
1862 4
1862 6
1862 809
1862 1722
1862 2330
1862 4465
1863 11
1863 76
1863 125
1863 1019
1863 1319
1863 1687
1863 2236
1863 3168
1864 6
1864 176
1864 616
1864 1234
1864 1790
1865 9
1865 54
1865 181
1865 945
1865 1762
1865 2124
1865 2659
1865 3713
1866 179
1866 215
1866 374
1866 555
1866 982
1866 1728
1866 2861
1866 3366
1866 3867
1866 4128
1867 2
1867 7
1867 14
1867 323
1867 369
1867 682
1867 685
1867 1925
1867 2403
1867 3241
1867 3444
1867 3736
1867 4062
1867 4487
1868 583
1869 94
1869 405
1869 791
1869 1152
1869 1259
1869 2300
1869 2718
1869 3086
1870 4
1870 124
1870 273
1870 2603
1870 3255
1870 4832
1871 1
1871 16
1871 93
1871 119
1871 640
1871 1122
1871 3847
1871 3890
1871 3927
1872 104
1872 302
1872 343
1872 344
1872 676
1872 1429
1872 1941
1872 1949
1872 2551
1872 4092
1873 0
1873 23
1873 28
1873 60
1873 462
1874 12
1874 17
1874 632
1874 840
1874 1023
1874 1340
1874 3384
1874 3532
1874 3685
1874 4177
1874 4758
1875 0
1875 12
1875 17
1875 186
1875 298
1875 407
1875 1062
1875 1732
1875 1876
1875 2011
1875 2486
1875 3014
1875 4095
1876 5
1876 11
1876 31
1876 72
1876 88
1876 244
1876 569
1876 1216
1876 1875
1876 2591
1876 2817
1876 3064
1876 3558
1876 4517
1876 4844
1877 56
1877 131
1877 669
1877 685
1877 2732
1877 3805
1878 4
1878 8
1878 12
1878 399
1878 577
1878 624
1878 679
1878 802
1878 947
1878 1351
1878 1628
1878 2364
1878 2582
1878 4045
1878 4131
1878 4296
1878 4310
1878 4513
1879 208
1879 681
1879 811
1880 30
1880 38
1880 46
1880 86
1880 535
1880 763
1880 943
1880 968
1880 2062
1880 2832
1881 10
1881 17
1881 211
1881 380
1881 514
1881 907
1881 1280
1881 2168
1881 2206
1881 2772
1881 3860
1881 4560
1881 4894
1882 0
1882 8
1882 38
1882 324
1882 959
1882 2438
1882 3769
1882 4193
1883 23
1883 92
1883 168
1883 229
1883 243
1883 803
1883 804
1883 981
1883 1140
1883 1670
1883 2267
1883 2585
1883 2641
1883 2937
1883 3707
1883 3811
1883 4547
1883 4631
1883 4824
1884 591
1884 816
1884 1791
1884 3109
1884 4072
1884 4227
1884 4267
1884 4847
1884 4865
1885 16
1885 18
1885 52
1885 202
1885 511
1885 1239
1885 1335
1885 2294
1885 2577
1885 3023
1885 3253
1886 21
1886 54
1886 77
1886 233
1886 591
1886 688
1886 1973
1886 3399
1886 4560
1887 8
1887 90
1887 796
1887 1270
1887 1653
1887 2255
1887 2344
1887 2397
1887 2399
1887 3070
1887 3610
1888 10
1888 13
1888 14
1888 27
1888 77
1888 184
1888 567
1888 826
1888 1063
1888 1190
1888 1390
1888 1654
1888 2484
1888 3754
1888 4520
1888 4613
1888 4678
1888 4987
1889 85
1889 109
1889 454
1889 1594
1889 1613
1889 1622
1889 2230
1889 2509
1890 62
1890 68
1890 274
1890 575
1890 1029
1890 1317
1890 2455
1890 3723
1890 4275
1891 17
1891 42
1891 150
1891 666
1891 1827
1891 4332
1892 15
1892 164
1892 267
1892 541
1892 1234
1892 1746
1892 2195
1892 3845
1893 17
1893 50
1893 594
1893 831
1893 1004
1893 1101
1893 1360
1893 1635
1893 1922
1893 2028
1893 2443
1893 3068
1893 3165
1893 3503
1893 4616
1894 9
1894 19
1894 147
1894 160
1894 294
1894 419
1894 942
1894 1965
1894 2113
1894 3090
1894 3095
1894 3134
1894 3278
1894 3328
1894 3837
1894 4029
1894 4037
1894 4393
1894 4879
1895 84
1895 108
1895 766
1895 1210
1895 1340
1895 2719
1895 2779
1896 551
1896 689
1896 4273
1897 5
1897 10
1897 70
1897 79
1897 152
1897 769
1897 1131
1897 1256
1897 1521
1897 1796
1897 2098
1897 2834
1897 2910
1897 3176
1897 3487
1898 73
1898 105
1898 391
1898 749
1898 1003
1898 4303
1899 44
1899 132
1899 644
1899 1554
1899 2306
1899 2556
1899 2681
1899 2929
1899 3836
1900 4
1900 155
1900 337
1900 1847
1900 2267
1900 3222
1900 3689
1900 3714
1900 4077
1900 4438
1901 4
1901 23
1901 30
1901 610
1902 8
1902 14
1902 207
1902 208
1902 508
1902 579
1902 2167
1902 2375
1902 2451
1902 2485
1902 2695
1902 2928
1902 2953
1902 3962
1903 18
1903 25
1903 293
1903 498
1903 684
1903 868
1903 1072
1903 2246
1903 2592
1903 3137
1903 3956
1903 4285
1903 4746
1903 4755
1903 4789
1904 31
1904 146
1904 174
1904 623
1904 883
1904 1362
1904 2505
1904 2727
1904 3687
1905 17
1905 22
1905 124
1905 149
1906 7
1906 11
1906 306
1906 4024
1907 485
1907 727
1907 1304
1907 2277
1908 25
1908 153
1908 281
1908 409
1908 467
1908 1956
1908 4427
1908 4671
1908 4753
1909 14
1909 354
1909 1543
1909 1731
1909 4077
1910 2
1910 14
1910 262
1910 444
1910 798
1910 1326
1910 2331
1910 3034
1910 4758
1911 16
1911 17
1911 26
1911 305
1911 980
1911 2749
1911 4893
1912 88
1912 275
1912 645
1912 1183
1912 1333
1912 2461
1912 3557
1913 22
1913 62
1913 122
1913 362
1913 369
1913 637
1913 1569
1913 2713
1913 2750
1913 3399
1913 3572
1913 4015
1913 4174
1913 4484
1914 166
1914 233
1914 1604
1915 33
1915 382
1915 554
1915 1508
1915 1710
1915 3362
1915 4173
1915 4191
1916 4
1916 286
1916 333
1916 828
1916 1144
1916 1235
1916 1340
1916 1521
1916 1993
1916 3396
1916 3472
1916 3662
1916 3960
1916 4003
1916 4447
1916 4895
1917 6
1917 35
1917 76
1917 181
1917 282
1917 778
1917 928
1917 2374
1918 16
1918 38
1918 199
1918 380
1918 1516
1919 0
1919 54
1919 401
1919 569
1919 1131
1919 1405
1919 1633
1919 3028
1920 22
1920 35
1920 86
1920 127
1920 248
1920 1647
1920 1803
1920 2401
1920 2846
1920 2866
1920 3145
1920 4290
1920 4334
1920 4924
1921 170
1921 840
1921 951
1921 1462
1921 1506
1921 2970
1922 0
1922 3
1922 278
1922 457
1922 520
1922 646
1922 1626
1922 1647
1922 1819
1922 1893
1922 2040
1922 2287
1922 2393
1922 2743
1922 3329
1922 3415
1922 3465
1922 3795
1922 3963
1922 4218
1922 4424
1922 4468
1922 4544
1922 4984
1923 0
1923 7
1923 851
1923 1068
1923 1299
1923 1361
1923 1657
1923 1924
1923 2295
1923 3851
1923 4326
1923 4821
1924 21
1924 73
1924 264
1924 960
1924 1795
1924 1923
1925 0
1925 187
1925 196
1925 1000
1925 1396
1925 1461
1925 1867
1925 2206
1925 2702
1925 3393
1926 159
1926 544
1926 784
1926 847
1926 859
1926 3357
1926 4257
1927 2
1927 69
1927 604
1927 787
1927 1006
1927 1213
1927 1954
1927 3627
1927 4093
1928 0
1928 11
1928 164
1928 476
1928 479
1928 2705
1928 3960
1928 4040
1928 4084
1929 2
1929 712
1929 1760
1929 1769
1930 21
1930 201
1930 1340
1930 1476
1930 1722
1930 2222
1930 2351
1930 3074
1930 3416
1930 3866
1930 4593
1930 4623
1930 4683
1931 2
1931 8
1931 81
1931 347
1931 473
1931 746
1931 2970
1931 3633
1931 4573
1932 7
1932 570
1933 4
1933 53
1933 196
1933 302
1933 381
1933 532
1933 2066
1933 2239
1933 2867
1933 3826
1933 4798
1934 6
1934 12
1934 140
1935 4
1935 6
1935 32
1935 715
1935 813
1935 1039
1935 1844
1935 3704
1935 4305
1936 19
1936 43
1936 147
1936 262
1936 524
1936 1435
1936 3086
1936 3347
1936 3464
1936 4484
1937 29
1937 258
1937 478
1938 60
1938 1317
1938 2065
1938 2407
1938 4347
1939 8
1939 350
1939 1458
1939 1477
1939 2456
1939 3855
1940 8
1940 204
1941 4
1941 38
1941 88
1941 209
1941 394
1941 1378
1941 1872
1941 2619
1941 2652
1941 4424
1942 17
1942 179
1942 578
1942 1234
1942 1687
1942 2421
1942 2993
1943 41
1943 60
1943 125
1943 458
1943 534
1943 584
1943 1321
1943 2464
1943 4640
1944 148
1944 221
1944 605
1944 791
1944 1571
1945 3
1945 9
1945 21
1945 112
1945 354
1945 432
1945 464
1945 852
1945 883
1945 2150
1945 2696
1945 3020
1945 3791
1946 56
1946 773
1946 782
1946 2080
1946 2770
1946 4496
1947 14
1947 148
1947 286
1947 349
1947 672
1947 861
1947 1514
1947 1762
1947 2099
1947 2869
1947 2884
1948 562
1948 674
1948 1376
1948 1799
1948 2083
1948 2159
1948 2955
1948 4469
1948 4738
1949 212
1949 293
1949 820
1949 1872
1949 2756
1949 4918
1950 1
1950 14
1950 45
1950 205
1950 311
1950 446
1950 2248
1950 3650
1951 160
1951 163
1951 280
1951 670
1951 979
1951 1014
1951 1077
1951 2367
1951 2898
1951 3001
1951 3267
1951 3997
1951 4085
1951 4488
1952 126
1952 516
1952 701
1952 2639
1952 3777
1953 12
1953 13
1953 45
1953 66
1953 771
1953 954
1953 1796
1953 4004
1953 4097
1953 4597
1953 4626
1953 4892
1954 5
1954 40
1954 345
1954 533
1954 904
1954 1435
1954 1541
1954 1927
1954 2115
1954 2696
1954 2803
1954 3606
1954 4420
1954 4895
1954 4968
1955 19
1955 21
1955 39
1956 123
1956 1298
1956 1365
1956 1389
1956 1908
1956 3361
1956 3463
1956 4011
1956 4314
1957 3
1957 4
1957 78
1957 487
1957 503
1957 1505
1957 2076
1957 2335
1957 2606
1957 2624
1957 3419
1958 189
1958 661
1958 688
1958 1672
1959 10
1959 17
1959 414
1959 497
1959 2191
1959 2489
1959 2850
1959 3021
1959 3156
1959 3275
1959 3449
1959 3663
1959 3809
1960 0
1960 1
1960 14
1960 564
1960 611
1960 1171
1960 1405
1960 3005
1960 4081
1961 117
1961 703
1961 811
1961 1847
1961 2630
1961 3212
1961 3368
1961 3672
1961 4401
1961 4506
1962 4
1962 6
1962 96
1962 110
1962 440
1962 520
1962 1035
1962 1253
1962 2943
1962 2964
1962 3781
1963 7
1963 40
1963 143
1963 224
1963 298
1963 880
1963 1323
1963 1440
1963 1581
1963 2056
1963 3727
1963 4275
1963 4450
1963 4597
1963 4837
1964 54
1964 971
1965 0
1965 119
1965 461
1965 1178
1965 1894
1965 2798
1965 3089
1966 4
1966 8
1966 35
1966 49
1966 62
1966 308
1966 637
1966 2265
1966 3304
1966 3384
1966 3702
1967 0
1967 19
1967 118
1967 555
1967 3776
1968 0
1968 1
1968 108
1968 564
1968 785
1968 1722
1968 2283
1968 3449
1968 3825
1968 4129
1969 11
1969 158
1969 343
1969 538
1969 604
1969 806
1969 1242
1969 2856
1969 4892
1970 5
1970 8
1970 114
1970 226
1970 477
1970 1178
1970 2313
1970 4662
1970 4969
1971 749
1971 796
1971 1044
1971 3701
1972 35
1972 123
1972 199
1972 232
1972 441
1972 897
1972 1020
1972 1482
1972 2139
1972 2218
1972 2458
1972 2822
1973 648
1973 985
1973 1420
1973 1886
1973 2926
1974 0
1974 10
1974 632
1974 2617
1975 6
1975 10
1975 15
1975 47
1975 84
1975 3672
1976 16
1976 19
1976 151
1976 170
1976 197
1976 230
1976 343
1976 1578
1976 2466
1976 2534
1976 2737
1976 3523
1976 3632
1976 4722
1976 4876
1977 0
1977 2
1977 576
1977 930
1977 1040
1977 1305
1977 1823
1977 1996
1977 2995
1978 6
1978 56
1978 165
1978 264
1978 998
1978 1049
1978 1992
1978 2045
1978 2372
1978 3263
1978 4313
1979 0
1979 19
1979 32
1979 207
1979 832
1979 1061
1979 1700
1979 2274
1979 2359
1979 2583
1979 4966
1980 0
1980 40
1980 73
1980 325
1980 1833
1980 4654
1981 80
1981 150
1981 369
1981 968
1981 1833
1981 1837
1981 4953
1982 102
1982 330
1982 428
1982 852
1982 1994
1983 8
1983 98
1983 131
1983 200
1983 335
1983 1379
1983 1586
1983 3396
1984 3
1984 252
1984 392
1984 1039
1984 1327
1984 1730
1984 2233
1984 2880
1984 3305
1984 4518
1985 1
1985 230
1985 320
1985 942
1985 1302
1985 1712
1985 1793
1985 3199
1985 3510
1985 4562
1986 17
1986 18
1986 60
1986 590
1986 1062
1986 4241
1987 17
1987 55
1987 251
1987 1414
1987 1800
1987 2155
1987 2933
1987 3058
1987 3673
1987 3934
1987 4237
1988 30
1988 337
1988 429
1988 811
1988 1791
1988 3797
1988 3946
1988 4215
1988 4622
1989 1
1989 741
1989 1216
1989 1700
1989 2407
1989 2479
1989 3685
1989 4166
1990 50
1990 166
1991 12
1991 35
1991 364
1991 459
1991 848
1991 2548
1991 2593
1991 2725
1991 3391
1991 3747
1991 3931
1992 1
1992 16
1992 316
1992 1978
1993 85
1993 248
1993 344
1993 1830
1993 1916
1993 2002
1993 2592
1993 3206
1993 3436
1993 4484
1993 4705
1993 4715
1994 3
1994 9
1994 39
1994 48
1994 91
1994 1185
1994 1982
1994 2541
1994 2596
1994 2866
1994 3317
1994 4391
1995 7
1995 379
1995 948
1995 1129
1995 1333
1995 1485
1995 4369
1996 9
1996 14
1996 23
1996 86
1996 661
1996 1442
1996 1977
1996 3579
1997 0
1997 32
1997 53
1997 122
1997 126
1997 257
1997 350
1997 409
1997 2238
1997 2849
1997 3167
1997 3892
1997 4483
1998 5
1998 12
1998 24
1998 233
1998 364
1998 719
1998 1290
1998 1586
1998 2493
1998 2800
1998 4151
1999 0
1999 7
1999 415
1999 623
1999 2733
1999 4558
2000 6
2000 134
2000 196
2000 988
2000 2180
2000 2664
2000 2934
2000 3030
2000 3252
2000 3276
2000 4102
2001 47
2001 385
2001 410
2001 719
2001 1340
2001 1738
2001 2005
2001 2046
2001 2497
2001 2672
2001 2848
2001 3408
2001 3521
2001 3803
2001 4208
2001 4450
2001 4642
2002 35
2002 630
2002 640
2002 811
2002 1993
2002 2711
2002 3025
2002 3070
2003 12
2003 53
2003 148
2003 319
2003 843
2003 944
2003 1242
2003 1820
2003 2177
2004 17
2004 54
2004 528
2004 544
2005 8
2005 42
2005 62
2005 82
2005 440
2005 940
2005 1234
2005 2001
2005 2735
2005 3474
2005 3945
2005 4333
2006 67
2006 512
2006 1681
2006 2668
2007 5
2007 7
2007 26
2007 329
2007 1838
2007 2615
2007 3059
2007 4170
2008 103
2008 257
2008 420
2008 644
2008 724
2008 1581
2008 1756
2008 2810
2008 4089
2009 8
2009 110
2009 1722
2009 1744
2009 3802
2010 338
2010 643
2010 991
2010 1107
2010 1622
2010 2202
2010 4505
2010 4893
2011 11
2011 44
2011 63
2011 65
2011 490
2011 1354
2011 1422
2011 1875
2012 2
2012 7
2012 307
2012 336
2012 2151
2012 2551
2012 3873
2013 12
2013 16
2013 19
2013 64
2013 179
2013 1056
2013 1218
2013 2249
2013 4052
2013 4588
2014 17
2014 285
2014 556
2014 1044
2014 1150
2014 1748
2014 2189
2014 3510
2014 4105
2015 22
2015 83
2015 96
2015 118
2015 128
2015 1794
2015 2757
2015 4096
2015 4490
2016 0
2016 85
2016 171
2016 198
2016 543
2016 1030
2016 1831
2016 2443
2016 3034
2017 2
2017 93
2017 230
2017 316
2017 479
2017 636
2018 17
2018 19
2018 462
2018 485
2018 595
2018 615
2018 743
2018 1561
2018 2159
2018 2521
2019 19
2019 38
2019 143
2019 167
2019 362
2019 879
2019 1151
2019 2637
2019 2671
2019 2963
2019 3121
2019 4491
2020 2
2020 33
2020 62
2020 667
2020 1427
2020 2896
2020 3536
2020 4709
2021 34
2021 51
2021 69
2021 401
2021 2268
2021 2447
2021 2962
2021 3387
2021 3840
2021 3952
2021 4716
2022 60
2022 202
2022 218
2022 335
2022 365
2022 526
2022 1451
2022 2331
2022 3006
2022 3103
2022 3600
2022 4799
2023 7
2023 15
2023 27
2023 1054
2023 1859
2023 2563
2023 2972
2023 4235
2023 4831
2024 156
2024 186
2024 259
2024 788
2024 1813
2024 2293
2024 3708
2025 44
2025 264
2025 595
2025 1626
2025 2830
2026 71
2026 945
2026 3121
2027 405
2027 524
2027 754
2027 763
2027 2293
2027 3321
2028 36
2028 156
2028 679
2028 828
2028 1234
2028 1893
2028 3550
2029 10
2029 11
2029 47
2029 67
2029 1475
2029 1812
2030 72
2030 74
2030 823
2030 863
2030 1052
2030 1381
2030 1543
2030 2204
2030 3378
2030 3507
2030 3548
2030 4048
2031 123
2031 169
2031 345
2031 415
2032 110
2032 139
2032 741
2032 892
2032 1190
2032 4261
2033 4
2033 11
2033 56
2033 161
2033 1612
2033 3754
2033 3787
2033 4166
2034 1
2034 7
2034 40
2034 106
2034 197
2034 837
2034 2821
2034 3982
2034 4205
2035 35
2035 62
2035 321
2035 397
2035 1201
2035 1230
2035 1243
2035 2124
2035 2438
2035 3639
2035 4242
2036 44
2036 58
2037 4
2037 309
2037 481
2037 908
2037 1463
2037 1578
2037 4443
2038 5
2038 60
2038 66
2038 130
2038 418
2038 782
2038 1060
2038 1209
2038 1249
2038 2060
2038 2393
2038 4303
2039 8
2039 13
2039 14
2039 39
2039 94
2039 101
2039 335
2039 679
2039 1078
2039 2166
2039 3029
2039 3785
2039 4588
2040 24
2040 44
2040 147
2040 266
2040 392
2040 583
2040 1038
2040 1922
2040 3008
2040 3340
2040 4953
2041 141
2041 156
2041 1120
2041 1591
2041 2690
2041 3285
2041 3549
2041 3939
2042 2
2042 5
2042 25
2042 78
2042 176
2042 188
2042 978
2042 2695
2042 4153
2042 4339
2043 7
2043 91
2043 662
2043 1676
2044 1
2044 76
2044 135
2044 210
2044 260
2044 1834
2044 3029
2044 4530
2045 10
2045 59
2045 215
2045 296
2045 440
2045 1073
2045 1978
2045 2743
2046 229
2046 285
2046 1441
2046 1580
2046 2001
2046 2263
2047 38
2047 414
2047 441
2047 493
2047 734
2047 1563
2047 2741
2047 4550
2048 40
2048 624
2048 1036
2048 2963
2049 16
2049 130
2049 185
2049 287
2049 691
2050 23
2050 153
2050 365
2050 372
2050 464
2050 500
2050 648
2050 1656
2050 2656
2050 4499
2051 174
2051 273
2051 1170
2051 1278
2051 1370
2051 1399
2052 0
2052 5
2052 17
2052 25
2052 35
2052 524
2052 1470
2052 1827
2052 2495
2052 3072
2052 3133
2052 3562
2052 4063
2052 4303
2052 4943
2053 382
2053 383
2053 1225
2053 1367
2053 3844
2053 3983
2053 4881
2054 410
2054 885
2054 1407
2054 2824
2054 4405
2055 525
2055 1663
2055 2353
2056 0
2056 36
2056 500
2056 1963
2056 2392
2056 3616
2056 4172
2057 91
2057 385
2057 704
2058 14
2058 16
2058 17
2058 59
2058 69
2058 135
2058 504
2058 759
2058 1125
2058 2173
2058 2291
2058 2720
2058 2848
2058 3285
2058 3425
2058 3426
2058 3711
2058 3896
2058 4040
2058 4251
2059 0
2059 34
2059 51
2059 171
2059 181
2059 749
2059 1451
2059 2375
2059 2410
2059 2666
2059 3129
2059 3145
2059 4448
2060 7
2060 33
2060 106
2060 207
2060 852
2060 1023
2060 1467
2060 1604
2060 1663
2060 1830
2060 2038
2060 3012
2060 3246
2060 3260
2060 3504
2060 3553
2060 4226
2060 4361
2061 141
2061 668
2061 761
2061 823
2061 2937
2062 42
2062 199
2062 313
2062 831
2062 1223
2062 1581
2062 1880
2062 3393
2062 3548
2062 4345
2062 4348
2063 1
2063 3
2063 16
2063 319
2063 607
2063 1639
2063 2689
2063 2777
2063 4299
2063 4842
2064 124
2064 193
2064 335
2065 14
2065 148
2065 239
2065 784
2065 1320
2065 1938
2065 2263
2065 3389
2066 4
2066 309
2066 433
2066 1480
2066 1858
2066 1933
2066 2568
2066 3629
2067 43
2067 100
2067 181
2067 192
2067 357
2067 664
2067 2389
2068 18
2068 360
2068 449
2068 639
2068 1198
2068 1519
2068 2873
2068 3602
2068 4225
2068 4963
2069 100
2070 11
2070 19
2070 32
2070 349
2070 497
2070 671
2070 3912
2070 4064
2071 38
2071 81
2071 262
2071 464
2071 1312
2071 3541
2072 7
2072 15
2072 138
2072 308
2072 3705
2072 3837
2072 4125
2072 4994
2073 268
2073 293
2073 777
2073 1426
2073 4466
2074 11
2074 84
2074 618
2074 1140
2074 1482
2074 2165
2075 14
2075 15
2075 450
2075 951
2075 1802
2075 2257
2075 2545
2075 3920
2075 4828
2076 19
2076 122
2076 764
2076 819
2076 1013
2076 1746
2076 1957
2076 2179
2076 2199
2076 2212
2077 40
2077 60
2077 312
2077 1148
2078 3
2078 19
2078 164
2078 227
2078 814
2078 2357
2079 472
2079 976
2079 1717
2079 2088
2080 5
2080 202
2080 221
2080 932
2080 1946
2080 2559
2080 3749
2080 3869
2080 4671
2081 3
2081 13
2081 336
2081 585
2081 914
2081 1200
2081 2299
2081 3016
2081 3115
2081 4724
2082 6
2082 95
2082 162
2082 409
2082 1441
2082 2621
2082 3434
2083 6
2083 1047
2083 1948
2084 1
2084 17
2084 27
2084 91
2084 533
2084 1574
2084 3211
2084 3539
2085 1
2085 16
2085 265
2085 653
2085 997
2085 1203
2086 1
2086 16
2086 43
2086 262
2086 885
2086 2418
2086 3013
2086 3707
2086 4657
2087 8
2087 128
2087 257
2087 265
2087 481
2087 641
2087 936
2087 1742
2087 2457
2088 14
2088 16
2088 2079
2089 202
2089 488
2089 997
2089 1374
2089 1492
2089 1643
2089 3758
2089 4411
2090 4
2090 447
2090 464
2090 671
2090 980
2091 0
2091 1
2091 17
2091 64
2091 82
2091 88
2091 3660
2092 4
2092 12
2092 397
2092 615
2092 734
2092 939
2092 2241
2092 2489
2092 3590
2092 3630
2092 4161
2092 4691
2093 3
2093 10
2093 13
2093 824
2093 1490
2093 2132
2093 2691
2093 2932
2093 3507
2093 3921
2094 94
2094 97
2094 230
2094 280
2094 603
2094 1279
2094 1651
2094 2680
2094 4716
2094 4905
2095 5
2095 21
2095 1436
2095 1770
2096 5
2096 14
2096 21
2096 224
2096 335
2096 913
2096 1203
2096 2212
2096 4343
2096 4792
2097 5
2097 27
2097 67
2097 325
2097 609
2097 1443
2097 1475
2097 3463
2098 169
2098 387
2098 422
2098 1897
2098 4210
2098 4323
2098 4702
2099 10
2099 40
2099 56
2099 245
2099 500
2099 692
2099 1947
2099 3368
2099 4254
2099 4563
2100 7
2100 15
2100 57
2100 154
2100 411
2100 1555
2100 2298
2100 2529
2100 3287
2100 3560
2100 3992
2101 16
2101 38
2101 148
2101 576
2101 651
2101 852
2102 14
2102 186
2102 413
2102 1253
2102 1307
2102 3207
2102 4697
2103 12
2103 37
2103 57
2103 62
2103 362
2103 998
2103 1124
2103 2279
2103 3283
2103 3365
2103 3900
2104 3
2104 15
2104 66
2104 67
2104 564
2104 692
2104 2141
2104 2373
2105 1
2105 13
2105 139
2105 221
2105 303
2105 360
2105 1085
2105 2783
2105 2963
2105 3721
2105 4486
2106 2
2106 17
2106 1044
2106 1432
2106 3080
2106 3649
2107 36
2107 56
2107 226
2107 360
2107 1388
2107 2751
2107 2857
2107 3925
2107 3981
2108 731
2108 770
2109 4
2109 105
2109 190
2109 233
2109 733
2109 997
2109 3024
2109 3059
2109 3334
2109 3508
2109 3785
2109 3893
2110 6
2110 220
2110 344
2110 1140
2110 1248
2110 2535
2111 382
2111 447
2111 4037
2111 4601
2111 4966
2112 25
2112 442
2112 449
2112 782
2112 962
2112 1042
2112 1262
2112 2593
2112 2675
2112 2716
2112 3767
2113 50
2113 194
2113 796
2113 1104
2113 1405
2113 1604
2113 1716
2113 1894
2113 3815
2113 4129
2114 71
2114 90
2114 410
2114 731
2114 820
2114 1485
2114 3836
2114 3994
2115 1140
2115 1954
2115 2531
2115 2584
2116 64
2116 157
2116 353
2116 475
2116 568
2116 978
2116 4043
2117 6
2117 283
2117 530
2118 11
2118 377
2118 1233
2118 1447
2118 2272
2118 2481
2118 4124
2119 35
2119 41
2119 88
2119 309
2119 3580
2120 152
2120 185
2120 203
2120 533
2120 1064
2120 1264
2120 1818
2120 2898
2121 14
2121 42
2121 429
2121 1404
2122 4
2122 111
2122 1072
2122 2813
2122 3662
2123 10
2123 17
2123 95
2123 306
2123 794
2123 847
2123 1670
2123 2181
2123 2670
2123 2964
2124 59
2124 196
2124 342
2124 1865
2124 2035
2124 2160
2125 15
2125 867
2125 2733
2126 9
2126 310
2126 933
2126 1787
2127 13
2127 369
2127 429
2127 490
2127 569
2127 1762
2127 3507
2127 3822
2128 8
2128 29
2128 111
2128 285
2128 389
2128 632
2128 634
2128 1169
2128 1577
2128 2205
2128 2658
2128 3239
2128 3449
2128 4581
2128 4935
2129 14
2129 159
2129 536
2129 1794
2129 2257
2129 2320
2129 3306
2129 3812
2130 17
2130 124
2130 184
2130 873
2130 1783
2130 2501
2130 2505
2131 35
2131 701
2131 1197
2131 4220
2132 12
2132 82
2132 105
2132 196
2132 319
2132 495
2132 2093
2132 2987
2132 3762
2132 3949
2133 13
2133 85
2133 154
2133 638
2133 867
2133 4328
2134 38
2134 604
2134 638
2134 1222
2134 4996
2135 276
2135 397
2135 515
2135 1009
2135 2913
2135 3919
2135 4093
2136 11
2136 350
2136 515
2136 750
2136 1692
2137 15
2137 16
2137 1107
2138 1
2138 10
2138 131
2138 135
2138 701
2138 1122
2138 1161
2138 2522
2138 4868
2138 4973
2139 8
2139 74
2139 185
2139 636
2139 1667
2139 1972
2139 2863
2139 3443
2139 4542
2139 4646
2140 16
2140 25
2140 40
2140 430
2140 668
2140 1014
2140 2906
2140 3391
2140 3572
2140 3671
2141 2
2141 68
2141 2104
2141 2780
2141 3559
2141 3921
2141 4460
2141 4734
2142 110
2142 246
2142 1274
2142 2649
2142 3371
2142 4617
2143 21
2143 311
2143 710
2143 761
2143 2449
2143 2759
2143 3728
2143 3948
2143 4086
2144 1
2144 2
2144 8
2144 32
2144 572
2144 805
2144 872
2144 928
2144 982
2144 1183
2144 3161
2144 3581
2144 4514
2144 4549
2145 924
2145 1722
2146 3
2146 154
2146 3048
2147 3
2147 68
2147 175
2147 860
2147 1334
2147 1418
2147 2864
2147 3171
2147 4659
2148 233
2148 499
2148 683
2149 263
2149 391
2149 515
2149 1494
2149 1567
2149 2375
2149 2476
2149 3431
2150 1
2150 144
2150 1617
2150 1945
2150 3456
2150 4116
2150 4791
2151 4
2151 62
2151 300
2151 537
2151 712
2151 792
2151 1757
2151 2012
2151 2646
2151 2898
2151 4426
2152 7
2152 39
2152 72
2152 176
2152 671
2152 884
2153 2
2153 440
2153 898
2154 138
2154 160
2154 247
2154 705
2154 1505
2154 2939
2154 4642
2155 125
2155 300
2155 1085
2155 1362
2155 1987
2155 2283
2155 3568
2156 13
2156 322
2156 524
2156 1812
2156 3133
2156 3633
2157 10
2157 24
2157 514
2157 778
2157 1112
2157 1623
2157 2346
2158 27
2158 157
2158 229
2158 664
2158 688
2158 3566
2158 4738
2159 69
2159 204
2159 223
2159 225
2159 413
2159 791
2159 1948
2159 2018
2159 2901
2159 3515
2159 3648
2159 4371
2159 4551
2160 5
2160 103
2160 611
2160 1488
2160 2124
2160 3959
2161 0
2161 65
2161 782
2161 1048
2161 2306
2161 3335
2162 1
2162 12
2162 439
2162 652
2162 738
2162 855
2162 969
2162 3089
2162 3371
2162 3653
2162 4681
2163 8
2163 11
2163 44
2163 101
2163 635
2163 784
2163 1152
2163 1498
2163 1535
2163 4547
2164 16
2164 51
2164 58
2164 95
2164 336
2164 400
2164 1362
2164 2525
2164 4446
2165 3
2165 15
2165 17
2165 62
2165 160
2165 293
2165 429
2165 598
2165 722
2165 1215
2165 1331
2165 2074
2165 2470
2165 2958
2165 3481
2165 4243
2165 4413
2165 4631
2166 24
2166 629
2166 1818
2166 2039
2166 2627
2166 2976
2166 3138
2166 4548
2166 4741
2167 110
2167 150
2167 248
2167 323
2167 488
2167 912
2167 1902
2167 2410
2167 2587
2167 3502
2168 11
2168 21
2168 26
2168 218
2168 1106
2168 1639
2168 1881
2168 2393
2168 3198
2168 3735
2169 1701
2170 9
2170 416
2170 591
2170 885
2170 1611
2171 251
2171 629
2171 751
2171 1001
2171 1123
2171 1304
2171 2220
2171 2856
2171 2921
2171 3018
2171 3403
2171 3842
2171 3939
2171 4006
2172 16
2172 463
2172 906
2172 3163
2172 3677
2172 4997
2173 3
2173 229
2173 454
2173 2058
2173 2768
2173 4309
2174 14
2174 93
2174 674
2174 991
2174 1525
2174 1526
2174 2701
2174 3985
2174 4487
2174 4815
2175 53
2175 193
2175 313
2175 324
2175 733
2175 3353
2176 76
2176 512
2176 1192
2176 1218
2176 3796
2176 4165
2177 8
2177 14
2177 334
2177 632
2177 1203
2177 1774
2177 2003
2177 2187
2178 0
2178 161
2178 178
2178 520
2178 952
2178 1210
2178 2319
2178 3532
2178 3959
2178 4094
2178 4842
2179 6
2179 70
2179 126
2179 380
2179 442
2179 922
2179 1343
2179 1503
2179 2076
2179 2432
2179 3181
2179 3241
2179 3551
2179 3662
2179 3694
2179 4027
2180 10
2180 35
2180 56
2180 144
2180 1662
2180 1713
2180 2000
2180 3681
2181 7
2181 10
2181 20
2181 77
2181 172
2181 791
2181 1651
2181 2123
2181 2691
2181 3311
2181 3495
2182 23
2182 383
2182 4172
2183 35
2183 167
2183 191
2183 285
2183 572
2184 11
2184 56
2184 267
2184 918
2184 1722
2184 2574
2184 4530
2185 2
2185 251
2185 408
2185 709
2185 903
2185 2758
2185 3217
2185 4074
2185 4236
2185 4328
2186 1227
2186 1292
2186 1398
2187 8
2187 18
2187 27
2187 86
2187 178
2187 222
2187 900
2187 1119
2187 2177
2187 2395
2187 2410
2187 2877
2187 2961
2187 3790
2187 3803
2188 5
2188 23
2188 246
2188 566
2188 742
2188 964
2188 1216
2188 3416
2189 0
2189 103
2189 201
2189 225
2189 469
2189 910
2189 1091
2189 1801
2189 2014
2189 3214
2189 3929
2189 3944
2189 4828
2190 7
2190 22
2190 43
2190 689
2190 898
2190 1203
2190 1332
2190 1440
2190 3496
2190 3817
2191 5
2191 95
2191 192
2191 1959
2191 2318
2191 3271
2191 3526
2191 3706
2191 4539
2191 4615
2192 21
2192 350
2192 740
2192 928
2192 981
2192 1775
2192 2676
2192 3171
2192 3377
2192 3801
2193 2
2193 244
2193 353
2193 1186
2193 1670
2194 6
2194 33
2194 60
2194 251
2194 377
2194 849
2194 1219
2194 2431
2194 3456
2194 4406
2195 4
2195 33
2195 58
2195 385
2195 788
2195 1488
2195 1824
2195 1892
2195 2652
2195 2816
2195 2841
2195 3773
2195 4304
2196 27
2196 131
2196 185
2196 1244
2196 1285
2196 2208
2196 3693
2196 4707
2197 25
2197 27
2197 101
2197 112
2197 310
2197 321
2197 353
2197 2532
2197 2989
2198 47
2198 50
2198 1314
2198 1667
2198 3675
2198 4345
2199 0
2199 63
2199 886
2199 1055
2199 2076
2199 2213
2199 2321
2199 2884
2199 3410
2199 3473
2199 3606
2200 7
2200 478
2200 1796
2200 2549
2200 2599
2201 33
2201 170
2201 257
2201 398
2201 1261
2201 1407
2201 3491
2201 4292
2202 17
2202 116
2202 369
2202 674
2202 2010
2202 4993
2203 25
2203 120
2203 213
2203 1030
2203 1307
2203 2714
2203 3758
2204 17
2204 24
2204 27
2204 556
2204 683
2204 918
2204 2030
2204 2505
2204 2510
2204 3240
2204 3818
2204 4670
2204 4766
2205 27
2205 48
2205 175
2205 956
2205 1282
2205 1584
2205 2128
2205 2217
2205 2592
2206 17
2206 22
2206 257
2206 421
2206 1843
2206 1881
2206 1925
2206 2961
2207 12
2207 57
2207 59
2207 103
2207 194
2207 702
2207 1509
2207 1674
2207 2505
2207 2557
2207 3523
2207 3605
2207 3607
2207 4801
2208 3
2208 160
2208 1172
2208 1600
2208 1609
2208 2196
2208 2507
2208 3035
2208 3143
2208 4749
2209 0
2209 12
2210 2
2210 125
2210 274
2210 1438
2211 230
2211 712
2211 1026
2211 1538
2211 2904
2211 3056
2211 3214
2211 4429
2212 12
2212 21
2212 38
2212 135
2212 160
2212 232
2212 728
2212 2076
2212 2096
2212 3020
2212 3209
2212 3941
2213 7
2213 330
2213 906
2213 2199
2213 2413
2213 2571
2213 2945
2213 3646
2214 0
2214 705
2214 1456
2214 1804
2214 3262
2215 5
2215 130
2215 249
2215 2598
2215 3275
2216 1
2216 8
2216 258
2216 517
2216 910
2216 1007
2216 1063
2216 1602
2216 1807
2216 3109
2216 3754
2217 55
2217 75
2217 95
2217 96
2217 274
2217 615
2217 1081
2217 2205
2217 2971
2217 3021
2217 3162
2217 3655
2217 4544
2217 4830
2218 2
2218 17
2218 133
2218 1077
2218 1972
2218 2864
2218 4119
2218 4475
2218 4721
2219 13
2219 351
2219 540
2219 590
2219 776
2219 3475
2219 4400
2220 5
2220 41
2220 133
2220 387
2220 1140
2220 2171
2220 4145
2221 84
2221 86
2221 810
2221 2251
2221 3819
2221 4006
2221 4918
2222 5
2222 53
2222 64
2222 347
2222 441
2222 1056
2222 1930
2222 3159
2222 3440
2222 3794
2222 4981
2223 12
2223 17
2223 131
2223 175
2223 384
2223 789
2223 868
2223 1548
2223 3144
2224 5
2224 40
2224 69
2224 127
2224 497
2224 1783
2225 3
2225 872
2225 1012
2226 63
2226 1086
2226 3474
2227 3
2227 25
2227 59
2227 285
2227 629
2227 1182
2227 2741
2227 3458
2227 3529
2228 0
2228 104
2228 125
2228 301
2228 460
2228 1127
2228 4171
2228 4232
2228 4321
2229 7
2229 17
2229 38
2229 540
2229 2302
2229 3055
2229 3137
2229 3618
2229 4027
2230 17
2230 118
2230 193
2230 1118
2230 1889
2230 3774
2231 17
2231 430
2231 1218
2231 1285
2231 1830
2231 2624
2231 3472
2231 3593
2232 18
2232 207
2232 689
2232 3105
2232 3497
2232 4189
2233 823
2233 1185
2233 1326
2233 1984
2233 2536
2233 2869
2234 13
2234 49
2234 115
2234 531
2234 1042
2234 1089
2234 1259
2234 1317
2234 1355
2235 5
2235 64
2235 88
2235 576
2235 3243
2235 3447
2235 4825
2235 4857
2236 17
2236 29
2236 64
2236 207
2236 1863
2237 3
2237 48
2237 60
2237 77
2237 596
2237 1834
2237 3871
2237 3971
2238 28
2238 33
2238 279
2238 304
2238 677
2238 1172
2238 1804
2238 1997
2238 2246
2238 2408
2238 2435
2238 2649
2238 4050
2238 4507
2239 19
2239 709
2239 981
2239 1312
2239 1381
2239 1563
2239 1789
2239 1933
2239 2247
2239 2302
2239 2590
2239 2601
2239 2696
2239 2796
2239 3283
2239 3298
2239 4022
2239 4108
2239 4206
2240 356
2240 646
2240 721
2240 1405
2240 3434
2241 18
2241 369
2241 500
2241 695
2241 985
2241 1292
2241 1646
2241 1723
2241 2092
2241 2624
2241 2862
2241 3391
2241 3697
2241 3905
2241 4047
2241 4672
2241 4864
2242 1259
2243 6
2243 15
2243 25
2243 86
2243 915
2243 1305
2243 2936
2243 3066
2243 3119
2243 3280
2243 4303
2244 697
2244 1334
2244 1797
2244 3284
2244 3427
2245 59
2245 397
2245 827
2245 1449
2245 4114
2246 33
2246 207
2246 351
2246 1107
2246 1428
2246 1903
2246 2238
2246 2506
2246 2898
2247 0
2247 13
2247 16
2247 215
2247 611
2247 1059
2247 2239
2247 2257
2247 2261
2247 3063
2247 4023
2247 4716
2248 153
2248 419
2248 1389
2248 1950
2249 5
2249 344
2249 596
2249 852
2249 2013
2249 4862
2250 16
2250 48
2250 51
2250 241
2250 519
2250 1011
2250 1043
2250 1656
2250 2347
2250 3333
2250 4570
2250 4847
2251 3
2251 63
2251 383
2251 1650
2251 2221
2252 128
2252 221
2252 320
2252 1467
2252 3049
2252 3409
2252 3605
2253 7
2253 30
2253 495
2253 774
2253 1185
2253 1467
2253 1710
2253 1751
2253 2256
2253 2568
2253 4972
2254 792
2254 1313
2254 1660
2254 2317
2255 148
2255 185
2255 287
2255 642
2255 665
2255 805
2255 1332
2255 1887
2255 2489
2255 4713
2255 4901
2256 1
2256 17
2256 87
2256 234
2256 531
2256 2253
2257 9
2257 1057
2257 1613
2257 2075
2257 2129
2257 2247
2257 2666
2257 3749
2258 2
2258 853
2258 1506
2259 73
2259 1315
2259 1717
2260 232
2260 333
2260 524
2260 540
2260 4329
2261 436
2261 459
2261 867
2261 1087
2261 2247
2261 2323
2261 2662
2261 3785
2262 8
2262 16
2262 146
2262 345
2262 405
2262 851
2262 2879
2262 3920
2262 4671
2262 4810
2263 17
2263 104
2263 208
2263 764
2263 855
2263 2046
2263 2065
2264 12
2264 31
2264 312
2264 663
2264 1727
2264 1788
2264 2450
2264 3390
2264 3521
2265 153
2265 258
2265 407
2265 648
2265 1966
2265 3387
2265 3758
2265 4415
2266 18
2266 19
2266 59
2266 296
2266 472
2266 512
2266 1664
2266 2492
2266 3506
2266 3563
2266 4759
2267 42
2267 1373
2267 1859
2267 1883
2267 1900
2267 4500
2268 4
2268 25
2268 660
2268 1639
2268 1651
2268 1691
2268 2021
2268 3022
2268 3595
2268 4577
2268 4790
2269 20
2269 287
2269 814
2269 1215
2269 1218
2269 1641
2269 2375
2269 3338
2269 3703
2269 4300
2270 3
2270 83
2270 819
2271 5
2271 22
2271 58
2271 382
2271 803
2271 1749
2271 2615
2271 2708
2271 4756
2271 4853
2272 0
2272 10
2272 242
2272 326
2272 333
2272 428
2272 771
2272 2118
2272 2671
2272 3065
2273 27
2273 216
2273 582
2273 1205
2273 1237
2273 1535
2273 2898
2273 4542
2274 12
2274 68
2274 630
2274 1979
2274 3429
2274 3641
2275 10
2275 653
2275 1802
2276 23
2276 51
2276 179
2276 234
2276 249
2276 1161
2276 2722
2277 38
2277 272
2277 495
2277 658
2277 1460
2277 1907
2277 2385
2277 3916
2277 4871
2278 305
2278 362
2278 497
2278 501
2278 721
2278 1423
2278 2807
2278 3400
2278 4377
2279 12
2279 21
2279 192
2279 323
2279 953
2279 1079
2279 1813
2279 2103
2279 2925
2279 3889
2280 0
2280 23
2280 57
2280 103
2280 265
2280 328
2280 410
2280 816
2280 2328
2280 2694
2281 754
2282 5
2282 17
2282 19
2282 147
2282 225
2282 226
2282 362
2282 1173
2282 1713
2282 1804
2283 17
2283 336
2283 380
2283 815
2283 1968
2283 2155
2283 2458
2283 4657
2284 56
2284 716
2284 1070
2284 1257
2284 1349
2284 1476
2284 3223
2284 4602
2285 0
2285 15
2285 165
2285 407
2285 1262
2285 1504
2285 4201
2285 4445
2286 0
2286 3
2286 27
2286 122
2286 175
2286 369
2286 509
2286 914
2286 2474
2286 4280
2286 4615
2287 6
2287 533
2287 709
2287 756
2287 1682
2287 1922
2288 155
2288 262
2288 333
2288 3347
2288 4364
2289 7
2289 184
2289 207
2289 436
2289 1014
2289 1278
2289 2413
2289 2463
2289 2533
2289 2557
2289 3527
2289 3648
2290 128
2290 1052
2290 1623
2291 3
2291 9
2291 19
2291 21
2291 45
2291 239
2291 258
2291 602
2291 1137
2291 2058
2291 2292
2291 2377
2291 3756
2291 3870
2292 30
2292 140
2292 615
2292 837
2292 1008
2292 1052
2292 1192
2292 1693
2292 2291
2292 3028
2292 3194
2293 399
2293 996
2293 1317
2293 2024
2293 2027
2293 2611
2293 2808
2293 3853
2294 409
2294 537
2294 923
2294 1314
2294 1885
2294 2723
2294 3166
2294 4516
2295 19
2295 126
2295 280
2295 675
2295 1134
2295 1423
2295 1923
2295 3604
2295 4457
2295 4691
2296 7
2296 33
2296 49
2296 155
2296 533
2296 1284
2296 3567
2297 11
2297 22
2297 454
2297 633
2297 1478
2297 3770
2297 4187
2298 1
2298 5
2298 16
2298 265
2298 602
2298 620
2298 711
2298 1317
2298 1473
2298 1572
2298 2100
2298 3449
2299 5
2299 113
2299 156
2299 287
2299 1085
2299 2081
2300 711
2300 1722
2300 1726
2300 1869
2300 3020
2300 3317
2300 3683
2301 72
2301 101
2301 108
2301 256
2301 541
2301 688
2301 2309
2301 2422
2301 2837
2301 3724
2302 6
2302 289
2302 449
2302 650
2302 2229
2302 2239
2302 3363
2302 4454
2303 1
2303 6
2303 18
2303 83
2303 269
2303 789
2303 810
2303 1743
2303 2620
2303 3723
2304 18
2304 91
2304 212
2304 843
2304 1220
2305 20
2305 423
2305 456
2305 876
2305 2518
2305 3347
2305 3695
2306 3
2306 8
2306 446
2306 554
2306 1788
2306 1847
2306 1899
2306 2161
2307 33
2307 57
2307 149
2307 212
2307 343
2307 378
2307 511
2307 3473
2307 4053
2307 4711
2308 10
2308 21
2308 362
2308 473
2308 840
2308 1404
2308 1450
2308 4265
2308 4964
2309 4
2309 16
2309 51
2309 199
2309 261
2309 2301
2310 9
2310 150
2310 309
2310 519
2310 704
2310 854
2310 2843
2311 4
2311 21
2311 22
2311 86
2311 391
2311 952
2311 1073
2311 1548
2312 0
2312 18
2312 19
2312 558
2312 703
2312 1487
2312 3702
2312 4080
2312 4903
2313 18
2313 28
2313 300
2313 420
2313 1244
2313 1970
2313 4998
2314 0
2314 500
2314 765
2314 934
2314 1291
2314 2687
2314 3525
2314 3903
2315 32
2315 192
2315 293
2315 413
2315 755
2315 1121
2315 1390
2315 2818
2315 3553
2315 3916
2315 4385
2316 166
2316 334
2316 991
2316 1835
2316 2790
2316 4256
2316 4817
2317 15
2317 212
2317 225
2317 2254
2317 3732
2318 10
2318 207
2318 439
2318 837
2318 2191
2319 5
2319 18
2319 88
2319 179
2319 264
2319 1400
2319 2178
2319 2816
2319 4133
2320 71
2320 971
2320 1840
2320 2129
2321 17
2321 23
2321 79
2321 220
2321 253
2321 554
2321 694
2321 943
2321 1243
2321 2199
2321 2771
2321 4199
2321 4686
2322 10
2322 15
2322 30
2322 49
2322 58
2322 64
2322 86
2322 482
2322 500
2322 641
2322 683
2322 2692
2322 3686
2323 5
2323 982
2323 2261
2323 2991
2323 3406
2323 3495
2323 4938
2324 18
2324 193
2324 382
2325 161
2325 767
2325 1199
2325 1813
2325 3397
2325 4467
2326 287
2326 329
2326 434
2326 629
2326 732
2326 798
2326 2391
2326 2775
2326 2804
2326 3062
2326 3305
2326 3867
2327 40
2327 220
2327 785
2327 4280
2328 6
2328 713
2328 1097
2328 1165
2328 1519
2328 1741
2328 2280
2328 4220
2329 8
2329 14
2329 27
2329 278
2329 707
2329 868
2329 985
2329 1507
2329 1591
2329 2545
2329 3405
2329 4034
2329 4116
2329 4231
2330 6
2330 54
2330 56
2330 393
2330 517
2330 587
2330 706
2330 1425
2330 1583
2330 1862
2330 2441
2330 2766
2330 3215
2330 3467
2330 4006
2331 44
2331 101
2331 174
2331 196
2331 337
2331 1910
2331 2022
2331 3630
2331 3689
2331 3710
2331 4266
2331 4525
2331 4606
2331 4835
2332 13
2332 166
2332 256
2332 304
2332 488
2332 979
2332 1590
2333 7
2333 12
2333 13
2333 35
2333 292
2333 548
2334 44
2334 49
2334 63
2334 325
2334 525
2334 1282
2335 4
2335 12
2335 21
2335 94
2335 164
2335 360
2335 432
2335 1023
2335 1170
2335 1312
2335 1957
2335 2377
2335 2542
2335 2588
2335 2784
2335 3462
2335 4200
2336 981
2337 48
2337 51
2337 162
2337 745
2337 906
2338 193
2338 951
2338 1671
2338 1803
2338 3737
2339 164
2339 553
2339 1338
2339 1626
2339 4711
2339 4763
2340 25
2340 174
2340 192
2340 635
2340 1091
2340 2583
2340 4865
2340 4951
2341 48
2341 815
2341 952
2341 981
2341 2469
2341 2615
2342 254
2342 467
2342 691
2342 905
2342 1479
2343 6
2343 12
2343 162
2343 561
2343 1130
2343 1179
2343 1795
2343 2891
2344 4
2344 6
2344 8
2344 14
2344 87
2344 163
2344 545
2344 1435
2344 1887
2344 2548
2344 2616
2344 2623
2345 12
2345 27
2345 237
2345 380
2345 3999
2345 4146
2346 13
2346 16
2346 35
2346 372
2346 515
2346 674
2346 2157
2346 3009
2346 3223
2346 3326
2346 4765
2347 7
2347 90
2347 188
2347 615
2347 867
2347 2250
2347 2623
2347 3711
2347 4582
2348 97
2348 212
2348 299
2348 783
2348 2660
2348 2714
2348 2777
2349 1
2349 393
2349 574
2349 1533
2349 4398
2350 160
2350 517
2350 1091
2351 13
2351 141
2351 504
2351 663
2351 1611
2351 1930
2351 4915
2352 124
2352 208
2353 7
2353 122
2353 296
2353 426
2353 734
2353 1242
2353 1861
2353 2055
2353 2709
2353 3095
2353 3274
2353 3391
2353 3918
2353 4738
2354 334
2354 376
2354 803
2354 1230
2355 83
2355 187
2355 561
2355 1442
2355 1712
2355 2618
2355 3963
2356 21
2356 147
2356 330
2356 384
2356 1572
2356 3857
2356 4088
2357 171
2357 300
2357 520
2357 938
2357 1432
2357 2078
2357 4317
2358 2
2358 16
2358 43
2358 225
2358 355
2358 460
2358 1131
2358 1175
2358 3451
2359 1
2359 2
2359 9
2359 343
2359 398
2359 1828
2359 1979
2360 2
2360 14
2360 16
2360 94
2360 102
2360 197
2360 255
2360 2457
2360 3990
2360 4298
2360 4908
2361 5
2361 71
2361 110
2361 204
2361 2967
2361 4908
2362 33
2362 184
2362 354
2362 1202
2362 1242
2362 1646
2362 2414
2362 3587
2362 3932
2362 4347
2362 4758
2363 9
2363 120
2363 198
2363 369
2363 571
2363 1120
2363 1576
2363 3350
2363 3907
2363 4490
2363 4758
2363 4902
2364 6
2364 202
2364 708
2364 1356
2364 1878
2364 3501
2365 43
2365 80
2365 95
2365 126
2365 669
2365 2398
2365 2460
2365 3895
2365 4033
2365 4644
2365 4803
2366 313
2366 662
2366 1220
2366 3026
2366 4277
2366 4789
2367 1
2367 21
2367 410
2367 566
2367 588
2367 1334
2367 1951
2367 3573
2368 40
2368 56
2368 702
2368 980
2368 1321
2368 1496
2368 1550
2368 2508
2368 3039
2369 2
2369 49
2369 59
2369 1854
2369 3734
2370 22
2370 498
2370 505
2370 603
2370 1119
2370 3014
2370 3196
2370 3228
2370 3328
2370 3752
2371 13
2371 27
2371 72
2371 947
2371 1011
2371 2514
2371 2640
2371 3781
2371 4702
2371 4919
2371 4935
2372 1
2372 3
2372 73
2372 317
2372 575
2372 651
2372 1634
2372 1731
2372 1978
2372 3008
2372 3427
2372 4135
2372 4665
2373 1
2373 11
2373 23
2373 45
2373 177
2373 265
2373 1268
2373 2104
2373 2535
2373 3912
2374 1
2374 175
2374 362
2374 911
2374 1644
2374 1757
2374 1774
2374 1917
2374 2745
2374 2807
2374 2879
2374 3391
2374 4970
2375 6
2375 12
2375 531
2375 532
2375 1584
2375 1902
2375 2059
2375 2149
2375 2269
2375 3558
2375 4073
2375 4577
2375 4638
2375 4794
2376 75
2376 304
2376 454
2376 503
2376 656
2376 764
2376 1192
2376 1405
2376 1411
2376 3180
2376 3573
2376 4539
2376 4596
2376 4866
2377 44
2377 56
2377 735
2377 742
2377 1039
2377 2291
2377 2335
2377 2581
2377 3456
2377 3862
2378 9
2378 17
2378 46
2378 1852
2378 2822
2378 2970
2378 3138
2378 4664
2379 20
2379 336
2379 352
2379 468
2379 1197
2380 1
2380 46
2380 160
2380 324
2380 910
2380 1132
2380 1761
2381 17
2381 91
2381 194
2381 716
2381 878
2381 1033
2381 1293
2381 1519
2381 4750
2382 3
2382 164
2382 269
2382 746
2382 1767
2382 2411
2382 2591
2382 3212
2383 63
2383 215
2383 642
2383 670
2383 1099
2383 2651
2384 19
2384 309
2384 431
2384 436
2384 749
2384 874
2384 1460
2384 2554
2384 2827
2384 2917
2384 3068
2384 3447
2384 3783
2384 3860
2385 21
2385 462
2385 842
2385 1181
2385 1613
2385 2277
2385 2685
2385 2998
2385 4415
2385 4708
2386 2
2386 52
2386 317
2386 832
2387 55
2387 58
2387 59
2387 100
2387 161
2387 386
2387 3638
2388 4
2388 17
2388 3665
2389 33
2389 94
2389 215
2389 1560
2389 2067
2389 4218
2389 4256
2390 8
2390 74
2390 174
2390 338
2390 637
2390 871
2390 4521
2391 7
2391 32
2391 38
2391 233
2391 1396
2391 2326
2391 2414
2391 2618
2391 4215
2391 4385
2392 9
2392 85
2392 113
2392 119
2392 179
2392 665
2392 887
2392 2056
2392 3073
2393 6
2393 12
2393 86
2393 856
2393 1922
2393 2038
2393 2168
2393 4581
2394 6
2394 185
2394 191
2394 244
2394 264
2394 307
2394 462
2394 775
2394 949
2394 2583
2394 2606
2394 2823
2394 2959
2395 118
2395 2187
2396 107
2396 330
2396 1140
2396 2531
2396 4044
2397 7
2397 158
2397 1123
2397 1661
2397 1887
2397 3983
2397 4913
2398 4
2398 10
2398 35
2398 45
2398 48
2398 134
2398 162
2398 410
2398 495
2398 2365
2399 16
2399 534
2399 1887
2399 2604
2399 3804
2399 4956
2400 4
2400 24
2400 157
2400 1791
2401 12
2401 20
2401 74
2401 1102
2401 1920
2401 2750
2401 3046
2401 4038
2401 4472
2402 62
2402 1650
2403 64
2403 264
2403 418
2403 646
2403 1867
2403 2413
2404 16
2404 30
2404 69
2404 185
2404 239
2404 478
2404 1120
2404 1193
2404 1299
2404 3462
2405 0
2405 10
2405 95
2405 778
2405 1516
2405 1853
2405 2525
2405 3014
2405 3716
2405 3831
2405 4526
2405 4940
2406 0
2406 4
2406 22
2406 167
2406 567
2406 737
2406 1061
2406 2465
2406 4070
2407 19
2407 49
2407 73
2407 546
2407 720
2407 1938
2407 1989
2407 2573
2408 4
2408 64
2408 570
2408 1303
2408 2238
2408 2756
2408 3058
2408 3531
2409 4
2409 13
2409 20
2409 32
2409 38
2409 228
2409 1853
2409 3238
2409 3528
2409 4353
2409 4741
2410 787
2410 1542
2410 1692
2410 2059
2410 2167
2410 2187
2410 2544
2410 3159
2410 3179
2410 3775
2410 4108
2410 4204
2410 4340
2410 4845
2411 2
2411 57
2411 158
2411 1533
2411 2382
2411 2436
2411 3787
2412 21
2412 144
2412 360
2412 505
2412 695
2412 1655
2412 3789
2413 310
2413 1602
2413 2213
2413 2289
2413 2403
2413 2555
2413 3606
2414 1
2414 78
2414 140
2414 1123
2414 1800
2414 1812
2414 2362
2414 2391
2414 2428
2414 3302
2414 3484
2415 89
2415 266
2415 274
2415 368
2415 435
2415 949
2415 1436
2415 4838
2416 0
2416 62
2416 95
2416 351
2416 360
2416 405
2416 2693
2417 63
2417 795
2417 1193
2417 1370
2417 2766
2417 3309
2417 3338
2418 3
2418 10
2418 27
2418 192
2418 876
2418 2086
2418 2747
2418 4185
2419 15
2419 83
2419 207
2419 332
2419 351
2419 407
2419 1234
2419 1538
2419 2514
2419 3252
2419 4138
2420 820
2420 867
2420 934
2420 1530
2420 1655
2420 2654
2421 6
2421 84
2421 755
2421 1503
2421 1942
2421 2605
2421 2864
2421 3484
2421 3935
2422 27
2422 272
2422 663
2422 700
2422 1094
2422 1334
2422 2301
2422 2692
2422 3549
2423 2
2423 97
2423 467
2423 497
2423 596
2423 1085
2423 1226
2424 125
2424 911
2424 1290
2424 1787
2425 11
2425 42
2425 1014
2425 1094
2425 1300
2425 1831
2425 3399
2425 3613
2425 4705
2426 7
2426 63
2426 100
2426 278
2426 1116
2426 2916
2427 18
2427 51
2427 132
2427 509
2427 815
2427 1680
2427 4859
2428 16
2428 225
2428 661
2428 1184
2428 1294
2428 2414
2428 3416
2428 3755
2428 3930
2428 4471
2429 22
2429 304
2429 333
2429 622
2429 3779
2430 7
2430 18
2430 26
2430 144
2430 222
2430 1450
2430 3768
2430 4788
2431 7
2431 67
2431 337
2431 857
2431 871
2431 930
2431 1019
2431 1245
2431 2194
2431 2823
2431 2935
2431 3178
2431 3577
2431 4722
2432 158
2432 218
2432 300
2432 1126
2432 1258
2432 1646
2432 2179
2432 2751
2432 2995
2432 3876
2433 113
2433 468
2433 475
2433 1131
2433 1400
2433 4493
2434 15
2434 45
2434 48
2434 117
2434 771
2435 2
2435 2238
2435 2783
2435 2943
2435 3979
2436 1
2436 30
2436 120
2436 1391
2436 1687
2436 2411
2436 3410
2437 18
2437 22
2437 50
2437 124
2437 786
2437 1803
2437 3467
2437 3635
2437 4079
2437 4656
2438 6
2438 503
2438 538
2438 1258
2438 1338
2438 1882
2438 2035
2438 4022
2439 615
2439 656
2439 1717
2439 2755
2439 3665
2439 4911
2440 13
2440 17
2440 48
2440 63
2440 239
2440 625
2440 978
2440 1541
2440 1591
2440 3433
2440 4106
2440 4553
2440 4621
2441 39
2441 86
2441 175
2441 556
2441 2330
2442 225
2442 601
2442 688
2443 5
2443 28
2443 59
2443 924
2443 1230
2443 1570
2443 1893
2443 2016
2443 2644
2443 3605
2443 4177
2444 12
2444 170
2444 718
2444 803
2444 860
2444 1194
2444 2977
2444 4357
2444 4415
2444 4721
2445 57
2445 230
2445 257
2445 280
2445 609
2445 3248
2445 3289
2446 16
2446 80
2446 83
2446 729
2446 1442
2446 2733
2446 2900
2447 6
2447 237
2447 336
2447 410
2447 1049
2447 1272
2447 1504
2447 2021
2447 3493
2448 32
2448 136
2448 500
2448 599
2448 1052
2448 1279
2448 1512
2448 3569
2448 4019
2449 7
2449 11
2449 17
2449 2143
2450 88
2450 218
2450 572
2450 1059
2450 1405
2450 1515
2450 2264
2450 2543
2450 2796
2450 2907
2450 3013
2450 3197
2450 3762
2450 4455
2451 17
2451 87
2451 886
2451 1673
2451 1902
2451 3016
2452 16
2452 244
2452 1054
2452 1564
2452 2832
2452 3031
2452 4075
2453 12
2453 32
2453 93
2453 167
2453 505
2453 752
2453 1205
2453 1660
2453 3302
2453 3872
2453 3890
2453 4781
2453 4899
2454 14
2454 128
2454 718
2454 768
2454 1550
2454 1729
2454 4351
2454 4976
2455 184
2455 279
2455 446
2455 452
2455 612
2455 1077
2455 1890
2455 4717
2456 8
2456 14
2456 27
2456 293
2456 300
2456 630
2456 907
2456 1646
2456 1939
2456 3045
2456 3364
2456 3825
2456 4002
2456 4348
2457 4
2457 35
2457 405
2457 554
2457 1087
2457 1206
2457 2087
2457 2360
2457 4457
2458 262
2458 782
2458 1515
2458 1567
2458 1972
2458 2283
2458 2546
2458 2650
2458 3337
2458 4612
2459 2
2459 1645
2459 1800
2460 2
2460 7
2460 56
2460 2365
2460 2600
2460 2653
2460 2820
2460 3026
2460 3124
2460 3442
2460 3544
2460 3620
2460 4661
2461 6
2461 18
2461 218
2461 308
2461 1814
2461 1912
2461 2915
2461 3005
2461 3558
2462 53
2462 1593
2463 2
2463 73
2463 124
2463 273
2463 334
2463 881
2463 1761
2463 2289
2463 2629
2463 2962
2463 2989
2463 3063
2463 3162
2464 5
2464 534
2464 814
2464 1004
2464 1943
2464 4447
2465 0
2465 27
2465 51
2465 394
2465 526
2465 2406
2466 37
2466 49
2466 488
2466 1069
2466 1976
2466 3062
2466 3320
2467 2
2467 8
2467 12
2467 309
2467 386
2467 814
2467 2644
2467 3970
2468 12
2468 44
2468 51
2468 93
2468 447
2468 716
2468 878
2468 3026
2469 51
2469 129
2469 205
2469 389
2469 1218
2469 1783
2469 2341
2469 2896
2469 3186
2469 3396
2469 4028
2469 4521
2469 4654
2470 10
2470 84
2470 405
2470 676
2470 1127
2470 1690
2470 2165
2470 3138
2470 3166
2470 3612
2470 4149
2470 4941
2471 2
2471 5
2471 175
2471 287
2471 325
2471 856
2471 1479
2471 2632
2471 2647
2471 4492
2471 4927
2471 4975
2472 41
2472 71
2472 102
2472 351
2472 1709
2473 50
2473 190
2473 408
2473 695
2473 882
2473 1314
2473 1458
2473 2847
2473 3436
2473 4433
2473 4486
2473 4739
2474 8
2474 11
2474 14
2474 16
2474 668
2474 1054
2474 1473
2474 1495
2474 2286
2474 4229
2475 11
2475 99
2475 172
2475 453
2475 1018
2475 1119
2475 1197
2475 1720
2475 2663
2475 3139
2475 4295
2475 4563
2476 147
2476 248
2476 257
2476 399
2476 694
2476 1233
2476 2149
2476 4078
2477 430
2477 727
2477 747
2477 1323
2477 3595
2477 3684
2478 19
2478 25
2478 38
2478 44
2478 114
2479 11
2479 16
2479 90
2479 262
2479 415
2479 649
2479 1989
2479 4091
2479 4338
2479 4380
2479 4699
2480 4
2480 37
2480 180
2480 220
2480 903
2480 1039
2480 1773
2480 3331
2480 3753
2480 3898
2480 4854
2481 1
2481 89
2481 244
2481 248
2481 418
2481 1550
2481 2118
2481 2771
2481 3264
2481 4062
2482 17
2482 119
2482 244
2482 635
2482 3177
2482 3576
2483 5
2483 7
2483 10
2483 25
2483 300
2483 457
2483 864
2483 3074
2483 3091
2483 4639
2484 0
2484 4
2484 130
2484 241
2484 1521
2484 1624
2484 1888
2484 3306
2484 3805
2484 4419
2485 47
2485 65
2485 405
2485 583
2485 597
2485 1902
2485 4239
2486 40
2486 79
2486 761
2486 1161
2486 1875
2486 3101
2487 212
2487 518
2487 596
2487 611
2487 823
2487 857
2487 882
2487 1127
2487 1360
2487 2923
2487 3980
2487 4116
2488 3
2488 4
2488 27
2488 139
2488 509
2488 843
2488 871
2488 3002
2488 3526
2488 4187
2489 11
2489 131
2489 186
2489 565
2489 743
2489 954
2489 1400
2489 1959
2489 2092
2489 2255
2489 2628
2489 3083
2489 3172
2489 3366
2489 4436
2490 5
2490 31
2490 297
2491 8
2491 10
2491 1407
2491 1720
2492 14
2492 74
2492 514
2492 550
2492 660
2492 1456
2492 2266
2492 2602
2492 3027
2492 3216
2492 4167
2492 4833
2493 0
2493 71
2493 148
2493 217
2493 787
2493 996
2493 1013
2493 1998
2494 875
2494 951
2494 1241
2494 1420
2494 3454
2494 3553
2495 7
2495 410
2495 415
2495 601
2495 1119
2495 1650
2495 2052
2495 3626
2496 150
2496 280
2496 683
2496 761
2496 1018
2496 1430
2496 1745
2496 3067
2496 3343
2496 4804
2497 1
2497 25
2497 101
2497 347
2497 937
2497 1474
2497 1661
2497 2001
2497 3038
2497 3340
2497 3386
2497 4210
2497 4837
2498 8
2498 10
2498 126
2498 221
2498 2790
2498 3059
2499 63
2499 519
2499 971
2499 1473
2499 2826
2499 2990
2499 3410
2500 14
2500 975
2501 33
2501 35
2501 163
2501 598
2501 679
2501 1193
2501 1603
2501 2130
2501 3267
2502 0
2502 178
2502 509
2502 747
2502 984
2502 1240
2502 1322
2502 3375
2502 4201
2502 4468
2502 4972
2503 10
2503 13
2503 84
2503 424
2503 566
2503 627
2503 1007
2503 1221
2504 0
2504 91
2504 322
2504 749
2504 1700
2504 4378
2504 4897
2505 14
2505 18
2505 489
2505 1904
2505 2130
2505 2204
2505 2207
2505 2788
2505 4160
2505 4415
2506 3
2506 8
2506 14
2506 1743
2506 2246
2507 2
2507 10
2507 12
2507 490
2507 682
2507 986
2507 2208
2507 2659
2508 11
2508 469
2508 509
2508 636
2508 911
2508 1710
2508 2368
2508 3127
2508 3340
2508 3853
2509 16
2509 174
2509 472
2509 987
2509 1815
2509 1889
2509 4336
2509 4805
2509 4902
2510 58
2510 78
2510 398
2510 605
2510 989
2510 2204
2510 4694
2511 65
2511 169
2511 224
2511 534
2511 741
2511 4758
2512 378
2512 1507
2512 1687
2513 30
2513 211
2513 1257
2513 1425
2514 0
2514 741
2514 2371
2514 2419
2514 3840
2515 16
2515 918
2515 1659
2515 1715
2515 3587
2515 3688
2515 4077
2516 6
2516 21
2516 182
2516 1164
2516 2839
2516 2872
2516 3590
2516 4962
2517 1371
2517 1632
2517 3972
2518 855
2518 1208
2518 1663
2518 2305
2519 72
2519 114
2519 337
2519 870
2519 1405
2519 1664
2519 2833
2519 4647
2519 4788
2520 9
2520 10
2520 38
2520 159
2520 473
2520 3565
2521 27
2521 53
2521 306
2521 525
2521 1170
2521 1296
2521 1332
2521 2018
2521 3836
2522 223
2522 1074
2522 1467
2522 2138
2522 2804
2522 4250
2522 4430
2522 4725
2523 9
2523 12
2523 426
2523 1030
2523 1533
2523 1687
2524 44
2524 146
2524 196
2524 1317
2524 1860
2524 3871
2524 4484
2524 4717
2525 160
2525 618
2525 928
2525 1022
2525 1304
2525 2164
2525 2405
2525 3998
2525 4958
2526 111
2526 164
2526 174
2526 192
2526 319
2526 416
2526 689
2526 798
2526 1082
2526 1235
2526 2757
2526 4906
2526 4955
2527 8
2527 122
2527 468
2527 1297
2528 73
2528 108
2528 789
2528 869
2528 886
2528 1796
2528 2728
2529 89
2529 169
2529 258
2529 430
2529 1091
2529 2100
2529 2618
2529 3286
2529 4344
2529 4517
2530 98
2530 336
2530 415
2530 3085
2530 4102
2531 19
2531 43
2531 369
2531 484
2531 712
2531 992
2531 1856
2531 2115
2531 2396
2531 2564
2531 3821
2532 0
2532 294
2532 348
2532 855
2532 1443
2532 2197
2533 278
2533 1315
2533 2289
2533 3499
2534 51
2534 1042
2534 1523
2534 1976
2534 3193
2535 12
2535 28
2535 91
2535 444
2535 1096
2535 1303
2535 2110
2535 2373
2535 3177
2535 4230
2536 7
2536 13
2536 19
2536 502
2536 1072
2536 2233
2536 2700
2536 4784
2537 64
2537 105
2537 212
2537 271
2537 468
2537 2936
2537 4400
2538 29
2538 176
2538 270
2538 289
2538 490
2538 497
2538 810
2538 1387
2538 3171
2538 3457
2538 4730
2538 4820
2539 60
2539 1049
2539 1291
2539 3991
2540 46
2540 85
2540 750
2540 949
2540 4818
2540 4827
2541 10
2541 28
2541 93
2541 196
2541 1238
2541 1487
2541 1603
2541 1994
2542 9
2542 150
2542 376
2542 506
2542 782
2542 2335
2542 4963
2543 5
2543 14
2543 23
2543 188
2543 614
2543 876
2543 1606
2543 2450
2543 2706
2543 2905
2543 2933
2543 3574
2543 3911
2543 4556
2544 156
2544 537
2544 1402
2544 1456
2544 2410
2544 3871
2544 4717
2545 15
2545 18
2545 19
2545 32
2545 184
2545 314
2545 1011
2545 1065
2545 2075
2545 2329
2545 2705
2545 3014
2545 3461
2545 3998
2545 4262
2545 4326
2545 4879
2546 6
2546 90
2546 398
2546 765
2546 783
2546 973
2546 2458
2546 3835
2546 3929
2547 33
2547 209
2547 1082
2547 1161
2547 2557
2547 3874
2548 87
2548 123
2548 661
2548 1150
2548 1991
2548 2344
2548 2581
2548 2729
2549 36
2549 246
2549 737
2549 1328
2549 1611
2549 2200
2549 4375
2549 4937
2549 4984
2550 11
2550 64
2550 745
2550 1551
2550 1577
2550 1818
2551 14
2551 205
2551 1007
2551 1044
2551 1282
2551 1872
2551 2012
2552 9
2552 10
2552 287
2552 290
2552 396
2552 791
2552 4425
2553 19
2553 196
2553 223
2553 251
2553 350
2553 496
2553 522
2553 678
2553 986
2553 4597
2553 4723
2554 14
2554 194
2554 220
2554 1201
2554 2384
2554 4948
2555 96
2555 382
2555 506
2555 2413
2555 2740
2555 3247
2556 85
2556 159
2556 721
2556 1315
2556 1440
2556 1492
2556 1899
2556 3313
2556 3905
2556 4762
2557 4
2557 1563
2557 1625
2557 2207
2557 2289
2557 2547
2557 2777
2557 3521
2557 4384
2557 4712
2558 179
2558 910
2558 1124
2558 1360
2559 12
2559 19
2559 22
2559 39
2559 122
2559 726
2559 1314
2559 1576
2559 2080
2559 2886
2559 3083
2559 3895
2559 4137
2559 4286
2560 15
2560 84
2560 567
2560 1814
2560 4615
2561 154
2561 176
2561 369
2561 554
2562 2
2562 240
2562 349
2562 386
2562 872
2562 1529
2562 2845
2562 4004
2562 4594
2563 154
2563 438
2563 527
2563 2023
2563 2737
2563 3625
2563 4845
2564 18
2564 42
2564 223
2564 560
2564 649
2564 2531
2564 4146
2565 5
2565 85
2565 94
2565 756
2565 1653
2565 2725
2565 4905
2566 390
2566 464
2566 885
2566 1381
2567 10
2567 21
2567 104
2567 2941
2568 18
2568 157
2568 398
2568 487
2568 1276
2568 1845
2568 2066
2568 2253
2568 2619
2568 2768
2568 4879
2569 29
2569 97
2569 135
2569 145
2569 170
2569 878
2569 4280
2569 4840
2569 4854
2570 7
2570 33
2570 77
2570 508
2570 614
2570 3099
2570 3255
2571 2
2571 273
2571 345
2571 1230
2571 2213
2572 38
2572 43
2572 150
2572 483
2572 592
2572 679
2572 980
2572 3649
2572 4069
2573 25
2573 2407
2573 3177
2573 4425
2573 4724
2574 4
2574 94
2574 176
2574 604
2574 2184
2574 3267
2575 2
2575 8
2575 82
2575 252
2575 600
2575 623
2575 2928
2575 3144
2576 1034
2576 1247
2576 1407
2576 1758
2576 3520
2576 4257
2577 62
2577 170
2577 537
2577 676
2577 750
2577 1714
2577 1885
2577 2729
2577 2803
2577 2859
2577 3067
2577 3208
2577 3719
2577 4111
2577 4137
2577 4353
2577 4372
2577 4606
2578 71
2578 258
2578 1119
2578 1179
2578 3737
2578 4094
2579 481
2579 688
2579 1613
2579 4619
2580 16
2580 194
2580 296
2580 1555
2581 7
2581 45
2581 872
2581 1644
2581 2377
2581 2548
2581 3804
2582 727
2582 1042
2582 1395
2582 1878
2582 2889
2582 3201
2582 4653
2583 0
2583 98
2583 533
2583 923
2583 945
2583 1349
2583 1979
2583 2340
2583 2394
2583 2866
2584 4
2584 25
2584 63
2584 148
2584 1083
2584 1215
2584 1431
2584 1666
2584 2115
2584 3116
2584 3267
2584 3542
2584 4273
2584 4558
2585 23
2585 179
2585 615
2585 743
2585 790
2585 1883
2585 4186
2586 4
2586 69
2586 189
2586 251
2586 395
2586 660
2586 853
2586 4279
2587 3
2587 439
2587 2167
2587 2979
2588 18
2588 57
2588 576
2588 906
2588 1507
2588 2335
2588 3056
2588 4353
2589 2
2589 35
2589 144
2589 835
2589 3161
2589 3339
2589 3937
2589 3971
2590 3
2590 14
2590 433
2590 467
2590 639
2590 1430
2590 1859
2590 2239
2590 2815
2590 2855
2591 0
2591 66
2591 426
2591 1075
2591 1734
2591 1876
2591 2382
2591 3194
2592 169
2592 180
2592 292
2592 522
2592 1828
2592 1903
2592 1993
2592 2205
2592 3407
2592 3692
2592 3792
2593 4
2593 18
2593 87
2593 142
2593 460
2593 558
2593 1496
2593 1991
2593 2112
2593 3078
2593 3891
2594 96
2594 322
2594 732
2594 988
2594 1676
2594 1756
2594 1757
2594 4332
2594 4434
2595 21
2595 50
2595 60
2595 140
2595 640
2595 899
2595 1062
2595 1771
2595 2858
2595 4653
2596 174
2596 204
2596 220
2596 382
2596 570
2596 770
2596 1361
2596 1994
2596 2892
2596 4441
2596 4668
2597 7
2597 24
2597 343
2597 397
2597 724
2597 903
2597 1199
2597 3127
2597 3449
2597 3835
2597 3929
2598 17
2598 77
2598 567
2598 1437
2598 2215
2598 4198
2599 1
2599 8
2599 9
2599 37
2599 1169
2599 1275
2599 2200
2600 122
2600 556
2600 1083
2600 1708
2600 2460
2600 4041
2601 31
2601 66
2601 614
2601 778
2601 1679
2601 2239
2601 2687
2601 3053
2602 35
2602 56
2602 358
2602 1569
2602 2492
2603 1494
2603 1870
2603 4488
2604 15
2604 33
2604 97
2604 354
2604 795
2604 813
2604 1784
2604 2399
2604 2843
2604 3225
2604 3608
2604 3969
2604 4414
2604 4942
2605 319
2605 525
2605 802
2605 1487
2605 2421
2605 2730
2605 3196
2605 4972
2606 278
2606 360
2606 1957
2606 2394
2606 4393
2607 153
2607 182
2607 207
2607 674
2607 719
2607 1051
2607 3507
2607 3640
2607 4710
2608 2
2608 3
2608 22
2608 187
2608 449
2608 729
2608 2980
2608 3525
2609 721
2609 1009
2609 3610
2610 2
2610 9
2610 41
2610 57
2610 136
2610 3233
2610 4016
2611 3
2611 9
2611 304
2611 356
2611 545
2611 2293
2612 28
2612 67
2613 144
2613 442
2613 798
2613 1203
2613 1812
2613 4726
2614 400
2615 347
2615 2007
2615 2271
2615 2341
2615 3367
2616 66
2616 75
2616 635
2616 1295
2616 2344
2616 2764
2616 2803
2616 3541
2616 4275
2616 4333
2616 4688
2617 0
2617 2
2617 1499
2617 1577
2617 1974
2617 3751
2618 3
2618 589
2618 666
2618 2355
2618 2391
2618 2529
2618 4011
2619 505
2619 1066
2619 1432
2619 1691
2619 1941
2619 2568
2619 4803
2619 4940
2620 7
2620 65
2620 669
2620 790
2620 2303
2620 3121
2620 3334
2621 25
2621 38
2621 125
2621 212
2621 344
2621 484
2621 860
2621 1340
2621 2082
2621 2791
2621 3210
2621 3277
2621 3536
2621 3845
2622 5
2622 14
2622 17
2622 720
2622 4486
2623 7
2623 35
2623 88
2623 1715
2623 2344
2623 2347
2624 473
2624 1156
2624 1957
2624 2231
2624 2241
2624 3010
2624 3666
2624 3943
2625 4
2625 19
2625 244
2625 372
2625 438
2625 1724
2625 2713
2626 4
2626 135
2626 294
2626 3287
2626 3305
2626 3905
2626 4491
2626 4517
2626 4900
2626 4942
2627 728
2627 1213
2627 1248
2627 1623
2627 2166
2628 35
2628 96
2628 138
2628 153
2628 205
2628 952
2628 2489
2629 397
2629 677
2629 1082
2629 1685
2629 2463
2630 7
2630 134
2630 706
2630 916
2630 1200
2630 1404
2630 1636
2630 1961
2630 3315
2630 4388
2630 4473
2631 10
2631 18
2631 26
2631 63
2631 195
2631 350
2631 995
2631 1751
2631 2844
2632 33
2632 126
2632 1215
2632 1220
2632 2471
2632 3515
2632 3580
2632 3835
2633 348
2633 487
2633 606
2633 1239
2633 1597
2633 3191
2633 3623
2634 171
2634 199
2634 416
2634 629
2634 677
2634 3892
2634 4294
2635 344
2635 397
2635 449
2635 1284
2635 3094
2635 3681
2636 54
2636 267
2636 1480
2636 2681
2637 22
2637 25
2637 110
2637 337
2637 369
2637 2019
2637 4825
2638 181
2638 189
2638 441
2638 1372
2639 6
2639 575
2639 603
2639 1132
2639 1478
2639 1952
2639 4332
2640 31
2640 1520
2640 1803
2640 2371
2640 3177
2640 4530
2641 15
2641 1328
2641 1753
2641 1883
2641 3838
2642 1
2642 3
2642 496
2642 1259
2642 3133
2643 161
2643 467
2644 363
2644 778
2644 1187
2644 1439
2644 2443
2644 2467
2644 2686
2644 3584
2644 3737
2644 4618
2645 2
2645 85
2645 223
2645 292
2645 325
2645 3237
2646 12
2646 14
2646 29
2646 228
2646 472
2646 814
2646 2151
2646 4022
2647 0
2647 2
2647 7
2647 59
2647 816
2647 843
2647 994
2647 2471
2648 8
2648 40
2648 164
2648 285
2648 400
2648 997
2648 1356
2648 2945
2648 4299
2648 4619
2649 10
2649 24
2649 453
2649 519
2649 749
2649 995
2649 2142
2649 2238
2649 3099
2649 3429
2649 3739
2650 162
2650 2458
2650 3038
2650 4056
2651 6
2651 347
2651 522
2651 2383
2651 2795
2651 3725
2652 461
2652 778
2652 1941
2652 2195
2652 3141
2653 2
2653 32
2653 56
2653 94
2653 207
2653 273
2653 1280
2653 1659
2653 2460
2653 2728
2653 3357
2654 64
2654 73
2654 91
2654 107
2654 121
2654 395
2654 515
2654 2420
2655 7
2655 10
2655 13
2655 35
2655 66
2655 1178
2656 24
2656 488
2656 646
2656 1186
2656 1381
2656 2050
2656 3588
2657 17
2657 1040
2657 1502
2657 3447
2658 11
2658 602
2658 1367
2658 2128
2658 2989
2658 3263
2658 3810
2658 4306
2659 6
2659 57
2659 63
2659 484
2659 973
2659 1865
2659 2507
2659 3147
2659 3308
2659 3455
2659 4313
2660 1
2660 12
2660 18
2660 27
2660 500
2660 1225
2660 1328
2660 1593
2660 2348
2660 3784
2660 4340
2661 10
2661 292
2661 621
2661 931
2661 1706
2661 3911
2661 4186
2661 4274
2662 18
2662 113
2662 210
2662 337
2662 1121
2662 2261
2662 3284
2662 3461
2662 4681
2663 29
2663 236
2663 281
2663 328
2663 2475
2663 4497
2663 4931
2664 15
2664 49
2664 130
2664 384
2664 674
2664 962
2664 2000
2664 2789
2664 2859
2664 3286
2664 3666
2665 56
2665 159
2665 476
2665 678
2665 1321
2665 1344
2665 4275
2665 4375
2666 9
2666 174
2666 207
2666 289
2666 337
2666 541
2666 2059
2666 2257
2667 5
2667 71
2667 75
2667 275
2667 664
2667 1489
2667 2900
2667 3197
2668 40
2668 98
2668 426
2668 442
2668 2006
2668 4372
2668 4402
2669 1
2669 35
2669 1262
2669 1394
2669 1830
2669 1856
2669 3239
2669 3320
2669 4783
2670 17
2670 35
2670 106
2670 1129
2670 1550
2670 2123
2670 3196
2670 4137
2671 11
2671 63
2671 262
2671 1360
2671 1636
2671 2019
2671 2272
2672 14
2672 934
2672 1653
2672 2001
2673 10
2673 11
2673 415
2673 632
2673 1131
2673 3391
2673 4947
2674 91
2674 128
2674 1540
2675 13
2675 50
2675 306
2675 823
2675 1652
2675 2112
2675 3166
2675 4395
2675 4490
2676 27
2676 186
2676 244
2676 330
2676 559
2676 2192
2676 3128
2676 3337
2676 3658
2676 3750
2676 4750
2677 344
2677 1181
2677 1333
2678 4
2678 21
2678 36
2678 192
2678 270
2678 794
2678 1183
2678 1624
2678 1837
2678 3139
2678 3219
2678 4539
2679 4
2679 120
2679 409
2679 1424
2679 2838
2679 4577
2679 4862
2680 7
2680 84
2680 91
2680 689
2680 828
2680 2094
2680 3345
2681 103
2681 124
2681 169
2681 1899
2681 2636
2681 3917
2682 2
2682 8
2682 9
2682 10
2682 21
2682 141
2682 177
2682 873
2682 3266
2683 12
2683 96
2683 322
2683 862
2683 1423
2683 1452
2684 91
2684 129
2684 263
2684 587
2684 670
2685 25
2685 289
2685 446
2685 658
2685 1200
2685 1833
2685 2385
2685 3209
2685 3809
2685 4443
2686 215
2686 318
2686 590
2686 1303
2686 2644
2686 3481
2687 0
2687 12
2687 147
2687 193
2687 393
2687 789
2687 2314
2687 2601
2687 2843
2687 2934
2687 3658
2688 79
2688 90
2688 1207
2689 14
2689 972
2689 1249
2689 1313
2689 1482
2689 2063
2689 3313
2690 14
2690 2041
2690 3577
2691 0
2691 16
2691 18
2691 301
2691 2093
2691 2181
2692 100
2692 149
2692 212
2692 713
2692 824
2692 1678
2692 2322
2692 2422
2692 4181
2693 6
2693 407
2693 1521
2693 1717
2693 2416
2693 3026
2693 3891
2693 4636
2693 4687
2694 295
2694 603
2694 641
2694 1040
2694 1140
2694 2280
2695 2
2695 11
2695 19
2695 35
2695 184
2695 237
2695 467
2695 1635
2695 1902
2695 2042
2695 2709
2695 2984
2695 3077
2695 3207
2695 4374
2695 4706
2696 136
2696 166
2696 834
2696 1945
2696 1954
2696 2239
2696 3021
2696 3089
2696 3467
2696 4264
2696 4472
2696 4589
2696 4694
2697 14
2697 96
2697 571
2697 4221
2698 18
2698 237
2698 381
2698 574
2698 910
2698 4136
2699 5
2699 6
2699 11
2699 49
2699 150
2699 172
2699 531
2699 688
2699 766
2699 1488
2700 1
2700 17
2700 663
2700 1501
2700 1545
2700 1752
2700 2536
2701 16
2701 52
2701 89
2701 91
2701 96
2701 603
2701 625
2701 1220
2701 2174
2701 3646
2701 3879
2702 1
2702 74
2702 207
2702 877
2702 1925
2702 3160
2703 59
2703 73
2703 525
2703 3332
2704 2
2704 607
2704 662
2704 1009
2704 1202
2704 1704
2704 1835
2704 3323
2705 174
2705 467
2705 554
2705 964
2705 1928
2705 2545
2705 3837
2705 4941
2706 7
2706 21
2706 336
2706 578
2706 1423
2706 1591
2706 1624
2706 2543
2706 2981
2706 4081
2707 44
2707 557
2707 764
2707 1063
2707 1477
2708 459
2708 795
2708 1362
2708 1370
2708 2271
2709 20
2709 59
2709 101
2709 176
2709 840
2709 842
2709 2353
2709 2695
2709 3697
2709 3753
2709 4570
2709 4700
2710 106
2710 333
2710 1326
2710 1423
2710 1574
2710 2784
2710 3106
2710 3208
2711 106
2711 371
2711 385
2711 1349
2711 2002
2711 3040
2711 3231
2711 4806
2712 505
2712 3371
2713 138
2713 584
2713 645
2713 741
2713 1913
2713 2625
2714 5
2714 117
2714 185
2714 278
2714 2203
2714 2348
2714 4831
2715 6
2715 498
2715 2826
2715 2837
2715 4402
2716 23
2716 155
2716 1203
2716 2112
2716 4591
2717 9
2717 10
2717 13
2717 25
2717 187
2717 541
2717 3161
2717 3208
2717 3411
2718 5
2718 103
2718 265
2718 349
2718 1869
2718 4938
2719 4
2719 881
2719 1282
2719 1476
2719 1895
2720 59
2720 144
2720 166
2720 200
2720 430
2720 783
2720 1568
2720 1833
2720 2058
2720 3011
2720 3649
2721 10
2721 97
2721 179
2721 215
2721 1362
2722 4
2722 11
2722 184
2722 837
2722 1592
2722 2276
2723 16
2723 27
2723 135
2723 345
2723 656
2723 2294
2724 94
2724 827
2724 1142
2724 1770
2725 18
2725 51
2725 74
2725 117
2725 300
2725 370
2725 1054
2725 1991
2725 2565
2725 3194
2725 3355
2725 4325
2725 4413
2726 53
2726 211
2726 834
2726 1102
2726 1801
2726 1859
2726 3689
2727 319
2727 615
2727 631
2727 1192
2727 1338
2727 1440
2727 1904
2727 4677
2728 69
2728 84
2728 324
2728 2528
2728 2653
2728 4437
2729 32
2729 872
2729 1290
2729 2548
2729 2577
2729 3015
2729 4060
2729 4851
2730 28
2730 53
2730 255
2730 398
2730 495
2730 721
2730 882
2730 2605
2730 3552
2730 4638
2731 15
2731 19
2731 515
2731 847
2731 1133
2731 1195
2731 1756
2731 3258
2732 16
2732 114
2732 378
2732 867
2732 971
2732 1190
2732 1877
2732 4020
2733 13
2733 278
2733 413
2733 931
2733 1999
2733 2125
2733 2446
2733 3191
2733 3279
2734 9
2734 22
2734 49
2734 85
2734 160
2734 300
2734 1085
2734 1361
2734 2847
2734 3420
2734 3557
2734 4339
2735 7
2735 9
2735 18
2735 442
2735 502
2735 1492
2735 2005
2735 3088
2735 3507
2735 4135
2735 4251
2735 4319
2735 4992
2736 25
2736 114
2736 598
2736 701
2736 909
2736 4234
2736 4914
2737 83
2737 179
2737 286
2737 1976
2737 2563
2738 4
2738 151
2738 405
2738 570
2738 978
2738 1788
2739 2
2739 12
2739 335
2739 432
2739 548
2739 1024
2739 1668
2739 3661
2739 4336
2739 4917
2740 71
2740 274
2740 299
2740 351
2740 1433
2740 2555
2741 16
2741 126
2741 375
2741 480
2741 692
2741 1115
2741 2047
2741 2227
2741 3003
2741 3143
2741 3628
2741 3896
2741 3986
2742 96
2742 319
2742 952
2742 3031
2742 3660
2743 16
2743 196
2743 242
2743 246
2743 1922
2743 2045
2743 2894
2744 3
2744 19
2744 443
2744 1590
2744 1593
2744 1610
2745 3
2745 758
2745 952
2745 2374
2746 2
2746 284
2746 814
2746 1463
2747 124
2747 157
2747 354
2747 855
2747 2418
2747 3430
2747 4432
2748 14
2748 77
2748 258
2748 496
2748 1052
2748 1183
2748 4088
2748 4321
2749 1248
2749 1911
2750 63
2750 95
2750 260
2750 272
2750 474
2750 898
2750 1913
2750 2401
2750 3746
2750 4739
2750 4760
2751 16
2751 24
2751 174
2751 550
2751 566
2751 743
2751 1306
2751 2107
2751 2432
2751 2759
2751 3192
2751 3514
2752 51
2752 201
2752 1280
2752 1756
2753 24
2753 69
2753 123
2753 187
2753 1103
2753 4936
2754 5
2754 110
2754 153
2754 364
2754 588
2754 1054
2754 1369
2754 1689
2754 3519
2754 3647
2755 37
2755 52
2755 219
2755 328
2755 589
2755 1162
2755 1169
2755 2439
2755 3598
2755 4563
2756 112
2756 1380
2756 1651
2756 1949
2756 2408
2756 3418
2756 4358
2757 15
2757 175
2757 1107
2757 1227
2757 1859
2757 2015
2757 2526
2758 10
2758 83
2758 337
2758 1709
2758 2185
2758 3420
2758 4504
2758 4841
2759 3
2759 87
2759 767
2759 984
2759 996
2759 2143
2759 2751
2759 3592
2759 3683
2759 4199
2759 4584
2759 4806
2759 4872
2760 86
2760 483
2760 555
2760 874
2760 1471
2760 1494
2760 1724
2760 2797
2760 2955
2760 4280
2761 0
2761 82
2761 430
2761 889
2761 1715
2761 4108
2761 4751
2762 195
2762 447
2762 507
2762 683
2762 1569
2762 1597
2762 3056
2763 3
2764 898
2764 1035
2764 2616
2765 9
2765 65
2765 66
2765 106
2765 117
2765 282
2765 309
2765 495
2765 744
2765 1014
2765 2963
2765 3140
2765 3852
2765 3956
2765 4323
2766 20
2766 1160
2766 1162
2766 1571
2766 2330
2766 2417
2766 3159
2766 3668
2766 4305
2766 4553
2766 4851
2767 18
2767 163
2767 1505
2767 1639
2767 4901
2768 12
2768 23
2768 93
2768 554
2768 630
2768 882
2768 1843
2768 2173
2768 2568
2768 2772
2768 4368
2768 4400
2769 323
2769 571
2769 1013
2769 1481
2769 3236
2769 3522
2770 2
2770 5
2770 18
2770 120
2770 308
2770 769
2770 1946
2770 3353
2770 3908
2771 125
2771 982
2771 1287
2771 2321
2771 2481
2771 4707
2772 17
2772 21
2772 301
2772 362
2772 1540
2772 1759
2772 1881
2772 2768
2772 3239
2772 3642
2773 9
2773 179
2773 309
2773 612
2773 614
2774 17
2774 70
2774 186
2775 4
2775 161
2775 226
2775 595
2775 874
2775 1788
2775 2326
2775 3710
2775 4967
2776 16
2776 20
2776 33
2776 69
2776 456
2776 762
2776 2886
2777 31
2777 207
2777 759
2777 852
2777 1250
2777 2063
2777 2348
2777 2557
2777 2831
2777 3035
2777 3965
2778 19
2778 35
2778 469
2778 624
2778 1026
2778 4110
2779 77
2779 276
2779 489
2779 1801
2779 1895
2780 0
2780 1
2780 9
2780 193
2780 520
2780 1007
2780 2141
2781 58
2781 506
2781 1314
2781 3312
2782 104
2782 131
2782 153
2782 457
2782 502
2782 876
2782 3117
2782 3733
2782 4346
2782 4724
2782 4816
2783 104
2783 749
2783 916
2783 2105
2783 2435
2783 3226
2784 25
2784 78
2784 250
2784 474
2784 606
2784 2335
2784 2710
2784 3664
2785 0
2785 60
2785 128
2785 1752
2786 0
2786 781
2786 3618
2787 18
2787 23
2787 33
2787 87
2787 162
2787 654
2787 1173
2787 1535
2787 4292
2788 716
2788 2505
2788 2950
2788 3287
2789 57
2789 108
2789 176
2789 369
2789 1216
2789 2664
2789 2790
2790 17
2790 40
2790 84
2790 251
2790 520
2790 816
2790 2316
2790 2498
2790 2789
2790 3999
2790 4345
2790 4412
2791 52
2791 341
2791 1343
2791 2621
2791 3078
2792 111
2792 293
2792 384
2793 28
2793 159
2793 184
2793 855
2793 1070
2793 3792
2793 4871
2794 105
2794 211
2794 566
2794 842
2794 1340
2794 1383
2794 3518
2794 3564
2794 3984
2794 4980
2795 1
2795 36
2795 1101
2795 1231
2795 1434
2795 2651
2795 4319
2796 33
2796 36
2796 60
2796 154
2796 278
2796 2239
2796 2450
2796 3001
2796 3292
2797 19
2797 53
2797 336
2797 533
2797 2760
2798 2
2798 9
2798 685
2798 1965
2798 3853
2799 6
2799 124
2799 329
2799 438
2799 1701
2799 3109
2799 4089
2800 72
2800 468
2800 933
2800 1833
2800 1998
2800 2820
2800 3502
2801 0
2801 32
2801 65
2801 112
2801 220
2801 282
2801 399
2801 955
2801 3486
2802 18
2802 52
2802 169
2802 426
2802 548
2802 1421
2802 1556
2802 4230
2803 23
2803 430
2803 1689
2803 1954
2803 2577
2803 2616
2803 4206
2803 4649
2803 4770
2804 12
2804 498
2804 916
2804 1578
2804 1682
2804 2326
2804 2522
2805 6
2805 25
2805 170
2805 992
2805 1116
2805 1546
2806 12
2806 51
2806 295
2806 517
2806 926
2806 3010
2806 3590
2806 3746
2807 7
2807 38
2807 86
2807 177
2807 542
2807 2278
2807 2374
2807 3547
2808 5
2808 10
2808 1379
2808 2293
2808 3692
2808 4610
2809 128
2809 530
2809 547
2809 940
2809 2886
2809 3054
2809 3403
2810 23
2810 64
2810 106
2810 252
2810 679
2810 905
2810 968
2810 1413
2810 2008
2810 3070
2810 4576
2811 4
2811 10
2811 22
2811 176
2811 377
2811 721
2811 1077
2811 2869
2811 4128
2811 4447
2811 4763
2811 4819
2811 4910
2812 87
2812 96
2812 220
2812 319
2812 407
2812 1248
2812 2982
2812 3367
2812 3915
2813 2
2813 398
2813 517
2813 566
2813 1821
2813 2122
2814 251
2814 430
2814 1345
2814 4257
2814 4468
2815 56
2815 379
2815 1042
2815 1083
2815 2590
2816 18
2816 195
2816 642
2816 874
2816 2195
2816 2319
2816 3330
2816 4845
2817 11
2817 28
2817 912
2817 1876
2817 2863
2817 4068
2818 16
2818 27
2818 691
2818 1652
2818 2315
2819 1
2819 438
2819 1351
2819 1572
2819 1610
2820 6
2820 100
2820 852
2820 1192
2820 2460
2820 2800
2820 3247
2820 3824
2821 3
2821 8
2821 10
2821 401
2821 962
2821 2034
2822 233
2822 349
2822 934
2822 1972
2822 2378
2822 3877
2823 0
2823 8
2823 110
2823 433
2823 599
2823 1112
2823 2394
2823 2431
2823 3020
2823 3991
2823 4709
2824 19
2824 33
2824 326
2824 634
2824 682
2824 740
2824 1358
2824 2054
2824 3665
2824 4548
2825 10
2825 257
2825 449
2825 862
2825 1752
2825 3182
2825 4815
2826 9
2826 2499
2826 2715
2826 3720
2827 9
2827 63
2827 329
2827 627
2827 1371
2827 2384
2827 2949
2827 3351
2827 4052
2828 6
2828 7
2828 1593
2829 16
2829 312
2829 615
2829 1714
2829 4930
2830 13
2830 29
2830 32
2830 33
2830 57
2830 89
2830 139
2830 705
2830 2025
2830 3147
2830 3240
2831 11
2831 355
2831 621
2831 771
2831 1770
2831 2777
2832 17
2832 166
2832 225
2832 777
2832 1371
2832 1497
2832 1880
2832 2452
2832 3050
2832 4170
2832 4996
2833 71
2833 128
2833 150
2833 1165
2833 1189
2833 1202
2833 2519
2833 3252
2834 6
2834 43
2834 96
2834 998
2834 1487
2834 1897
2834 3478
2834 3826
2834 4641
2834 4912
2835 0
2835 18
2835 160
2835 169
2835 453
2835 464
2835 1603
2835 1745
2835 4188
2836 23
2836 27
2836 56
2836 85
2836 1045
2836 4837
2837 5
2837 356
2837 656
2837 2301
2837 2715
2837 3813
2837 4033
2838 888
2838 1611
2838 2679
2838 3771
2838 4635
2839 5
2839 25
2839 76
2839 287
2839 662
2839 666
2839 2516
2839 3593
2840 63
2840 1062
2840 1207
2840 1352
2840 1744
2840 4088
2841 9
2841 10
2841 25
2841 98
2841 308
2841 1318
2841 2195
2841 3829
2841 4835
2842 2
2842 13
2842 322
2842 741
2842 1210
2842 1800
2842 3362
2843 2
2843 40
2843 323
2843 324
2843 729
2843 2310
2843 2604
2843 2687
2843 3515
2844 28
2844 40
2844 74
2844 149
2844 321
2844 1620
2844 2631
2844 3795
2844 4842
2845 7
2845 128
2845 622
2845 1263
2845 1593
2845 2562
2846 89
2846 151
2846 324
2846 570
2846 724
2846 885
2846 1920
2846 3424
2846 4721
2847 489
2847 1114
2847 2473
2847 2734
2847 4228
2848 232
2848 296
2848 490
2848 533
2848 1545
2848 1704
2848 2001
2848 2058
2848 3875
2849 52
2849 181
2849 568
2849 942
2849 970
2849 1620
2849 1997
2850 118
2850 527
2850 701
2850 1101
2850 1591
2850 1959
2851 31
2851 32
2851 3188
2852 8
2852 16
2852 35
2852 185
2852 292
2852 831
2852 3652
2852 4540
2853 25
2853 203
2853 298
2853 889
2854 12
2854 68
2854 70
2854 107
2854 1192
2854 1630
2854 3047
2854 3376
2854 3471
2854 3797
2855 46
2855 98
2855 162
2855 397
2855 775
2855 2590
2855 3375
2855 4051
2855 4142
2856 0
2856 4
2856 34
2856 212
2856 650
2856 1362
2856 1566
2856 1969
2856 2171
2856 3258
2856 4614
2857 173
2857 694
2857 774
2857 1011
2857 1208
2857 1827
2857 2107
2857 2911
2857 3166
2857 3185
2857 3394
2858 10
2858 885
2858 1277
2858 2595
2858 3977
2859 7
2859 475
2859 482
2859 2577
2859 2664
2859 3490
2859 4041
2860 14
2860 177
2860 305
2860 1328
2860 1469
2860 3685
2860 4056
2861 778
2861 1073
2861 1285
2861 1813
2861 1866
2861 3018
2861 3120
2861 3150
2861 3326
2862 44
2862 151
2862 194
2862 462
2862 2241
2863 0
2863 17
2863 125
2863 522
2863 855
2863 960
2863 1314
2863 1835
2863 2139
2863 2817
2863 3828
2863 4152
2863 4305
2863 4584
2863 4934
2864 35
2864 50
2864 756
2864 984
2864 1655
2864 2147
2864 2218
2864 2421
2864 3186
2865 12
2865 63
2865 103
2866 14
2866 21
2866 83
2866 194
2866 1173
2866 1861
2866 1920
2866 1994
2866 2583
2866 3702
2866 3942
2866 4413
2867 5
2867 89
2867 117
2867 147
2867 276
2867 928
2867 1933
2867 2913
2867 3128
2868 1
2868 11
2868 93
2868 96
2868 385
2868 707
2868 3049
2869 52
2869 1134
2869 1947
2869 2233
2869 2811
2870 14
2870 15
2870 104
2870 311
2870 949
2870 1474
2870 1621
2870 3492
2871 25
2871 163
2871 292
2871 782
2871 1816
2871 3147
2872 51
2872 234
2872 847
2872 909
2872 2516
2873 10
2873 24
2873 756
2873 968
2873 1107
2873 1120
2873 2068
2873 2918
2873 3891
2873 3961
2873 4028
2873 4697
2873 4736
2874 14
2874 387
2874 404
2874 1210
2874 1755
2874 4456
2874 4989
2875 0
2875 63
2875 196
2875 1171
2876 26
2876 637
2876 934
2877 0
2877 2
2877 120
2877 251
2877 579
2877 1013
2877 1693
2877 2187
2877 4857
2878 26
2878 381
2878 754
2878 1284
2878 1456
2878 4025
2879 219
2879 741
2879 1374
2879 2262
2879 2374
2879 3132
2879 3865
2880 1
2880 4
2880 130
2880 182
2880 598
2880 1984
2880 4434
2880 4613
2881 24
2881 55
2881 102
2881 439
2881 3092
2882 14
2882 121
2882 142
2882 988
2882 1423
2882 1835
2882 3564
2883 7
2883 14
2883 15
2883 27
2883 420
2883 464
2883 490
2883 575
2883 4676
2884 12
2884 38
2884 39
2884 880
2884 1052
2884 1441
2884 1947
2884 2199
2884 4054
2885 2
2885 9
2885 319
2885 916
2885 1194
2885 1234
2885 1279
2885 3225
2885 3625
2886 0
2886 3
2886 11
2886 142
2886 148
2886 1550
2886 2559
2886 2776
2886 2809
2886 3743
2886 4590
2887 10
2887 18
2888 7
2888 264
2888 1203
2888 1821
2889 319
2889 1201
2889 1812
2889 2582
2889 3868
2889 4853
2890 25
2890 58
2890 1081
2890 1818
2890 2957
2890 3907
2890 4626
2891 272
2891 288
2891 348
2891 1101
2891 1174
2891 2343
2891 3966
2891 4079
2891 4264
2891 4296
2891 4402
2892 51
2892 2596
2893 19
2893 29
2893 70
2893 187
2893 293
2893 353
2893 759
2893 3809
2894 160
2894 450
2894 592
2894 2743
2895 10
2895 18
2895 58
2895 69
2895 468
2895 1467
2896 100
2896 1220
2896 2020
2896 2469
2897 3
2897 334
2897 546
2897 1668
2897 4469
2898 2
2898 7
2898 224
2898 749
2898 935
2898 1369
2898 1725
2898 1951
2898 2120
2898 2151
2898 2246
2898 2273
2898 3175
2898 3393
2898 3836
2899 67
2899 68
2899 86
2899 129
2899 371
2899 472
2899 762
2899 885
2899 1072
2899 1135
2899 3340
2899 3393
2899 3426
2899 3526
2899 3721
2899 3938
2899 3981
2899 4367
2899 4376
2899 4662
2900 3
2900 126
2900 525
2900 577
2900 741
2900 1547
2900 2446
2900 2667
2900 2926
2900 3358
2900 3447
2901 7
2901 787
2901 847
2901 1541
2901 2159
2901 4142
2902 9
2902 666
2902 883
2903 9
2903 11
2903 124
2903 460
2903 907
2903 1450
2903 2988
2903 3266
2903 3645
2904 56
2904 190
2904 279
2904 672
2904 2211
2904 3198
2905 19
2905 182
2905 191
2905 262
2905 661
2905 1173
2905 1592
2905 2543
2905 3595
2905 3988
2905 4887
2906 18
2906 43
2906 44
2906 123
2906 193
2906 227
2906 338
2906 2140
2906 3678
2906 3874
2906 3966
2906 4077
2907 1
2907 18
2907 91
2907 116
2907 2450
2907 3686
2907 4112
2908 409
2908 1100
2908 1340
2909 69
2909 99
2909 105
2909 1204
2909 4976
2910 6
2910 41
2910 398
2910 956
2910 1291
2910 1340
2910 1571
2910 1897
2910 4109
2911 4
2911 6
2911 185
2911 1428
2911 2857
2911 4497
2912 13
2912 340
2912 572
2912 1195
2912 3397
2912 3681
2912 4371
2913 308
2913 2135
2913 2867
2914 7
2914 176
2914 295
2914 577
2914 628
2914 4962
2915 171
2915 265
2915 773
2915 2461
2915 3036
2916 56
2916 160
2916 829
2916 1135
2916 1581
2916 1665
2916 2426
2916 3475
2916 4140
2917 7
2917 2384
2918 8
2918 10
2918 327
2918 1192
2918 1819
2918 2873
2918 3619
2919 1
2919 29
2919 249
2919 944
2919 3421
2919 3903
2919 4977
2920 4
2920 44
2920 273
2920 326
2920 415
2920 2953
2920 3516
2921 0
2921 1
2921 35
2921 211
2921 282
2921 2171
2921 4467
2922 24
2922 64
2922 225
2922 985
2922 3265
2922 3558
2923 10
2923 162
2923 442
2923 612
2923 732
2923 1584
2923 2487
2923 2939
2924 7
2924 43
2924 60
2924 66
2924 69
2924 252
2924 1678
2924 3435
2924 3879
2924 4200
2924 4749
2924 4852
2925 16
2925 179
2925 307
2925 397
2925 587
2925 648
2925 1818
2925 2279
2926 7
2926 8
2926 509
2926 1528
2926 1628
2926 1973
2926 2900
2926 3478
2926 3607
2926 4051
2927 18
2927 134
2927 418
2928 2
2928 131
2928 163
2928 720
2928 1239
2928 1417
2928 1902
2928 2575
2929 54
2929 306
2929 746
2929 837
2929 1487
2929 1537
2929 1899
2930 118
2930 157
2930 258
2930 356
2930 923
2930 952
2931 2
2931 91
2931 649
2931 1503
2931 2985
2932 881
2932 910
2932 2093
2933 479
2933 600
2933 1987
2933 2543
2933 4074
2933 4337
2934 218
2934 860
2934 1036
2934 1213
2934 2000
2934 2687
2934 4172
2935 23
2935 170
2935 188
2935 328
2935 1535
2935 1766
2935 2431
2935 4175
2936 25
2936 721
2936 807
2936 1124
2936 1180
2936 2243
2936 2537
2937 289
2937 296
2937 334
2937 1169
2937 1883
2937 2061
2937 4227
2938 3
2938 5
2938 108
2938 824
2938 1277
2938 1728
2938 2959
2938 4747
2939 16
2939 23
2939 91
2939 264
2939 273
2939 668
2939 2154
2939 2923
2939 4332
2939 4372
2939 4940
2940 7
2940 18
2940 60
2940 674
2940 713
2941 25
2941 353
2941 380
2941 668
2941 2567
2941 3137
2942 17
2942 179
2942 345
2942 456
2942 766
2942 1770
2942 3436
2943 547
2943 1321
2943 1738
2943 1962
2943 2435
2943 3720
2944 19
2944 712
2944 716
2944 1005
2944 1497
2945 14
2945 51
2945 177
2945 289
2945 2213
2945 2648
2946 8
2946 27
2946 28
2946 30
2946 246
2946 634
2946 641
2946 1085
2946 1471
2946 3070
2946 3361
2946 3711
2946 4365
2946 4483
2947 8
2947 91
2947 572
2947 1340
2947 1406
2947 4999
2948 189
2948 262
2948 270
2949 32
2949 199
2949 243
2949 1128
2949 1519
2949 1845
2949 2827
2949 4307
2950 19
2950 456
2950 695
2950 876
2950 1269
2950 1777
2950 2788
2950 4151
2951 4
2951 19
2951 1801
2951 4147
2952 31
2952 69
2952 344
2952 399
2952 1553
2952 4022
2953 5
2953 10
2953 366
2953 903
2953 948
2953 1535
2953 1902
2953 2920
2953 4194
2953 4258
2953 4323
2954 32
2954 251
2954 314
2954 566
2954 715
2954 1296
2954 3159
2954 3260
2955 18
2955 166
2955 490
2955 623
2955 1691
2955 1948
2955 2760
2955 3264
2955 3385
2955 3895
2956 1
2956 5
2956 16
2956 38
2956 131
2956 279
2957 71
2957 99
2957 273
2957 325
2957 512
2957 774
2957 1042
2957 1607
2957 2890
2957 3301
2957 4070
2957 4256
2958 17
2958 451
2958 2165
2959 852
2959 2394
2959 2938
2960 46
2960 61
2960 459
2960 679
2960 699
2961 9
2961 660
2961 1706
2961 2187
2961 2206
2961 3271
2962 122
2962 262
2962 733
2962 1014
2962 2021
2962 2463
2962 4102
2962 4971
2963 12
2963 1230
2963 2019
2963 2048
2963 2105
2963 2765
2964 0
2964 17
2964 91
2964 936
2964 1962
2964 2123
2964 3140
2964 3390
2965 3
2965 278
2965 986
2965 1178
2965 1767
2965 3739
2965 4315
2966 4
2966 4474
2967 308
2967 383
2967 1306
2967 1440
2967 1632
2967 2361
2967 4116
2968 8
2968 16
2968 71
2968 285
2968 289
2968 336
2968 541
2968 703
2968 1096
2968 1309
2968 3204
2968 3211
2968 3311
2968 3388
2968 3529
2968 3815
2968 4740
2969 144
2969 404
2969 1131
2969 1328
2969 1494
2969 3192
2969 4587
2970 8
2970 9
2970 88
2970 678
2970 1347
2970 1921
2970 1931
2970 2378
2970 4008
2971 21
2971 257
2971 430
2971 1772
2971 2217
2971 3323
2972 2
2972 9
2972 14
2972 23
2972 151
2972 258
2972 283
2972 648
2972 2023
2972 4118
2973 7
2973 541
2973 677
2973 1129
2973 1512
2973 1541
2973 2979
2973 3399
2973 4350
2974 10
2974 940
2974 4891
2975 2
2975 6
2975 83
2975 421
2975 564
2975 1075
2975 1601
2975 4668
2976 18
2976 42
2976 691
2976 2166
2977 5
2977 14
2977 117
2977 2444
2977 3598
2977 4240
2978 8
2978 134
2978 148
2978 150
2978 202
2978 208
2978 665
2979 164
2979 168
2979 237
2979 1069
2979 1521
2979 2587
2979 2973
2980 142
2980 390
2980 506
2980 1309
2980 1734
2980 2608
2981 192
2981 299
2981 995
2981 1087
2981 2706
2981 4837
2981 4904
2982 19
2982 94
2982 151
2982 157
2982 290
2982 467
2982 2812
2982 4070
2983 18
2983 207
2983 261
2983 360
2983 443
2983 566
2983 761
2983 1346
2983 4169
2983 4853
2984 10
2984 71
2984 273
2984 325
2984 727
2984 1226
2984 1251
2984 2695
2984 3535
2984 4297
2985 2
2985 8
2985 310
2985 1040
2985 1757
2985 2931
2985 3425
2985 3637
2985 4695
2985 4791
2986 1632
2987 26
2987 175
2987 874
2987 1102
2987 1140
2987 2132
2988 17
2988 28
2988 175
2988 506
2988 608
2988 800
2988 960
2988 2903
2988 4516
2988 4604
2989 109
2989 591
2989 1535
2989 2197
2989 2463
2989 2658
2989 3871
2989 3923
2989 4369
2990 3
2990 52
2990 461
2990 646
2990 2499
2991 4
2991 747
2991 2323
2991 4515
2992 2
2992 6
2992 8
2992 17
2992 493
2992 620
2992 692
2992 1644
2992 3101
2992 4001
2993 7
2993 1350
2993 1627
2993 1942
2994 6
2994 497
2995 0
2995 3
2995 8
2995 270
2995 322
2995 1592
2995 1765
2995 1977
2995 2432
2995 3034
2995 3103
2995 3765
2995 4236
2995 4291
2995 4354
2995 4475
2995 4713
2995 4741
2995 4908
2996 8
2996 23
2996 1263
2996 1430
2996 1444
2996 1736
2997 124
2997 260
2997 683
2997 1088
2998 150
2998 353
2998 602
2998 877
2998 909
2998 1127
2998 2385
2998 3788
2999 7
2999 189
2999 889
3000 12
3000 424
3000 878
3000 1243
3001 19
3001 166
3001 335
3001 443
3001 1951
3001 2796
3001 3746
3001 3934
3002 7
3002 148
3002 327
3002 360
3002 684
3002 1456
3002 2488
3003 66
3003 278
3003 485
3003 681
3003 1423
3003 1718
3003 2741
3003 3291
3003 4910
3003 4983
3004 12
3004 15
3004 111
3004 827
3004 4244
3004 4549
3005 8
3005 160
3005 344
3005 414
3005 968
3005 1473
3005 1502
3005 1830
3005 1960
3005 2461
3005 3346
3005 4515
3005 4678
3006 16
3006 54
3006 82
3006 222
3006 309
3006 825
3006 2022
3006 4080
3007 35
3007 69
3007 144
3007 985
3007 1635
3007 1804
3007 4322
3007 4672
3008 93
3008 662
3008 909
3008 1796
3008 2040
3008 2372
3008 3844
3008 4795
3009 14
3009 66
3009 438
3009 1220
3009 2346
3009 4513
3010 4
3010 10
3010 11
3010 102
3010 160
3010 604
3010 1722
3010 2624
3010 2806
3011 2
3011 4
3011 144
3011 1714
3011 2720
3011 4053
3012 0
3012 70
3012 702
3012 2060
3013 10
3013 360
3013 2086
3013 2450
3014 3
3014 17
3014 847
3014 894
3014 1875
3014 2370
3014 2405
3014 2545
3014 3904
3014 4646
3015 0
3015 11
3015 17
3015 151
3015 297
3015 1202
3015 2729
3016 15
3016 41
3016 834
3016 1832
3016 2081
3016 2451
3016 4642
3016 4643
3017 0
3017 16
3017 27
3017 99
3017 179
3017 741
3017 1189
3017 1296
3017 3071
3018 2
3018 148
3018 322
3018 325
3018 951
3018 985
3018 1183
3018 2171
3018 2861
3018 3732
3018 4129
3018 4404
3018 4406
3018 4830
3019 7
3019 9
3019 14
3019 33
3019 59
3019 103
3019 310
3019 1395
3019 1818
3020 19
3020 23
3020 79
3020 135
3020 336
3020 344
3020 1279
3020 1945
3020 2212
3020 2300
3020 2823
3020 3273
3021 0
3021 280
3021 347
3021 1959
3021 2217
3021 2696
3021 3815
3022 19
3022 96
3022 677
3022 1845
3022 2268
3023 4
3023 18
3023 27
3023 42
3023 283
3023 577
3023 1632
3023 1885
3023 3456
3023 4581
3023 4830
3024 2
3024 232
3024 1067
3024 1210
3024 1275
3024 2109
3024 3638
3024 4955
3025 1
3025 4
3025 16
3025 90
3025 180
3025 342
3025 1065
3025 2002
3026 62
3026 210
3026 462
3026 911
3026 2366
3026 2460
3026 2468
3026 2693
3026 3990
3026 4422
3026 4523
3027 9
3027 1101
3027 1410
3027 1861
3027 2492
3027 3869
3028 191
3028 229
3028 653
3028 1919
3028 2292
3028 3348
3028 3582
3028 4439
3028 4799
3029 2
3029 283
3029 460
3029 813
3029 943
3029 1304
3029 2039
3029 2044
3029 3107
3029 3329
3029 3460
3029 4633
3030 1
3030 6
3030 95
3030 142
3030 803
3030 957
3030 2000
3030 3047
3031 35
3031 86
3031 96
3031 120
3031 791
3031 1346
3031 2452
3031 2742
3032 2
3032 152
3032 258
3032 415
3032 525
3032 1530
3032 3891
3032 4064
3033 187
3033 605
3033 1210
3034 9
3034 16
3034 1910
3034 2016
3034 2995
3034 3039
3034 3681
3034 3997
3035 13
3035 14
3035 852
3035 908
3035 1418
3035 2208
3035 2777
3035 4512
3036 7
3036 110
3036 868
3036 1745
3036 2915
3037 391
3037 814
3037 846
3037 928
3037 3112
3037 3331
3037 3733
3037 3966
3037 4540
3038 79
3038 138
3038 285
3038 597
3038 1213
3038 1317
3038 2497
3038 2650
3038 3698
3039 53
3039 245
3039 1034
3039 1063
3039 2368
3039 3034
3039 3953
3039 3972
3040 379
3040 485
3040 515
3040 1230
3040 2711
3040 3403
3040 4849
3041 0
3041 28
3041 32
3041 88
3041 330
3041 500
3041 524
3041 989
3041 3355
3041 3822
3041 4141
3041 4351
3041 4573
3041 4925
3042 1192
3042 1232
3042 1595
3043 10
3043 195
3043 210
3043 701
3043 939
3043 3941
3043 4402
3044 17
3044 19
3044 32
3044 599
3044 1618
3044 1849
3044 3605
3045 36
3045 949
3045 2456
3046 81
3046 258
3046 512
3046 1677
3046 2401
3046 3420
3046 4355
3046 4595
3047 561
3047 658
3047 701
3047 797
3047 996
3047 1394
3047 2854
3047 3030
3047 3409
3047 4653
3047 4761
3047 4986
3048 139
3048 640
3048 648
3048 879
3048 1056
3048 1235
3048 1285
3048 1794
3048 2146
3048 3187
3048 3207
3048 4696
3049 555
3049 2252
3049 2868
3049 3350
3049 4137
3049 4327
3049 4364
3049 4558
3049 4613
3049 4969
3050 0
3050 7
3050 66
3050 299
3050 326
3050 333
3050 731
3050 922
3050 1423
3050 2832
3051 6
3051 8
3051 13
3051 53
3051 98
3051 136
3051 154
3051 642
3051 947
3051 1312
3051 4578
3052 7
3052 57
3052 214
3052 228
3052 3439
3052 4770
3053 3
3053 25
3053 1168
3053 1490
3053 2601
3053 3278
3053 4183
3053 4378
3053 4413
3053 4784
3054 9
3054 10
3054 334
3054 475
3054 504
3054 2809
3055 278
3055 395
3055 797
3055 2229
3056 0
3056 356
3056 868
3056 890
3056 2211
3056 2588
3056 2762
3057 16
3057 33
3057 676
3057 823
3057 1523
3057 4423
3058 5
3058 6
3058 354
3058 791
3058 1987
3058 2408
3059 79
3059 101
3059 556
3059 721
3059 2007
3059 2109
3059 2498
3060 8
3060 63
3060 296
3060 4249
3060 4385
3061 1693
3062 6
3062 285
3062 2326
3062 2466
3062 3436
3063 551
3063 1260
3063 2247
3063 2463
3063 4638
3064 91
3064 212
3064 732
3064 901
3064 1854
3064 1876
3064 3341
3065 2
3065 12
3065 39
3065 953
3065 1237
3065 2272
3065 4578
3065 4748
3066 0
3066 11
3066 854
3066 1241
3066 1767
3066 2243
3066 4476
3066 4934
3067 25
3067 166
3067 562
3067 2496
3067 2577
3067 4688
3067 4969
3068 149
3068 310
3068 485
3068 1018
3068 1517
3068 1893
3068 2384
3068 4452
3068 4643
3068 4754
3069 66
3069 114
3069 154
3069 385
3069 386
3069 3641
3070 176
3070 244
3070 1124
3070 1150
3070 1670
3070 1887
3070 2002
3070 2810
3070 2946
3070 3470
3070 3918
3070 4883
3071 25
3071 84
3071 405
3071 415
3071 639
3071 942
3071 1015
3071 3017
3071 3949
3071 4557
3071 4807
3072 95
3072 307
3072 356
3072 515
3072 1268
3072 1675
3072 2052
3072 4815
3073 12
3073 38
3073 65
3073 95
3073 100
3073 1198
3073 2392
3073 3078
3074 2
3074 17
3074 674
3074 1930
3074 2483
3074 4382
3075 27
3075 301
3075 827
3075 1355
3075 3705
3076 344
3076 769
3077 56
3077 1262
3077 2695
3078 2
3078 8
3078 12
3078 18
3078 60
3078 97
3078 2593
3078 2791
3078 3073
3078 3215
3078 3348
3078 3709
3078 4299
3079 8
3079 117
3079 214
3079 451
3079 495
3079 748
3079 4931
3080 58
3080 244
3080 574
3080 1215
3080 1731
3080 2106
3081 21
3081 740
3081 1536
3081 1546
3081 3615
3082 19
3082 38
3082 144
3082 270
3082 596
3082 663
3082 1433
3083 791
3083 2489
3083 2559
3084 17
3084 230
3084 1437
3084 3211
3084 3392
3084 4218
3084 4697
3085 189
3085 551
3085 566
3085 633
3085 911
3085 1537
3085 1576
3085 2530
3085 3303
3085 4292
3085 4422
3086 395
3086 690
3086 1654
3086 1869
3086 1936
3086 3132
3087 45
3087 86
3087 315
3087 600
3087 1013
3087 1119
3087 4476
3088 18
3088 38
3088 735
3088 1329
3088 1340
3088 2735
3088 3563
3088 4609
3088 4866
3089 62
3089 64
3089 133
3089 1965
3089 2162
3089 2696
3089 4691
3090 8
3090 26
3090 104
3090 815
3090 1598
3090 1657
3090 1696
3090 1894
3090 3705
3090 4418
3091 4
3091 264
3091 446
3091 1479
3091 2483
3091 4705
3092 3
3092 114
3092 285
3092 326
3092 341
3092 740
3092 749
3092 1275
3092 2881
3093 38
3093 139
3093 394
3093 1456
3093 1555
3094 14
3094 144
3094 416
3094 820
3094 1727
3094 2635
3094 3627
3095 520
3095 524
3095 681
3095 1129
3095 1255
3095 1648
3095 1894
3095 2353
3095 4592
3096 57
3096 60
3096 96
3096 446
3096 575
3096 894
3096 939
3096 1284
3096 1774
3097 32
3097 591
3097 1378
3097 3339
3098 10
3098 97
3098 125
3098 632
3098 989
3098 1106
3098 3814
3098 4018
3098 4398
3098 4495
3098 4608
3099 601
3099 2570
3099 2649
3099 4213
3099 4636
3100 0
3100 181
3100 522
3100 976
3100 1069
3100 1323
3100 1824
3100 3904
3100 4712
3101 2
3101 88
3101 264
3101 326
3101 495
3101 2486
3101 2992
3101 3406
3102 2
3102 4
3102 6
3102 75
3102 300
3102 781
3102 1456
3102 4939
3103 1
3103 4
3103 114
3103 138
3103 976
3103 1602
3103 2022
3103 2995
3103 4042
3104 173
3104 467
3104 924
3104 1114
3105 0
3105 35
3105 88
3105 193
3105 569
3105 895
3105 1569
3105 2232
3105 3607
3105 4333
3106 8
3106 25
3106 35
3106 869
3106 1362
3106 2710
3107 95
3107 347
3107 449
3107 709
3107 861
3107 1546
3107 3029
3107 3327
3107 4210
3107 4455
3107 4978
3109 14
3109 1884
3109 2216
3109 2799
3110 44
3110 191
3110 214
3110 264
3110 544
3110 828
3110 896
3111 16
3111 773
3111 829
3111 1424
3112 1
3112 11
3112 724
3112 1107
3112 3037
3113 21
3113 658
3113 3855
3114 49
3114 164
3114 418
3114 604
3114 1346
3114 4127
3115 8
3115 273
3115 449
3115 847
3115 2081
3115 3450
3115 3478
3115 3714
3115 4429
3116 1183
3116 1693
3116 1790
3116 2584
3116 4012
3116 4838
3117 3
3117 599
3117 2782
3117 4952
3118 209
3118 526
3119 0
3119 2
3119 225
3119 263
3119 545
3119 749
3119 2243
3119 4009
3120 92
3120 286
3120 501
3120 2861
3121 10
3121 13
3121 18
3121 550
3121 818
3121 1338
3121 2019
3121 2026
3121 2620
3121 3289
3121 4479
3122 219
3122 262
3123 60
3123 65
3123 234
3123 745
3123 1575
3123 4344
3124 10
3124 262
3124 430
3124 898
3124 1011
3124 1584
3124 2460
3124 4032
3124 4737
3124 4973
3125 59
3125 1278
3125 1353
3125 1404
3125 3550
3125 3896
3125 4551
3126 6
3126 120
3126 127
3126 442
3126 679
3126 1619
3126 3955
3127 2
3127 251
3127 520
3127 956
3127 1092
3127 1193
3127 2508
3127 2597
3127 3367
3127 4724
3128 4
3128 51
3128 1264
3128 1632
3128 2676
3128 2867
3128 3883
3129 2059
3130 21
3130 86
3130 130
3130 285
3130 665
3130 1278
3131 57
3131 442
3131 511
3132 11
3132 816
3132 2879
3132 3086
3132 3677
3133 14
3133 186
3133 309
3133 2052
3133 2156
3133 2642
3133 3451
3133 4979
3134 348
3134 1894
3135 16
3135 68
3135 724
3135 951
3135 1057
3135 1127
3135 4135
3136 144
3136 284
3136 621
3136 1144
3136 1164
3136 3369
3137 44
3137 409
3137 1652
3137 1721
3137 1767
3137 1903
3137 2229
3137 2941
3137 3151
3137 3980
3137 4400
3138 105
3138 189
3138 464
3138 1266
3138 2166
3138 2378
3138 2470
3138 3640
3138 4367
3139 10
3139 60
3139 220
3139 480
3139 589
3139 1189
3139 1618
3139 1636
3139 2475
3139 2678
3139 3879
3139 4137
3140 589
3140 1324
3140 2765
3140 2964
3140 3615
3140 3901
3140 4512
3141 145
3141 745
3141 1806
3141 2652
3142 14
3142 187
3142 334
3142 679
3142 763
3142 972
3142 983
3142 3325
3143 52
3143 251
3143 441
3143 934
3143 1014
3143 1363
3143 2208
3143 2741
3143 4046
3144 2
3144 12
3144 26
3144 73
3144 1508
3144 2223
3144 2575
3144 4185
3144 4882
3145 11
3145 38
3145 242
3145 334
3145 344
3145 1429
3145 1920
3145 2059
3145 3463
3145 3949
3145 4434
3145 4652
3146 3
3146 179
3146 214
3146 1317
3147 186
3147 414
3147 1307
3147 2659
3147 2830
3147 2871
3147 4315
3147 4411
3148 5
3148 163
3148 761
3148 1457
3148 1658
3148 4225
3148 4638
3149 20
3149 564
3149 3763
3149 4354
3149 4833
3150 3
3150 26
3150 148
3150 522
3150 585
3150 602
3150 674
3150 748
3150 2861
3150 3882
3150 4079
3151 84
3151 442
3151 749
3151 1008
3151 1854
3151 3137
3151 3595
3152 144
3152 809
3153 23
3153 770
3153 1326
3153 1520
3153 1740
3153 4630
3154 2
3154 15
3154 387
3154 847
3154 1073
3154 3586
3155 124
3155 537
3156 16
3156 419
3156 782
3156 1087
3156 1959
3156 4135
3157 30
3157 327
3157 940
3157 1340
3157 1625
3157 3225
3158 98
3158 219
3158 633
3158 840
3158 915
3158 4136
3159 18
3159 868
3159 1429
3159 1841
3159 2222
3159 2410
3159 2766
3159 2954
3159 4607
3159 4926
3160 5
3160 31
3160 44
3160 66
3160 325
3160 348
3160 354
3160 1476
3160 2702
3160 4071
3160 4231
3160 4752
3160 4891
3161 220
3161 517
3161 839
3161 2144
3161 2589
3161 2717
3161 3842
3162 4
3162 27
3162 1102
3162 2217
3162 2463
3162 4495
3163 8
3163 16
3163 294
3163 397
3163 981
3163 1047
3163 1432
3163 1487
3163 1728
3163 2172
3163 4641
3164 14
3164 120
3164 519
3164 921
3164 3712
3164 4632
3165 260
3165 579
3165 1216
3165 1620
3165 1893
3165 3983
3166 78
3166 344
3166 496
3166 546
3166 547
3166 2294
3166 2470
3166 2675
3166 2857
3166 3352
3166 4072
3167 11
3167 345
3167 467
3167 1821
3167 1997
3168 9
3168 1216
3168 1863
3169 179
3169 193
3169 409
3169 989
3169 1333
3169 4108
3170 105
3170 120
3170 189
3170 255
3170 756
3170 1307
3171 15
3171 371
3171 706
3171 2147
3171 2192
3171 2538
3171 3407
3171 3735
3171 4422
3172 9
3172 16
3172 19
3172 296
3172 2489
3172 4709
3173 26
3173 56
3173 110
3173 482
3173 505
3173 1256
3173 3337
3174 5
3174 71
3174 169
3174 416
3174 765
3174 1447
3175 86
3175 1002
3175 1541
3175 2898
3175 3404
3175 4108
3176 18
3176 85
3176 87
3176 140
3176 164
3176 603
3176 979
3176 1418
3176 1897
3176 3736
3176 3847
3176 3912
3176 3965
3176 4954
3177 17
3177 324
3177 707
3177 1725
3177 2482
3177 2535
3177 2573
3177 2640
3177 3375
3178 1
3178 10
3178 14
3178 32
3178 174
3178 198
3178 2431
3178 3501
3178 4157
3179 177
3179 845
3179 1102
3179 1836
3179 2410
3179 3773
3180 9
3180 22
3180 23
3180 179
3180 631
3180 795
3180 2376
3181 88
3181 499
3181 714
3181 786
3181 2179
3181 3325
3181 3539
3181 3909
3181 4192
3181 4715
3182 0
3182 979
3182 1406
3182 1642
3182 2825
3182 3726
3182 3816
3182 3892
3183 272
3183 387
3183 705
3184 1
3184 4
3184 6
3184 8
3184 481
3184 663
3184 724
3184 1162
3184 4032
3185 59
3185 555
3185 2857
3185 3674
3185 4152
3186 18
3186 66
3186 188
3186 800
3186 905
3186 1178
3186 1470
3186 1835
3186 2469
3186 2864
3187 384
3187 852
3187 1607
3187 3048
3187 3679
3187 4316
3188 159
3188 258
3188 1112
3188 2851
3189 301
3189 504
3189 1752
3189 3881
3189 4555
3189 4618
3190 10
3190 49
3190 71
3190 130
3190 1749
3190 3393
3190 3791
3191 6
3191 940
3191 942
3191 1170
3191 1595
3191 2633
3191 2733
3191 3910
3191 4341
3192 10
3192 58
3192 252
3192 382
3192 2751
3192 2969
3192 4157
3193 301
3193 500
3193 517
3193 703
3193 1034
3193 1313
3193 2534
3193 4991
3194 210
3194 2292
3194 2591
3194 2725
3194 3869
3194 4561
3194 4906
3195 7
3195 38
3195 292
3195 519
3195 735
3195 4610
3196 40
3196 52
3196 256
3196 378
3196 2370
3196 2605
3196 2670
3196 4405
3196 4863
3197 9
3197 40
3197 102
3197 1821
3197 2450
3197 2667
3198 0
3198 12
3198 351
3198 528
3198 537
3198 624
3198 2168
3198 2904
3199 41
3199 59
3199 421
3199 710
3199 1985
3200 59
3200 95
3200 234
3200 682
3200 1011
3201 4
3201 8
3201 27
3201 40
3201 58
3201 60
3201 307
3201 597
3201 1659
3201 2582
3201 3942
3201 4488
3201 4732
3202 2
3202 87
3202 110
3202 169
3202 250
3202 890
3202 1138
3202 3917
3203 0
3203 19
3203 469
3203 612
3203 651
3203 723
3203 1110
3203 1715
3204 0
3204 549
3204 689
3204 2968
3204 3856
3204 4656
3205 36
3205 106
3206 45
3206 117
3206 650
3206 1993
3207 5
3207 17
3207 258
3207 770
3207 822
3207 1257
3207 1361
3207 1716
3207 2102
3207 2695
3207 3048
3207 3667
3207 4292
3208 7
3208 9
3208 10
3208 38
3208 2577
3208 2710
3208 2717
3208 4649
3208 4966
3209 83
3209 144
3209 261
3209 275
3209 348
3209 418
3209 1757
3209 2212
3209 2685
3209 3565
3210 8
3210 194
3210 483
3210 971
3210 1639
3210 2621
3210 3714
3210 4261
3210 4418
3211 184
3211 487
3211 557
3211 2084
3211 2968
3211 3084
3211 4195
3212 10
3212 68
3212 413
3212 527
3212 1227
3212 1741
3212 1803
3212 1961
3212 2382
3212 3856
3212 3994
3213 1
3213 2
3213 611
3213 1587
3214 2
3214 54
3214 2189
3214 2211
3215 192
3215 207
3215 360
3215 517
3215 701
3215 2330
3215 3078
3215 4323
3215 4625
3216 0
3216 1
3216 20
3216 32
3216 106
3216 906
3216 1804
3216 2492
3216 3846
3217 7
3217 312
3217 2185
3218 10
3218 18
3218 88
3218 244
3218 251
3218 853
3218 1779
3218 3429
3218 4977
3219 6
3219 14
3219 17
3219 100
3219 1357
3219 2678
3219 3699
3220 1
3220 17
3220 33
3220 432
3221 201
3221 285
3221 454
3221 511
3221 969
3221 1298
3221 3493
3221 3658
3222 18
3222 57
3222 201
3222 295
3222 337
3222 670
3222 846
3222 1900
3222 3261
3222 3316
3223 956
3223 1437
3223 1682
3223 1709
3223 2284
3223 2346
3223 3646
3224 0
3224 814
3224 3760
3225 23
3225 411
3225 1339
3225 2604
3225 2885
3225 3157
3225 4856
3226 22
3226 48
3226 976
3226 2783
3227 12
3227 13
3227 84
3227 101
3227 674
3227 4836
3228 10
3228 324
3228 509
3228 778
3228 819
3228 876
3228 2370
3228 4969
3229 6
3229 11
3229 576
3229 607
3229 1693
3229 3234
3229 3246
3229 3336
3230 955
3231 696
3231 1508
3231 1769
3231 2711
3231 3282
3231 3549
3232 7
3232 161
3232 319
3232 1389
3232 1736
3232 3613
3233 0
3233 49
3233 489
3233 726
3233 2610
3233 4394
3234 18
3234 189
3234 1115
3234 1405
3234 1841
3234 3229
3234 4592
3235 5
3235 16
3235 40
3236 38
3236 600
3236 615
3236 1600
3236 2769
3237 5
3237 603
3237 909
3237 2645
3237 4780
3238 2
3238 48
3238 67
3238 362
3238 867
3238 2409
3238 4399
3238 4906
3239 16
3239 17
3239 498
3239 595
3239 741
3239 1187
3239 1578
3239 2128
3239 2669
3239 2772
3239 3449
3239 3763
3240 48
3240 179
3240 384
3240 2204
3240 2830
3240 3530
3240 3579
3240 4176
3240 4732
3241 2
3241 13
3241 1031
3241 1867
3241 2179
3242 16
3242 35
3242 263
3242 304
3242 370
3242 375
3242 668
3242 3427
3243 178
3243 221
3243 342
3243 457
3243 1118
3243 2235
3243 4955
3244 267
3244 533
3244 551
3245 5
3245 68
3245 116
3245 1033
3245 1059
3245 1067
3245 1107
3246 35
3246 446
3246 1277
3246 1340
3246 1485
3246 2060
3246 3229
3246 3269
3246 3273
3246 4662
3247 13
3247 116
3247 1653
3247 2555
3247 2820
3247 3433
3248 10
3248 157
3248 394
3248 459
3248 1014
3248 1095
3248 2445
3249 0
3249 1
3249 322
3249 356
3249 1401
3249 1834
3249 3676
3249 4569
3250 17
3250 207
3250 354
3250 509
3250 955
3250 3721
3251 75
3251 1794
3251 3834
3252 0
3252 114
3252 261
3252 2000
3252 2419
3252 2833
3253 2
3253 7
3253 141
3253 244
3253 1691
3253 1885
3253 4188
3253 4240
3253 4448
3253 4958
3254 8
3254 25
3254 76
3254 1013
3254 1247
3254 4858
3255 0
3255 134
3255 281
3255 461
3255 658
3255 1402
3255 1406
3255 1711
3255 1870
3255 2570
3255 4206
3256 18
3256 314
3256 589
3256 1737
3257 336
3257 602
3257 1295
3257 1318
3258 17
3258 18
3258 21
3258 41
3258 72
3258 804
3258 2731
3258 2856
3258 3362
3258 4175
3258 4519
3258 4685
3258 4920
3259 62
3259 225
3259 496
3259 881
3259 1684
3259 3484
3259 3820
3259 3919
3260 8
3260 17
3260 45
3260 88
3260 143
3260 847
3260 2060
3260 2954
3261 10
3261 543
3261 1099
3261 3222
3262 128
3262 220
3262 269
3262 2214
3262 3313
3262 4235
3263 5
3263 12
3263 1978
3263 2658
3263 4232
3264 396
3264 726
3264 1572
3264 1620
3264 2481
3264 2955
3264 3521
3264 3551
3264 4316
3265 83
3265 822
3265 2922
3265 3871
3266 495
3266 858
3266 1026
3266 2682
3266 2903
3267 0
3267 524
3267 1013
3267 1540
3267 1951
3267 2501
3267 2574
3267 2584
3267 4914
3268 59
3268 66
3268 138
3268 557
3269 87
3269 104
3269 1027
3269 1406
3269 1717
3269 3246
3269 4545
3270 3
3270 87
3270 395
3270 671
3270 1392
3270 3546
3270 3818
3270 4789
3271 4
3271 5
3271 285
3271 383
3271 650
3271 2191
3271 2961
3271 4233
3271 4416
3271 4859
3272 23
3272 1343
3272 1434
3272 4353
3273 3
3273 85
3273 272
3273 395
3273 630
3273 805
3273 1040
3273 3020
3273 3246
3273 3792
3274 21
3274 97
3274 462
3274 604
3274 948
3274 1011
3274 1201
3274 1228
3274 2353
3275 56
3275 96
3275 323
3275 399
3275 711
3275 1067
3275 1959
3275 2215
3275 3591
3276 1
3276 6
3276 102
3276 562
3276 1351
3276 2000
3276 4469
3277 8
3277 25
3277 59
3277 2621
3277 4917
3278 2
3278 19
3278 22
3278 45
3278 229
3278 1704
3278 1894
3278 3053
3278 3431
3278 4650
3279 29
3279 2733
3279 4812
3280 400
3280 405
3280 825
3280 995
3280 1516
3280 2243
3280 3348
3280 3364
3281 17
3281 379
3282 3
3282 9
3282 87
3282 343
3282 1050
3282 1652
3282 3231
3282 4112
3282 4527
3282 4769
3283 2
3283 17
3283 171
3283 876
3283 1014
3283 1297
3283 1810
3283 2103
3283 2239
3283 4407
3283 4843
3284 41
3284 741
3284 837
3284 909
3284 1063
3284 2244
3284 2662
3285 13
3285 432
3285 2041
3285 2058
3285 3514
3285 4487
3285 4976
3286 10
3286 89
3286 127
3286 440
3286 560
3286 901
3286 1047
3286 2529
3286 2664
3286 3516
3286 4039
3286 4631
3286 4687
3287 3
3287 124
3287 188
3287 341
3287 1407
3287 2100
3287 2626
3287 2788
3288 6
3288 209
3288 287
3288 456
3288 1629
3288 4568
3288 4598
3289 1
3289 8
3289 15
3289 80
3289 769
3289 1288
3289 1326
3289 1366
3289 1561
3289 2445
3289 3121
3289 3478
3289 4505
3289 4948
3290 322
3290 3542
3290 4321
3291 4
3291 700
3291 715
3291 1042
3291 3003
3291 3443
3291 3499
3291 4031
3291 4932
3292 260
3292 307
3292 324
3292 459
3292 944
3292 2796
3292 4975
3293 7
3293 306
3293 345
3293 885
3293 894
3294 59
3294 461
3294 944
3294 1043
3294 1407
3294 1458
3294 1466
3295 7
3295 94
3295 230
3295 1315
3295 1486
3295 1690
3296 43
3296 56
3296 68
3296 432
3296 765
3296 1537
3296 1831
3296 4262
3297 193
3297 230
3297 332
3297 440
3297 756
3297 838
3297 966
3297 1258
3298 467
3298 1338
3298 1604
3298 1818
3298 2239
3299 179
3299 504
3299 549
3299 989
3299 1304
3300 527
3300 557
3300 569
3300 1365
3300 1522
3301 80
3301 153
3301 212
3301 602
3301 2957
3301 4066
3302 19
3302 61
3302 637
3302 2414
3302 2453
3303 6
3303 363
3303 1170
3303 1676
3303 1717
3303 3085
3303 3372
3303 3931
3304 3
3304 8
3304 511
3304 710
3304 1837
3304 1966
3304 3666
3305 438
3305 1340
3305 1984
3305 2326
3305 2626
3306 4
3306 127
3306 574
3306 666
3306 2129
3306 2484
3306 4993
3307 6
3307 69
3307 545
3307 1279
3307 1815
3307 3802
3308 10
3308 32
3308 256
3308 776
3308 2659
3309 4
3309 32
3309 533
3309 1399
3309 2417
3309 3388
3309 4100
3310 87
3310 488
3310 1476
3310 1664
3311 200
3311 273
3311 314
3311 537
3311 1663
3311 1672
3311 2181
3311 2968
3311 3979
3311 4030
3312 5
3312 505
3312 735
3312 1121
3312 1329
3312 2781
3313 57
3313 98
3313 206
3313 1095
3313 1317
3313 1386
3313 2556
3313 2689
3313 3262
3313 3832
3314 424
3314 1392
3315 2
3315 8
3315 19
3315 48
3315 300
3315 386
3315 415
3315 816
3315 2630
3315 3860
3315 3889
3316 646
3316 709
3316 1482
3316 1691
3316 3222
3316 3561
3316 3637
3317 64
3317 600
3317 981
3317 1994
3317 2300
3318 3
3318 11
3318 188
3318 571
3318 773
3318 841
3318 4902
3319 59
3319 532
3319 697
3319 1131
3319 1493
3319 4027
3320 14
3320 24
3320 178
3320 278
3320 1025
3320 1439
3320 2466
3320 2669
3320 3988
3320 4790
3320 4906
3321 17
3321 96
3321 2027
3321 3554
3322 1
3322 6
3322 9
3322 196
3322 345
3322 524
3322 1456
3323 18
3323 141
3323 459
3323 1468
3323 2704
3323 2971
3324 459
3324 531
3325 1
3325 14
3325 19
3325 86
3325 831
3325 1090
3325 1593
3325 1733
3325 3142
3325 3181
3325 3696
3325 4508
3326 192
3326 196
3326 247
3326 306
3326 308
3326 773
3326 1273
3326 1320
3326 2346
3326 2861
3326 3870
3326 4029
3326 4625
3326 4758
3327 10
3327 209
3327 306
3327 362
3327 731
3327 1226
3327 1584
3327 1837
3327 3107
3327 3402
3327 4895
3328 17
3328 293
3328 419
3328 1894
3328 2370
3328 3782
3328 4564
3329 40
3329 57
3329 1196
3329 1922
3329 3029
3330 37
3330 65
3330 145
3330 198
3330 566
3330 2816
3330 3380
3331 159
3331 750
3331 1252
3331 1855
3331 2480
3331 3037
3331 3386
3332 25
3332 710
3332 793
3332 2703
3333 12
3333 258
3333 389
3333 643
3333 759
3333 2250
3333 3646
3334 3
3334 1492
3334 1529
3334 2109
3334 2620
3335 1
3335 8
3335 29
3335 93
3335 101
3335 404
3335 2161
3335 3350
3336 96
3336 645
3336 664
3336 1044
3336 1523
3336 3229
3336 3353
3336 3443
3336 4816
3337 129
3337 212
3337 1133
3337 2458
3337 2676
3337 3173
3337 4102
3338 3
3338 268
3338 510
3338 2269
3338 2417
3339 388
3339 2589
3339 3097
3340 775
3340 2040
3340 2497
3340 2508
3340 2899
3341 7
3341 17
3341 18
3341 20
3341 35
3341 287
3341 3064
3341 3600
3342 0
3342 11
3342 70
3342 179
3342 260
3342 372
3342 586
3342 1408
3342 1715
3342 3435
3342 4283
3343 3
3343 21
3343 93
3343 126
3343 265
3343 838
3343 983
3343 1181
3343 2496
3343 4681
3344 2
3344 9
3344 31
3344 149
3344 766
3345 0
3345 47
3345 325
3345 435
3345 453
3345 2680
3345 3494
3346 16
3346 209
3346 282
3346 1377
3346 3005
3347 106
3347 985
3347 1743
3347 1936
3347 2288
3347 2305
3347 4924
3348 18
3348 37
3348 1327
3348 3028
3348 3078
3348 3280
3348 4083
3348 4779
3349 0
3349 170
3349 171
3349 4311
3350 519
3350 614
3350 1342
3350 1607
3350 1804
3350 2363
3350 3049
3350 3335
3351 9
3351 88
3351 661
3351 839
3351 1237
3351 1373
3351 2827
3351 3911
3352 554
3352 668
3352 1535
3352 1567
3352 3166
3353 13
3353 38
3353 1210
3353 1406
3353 2175
3353 2770
3353 3336
3353 3369
3353 4040
3353 4093
3354 207
3354 538
3354 3816
3355 2
3355 52
3355 139
3355 1274
3355 2725
3355 3041
3356 18
3356 611
3356 1052
3356 1207
3356 1544
3357 566
3357 1542
3357 1719
3357 1755
3357 1926
3357 2653
3357 4524
3358 33
3358 302
3358 309
3358 602
3358 1777
3358 2900
3358 3683
3359 0
3359 77
3359 161
3359 642
3359 3698
3359 4531
3360 0
3360 97
3360 560
3360 571
3360 676
3360 1335
3360 4513
3361 185
3361 322
3361 409
3361 467
3361 867
3361 1801
3361 1838
3361 1956
3361 2946
3361 3373
3361 3505
3361 3581
3361 3654
3361 4068
3361 4105
3362 159
3362 765
3362 1624
3362 1915
3362 2842
3362 3258
3362 3546
3362 3939
3362 4797
3363 745
3363 2302
3364 18
3364 667
3364 2456
3364 3280
3365 10
3365 13
3365 88
3365 1444
3365 2103
3365 3772
3365 4804
3365 4857
3366 16
3366 171
3366 248
3366 685
3366 1866
3366 2489
3366 3404
3366 4330
3366 4636
3366 4732
3366 4858
3367 14
3367 171
3367 811
3367 1276
3367 1328
3367 2615
3367 2812
3367 3127
3368 0
3368 122
3368 529
3368 1830
3368 1961
3368 2099
3368 3452
3368 3936
3368 4062
3368 4119
3368 4301
3369 8
3369 1221
3369 1390
3369 3136
3369 3353
3369 3879
3369 4879
3370 3
3370 989
3370 4114
3370 4587
3371 17
3371 1006
3371 1043
3371 2142
3371 2162
3371 2712
3371 3391
3371 4831
3372 25
3372 94
3372 515
3372 1663
3372 3303
3372 3434
3373 18
3373 143
3373 449
3373 1587
3373 1734
3373 3361
3374 90
3374 382
3374 791
3374 1340
3374 1482
3375 480
3375 664
3375 1305
3375 1615
3375 2502
3375 2855
3375 3177
3375 3870
3375 4286
3376 721
3376 2854
3377 428
3377 971
3377 1257
3377 2192
3377 4643
3378 3
3378 38
3378 501
3378 1248
3378 2030
3379 333
3379 616
3379 968
3379 1380
3379 4563
3380 0
3380 60
3380 91
3380 1090
3380 1135
3380 3330
3380 3395
3380 4163
3380 4427
3381 9
3381 504
3381 1162
3381 1858
3382 15
3382 1598
3382 1604
3382 1681
3382 4646
3383 8
3383 13
3383 31
3383 184
3383 188
3383 313
3383 1652
3383 4219
3384 6
3384 443
3384 1513
3384 1874
3384 1966
3384 4391
3385 1
3385 5
3385 122
3385 334
3385 398
3385 486
3385 786
3385 2955
3385 4127
3385 4137
3386 7
3386 14
3386 167
3386 2497
[truncated: 91,842 more chars]
