# Supplementary material
Source: ML conference proceedings conference paper supplement (https://proceedings.mlr.press/v130/kuhnle21a.html)
Supplement: Supplementary file 1 [file kuhnle21a-supp.zip › 553-supp/code/exp/general/explogfile]

Started at 10/13/20-14:29:16:
Google GQRLP 100 1000 100
Finished at 10/13/20-14:29:26:
Google GQRLP 100 1000 100
Started at 10/13/20-14:30:00:
Google GQRLP 100 1000 100
Finished at 10/13/20-14:47:11:
Google GQRLP 100 1000 100
