# Supplementary material
Source: ML conference proceedings conference paper supplement (https://proceedings.mlr.press/v130/kuhnle21a.html)
Supplement: Supplementary file 1 [file kuhnle21a-supp.zip › 553-supp/code/exp/single-pass/plot.py]

import matplotlib.pyplot as plt
import numpy as np
import sys
import statistics
import os.path

which=0; # 0 = solValue
if (len(sys.argv) == 1):
    print("usage: plot [vqm] dataname kmin kmax kinc (normalizeX: 1 or 0)");
    exit();


dataname=sys.argv[2]
kmin=sys.argv[3]
kmax=sys.argv[4];
kinc=sys.argv[5];

if (len(sys.argv) >= 7):
    normalizeX=bool(int(sys.argv[6]));
else:
    normalizeX=False;

if (len(sys.argv) == 8):
    printlegend=True;
else:
    printlegend=False;
    
scaleDiv=1;
normalize=False;

postfix='km' + kmin + 'kmx' + kmax + 'kinc' + kinc + '.pdf';
if (sys.argv[1][0] == 'v'):
    outFName='v-' + dataname + postfix;
    colObj = 10;
    colObjStd = 11;
    scaleDiv=1;
    normalize=True;
    which=0;
else:
    if (sys.argv[1][0] == 'q'):
        which = 1; #1 = queries
        outFName='q-' + dataname + postfix;
        colObj = 8;
        colObjStd = 9;
    else:
        if (sys.argv[1][0] == 'm'):
            which = 2; #1 = queries
            outFName='m-' + dataname + postfix;
            colObj = 4;
            colObjStd = 5;

colX = 2;
colN = 6;

postfix='km' + kmin + 'kmx' + kmax + 'kinc' + kinc + '.txt';

fnames = [ 'results' + dataname + '-G' + postfix,
           'results' + dataname + '-K' + postfix,
           'results' + dataname + '-S' + postfix,
           #'results' + dataname + '-Q-c1-d1.txt',
           'results' + dataname + '-Q-c1-d0.1-p' + postfix,
           #'results' + dataname + '-Q-c2-d0.2-p.txt',
           'results' + dataname + '-Q-c4-d0.4-p' + postfix,
           'results' + dataname + '-Q-c16-d1.6-p'+ postfix ];
           #'results' + dataname + '-Q-c256-d25.6-p.txt' ];

algnames = [ 'Greedy',
             'C&K',
             'SieveStream++',
             #'QuickStream$_1$',
             'QuickStream$_1$++',
             #'QuickStream$_{2}$++',
             'QuickStream$_{4}$++' ,
             'QuickStream$_{16}$++' ];
             #'QuickStream$_{256}$++' ];


colors = [ 'm',
           'y',
           'b',
           #'k',
           'c',
           #'0.5',
           #'0.5',
           #'0.75',
           '0.75',
           'g',
           'm' ];

markers = [ 'p',
            's',
            'v',
            #'<',
            '>',
            #'^',
            '*',
            #'1',
            'd',
            'X' ];

nalgs = 6;
X = [];
Obj = [];
ObjStd = [];
skip = [ False for i in range(0,nalgs) ];
nodes = 0;
for i in range( 0, nalgs ):
    fname = fnames[ i ];

    if (os.path.isfile( fname )):
        skip[i]=False;
        print ("Reading from file", fname);
        with open(fname) as f:
            lines = f.readlines();
            XN = [float(line.split()[ colN ]) for line in lines if line[0] != '#']
            if (len(XN) > 0):
                nodes = XN[0];
                XS = [float(line.split()[ colX ]) for line in lines if line[0] != '#']
                SObj = [float(line.split()[ colObj ])/scaleDiv for line in lines if line[0] != '#']
                SObjStd = [float(line.split()[ colObjStd ])/scaleDiv for line in lines if line[0] != '#']
            else:
                XS = [float(kmin)];
                SObj = [float('nan')];
                SObjStd = [float('nan')];
        
    else:
        if i == 0: #noGreedy
            normalize=False;
        skip[i]=True;
        XS = [float(kmin)];
        SObj = [float('nan')];
        SObjStd = [float('nan')];
    X.append( XS );
    Obj.append (SObj);
    ObjStd.append( SObjStd );


#if normalize:
if normalize:
    for i in range( 1, nalgs ):
        if i == 3:
            while len(Obj[i]) < len(Obj[ 0 ]):
                Obj[i].insert(0, float('nan'));
                ObjStd[i].insert(0, float(0));
                X[i].insert(0,0);

        for j in range( 0, len( Obj[ i ] ) ):
            Obj[i][j] = Obj[i][j] / Obj[0][j];
            ObjStd[i][j] = ObjStd[i][j] / Obj[0][j];

        print( algnames[i], min( Obj[i] ), max(Obj[i]),
               statistics.mean( Obj[i] ) );

   
plt.gcf().clear();
plt.rcParams['pdf.fonttype'] = 42;
plt.rcParams.update({'font.size': 24});
plt.rcParams.update({'font.weight': "bold"});
plt.rcParams["axes.labelweight"] = "bold";
#plt.xscale('log');


#plt.ticklabel_format(axis='both', style='sci' );
if (which == 1):
    plt.ylabel( 'Queries' );
    plt.yscale('log');
else:
    if (which == 2):
        plt.ylabel( 'Max Memory / $k$' );
        for i in range( 1, nalgs ):
            for j in range( 0, len( Obj[ i ] ) ):
                Obj[i][j] = Obj[i][j] / X[i][j];
                ObjStd[i][j] = ObjStd[i][j] / X[i][j];

    else:
        plt.ylabel( 'Value / Greedy' );
if normalizeX:
    plt.xlabel( "$k / n$" );
    for i in range( 1, nalgs ):
        for j in range( 0, len( X[ i ] ) ):
            X[i][j] = X[i][j] / nodes;
else:
    plt.xlabel( '$k$' );

if which==0 and normalize==False:
    #normalize by nodes
    for i in range(0,nalgs):
        for j in range( 0, len( Obj[ i ] ) ):
            Obj[i][j] = Obj[i][j] / nodes;
            ObjStd[i][j] = ObjStd[i][j] / nodes;
            plt.ylabel( "Value / $n$" );            

markSize=20;

if normalize:
    algmin = 1;
    algmax = nalgs;
    plt.ylim( 0.50, 1.05 );
else:
    algmin = 1;
    algmax = nalgs;

# if normalize:
#     threeMarks=[2,6,7,8,9,10,4];
# else:
#     threeMarks=[2,6,7,8,9,10];

print( nodes );

if (which == 1):
    plt.axhline( nodes, color='r' );
    ax = plt.gca();
    #ax.annotate('$n$', xy=(float(kmin), nodes), xytext=(float(kmin)-75, nodes - 100000), size=15 );
for i in range(algmin,algmax):
    #mi=i + 2;
    #mi=round(len(X[i]) / i) + 1;
    # if i in threeMarks:
    #     mi=round(len(X[i]) / 2) - 1;
    # else:
    #     mi=round(len(X[i]) / 3) - 1;
        
    #if (i == algmax - 1) and not normalize:
    mi = 4;
    plt.plot( X[i], Obj[i], ':', marker=markers[i],  label=algnames[i],ms = markSize,color = colors[i], markevery = mi);
    BObj = np.asarray( Obj[i] );
    BObjStd = np.asarray( ObjStd[i] );
    if i != 3:
        plt.fill_between( X[i], BObj - BObjStd, BObj + BObjStd,
                          alpha=0.5, edgecolor=colors[i], facecolor=colors[i]);


#plt.errorbar( X, Obj, yerr=BObjStd, fmt='-');


plt.gca().grid(which='major', axis='both', linestyle='--')


#plt.grid(color='grey', linestyle='--' );
if printlegend:
    plt.legend(loc='best', numpoints=1,prop={'size':18},framealpha=0.6);

plt.savefig( outFName, bbox_inches='tight' );
#plt.legend(loc='best', numpoints=1,prop={'size':18},framealpha=1.0);
#plt.savefig( 'WithLegend.png', bbox_inches='tight',dpi=500 );
