# Supplementary material
Source: ML conference proceedings conference paper supplement (https://proceedings.mlr.press/v130/kuhnle21a.html)
Supplement: Supplementary file 1 [file kuhnle21a-supp.zip › 553-supp/code/src/diff.tt]

26,27d25
< vector< size_t > emptySizetVector;
< 
139c137,138
< 
---
>    double tmpDouble = 0;
>    
214c213
< 	 
---
> 
222c221
< 	 bool weighted; 
---
> 	 bool weighted = false;
223a223,224
> 	    ss.clear();
> 	    ss.str( sline );
225,227d225
< 	       ss.clear();
< 	       ss.str( sline );
< 
229,231c227,235
< 		  ss >> this->n; //Value is currently ignored
< 		  ss >> weighted;
< 		  if (weighted) {
---
> 		  //process first line.
> 		  //determine if edge list is weighted or not
> 		  vector< unsigned > vtmp;
> 		  unsigned tmp;
> 		  while (ss >> tmp) {
> 		     vtmp.push_back(tmp);
> 		  }
> 		  if (vtmp.size() == 3) {
> 		     weighted = true;
233,234d236
< 		     
< 		     this->n = 0;
237,238d238
< 		     this->n = 0;
< 		     //init_empty_graph();
239a240,241
> 		  ss.clear();
> 		  ss.str( sline );
241,254d242
< 	       else {
< 		  //have an edge on this line
< 		  unsigned from,to; unsigned wht = 1;
< 		  ss >> from;
< 		  ss >> to;
< 		  if (weighted)
< 		     ss >> wht;
< 		  simplifyNode* emptyNode;
< 		  while (to >= this->n) {
< 		     emptyNode = new simplifyNode;
< 		     emptyNode->id = this->n;
< 		     adjList.push_back( emptyNode );
< 		     ++this->n;
< 		  }
256,263c244,257
< 		  while (from >= this->n) {
< 		     emptyNode = new simplifyNode;
< 		     emptyNode->id = this->n;
< 		     adjList.push_back( emptyNode );
< 		     ++this->n;
< 		  }
< 
< 		  add_edge( from, to, wht ); 
---
> 	       //have an edge on this line
> 	       unsigned from,to; unsigned wht = 1;
> 	       ss >> from;
> 	       ss >> to;
> 	       if (weighted)
> 		  ss >> wht;
> 
> 	       simplifyNode* emptyNode;
> 	       while (to >= this->n) {
> 		  emptyNode = new simplifyNode;
> 		  emptyNode->id = this->n;
> 		  adjList.push_back( emptyNode );
> 		  ++this->n;
> 	       }
264a259,263
> 	       while (from >= this->n) {
> 		  emptyNode = new simplifyNode;
> 		  emptyNode->id = this->n;
> 		  adjList.push_back( emptyNode );
> 		  ++this->n;
266a266,267
> 	       add_edge( from, to, wht ); 
> 
268a270
> 
270a273
>       
273,274c276,277
< 
<       void read_csv( string fname ) {
---
>       
>       void read_unweighted_edge_list( string fname ) {
281c284
< 	 bool weighted; 
---
> 
287,298c290,300
< 	       if (line_number == 0) {
< 		  ss >> this->n; //Value is currently ignored
< 		  ss >> weighted;
< 		  if (weighted) {
< 		     logg << "Graph is weighted." << endL;
< 		     
< 		     this->n = 0;
< 		  } else {
< 		     logg << "Graph is unweighted." << endL;
< 		     this->n = 0;
< 		     //init_empty_graph();
< 		  }
---
> 	       //have an edge on this line
> 	       unsigned from,to; unsigned wht = 1;
> 	       ss >> from;
> 	       ss >> to;
> 
> 	       simplifyNode* emptyNode;
> 	       while (to >= this->n) {
> 		  emptyNode = new simplifyNode;
> 		  emptyNode->id = this->n;
> 		  adjList.push_back( emptyNode );
> 		  ++this->n;
300,324d301
< 	       else {
< 		  //have an edge on this line
< 		  unsigned from,to; unsigned wht = 1;
< 		  char comma;
< 		  ss >> from;
< 		  ss >> comma;
< 		  ss >> to;
< 		  if (weighted)
< 		     ss >> wht;
< 		  simplifyNode* emptyNode;
< 		  while (to >= this->n) {
< 		     emptyNode = new simplifyNode;
< 		     emptyNode->id = this->n;
< 		     adjList.push_back( emptyNode );
< 		     ++this->n;
< 		  }
< 
< 		  while (from >= this->n) {
< 		     emptyNode = new simplifyNode;
< 		     emptyNode->id = this->n;
< 		     adjList.push_back( emptyNode );
< 		     ++this->n;
< 		  }
< 
< 		  add_edge( from, to, wht ); 
325a303,307
> 	       while (from >= this->n) {
> 		  emptyNode = new simplifyNode;
> 		  emptyNode->id = this->n;
> 		  adjList.push_back( emptyNode );
> 		  ++this->n;
328c310,311
< 	       ++line_number;
---
> 	       add_edge( from, to, wht ); 
> 
329a313,314
> 
> 	    ++line_number;
331a317
>       
334c320
< 
---
>       
544,561d529
<       size_t coverAdjacent( node_id v, vector< bool >& covered, vector< size_t >& nodesAdded = emptySizetVector ) {
< 	 size_t deg = 0;
< 	 if (!covered[ v ]) {
< 	    ++deg;
< 	    nodesAdded.push_back( v );
< 	    covered[v] = true;
< 	 }
< 	 for (size_t i =0; i < adjList[v].neis.size(); ++i) {
< 	    node_id w = adjList[v].neis[i].getId();
< 	    if (!(covered[w])){
< 	       covered[w] = true;
< 	       ++deg;
< 	       nodesAdded.push_back( w );
< 	    }
< 	 }
< 	 return deg;
<       }
<       
910,911d877
< 	 ifile << n << " 0 0" << endl;
<       
1179c1145,1151
< 	 (data[ name ]).push_back( val );
---
> 	 if (data.find( name ) != data.end()) {
> 	    (data[ name ]).push_back( val );
> 	 } else {
> 	    vector< double > tmp;
> 	    data[ name ] = tmp;
> 	    (data[ name ]).push_back( val );
> 	 }
1182,1186c1154,1183
<       void print( string name ) {
< 	 vector< double >& vals = data[ name ];
< 	 double sum = 0.0;
< 	 for (size_t i = 0; i < vals.size(); ++i) {
< 	    sum += vals[i];
---
>       bool print( string name, ostream& os, bool printStdDev = true, double& Oldmean = tmpDouble ) {
> 	 map< string, vector< double > >::iterator it = data.find( name );
> 	 if (it != data.end()) {
> 	    vector<double>& tmp = it->second;
> 	    double mean = 0.0;
> 	    for (size_t i = 0; i < tmp.size(); ++i) {
> 	       mean += tmp[i];
> 	    }
> 	    
> 	    
> 	    mean = mean / tmp.size();
> 
> 	    os << mean << ' ';
> 
> 	    if (printStdDev) {
> 	       double stdDev = 0.0;
> 	       for (size_t i = 0; i < tmp.size(); ++i) {
> 		  stdDev += (tmp[i]- mean)*(tmp[i]- mean);
> 	       }
> 	       if (tmp.size() > 1) {
> 		  stdDev = stdDev / ( tmp.size() - 1 );
> 		  stdDev = sqrt( stdDev );
> 		  os << stdDev << ' ';
> 	       } else {
> 		  os << 0.0 << ' ';
> 	       }
> 	    }
> 
> 	    Oldmean = mean;
> 	    return true;
1188,1189c1185,1186
< 	 
< 	 cout << sum / vals.size(); 
---
> 
> 	 return false;
1199d1195
<       	    os << setw(25);
1201c1197
< 	    os << to_string( index ) + it->first;
---
> 	    os << to_string( index ) + "_" + it->first << ' ';
1204,1206c1200
< 	       os << setw(25);
< 
< 	       os << to_string( index ) + it->first;
---
> 	       os << to_string( index ) + "_" + it->first << ' ';
1210,1211d1203
< 
< 
1223c1215
< 	    os << setw(25) << mean ;
---
> 	    os << mean << ' ';
1233c1225
< 		  os << setw(25) << stdDev ;
---
> 		  os << stdDev << ' ';
1235c1227
< 		  os << setw(25) << 0.0 ;
---
> 		  os << 0.0 << ' ';
