# Supplementary material
Source: ML conference proceedings conference paper supplement (https://proceedings.mlr.press/v130/kuhnle21a.html)
Supplement: Supplementary file 1 [file kuhnle21a-supp.zip › 553-supp/code/src/mygraph.cpp]

#ifndef MYGRAPH_CPP
#define MYGRAPH_CPP
#include <list>
#include <vector>
#include <string>
#include <iostream>
#include <fstream>
#include <sstream>
#include <algorithm>
#include <map>
#include <unordered_set>
#include <thread>
#include <iomanip>
#include <cmath>
#include <utility>
#include <queue>
#include <set>
#include <thread>
#include <mutex>
#include <random>
#include "logger.cpp"
#include "binheap.cpp"

using namespace std;

vector< size_t > emptySizetVector;

template< typename TContainer, typename TArgs, typename TWorker >
void parallelWork( TContainer& v, TArgs& args,
		   TWorker& worker, size_t nThreads ) {
   auto itBegin = v.begin();
   auto itEnd = itBegin;

   if (nThreads > v.size())
      nThreads = v.size();
  
   thread* wThreads = new thread[ nThreads ];
   mutex mtx;  
   for (size_t i = 0; i < nThreads; ++i) {
      if (i == nThreads - 1) {
	 itEnd = v.end();
      } else {
	 itEnd = itBegin;
	 for (size_t j = 0; j < (v.size())/nThreads; ++j)
	    ++itEnd;
      }


      wThreads[i] = thread( &TWorker::run,
			    itBegin,
			    itEnd,
			    ref( args ),
			    ref( mtx )
			    );

      itBegin = itEnd;
   }

   for (size_t i = 0; i < nThreads; ++i) {
      wThreads[i].join();
   }
    
   delete [] wThreads;
}


double elapsedTime( clock_t& t_start ) {
   return double(clock() - t_start) / CLOCKS_PER_SEC;
}

template<typename T>
void print_vector( vector< T >& v, ostream& os = cout ) {
   for (size_t i = 0; i < v.size(); ++i) {
      os << v[i] << ' ';
   }
   os << endl;
}

template <typename T, typename Compare>
std::vector<std::size_t> sort_permutation(
					  const std::vector<T>& vec,
					  Compare& compare)
{
   std::vector<std::size_t> p(vec.size());
   std::iota(p.begin(), p.end(), 0);
   std::sort(p.begin(), p.end(),
	     [&](std::size_t i, std::size_t j){ return compare(vec[i], vec[j]); });
   return p;
}

template <typename T>
void apply_permutation_in_place(
				std::vector<T>& vec,
				const std::vector<std::size_t>& p)
{
   std::vector<bool> done(vec.size());
   for (std::size_t i = 0; i < vec.size(); ++i)
      {
	 if (done[i])
	    {
	       continue;
	    }
	 done[i] = true;
	 std::size_t prev_j = i;
	 std::size_t j = p[i];
	 while (i != j)
	    {
	       std::swap(vec[prev_j], vec[j]);
	       done[j] = true;
	       prev_j = j;
	       j = p[j];
	    }
      }
}


template <typename T>
bool vector_ctns( std::vector<T>& vec, T item ) {
   for (std::size_t i = 0; i < vec.size(); ++i) {
      if (vec[i] == item) {
	 return true;
      }
   }

   return false;
}


namespace mygraph {

   random_device rd;
   mt19937 gen( rd() );
  
   typedef uint32_t node_id;
   bool mycompare( const node_id& a, const node_id& b ) {
      return a < b;
   }  


   //Graph structure solely for removing isolated nodes
   //Removes all isolated nodes, renumbers vertices from 0, n-1
   //unweighted, undirected graphs only
   class simplifyNode {
   public:
      node_id id;
      vector< simplifyNode* > neis;
      vector< unsigned > nei_weights;
      //      vector< simplifyNode* > _neis;
   };

   
   class simplifyGraph {
   public:
      node_id n;
      Logger logg;
      vector< simplifyNode* > adjList;
      
      //undirected
      void add_edge( node_id from, node_id to, unsigned wht = 1 ) {

	 if (!vector_ctns( adjList[from]->neis, adjList[to] ) ) {
	    adjList[from]->neis.push_back( adjList[to] );
	    adjList[from]->nei_weights.push_back( wht );
	 }
	 if (!vector_ctns( adjList[to]->neis, adjList[from] ) ) {
	    adjList[to]->neis.push_back( adjList[from] );
	    adjList[to]->nei_weights.push_back( wht );
	 }
      }

      void remove_isolates() {
	 vector< simplifyNode* > newAdjList;
	 for (node_id i = 0; i < n; ++i) {
	    if (!adjList[i]->neis.empty())
	       newAdjList.push_back( adjList[i] );
	 }

	 adjList.swap( newAdjList );
	 n = static_cast<node_id>( adjList.size() );
      }

      void renumber_vertices() {
	 for (node_id i = 0; i < n; ++i) {
	    adjList[i]->id = i;
	 }
      }

      /*
       * Writes full adjacency list to
       * binary format of tinyGraph
       */
      void write_bin( string fname ) {
	 ofstream ifile ( fname.c_str(), ios::out | ios::binary );

	 ifile.write( (char*) &n, sizeof( node_id ) );
	 double preprocessTime = 0.0;
	 ifile.write( (char*) &preprocessTime, sizeof(double) );

	 size_t ss;
	 node_id nei_id;
	 unsigned char w;
	 for ( unsigned i = 0; i < n; ++i ) {
	    ss = adjList[i]->neis.size();
	    ifile.write( (char*) &ss, sizeof( size_t ) );

	    for (unsigned j = 0; j < ss; ++j) {
	       nei_id = adjList[i]->neis[j]->id;
	       w = static_cast<unsigned char>( adjList[i]->nei_weights[ j ] );
	       ifile.write( (char*) &nei_id, sizeof( node_id ) );
	       ifile.write( (char*) &w, sizeof( unsigned char ) );
	    }
	 }
      }
	 
            void read_edge_list( string fname ) {
	 logg << "Reading edge list from file " << fname << endL;
	 ifstream ifile ( fname.c_str() );

	 string sline;
	 stringstream ss;
	 unsigned line_number = 0;
	 bool weighted = false;
	 while (getline( ifile, sline ) ) {
	    ss.clear();
	    ss.str( sline );
	    if (sline[0] != '#') {
	       if (line_number == 0) {
		  //process first line.
		  //determine if edge list is weighted or not
		  vector< unsigned > vtmp;
		  unsigned tmp;
		  while (ss >> tmp) {
		     vtmp.push_back(tmp);
		  }
		  if (vtmp.size() == 3) {
		     weighted = true;
		     logg << "Graph is weighted." << endL;
		  } else {
		     logg << "Graph is unweighted." << endL;
		  }
		  ss.clear();
		  ss.str( sline );
	       }

	       //have an edge on this line
	       unsigned from,to; unsigned wht = 1;
	       ss >> from;
	       ss >> to;
	       if (weighted)
		  ss >> wht;

	       simplifyNode* emptyNode;
	       while (to >= this->n) {
		  emptyNode = new simplifyNode;
		  emptyNode->id = this->n;
		  adjList.push_back( emptyNode );
		  ++this->n;
	       }

	       while (from >= this->n) {
		  emptyNode = new simplifyNode;
		  emptyNode->id = this->n;
		  adjList.push_back( emptyNode );
		  ++this->n;
	       }

	       add_edge( from, to, wht ); 

	       ++line_number;
	    }

	 }
      
      
	 ifile.close();
      }

      void read_csv( string fname ) {
	 logg << "Reading edge list from file " << fname << endL;
	 ifstream ifile ( fname.c_str() );

	 string sline;
	 stringstream ss;
	 unsigned line_number = 0;
	 bool weighted; 
	 while (getline( ifile, sline ) ) {
	    if (sline[0] != '#') {
	       ss.clear();
	       ss.str( sline );

	       if (line_number == 0) {
		  ss >> this->n; //Value is currently ignored
		  ss >> weighted;
		  if (weighted) {
		     logg << "Graph is weighted." << endL;
		     
		     this->n = 0;
		  } else {
		     logg << "Graph is unweighted." << endL;
		     this->n = 0;
		     //init_empty_graph();
		  }
	       }
	       else {
		  //have an edge on this line
		  unsigned from,to; unsigned wht = 1;
		  char comma;
		  ss >> from;
		  ss >> comma;
		  ss >> to;
		  if (weighted)
		     ss >> wht;
		  simplifyNode* emptyNode;
		  while (to >= this->n) {
		     emptyNode = new simplifyNode;
		     emptyNode->id = this->n;
		     adjList.push_back( emptyNode );
		     ++this->n;
		  }

		  while (from >= this->n) {
		     emptyNode = new simplifyNode;
		     emptyNode->id = this->n;
		     adjList.push_back( emptyNode );
		     ++this->n;
		  }

		  add_edge( from, to, wht ); 

	       }

	       ++line_number;
	    }
	 }
      
	 ifile.close();
      }

   };

   //Compact, undirected graph structure

   
   uint32_t bitMask = ~(3 << 30);
   uint32_t bitS = (1 << 31);
   uint32_t bitW = (1 << 30);

   /*
    * Edge classes
    */
   class tinyEdge {
   public:
      //last 30 bits are target node_id
      //first bit is inS, second bit is inW
      uint32_t target;
      unsigned char weight;
     
      node_id getId() const {
	 return target & bitMask;
      }

      bool inS() {
	 return (target >> 31);
      }

      bool inW() {
	 return (target >> 30) & 1; //
      }

      void setS() {
	 target = target | bitS;
      }
    
      void setW() {
	 target = target | bitW;
      }

      void unsetS() {
	 target = target & (~bitS);
      }

      void unsetW() {
	 target = target & (~bitW);
      }

      tinyEdge() {
	 target = 0;
      }

      tinyEdge( node_id nid, unsigned char w = 1) {
	 target = nid; //inS = inW = false;
	 weight = w;
      }

      tinyEdge( const tinyEdge& rhs ) {
	 target = rhs.target;
	 weight = rhs.weight;
      }
   };

   /*
    * Only works if inS and inW are 0
    * Faster than operator<
    */
   bool tinyEdgeCompare( const tinyEdge& a, const tinyEdge& b ) {
      return a.target < b.target;
   }

   /*
    * Works regardless of status of front bits
    */
   bool operator<( const tinyEdge& a, const tinyEdge& b ) {
      return a.getId() < b.getId();
   }

   /*
    * Full edge class 'fEdge'
    */
   class fEdge {
   public:
      node_id x;
      node_id y;

      mutable double w;
      mutable bool inS = false;
    
      fEdge() { }
      fEdge( node_id xx, node_id yy ) : x(xx), y(yy), w(1.0) { }
      fEdge( node_id xx, node_id yy, double ww ) : x(xx), y(yy), w(ww) { }
      fEdge( const fEdge& rhs ) {
	 x = rhs.x;
	 y = rhs.y;
	 w = rhs.w;
      }
   };

   struct fEdgeLT {
      bool operator() ( const fEdge& f1, const fEdge& f2 ) {
	 node_id firstL;
	 node_id firstR;
	 node_id secL;
	 node_id secR;

	 if (f1.x > f1.y) {
	    firstL = f1.y;
	    firstR = f1.x;
	 } else {
	    firstL = f1.x;
	    firstR = f1.y;
	 }

	 if (f2.x > f2.y) {
	    secL = f2.y;
	    secR = f2.x;
	 } else {
	    secL = f2.x;
	    secR = f2.y;
	 }
	      
      
	 if (firstL != secL)
	    return (firstL < secL);
	 else 
	    return (firstR < secR);
      }
   };

   //Ignores edge weight, undirected
   bool operator== ( const fEdge& f1, const fEdge& f2 ) {
      return ((f1.x == f2.x) && (f1.y == f2.y)) || ((f1.x == f2.y) && (f2.x == f1.y));
   }

   //For printing, ignores weights
   ostream& operator<< ( ostream& os, const fEdge& f2 ) {
      os << '(' << f2.x << ',' << f2.y << ')' << ' ';
      return os;
   }
  
   //Node class
   class tinyNode {
   public:
      bool inA = false;
      bool inB = false;
      bool inD = false;
      bool inE = false;
      bool inC = false;
      vector< tinyEdge > neis;

      tinyNode () { }
     
      tinyNode ( const tinyNode& rhs ) {
	 neis.assign( rhs.neis.begin(), rhs.neis.end() );
	 inA = rhs.inA;
	 inB = rhs.inB;
	 inC = rhs.inC;
	 inD = rhs.inD;
	 inE = rhs.inE;
      }

      vector< tinyEdge >::iterator incident( node_id& out ) {
	 vector< tinyEdge >::iterator it = neis.begin();
	 do {
	    if (it->getId() == out)
	       return it;
	    ++it;
	 } while (it != neis.end());

	 return it;
      }
   };
   
   class tinyGraph {
   public:
      vector< tinyNode > adjList;
      unsigned n;
      unsigned m;
      Logger logg;

      double preprocessTime;
      tinyGraph() {
	 n = 0;
	 m = 0;
      }

      tinyGraph( const tinyGraph& h ) {
	 adjList.assign( h.adjList.begin(), h.adjList.end() );
	 n = h.n;
	 m = h.m;
	 preprocessTime = h.preprocessTime;
      }

      void assign( const tinyGraph& h ) {
	 adjList.assign( h.adjList.begin(), h.adjList.end() );
	 n = h.n;
	 m = h.m;
	 preprocessTime = h.preprocessTime;
      }

      void init_empty_graph() {
	 tinyNode emptyNode;
	 adjList.assign(n, emptyNode);
      }

      size_t getDegree( node_id v ) {
	 return adjList[v].neis.size();
      }

      size_t coverAdjacent( node_id v, vector< bool >& covered, vector< size_t >& nodesAdded = emptySizetVector ) {
	 size_t deg = 0;
	 if (!covered[ v ]) {
	    ++deg;
	    nodesAdded.push_back( v );
	    covered[v] = true;
	 }
	 for (size_t i =0; i < adjList[v].neis.size(); ++i) {
	    node_id w = adjList[v].neis[i].getId();
	    if (!(covered[w])){
	       covered[w] = true;
	       ++deg;
	       nodesAdded.push_back( w );
	    }
	 }
	 return deg;
      }
      
      size_t getWeightedDegree( node_id v ) {
	 size_t wd = 0;
	 for (size_t i =0; i < adjList[v].neis.size(); ++i) {
	    wd += adjList[v].neis[i].weight;
	 }
	 return wd;
      }

      size_t getDegreeMinusA( node_id v ) {
	 size_t deg = 0;
	 for (size_t i =0; i < adjList[v].neis.size(); ++i) {
	    node_id w = adjList[v].neis[i].target;
	    if (!(adjList[w].inA)){
	       ++deg;
	    }
	 }
	 return deg;
      }

      size_t getDegreeMinusB( node_id v ) {
	 size_t deg = 0;
	 for (size_t i =0; i < adjList[v].neis.size(); ++i) {
	    node_id w = adjList[v].neis[i].target;
	    if (!(adjList[w].inB)){
	       ++deg;
	    }
	 }
	 return deg;
      }

      size_t getDegreeMinusSet( node_id v, vector<bool>& set ) {
	 size_t deg = 0;
	 for (size_t i =0; i < adjList[v].neis.size(); ++i) {
	    node_id w = adjList[v].neis[i].getId();
	    if (!(set[w])){
	       ++deg;
	    }
	 }
	 return deg;
      }

      size_t getWeightedDegreeMinusSet( node_id v, vector<bool>& set ) {
	 size_t deg = 0;
	 for (size_t i =0; i < adjList[v].neis.size(); ++i) {
	    node_id w = adjList[v].neis[i].getId();
	    if (!(set[w])){
	       deg += adjList[v].neis[i].weight;
	    }
	 }
	 return deg;
      }

      void clearAB() {
	 for (node_id i = 0; i < n; ++i) {
	    adjList[i].inA = false;
	    adjList[i].inB = false;
	 }
      }

      
     /*
      * Replaces graph with undirected, unweighted ER graph with n nodes
      * edge prob p
      */
     void erdos_renyi_undirected( node_id n, double p ) {
	adjList.clear();
	this->n = n;
	this->m = 0;
	init_empty_graph();
	uniform_real_distribution< double > dist(0.0,1.0);
	
	for (node_id i = 0; i < n; ++i) {
	   for (node_id j = i + 1; j < n; ++j) {
	      double rand = dist( gen );
	      if (rand < p) {
		 ++this->m;
	
		 add_edge_immediate( i, j );
	      }
	   }
	}

     }

      /*
      * Replaces graph with undirected, BA graph
      */
      void barabasi_albert( node_id n, size_t m0, size_t m ) {
	adjList.clear();
	this->n = n;
	this->m = 0;
	init_empty_graph();

	for (node_id u = 0; u < m0; ++u) {
	   for (node_id v = u + 1; v < m0; ++v) {
	      ++this->m;
	      add_edge_immediate(u,v);
	   }
	}
	
	uniform_real_distribution< double > dist(0.0,1.0);
	node_id u = m0;
	while (u < n) {
	   for (size_t i = 0; i < m; ++i) {
	      for (size_t j = 0; j < u; ++j) {
		 double rand = dist( gen );
		 size_t dj = getDegree( j );
		 if (rand < static_cast<double>(dj) / (2 *this->m) ) {
		    ++this->m;
		    fEdge ee( u, j );
		    add_edge( ee );
		    break;
		 }
	      }
	   }
	   ++u;
	}
      }

      /*
       * Adds undirected edge immediately into graph
       */
      void add_edge_immediate( unsigned from, unsigned to, unsigned char wht = 1 ) {
	 tinyEdge FT( to, wht );
	 tinyEdge TF( from, wht );
	 adjList[ from ].neis.push_back( FT );
	 adjList[ to ].neis.push_back( TF );
      }
    

      /*
       * Adds half of undirected edge, keeping adj. list sorted by target id
       * Checks to make sure graph remains simple, does not add edge
       * otherwise
       */
      bool add_edge_half( node_id from, node_id to, vector< tinyEdge >::iterator& edgeAdded,
			  unsigned char wht = 1) {
	 //logg << "Attempting to add " << from << " " << to << endL;
	 if (from == to)
	    return false;
      
	 vector< tinyEdge >& v1 = adjList[ from ].neis;

	 auto it = v1.begin();
	 while (it != v1.end()) {
	    if (it->getId() >= to)
	       break;

	    ++it;
	 }

	 tinyEdge newEdge( to, wht );
      
	 if (it != v1.end()) {
	    if (it->getId() == to) {
	       //This edge already exists, so do not add it
	       return false;
	    }
	    //The element should be inserted
	    edgeAdded = v1.insert( it, newEdge ); //O( max_deg )
	    ++m;
	    return true;
	 } 

	 edgeAdded = v1.insert( it, newEdge );
	 ++m;
	 return true;
      }

      bool add_edge( fEdge& e ) {
	 vector< tinyEdge >::iterator tmp;
	 if (add_edge_half( e.x, e.y, tmp, static_cast< unsigned char >(e.w) )) {
	    add_edge_half( e.y, e.x, tmp, static_cast< unsigned char >(e.w) );

	    return true;
	 }

	 return false;
      }
    
      bool add_edge( node_id& from, node_id& to, unsigned char w = 1 ) {
	 vector< tinyEdge >::iterator tmp;
	 if (add_edge_half( from, to, tmp, w )) {
	    add_edge_half( to, from, tmp, w );

	    return true;
	 }

	 return false;
      }

      unsigned char getEdgeWeight( node_id from, node_id to ) {
	 unsigned char w;
	 vector< tinyEdge >& v1 = adjList[ from ].neis;

	 auto it = v1.begin();
	 while (it != v1.end()) {
	    if (it->getId() >= to)
	       break;

	    ++it;
	 }

	 if (it != v1.end()) {
	    if (it->getId() == to) {
	       w = it->weight;
	       return w;
	    }
	 }

	 return 0;
      }
    
      unsigned char remove_edge_half( node_id from, node_id to ) {
	 //logg << "Attempting to remove " << from << " " << to << endL;
	 if (from == to)
	    return 0;
	 unsigned char w;

	 vector< tinyEdge >& v1 = adjList[ from ].neis;

	 auto it = v1.begin();
	 while (it != v1.end()) {
	    if (it->getId() >= to)
	       break;

	    ++it;
	 }

	 if (it != v1.end()) {
	    if (it->getId() == to) {
	       w = it->weight;
	       v1.erase( it );
	       --m;
	       return w;
	    }
	 } 

	 return 0;
      }

      // /*
      //  * Removes self-loops and multi-edges
      //  * Assumes sorted adjacency list in each tinyNode
      //  */
      // void simplify() {
      //   for (unsigned i = 0; i < n; ++i) {
      // 	bool b_continue;
      // 	do {
      // 	  b_continue = false;
      // 	  auto it1 = adjList[i].neis.begin();
      // 	  auto it2 = it1 + 1;
      // 	  while (it2 != adjList[i].neis.end()) {
      // 	    if (it1->getId() == it2->getId()) {
      // 	      //remove multi-edge
      // 	      b_continue = true;
      // 	      adjList[i].neis.erase( it1 );
      // 	      break;
      // 	    }
      // 	    if (it1->getId() == i ) {
      // 	      //remove loop
      // 	      adjList[i].neis.erase( it1 );
      // 	      b_continue = true;
      // 	      break;
      // 	    }
      // 	    if (it2->getId() == i ) {
      // 	      //remove loop
      // 	      adjList[i].neis.erase( it2 );
      // 	      b_continue = true;
      // 	      break;
      // 	    }
		 
      // 	    ++it2; ++it1;
      // 	  }
      // 	} while (b_continue);
      //   }
      // }

      void read_bin( string fname ) {
	 this->adjList.clear();
	 this->m = 0;
	 this->n = 0;
      
	 ifstream ifile ( fname.c_str(), ios::in | ios::binary );
	 unsigned n;
	 ifile.read( (char*) &n, sizeof( node_id ) );
	 ifile.read( (char*) &preprocessTime, sizeof(double) );
      
	 this->n = n;

	 init_empty_graph();
	 size_t ss;
	 tinyEdge temp;
	 node_id nei_id;
	 unsigned char w;

	 for ( unsigned i = 0; i < n; ++i ) {

	    ifile.read( (char*) &ss, sizeof( size_t ) );

	    adjList[i].neis.assign( ss, temp );
	    this->m += ss;
	    for (unsigned j = 0; j < ss; ++j) {
	       ifile.read( (char*) &nei_id, sizeof( node_id ) );
	       ifile.read( (char*) &w, sizeof( unsigned char ) );
	       adjList[i].neis[j].target = nei_id;
	       adjList[i].neis[j].weight = w;
	    }
	 }

	 //      logg(INFO, "Sorting neighbor lists..." );
	 if (preprocessTime == 0.0) {
	    clock_t t_start = clock();
	    for (unsigned i = 0; i < n; ++i) {
	       sort( adjList[i].neis.begin(), adjList[i].neis.end(), tinyEdgeCompare );
	    }
	    preprocessTime = double (clock() - t_start) / CLOCKS_PER_SEC;
	 }
      }

    
      void write_bin( string fname ) {
	 ofstream ifile ( fname.c_str(), ios::out | ios::binary );
	 ifile.write( (char*) &n, sizeof( node_id ) );
	 ifile.write( (char*) &preprocessTime, sizeof(double) );
      
	 size_t ss;
	 tinyEdge temp;
	 node_id nei_id;
	 unsigned char w;
	 for ( unsigned i = 0; i < n; ++i ) {
	
	    ss = adjList[i].neis.size();
	    ifile.write( (char*) &ss, sizeof( size_t ) );

	    for (unsigned j = 0; j < ss; ++j) {
	       nei_id = adjList[i].neis[j].target;
	       w = adjList[i].neis[j].weight;
	       ifile.write( (char*) &nei_id, sizeof( node_id ) );
	       ifile.write( (char*) &w, sizeof( unsigned char ) );
	    }
	 }

	 ifile.close();
      }

      void write_edge_list( string fname ) {
	 ofstream ifile ( fname.c_str(), ios::out );
	 ifile << n << " 0 0" << endl;
      
	 size_t ss;
	 tinyEdge temp;
	 node_id nei_id;

	 for ( unsigned i = 0; i < n; ++i ) {
	    
	    ss = adjList[i].neis.size();
	    
	    for (unsigned j = 0; j < ss; ++j) {
	       nei_id = adjList[i].neis[j].target;
	       ifile << i << ' ' << nei_id << '\n';
	       
	    }
	 }

	 ifile.flush();
	 ifile.close();
      }

      /*
       * Reads undirected graph from edge list
       * Returns pre-processing time for graph
       */
      double read_edge_list( string fname, bool checkSimple = true ) {
	 cout << "Reading edge list from file " << fname << endl;
	 ifstream ifile ( fname.c_str() );
	 bool weighted;
	 uint32_t n;

	 string sline;
	 stringstream ss;
	 unsigned line_number = 0;
	 while (getline( ifile, sline ) ) {
	    if (sline[0] != '#') {
	       ss.clear();
	       ss.str( sline );

	       if (line_number == 0) {
		  ss >> n;
		  ss >> weighted;
		  this->n = n;

		  if (weighted)
		     cout << "Graph is weighted." << endl;
		  else
		     cout << "Graph is unweighted." << endl;
	    
		  init_empty_graph();
	       }
	       else {
		  //have an edge on this line
		  unsigned from,to;
		  double weight = 1.0;
		  ss >> from;
		  ss >> to;

		  if (weighted) {

		     ss >> weight;

		  }

    
		  if (!checkSimple)
		     add_edge_immediate( from, to, static_cast<unsigned char>(weight) );
		  else {
		     while (to >= this->n) {
			++this->n;
			tinyNode emptyNode;
			adjList.push_back( emptyNode );
		     }

		     while (from >= this->n) {
			++this->n;
			tinyNode emptyNode;
			adjList.push_back( emptyNode );
		     }

		     add_edge( from, to, static_cast<unsigned char>(weight) );

		  }
	  
	       }

	       ++line_number;
	    }
	 }
	 ifile.close();
	 
	 //      logg(INFO, "Sorting neighbor lists..." );
	 clock_t t_start = clock();
	 for (unsigned i = 0; i < n; ++i) {
	    //	    adjList[i].sort( tinyEdgeCompare );
	    sort( adjList[i].neis.begin(), adjList[i].neis.end(), tinyEdgeCompare );
	    //update location of mate pairs
	    //	for (unsigned j = 0; j < adjList[i].neis.size(); ++j) {
	    //	  uint32_t& target = adjList[i].neis[ j ].target;
	    //	  uint32_t& mp = adjList[i].neis[ j ].matePairLoc;
	    //	  (adjList[ target  ].neis[ mp ]).matePairLoc = j;
	    //}
	 }
	 preprocessTime = double (clock() - t_start) / CLOCKS_PER_SEC;
	 return double (clock() - t_start) / CLOCKS_PER_SEC;
      }

      /*
       * Reads undirected graph from edge list
       * Returns pre-processing time for graph
       */
      double read_directed_edge_list( string fname, bool checkSimple = true ) {
	 logg << "Reading edge list from file " << fname << endL;
	 ifstream ifile ( fname.c_str() );
	 bool weighted;
	 uint32_t n;

	 string sline;
	 stringstream ss;
	 unsigned line_number = 0;
	 m = 0;
	 while (getline( ifile, sline ) ) {
	    if (sline[0] != '#') {
	       ss.clear();
	       ss.str( sline );

	       if (line_number == 0) {
		  ss >> n;
		  ss >> weighted;
		  this->n = n;

		  if (weighted)
		     logg << "Graph is weighted." << endL;
		  else
		     logg << "Graph is unweighted." << endL;
	    
		  init_empty_graph();
	       }
	       else {
		  //have an edge on this line
		  unsigned from,to;
		  double weight = 1.0;
		  ss >> from;
		  ss >> to;

		  if (weighted) {

		     ss >> weight;

		  }

    
		  if (!checkSimple)
		     add_edge_immediate( from, to, static_cast<unsigned char>(weight) );
		  else {
		     while (to >= this->n) {
			++this->n;
			tinyNode emptyNode;
			adjList.push_back( emptyNode );
		     }

		     while (from >= this->n) {
			++this->n;
			tinyNode emptyNode;
			adjList.push_back( emptyNode );
		     }
		     vector<tinyEdge>::iterator throwAway;
		     if (add_edge_half( from, to, throwAway, static_cast<unsigned char>(weight) ))
			++m;

		  }
	  
	       }

	       ++line_number;
	    }
	 }
	 ifile.close();
	 
	 //      logg(INFO, "Sorting neighbor lists..." );
	 clock_t t_start = clock();
	 for (unsigned i = 0; i < this->n; ++i) {
	    //	    adjList[i].sort( tinyEdgeCompare );
	    sort( adjList[i].neis.begin(), adjList[i].neis.end(), tinyEdgeCompare );
	    //update location of mate pairs
	    //	for (unsigned j = 0; j < adjList[i].neis.size(); ++j) {
	    //	  uint32_t& target = adjList[i].neis[ j ].target;
	    //	  uint32_t& mp = adjList[i].neis[ j ].matePairLoc;
	    //	  (adjList[ target  ].neis[ mp ]).matePairLoc = j;
	    //}
	 }
	 preprocessTime = double (clock() - t_start) / CLOCKS_PER_SEC;
	 logg << "Preprocessing took " << preprocessTime << "s" << endL;
	 logg << "Graph has n=" << this->n << ", m=" << m << endL;
	 return double (clock() - t_start) / CLOCKS_PER_SEC;
      }

      vector< tinyEdge >::iterator findEdgeInList( node_id source, node_id target ) {
	 vector< tinyEdge >& v1 = adjList[source].neis;
	 for (auto it = v1.begin();
	      it != v1.end();
	      ++it ) {
	    if (it->getId() == target)
	       return it;
	 }

	 return v1.end(); //Edge not found
      }

      void print( ostream& os ) {
	 for (size_t i = 0; i <adjList.size(); ++i) {
	    os << i << endl;
	    for (size_t j = 0; j < adjList[i].neis.size(); ++j) {
	       os << adjList[i].neis[j].getId() << ' ';
	    }
	    os << endl;
	 }
      }

      /*
       * Removed weight of edge removed
       * 0 if no edge removed
       */
      unsigned char remove_edge( node_id s, node_id t ) {
	 if ( remove_edge_half( s , t ) > 0) {
	    return remove_edge_half(t,s);
	 }

	 return 0;
      }

      /*
       * Removed weight of edge removed
       * 0 if no edge removed
       */
      unsigned char remove_edge( fEdge& e ) {
	 if ( remove_edge_half( e.x , e.y ) > 0) {
	    return remove_edge_half( e.y , e.x);
	 }

	 return 0;
      }

      unsigned countS() {
	 unsigned count = 0;
	 for (unsigned s = 0; s < adjList.size(); ++s) {
	    for (auto it2 = adjList[s].neis.begin();
		 it2 != (adjList[s]).neis.end();
		 ++it2 ) {
	       if ((*it2).inS()) {
		  ++count;
	       }
	    }
	 }
	 return count;
      }

   };
    
   class resultsHandler {
   public:
      map< string, vector<double> > data;
      
      void init( string name ) {
	 vector< double > tmp;
	 data[ name ] = tmp;
      }

      void add( string name, double val ) {
	 (data[ name ]).push_back( val );
      }

      void print( string name ) {
	 vector< double >& vals = data[ name ];
	 double sum = 0.0;
	 for (size_t i = 0; i < vals.size(); ++i) {
	    sum += vals[i];
	 }
	 
	 cout << sum / vals.size(); 
      }
      
      void print( ostream& os, bool printStdDev = true ) {
      	 //Print names
      	 os << '#';
      	 unsigned index = 1;
      	 for (auto it = data.begin();
      	      it != data.end();
      	      ++it ) {
      	    os << setw(25);

	    os << to_string( index ) + it->first;
	    ++index;
	    if (printStdDev) {
	       os << setw(25);

	       os << to_string( index ) + it->first;
	       ++index;
	    }
	    


      	 }
      	 os << endl;
      	 for (auto it = data.begin();
      	      it != data.end();
      	      ++it ) {
	    vector<double>& tmp = it->second;
	    double mean = 0.0;
	    for (size_t i = 0; i < tmp.size(); ++i) {
	       mean += tmp[i];
	    }
	    mean = mean / tmp.size();
	    os << setw(25) << mean ;

	    if (printStdDev) {
	       double stdDev = 0.0;
	       for (size_t i = 0; i < tmp.size(); ++i) {
		  stdDev += (tmp[i]- mean)*(tmp[i]- mean);
	       }
	       if (tmp.size() > 1) {
		  stdDev = stdDev / ( tmp.size() - 1 );
		  stdDev = sqrt( stdDev );
		  os << setw(25) << stdDev ;
	       } else {
		  os << setw(25) << 0.0 ;
	       }
	    }
      	 }
      	 os << endl;
      }

   };

   class algResult {
   public:
      string algName;
      string graphName;
      unsigned n;
      unsigned m;
      double p;
      double preprocess;
    
   };

   /******
    *
    * Graph algorithms
    *
    */

   static uint32_t uint32Max = ~( static_cast< uint32_t >(0) );
  
   /********************************************************
    * Dijkstra's alg.
    * Distances are constrained to be integers
    * s is source, t is target
    */
   class Dijkstra {
   public:
      uint32_t d_infinity = uint32Max; //~( static_cast< uint32_t >(0) );
      node_id  d_undefined = d_infinity;
      vector< uint32_t > h;     //estimate of distance d(u,t) for each u
      vector< uint32_t > h_saved;     //estimate of distance d(u,t) for each u
      vector< node_id >  prev;
      vector< node_id >  forw;
      vector< uint32_t > dist;  //Will store d(s, u) for each u (only interested in dist[t])
      vector< vector< node_id > > all_prev;

      node_id s;
      node_id t;
      tinyGraph& g;
      node_id n;

      bool h_valid = false;
      clock_t t_start;
      double  t_elapsed;
      uint32_t dst;
      double t_dij;

      Dijkstra( node_id ss, node_id tt, tinyGraph& gg )
	 : s( ss ), t( tt ), g( gg ) { n = gg.n; }

      Dijkstra( const Dijkstra& rhs )
	 : h( rhs.h.begin(), rhs.h.end() ),
	   h_saved( rhs.h_saved.begin(), rhs.h_saved.end() ),
	   prev( rhs.prev.begin(), rhs.prev.end() ),
	   forw( rhs.forw.begin(), rhs.forw.end() ),
	   dist( rhs.dist.begin(), rhs.dist.end() ),
	   all_prev( rhs.all_prev.begin(), rhs.all_prev.end() ),
	   s ( rhs.s ),
	   t ( rhs.t ),
	   g ( rhs.g ),
	   n ( rhs.n ),
	   h_valid( rhs.h_valid ),
	   t_elapsed( rhs.t_elapsed ),
	   dst ( rhs.dst ),
	   t_dij( rhs.t_dij )
	   
      {
	
      }

      void print_hPath() {
	 fEdge e;
	 e.x = s;
	 do {
	    e.y = e.x;
	    e.x = forw[ e.y ];
	    cout << " ( " << e.x << " , " << e.y << " ) " << endl; 
	 } while (e.x != t);
      }

      void print_APath() {
	 fEdge e;
	 e.x = t;
	 do {
	    e.y = e.x;
	    e.x = prev[ e.y ];
	    cout << " ( " << e.x << " , " << e.y << " ) " << endl; 
	 } while (e.x != s);
      }

      void emptyQ( MinHeap& Q, uint32_t B = uint32Max ) {
	 node_id curr;
	 node_id anei;
	 uint32_t alt;
	 uint32_t dmin;
	 while (Q.size() > 0) {
	    dmin = Q.GetMin();
	    if (dmin >= B) {
	       return;
	    }
	    curr = Q.extractNode();
	    tinyNode& Curr = g.adjList[ curr ];
	    for (size_t i = 0; i < Curr.neis.size(); ++i) {
	       anei = Curr.neis[i].getId();

	       alt = h[curr] + Curr.neis[i].weight;

	       if (alt < h[ anei ]) {
		  h[ anei ] = alt;
		  forw[ anei ] = curr;
		  Q.Insert(anei, alt );
	       }
	    }
	 }
      }

    
      bool update_dij_after_addition( node_id u, node_id v, unsigned char wht = static_cast<unsigned char>(1),
				      uint32_t B = uint32Max ) {
	 //cout << "update_dij " << u << ' ' << v << ' ' << (unsigned) wht << endl;
	 
	 unsigned weight = static_cast< unsigned >( wht );
	 if (dist[u] >= B)
	    return false;
	 if (dist[u] + weight >= B)
	    return false;
	 if (dist[v] <= dist[u] + weight) {
	    return false;
	 }

	 MinHeap Q;
	 Q._vector.assign( n, d_infinity );
	 Q._vindex.reserve( n );
	 Q._vloc.reserve( n );	 
	 for (size_t i = 0; i < n; ++i) {
	    Q._vindex.push_back( i );
	    Q._vloc.push_back( i );
	 }

	 dist[v] = dist[u] + weight;
	 prev[v] = u;
	 Q.DecreaseValue( v, dist[v] );

	 node_id curr;
	 uint32_t alt;
	 node_id anei;
	 uint32_t d_s_curr;

	 while (Q.size() > 0) {
	    d_s_curr = Q.GetMin();

	    if ( d_s_curr < B ) {
	       curr = Q.extractNode();
	       tinyNode& Curr = g.adjList[ curr ];
	       //cout << curr << ' ' << d_s_curr << endl;
	       for (size_t i = 0; i < Curr.neis.size(); ++i) {
		  anei = Curr.neis[i].getId();

		  alt = dist[curr] + Curr.neis[i].weight;

		  //cout << anei << ' ' << alt << ' ';
		  
		  if (alt < dist[ anei ]) {
		     dist[ anei ] = alt;
		     prev[ anei ] = curr;
		     Q.DecreaseValue( anei, alt );
		  }
	       }
	       //cout << endl;
	    } else {
	       break;
	    }

	 }

	 dst = dist[ t ];
	 
	 return true;
      }
      
      /* Updates the dijkstra distances from
       * t, stored in h[u] = dist(u,t)
       *
       * Only computes distances within bound B
       */
      uint32_t update_dij_after_deletion( node_id u, node_id v, uint32_t B = uint32Max ) {
	 t_start = clock();
	 node_id anei;
	 MinHeap Q( n );
	 if (forw[v] == u) {
	    //Need to update distances, starting with v. Need to use its neighbors
	    queue< node_id > q;
	    q.push( v );
	    node_id curr;
	    while (!q.empty()) {
	       curr = q.front();
	       tinyNode& Curr = g.adjList[ curr ];
	       h[curr] = d_infinity;
	       if (Q.present( curr ))
		  Q.IncreaseValue( curr, d_infinity );
	  
	       for (size_t i = 0; i < Curr.neis.size(); ++i) {
		  anei = Curr.neis[i].getId();
		  if (forw[ anei ] == curr ) {
		     q.push( anei );
		  } else {
		     Q.Insert(anei, h[anei] );
		  }
	       }

	       q.pop();
	    }

	    //There are now no invalid (too small) distances 
	    emptyQ( Q, B );
	
	 } else {
	    if (forw[u] == v) {
	       //Need to update distances, starting with u. Need to use its neighbors
	       queue< node_id > q;
	       q.push( u );
	       node_id curr;
	       while (!q.empty()) {
		  curr = q.front();
		  tinyNode& Curr = g.adjList[ curr ];
		  h[curr] = d_infinity;
		  if (Q.present( curr ))
		     Q.IncreaseValue( curr, d_infinity );
	  
		  for (size_t i = 0; i < Curr.neis.size(); ++i) {
		     anei = Curr.neis[i].getId();
		     if (forw[ anei ] == curr ) {
			q.push( anei );
		     } else {
			Q.Insert(anei, h[anei] );
		     }
		  }

		  q.pop();
	       }

	       //There are now no invalid (too small) distances 
	       emptyQ( Q, B );
	    }
	 }

	 t_elapsed = elapsedTime( t_start );
	 return h[s];
      }
    

      void save_h() {
	 h_saved.assign( h.begin(), h.end() );
      }
    
      void restore_h() {
	 h.assign( h_saved.begin(), h_saved.end() );
      }

      /*
       * This function assumes graph is undirected
       * otherwise, swapping the pair like this doesn't
       * work as intended
       */
      uint32_t compute_h( uint32_t B = uint32Max ) {
	 uint32_t tDst;
	 swap( s, t );
	 tDst = compute_dij( B );
	 h.assign( dist.begin(), dist.end() );
	 forw.assign( prev.begin(), prev.end() );
	 h_valid = true;
	 swap( s, t );
	 return tDst;
      }
    
      /* Performs Dijkstra's alg from source s
       * to compute dist(u) = dist(s, u) for each u 
       * 
       * Quits when distance exceeds B
       * Distances are constrained to be integers
       *
       * Returns distance of shortest path between s,t
       */
      uint32_t compute_dij( uint32_t B = uint32Max ) {
	 t_start = clock();
	 MinHeap Q;
	 Q._vector.assign( n, d_infinity );
	 Q._vindex.reserve( n );
	 Q._vloc.reserve( n );
	 for (size_t i = 0; i < n; ++i) {
	    Q._vindex.push_back( i );
	    Q._vloc.push_back( i );
	 }

	 prev.assign( n, d_undefined );
	 dist.assign( n, d_infinity );
	 dist[s] = 0;
    
	 Q.DecreaseValue( s, 0 );

	 node_id curr;
	 uint32_t alt;
	 node_id anei;
	 uint32_t d_s_curr;
	 while (Q.size() > 0) {
	    d_s_curr = Q.GetMin();
	    if ( d_s_curr < B ) {
	       curr = Q.extractNode();
	       tinyNode& Curr = g.adjList[ curr ];
	       for (size_t i = 0; i < Curr.neis.size(); ++i) {
		  anei = Curr.neis[i].getId();

		  alt = dist[curr] + Curr.neis[i].weight;

		  if (alt < dist[ anei ]) {
		     dist[ anei ] = alt;
		     prev[ anei ] = curr;
		     Q.DecreaseValue( anei, alt );
		  }
	       }
	    } else {
	       break;
	    }

	 }

	 //clear Q, resetting unsure distances to infinity
	 // if (Q.size() > 0) {
	 // 	d_s_curr = Q.GetMin();
	 // 	while (d_s_curr < d_infinity) {
	 // 	  curr = Q.extractNode();
	 // 	  h[ curr ] = d_infinity;
	 // 	  if (Q.size() == 0)
	 // 	    break;
	 // 	}
	 // }
      
	 t_elapsed = elapsedTime( t_start );
	 t_dij = t_elapsed;
	 dst = dist[t];
	 return dst;
      }

      /* Performs Dijkstra's alg from source s
       * to compute dist(u) = dist(s, u) for each u 
       * 
       * Quits when distance exceeds B
       * Distances are constrained to be integers
       *
       * Returns distance of shortest path between s,t
       *
       * Differs from above functiion by storing all
       * shortest paths by storing a vector of all
       * the previous nodes in all_prev
       */
      uint32_t compute_dij_all_paths( uint32_t B = uint32Max ) {
	 t_start = clock();
	 MinHeap Q;
	 Q._vector.assign( n, d_infinity );
	 Q._vindex.reserve( n );
	 Q._vloc.reserve( n );
	 for (size_t i = 0; i < n; ++i) {
	    Q._vindex.push_back( i );
	    Q._vloc.push_back( i );
	 }

	 vector< node_id > prevEmptySet;
	 all_prev.assign( n, prevEmptySet );
	 dist.assign( n, d_infinity );
	 dist[s] = 0;
    
	 Q.DecreaseValue( s, 0 );

	 node_id curr;
	 uint32_t alt;
	 node_id anei;
	 uint32_t d_s_curr;
	 while (Q.size() > 0) {
	    d_s_curr = Q.GetMin();
	    if ( d_s_curr < B ) {
	       curr = Q.extractNode();
	       tinyNode& Curr = g.adjList[ curr ];
	       for (size_t i = 0; i < Curr.neis.size(); ++i) {
		  anei = Curr.neis[i].getId();

		  alt = dist[curr] + Curr.neis[i].weight;

		  if (alt < dist[ anei ]) {
		     dist[ anei ] = alt;
		     all_prev[ anei ].clear();
		     
		     all_prev[ anei ].push_back( curr );
		     Q.DecreaseValue( anei, alt );
		  } else {
		     if (alt == dist[ anei ]) {
			all_prev[ anei ].push_back( curr );
		     }
		  }
	       }
	    } else {
	       break;
	    }

	 }

	 //clear Q, resetting unsure distances to infinity
	 // if (Q.size() > 0) {
	 // 	d_s_curr = Q.GetMin();
	 // 	while (d_s_curr < d_infinity) {
	 // 	  curr = Q.extractNode();
	 // 	  h[ curr ] = d_infinity;
	 // 	  if (Q.size() == 0)
	 // 	    break;
	 // 	}
	 // }
      
	 t_elapsed = elapsedTime( t_start );
	 t_dij = t_elapsed;
	 dst = dist[t];
	 return dst;
      }

      /* Astar update after distance of some edges
       * in g has increased
       * Distances are constrained to be integers
       * Proceeds from s to t
       *
       * Returns distance of shortest path between s,t
       * path from s to t can be reconstructed using prev
       */
      uint32_t update_Astar() {
	 t_start = clock();
      
	 node_id n = g.n;
	 MinHeap Q;
	 Q._vector.assign( n, d_infinity );
	 Q._vindex.reserve( n );
	 Q._vloc.reserve( n );
	 for (size_t i = 0; i < n; ++i) {
	    Q._vindex.push_back( i );
	    Q._vloc.push_back( i );
	 }

	 dist.assign( n, d_infinity );
	 prev.assign( n, d_undefined );
	 dist[s] = 0;
    
	 Q.DecreaseValue( s, h[ s ] ); //start with estimate of dist(s, t)

	 node_id curr;
	 uint32_t alt;
	 node_id anei;
	 uint32_t d_s_curr;
	 while (Q.size() > 0) {
	    d_s_curr = Q.GetMin();
	    if (d_s_curr < d_infinity) {
	       curr = Q.extractNode();
	       //	  cerr << curr << ' ' << d_s_curr << endl;

	       if (curr == t)
		  break;


	  
	       tinyNode& Curr = g.adjList[ curr ];
	       for (size_t i = 0; i < Curr.neis.size(); ++i) {
		  anei = Curr.neis[i].getId();

		  alt = dist[curr] + Curr.neis[i].weight; //+ old_dist[ curr ] - old_dist[ anei ];

		  if (alt < dist[ anei ]) {
		     dist[ anei ] = alt;
		     prev[ anei ] = curr;
		     if (h[anei] < d_infinity) {
			Q.Insert( anei, alt + (h[anei]) );
		     } else {
			Q.Insert( anei, alt );
		     }
		  }
	       }
	  
	    } else {
	       break;
	    }

	 }

	 t_elapsed = elapsedTime( t_start );
	 dst = dist[ t ];
	 return dist[ t ];
      }

   };

   // Dijkstra& operator=( const Dijkstra& rhs ) {
   //   h.assign( rhs.h.begin(), rhs.h.end() );
   //   prev.assign( rhs.prev.begin(), rhs.prev.end() );
   //   forw.assign( rhs.forw.begin(), rhs.forw.end() );
   //   s = rhs.s;
   //   t = rhs.t;
   //   g = rhs.g;
   //   n = rhs.n;
   //   h_valid = rhs.h_valid;

   //   return *this;
   // }

   /*
    * (Bounded) Path enumeration
    *
    */
   class NodePath {
   public:
      vector< node_id > nodes;
      vector< fEdge > fedges;
      vector< set< fEdge, fEdgeLT >::iterator > edges;
    
      uint32_t length;
      NodePath() : length( 0 ) { }

      NodePath( const NodePath& rhs ) : nodes( rhs.nodes.begin(), rhs.nodes.end() ),
					edges( rhs.edges.begin(), rhs.edges.end() ), length( rhs.length) { }
      void addNode ( const node_id& x, uint32_t w ) {
	 nodes.push_back( x );
	 length += w;
      }
      bool ctns( const node_id& x ) {
	 for (size_t i = 0; i < nodes.size(); ++i) {
	    if (nodes[i] == x)
	       return true;
	 }

	 return false;
      }

      void print( ostream& os ) {
	 for (size_t i = 0; i < nodes.size(); ++i) {
	    os << nodes[i] << ' ';
	 }
	 os << "len:" << length << endl;
      }
  
   };

   void enumBoundedPaths( vector < NodePath >& res, node_id s, node_id t, tinyGraph& g, uint32_t T ) {
      res.clear();

      NodePath S;
      S.nodes.push_back( s );
      queue < NodePath > Q; //Queue of partial paths
      Q.push( S );
      while (!Q.empty()) {
	 NodePath& p1 = Q.front();
	 //p1 is a simple path, starting from s, of length <= T
	 node_id& lastNode = p1.nodes.back();
	 //expand edges of lastNode
	 for (size_t i = 0; i < g.adjList[ lastNode ].neis.size(); ++i) {
	    //If path remains valid in this direction
	    uint32_t ewht = g.adjList[ lastNode ].neis[i].weight;
	    if ( p1.length + ewht  <= T ) {
	       //Path remains valid
	       node_id anei = g.adjList[ lastNode ].neis[i].getId();
	       if (!p1.ctns( anei)){
		  //Path remains simple
		  NodePath newpath( p1 );
		  newpath.nodes.push_back( anei );
		  newpath.length += ewht; 
		  //Are we there yet?
		  if (anei == t) {
		     //found a valid path!
		     //Add it to the results
		     res.push_back( newpath );
		  } else {
		     //Keep looking
		     Q.push( newpath );
		  }
	       }
	    }
	 }
	 Q.pop();
      }
   }
  
}


#endif
